# Supplementary material for: An umpolung strategy for rapid access to thermally activated delayed fluorescence (TADF) materials based on phenazine
Source: Royal Society of Chemistry journal article supplement (doi:10.1039/d1cc06705b), 2021-12-24

## *Supporting Information*

# **An umpolung strategy for rapid access to thermally activated delayed fluorescent (TADF) materials based on phenazine<sup>†</sup>**

Huaxing Zhang,<sup>a</sup> Qiang Guo,<sup>b</sup> Hu Cheng,<sup>a</sup> Chunhao Ran,<sup>a</sup> Di Wu<sup>\*a</sup> and Jingbo Lan<sup>\*a</sup>

<sup>a</sup>Key Laboratory of Green Chemistry and Technology of Ministry of Education, College of  
Chemistry, Sichuan University, 29 Wangjiang Road, Chengdu 610064, P.R. China

<sup>b</sup>College of Optoelectronic Engineering, Chengdu University of Information Technology, 24  
Xuefu Road, Chengdu 610225, P.R. China

## Table of contents

|                                                                                                                                            |     |
|--------------------------------------------------------------------------------------------------------------------------------------------|-----|
| I. General remarks.....                                                                                                                    | S1  |
| II. Preliminary regioselectivity investigation.....                                                                                        | S1  |
| III. Synthesis and compounds characterization.....                                                                                         | S4  |
| IV. Single crystal X-ray structures of <b>4j</b> , <b>4m</b> , <b>5a</b> , <b>6f</b> , <b>6h</b> , <b>6i</b> , <b>6j</b> , <b>6k</b> ..... | S41 |
| V. Mechanistic study.....                                                                                                                  | S49 |
| VI. DFT calculations of local electrophilicity/nucleophilicity.....                                                                        | S54 |
| VII. Photophysical data.....                                                                                                               | S57 |
| VIII. References.....                                                                                                                      | S60 |
| IX. Copies of NMR spectra.....                                                                                                             | S61 |

## I. General remarks

NMR spectra were obtained on a Bruker AV II-400 MHz or a Varian Inova 400 MHz spectrometer. The  $^1\text{H}$  NMR (400 MHz) chemical shifts were measured relative to  $\text{CDCl}_3$ ,  $\text{DMSO}-d_6$  or  $\text{CDCl}_2\text{CDCl}_2$  as the internal reference ( $\text{CDCl}_3$ :  $\delta = 7.26$  ppm;  $\text{DMSO}-d_6$ :  $\delta = 2.50$  ppm;  $\text{CDCl}_2\text{CDCl}_2$ :  $\delta = 6.00$  ppm). The  $^{13}\text{C}$  NMR (100 MHz) chemical shifts were given using  $\text{CDCl}_3$  or  $\text{DMSO}-d_6$  as the internal standard ( $\text{CDCl}_3$ :  $\delta = 77.16$  ppm;  $\text{DMSO}-d_6$ :  $\delta = 39.52$  ppm). High resolution mass spectra (HR-MS) were obtained with a Shimadzu LCMS-ITTOF (ESI). X-Ray single-crystal diffraction data were collected on an Agilent Technologies Gemini plus or an Oxford Xcalibur E single crystal diffraction. Melting points were determined with XRC-1 and are uncorrected. UV/Vis spectra were measured on a HITACHI U-2910. Fluorescence spectra were collected on a Horiba Jobin Yvon-Edison Fluoromax-4 fluorescence spectrometer with a calibrated integrating sphere system. To reduce the fluctuation in the excitation intensity, the xenon lamp was kept on for 1 hour prior to the experiment. Transient PL decay spectra were obtained with Horiba Single Photon Counting Controller: FluoroHub and Horiba TBX Picosecond Photon Detection.

Unless otherwise noted, all reagents were obtained from commercial suppliers and used without further purification. Arylboronic acids<sup>1</sup> and 2-aryl diazaboroles<sup>2</sup> were prepared according to the literature.

## II. Preliminary regioselectivity investigation

### i) Reductive cyclization of 2-nitro-3'-phenyl-diphenylamine

#### 1) Cadogan reaction of 2-nitro-3'-phenyl-diphenylamine<sup>3</sup>

A flame-dried Schlenk tube with a magnetic stir bar was charged with 2-nitro-3'-phenyl-diphenylamine (100 mg, 0.34 mmol),  $\text{PPh}_3$  (267.5 mg, 1.02 mmol, 3.0 equiv). Next, the solvent toluene (3 mL) was added *via* a syringe and the rubber septum was replaced with a stopper. Then the reaction mixture was stirred at the 230 °C for 4 h under an air atmosphere in an oil bath. After the reaction mixture was cooled to ambient temperature, the solvent was removed under reduced pressure. The residue was

dissolved in 10 mL of CH<sub>2</sub>Cl<sub>2</sub>, filtered through a celite pad, and then washed with 20-30 mL of CH<sub>2</sub>Cl<sub>2</sub>. The combined filtrates were concentrated and purified *via* column chromatography on silica gel (100-200 mesh) to provide the desired products.

**Scheme S1. Cadogan reaction of 2-nitro-3'-phenyl-diphenylamine**

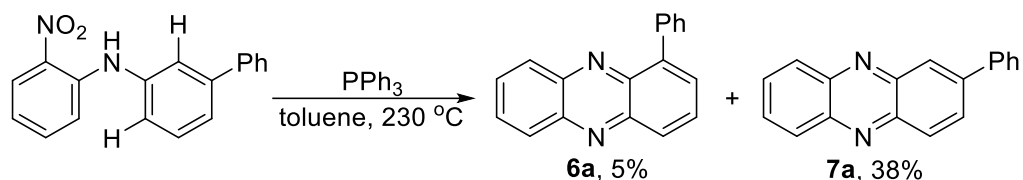

Reaction conditions: 2-nitro-3'-phenyl-diphenylamine (0.34 mmol), PPh<sub>3</sub> (3.0 equiv), and toluene (3.0 mL) at 230 °C for 4 h under Air.

**2) Reductive cyclization of 2-nitro-3'-phenyl-diphenylamine in the presence of NaBH<sub>4</sub>**<sup>4</sup>

A flame-dried Schlenk bottle with a magnetic stir bar was charged with 2-nitro-3'-phenyl-diphenylamine (192 mg, 0.66 mmol), NaBH<sub>4</sub> (99.8 mg, 2.64 mmol, 4.0 equiv). Next, 5 M NaOMe in MeOH (35 mL) was added *via* a syringe and the rubber septum was replaced with a stopper, then the reaction mixture was stirred at the 100 °C for 4 h in an oil bath. After the reaction mixture was cooled to ambient temperature, the solvent was removed under reduced pressure. The residue was dissolved in 10 mL of CH<sub>2</sub>Cl<sub>2</sub>, filtered through a celite pad, and then washed with 20-30 mL of CH<sub>2</sub>Cl<sub>2</sub>. The combined filtrates were concentrated and purified *via* column chromatography on silica gel (100-200 mesh) to provide the desired products.

**Scheme S2. Reductive cyclization reaction of 2-nitro-3'-phenyl-diphenylamine in the presence of NaBH<sub>4</sub>**

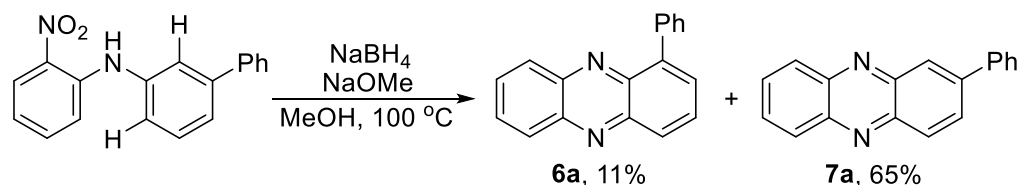

Reaction conditions: 2-nitro-3'-phenyl-diphenylamine (0.66 mmol), NaBH<sub>4</sub> (4.0 equiv) and 5 M NaOMe in MeOH (35 mL) at 100 °C for 4 h under Air.

**ii) Oxidative cyclization of 2-amino-3'-phenyl-diphenylamine**



### 1) Oxidative cyclization of 2-amino-3'-phenyl-diphenylamine in the presence of Ag<sub>2</sub>O

A flame-dried Schlenk tube with a magnetic stir bar was charged with 2-amino-3'-phenyl-diphenylamine (52.0 mg, 0.2 mmol), Ag<sub>2</sub>O (185.4 mg, 4.0 equiv). The system was evacuated thrice and back filled with N<sub>2</sub>. Next, the solvent DMSO was added *via* a syringe and the rubber septum was replaced with a stopper under N<sub>2</sub>. Then the reaction mixture was stirred at 80 °C for 24 h in an oil bath. After the reaction mixture was cooled to ambient temperature, the solvent was removed under reduced pressure. The residue was dissolved in 10 mL of CH<sub>2</sub>Cl<sub>2</sub>, filtered through a celite pad, and then washed with 20-30 mL of CH<sub>2</sub>Cl<sub>2</sub>. The combined filtrates were concentrated and purified *via* column chromatography on silica gel (100-200 mesh) to provide the desired products.

#### Scheme S3. Oxidative cyclization of 2-amino-3'-phenyl-diphenylamine in the presence of Ag<sub>2</sub>O

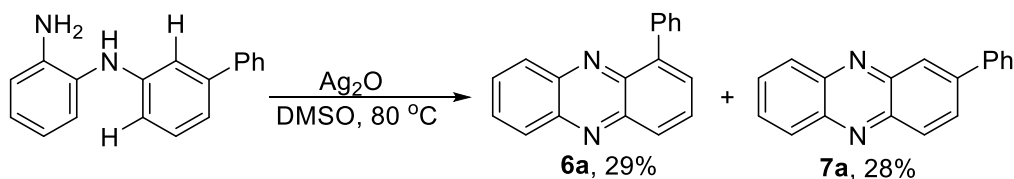

Reaction conditions: 2-amino-3'-phenyl-diphenylamine (0.2 mmol), Ag<sub>2</sub>O (4.0 equiv) and DMSO (2.0 mL) at 80 °C for 24 h under N<sub>2</sub>.

### 2) Oxidative cyclization of 2-amino-3'-phenyl-diphenylamine treated by BBr<sub>3</sub><sup>5</sup>

A flame-dried Schlenk tube with a magnetic stir bar was charged with 2-amino-3'-phenyl-diphenylamine (130 mg, 0.5 mmol). Next, the solvent *o*-dichlorobenzene (10 mL) was added *via* a syringe and the rubber septum was replaced with a stopper. Then the NEt<sub>3</sub> (139 μL, 2.0 equiv) was added to the reaction at 0 °C. After stir for 5 minutes, the BBr<sub>3</sub> (72 μL) was added. Then the reaction mixture was stirred at the 180 °C for 8 h under an N<sub>2</sub> atmosphere in an oil bath. After the reaction mixture was cooled to ambient temperature, the solvent was removed under reduced pressure. The residue was purified *via* flash column chromatography on silica gel (100-200 mesh) with DCM to provide the crude products. The crude was detected by high resolution mass (HRMS (ESI<sup>+</sup>): calcd for C<sub>18</sub>H<sub>16</sub>BN<sub>2</sub>O<sup>+</sup> [IM3' + H]<sup>+</sup> 287.1350, found 287.1343). Next, the crude

product was treated by AgO<sub>2</sub> to get 1-phenyl phenazine and 2-phenyl phenazine.

**Scheme S4. Oxidative cyclization reaction after treated by BBr<sub>3</sub>**

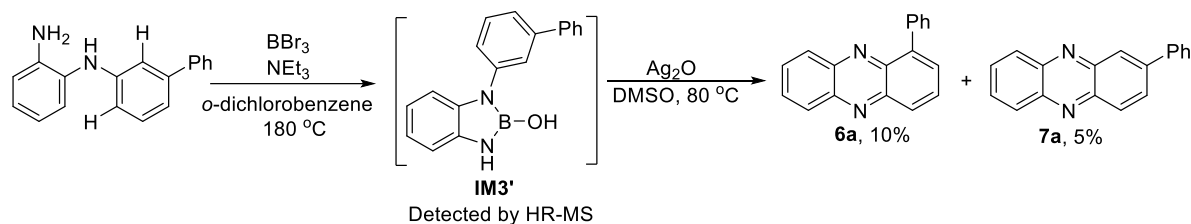

**3) Oxidative cyclization reaction of 2-phenyl diazaborole**

A flame-dried Schlenk tube with a magnetic stir bar was charged with 2-([1,1'-biphenyl]-3-yl)-2,3-dihydro-1*H*-benzo[*d*][1,3,2]diazaborole (**3a**, 0.2 mmol), Ag<sub>2</sub>O (4.0 equiv). The system was evacuated thrice and back filled with N<sub>2</sub>. Next, the solvent DMSO (2 mL) was added *via* a syringe and the rubber septum was replaced with a stopper under N<sub>2</sub>. Then the reaction mixture was stirred at the 80 °C for 24 h in an oil bath. After the reaction mixture was cooled to ambient temperature, the solvent was removed under reduced pressure. The residue was dissolved in 10 mL of CH<sub>2</sub>Cl<sub>2</sub>, filtered through a celite pad, and then washed with 20-30 mL of CH<sub>2</sub>Cl<sub>2</sub>. The combined filtrates were concentrated and purified *via* column chromatography on silica gel (100-200 mesh) to provide the desired products.

**Scheme S5. Oxidative cyclization reaction of 2-aryl diazaborole**

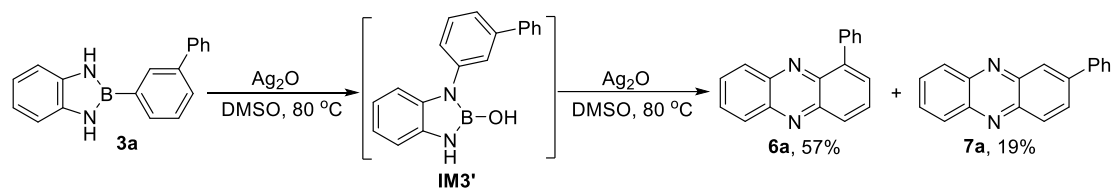

Reaction conditions: **3a** (0.2 mmol), Ag<sub>2</sub>O (4.0 equiv) and DMSO (2.0 mL) at 80 °C for 24 h under N<sub>2</sub>.

**III. Synthesis and compounds characterization**

**i) Synthesis of 2-aryl diazaborole substrates**

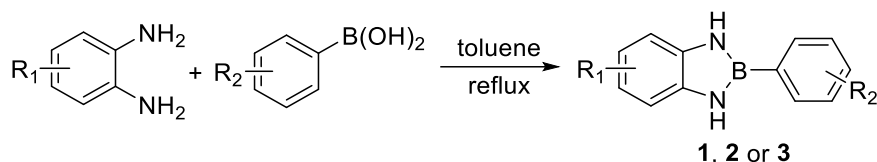

2-Aryl diazaboroles were prepared according to the literature.<sup>2</sup>

To a solution of *o*-phenylenediamine in toluene (5 mmol in 50 mL) was added aryl boronic acid (5 mmol) in one portion. The round-bottomed flask was equipped with a Dean and Stark trap, and the solution was stirred and heated to reflux at 120 °C for 4 h. The precipitate was isolated and recrystallization. 2-Aryl diazaborole substrates were obtained without further purification because of their poor stability in the process of separation and purification by column chromatography.

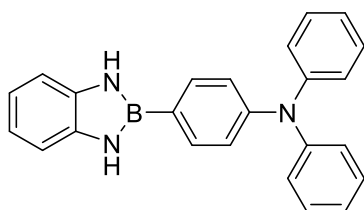

#### 4-(1,3-Dihydro-2*H*-benzo[*d*][1,3,2]diazaborol-2-yl)-*N,N*-diphenylaniline (**1k**)

Following the general procedure, 4-(1,3-dihydro-2*H*-benzo[*d*][1,3,2]diazaborol-2-yl)-*N,N*-diphenylaniline was prepared (90%, white solid).

<sup>1</sup>H NMR (400 MHz, CDCl<sub>3</sub>)  $\delta$  = 6.71 (s, 2H), 6.96 (dd, *J* = 5.6 Hz, 3.2 Hz, 2H), 7.05-7.16 (m, 10H), 7.27-7.31 (m, 4H), 7.59 (d, *J* = 8.0 Hz, 2H). <sup>13</sup>C NMR (100 MHz, CDCl<sub>3</sub>)  $\delta$  = 111.1, 119.3, 122.6, 123.4, 124.3, 125.0, 129.5, 134.1, 136.6, 147.6, 149.4. HRMS (ESI<sup>+</sup>): calcd for C<sub>24</sub>H<sub>21</sub>BN<sub>3</sub><sup>+</sup> [*M*+*H*]<sup>+</sup> 362.1823, found 362.1818.

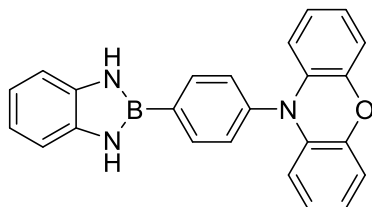

#### 10-(4-(1,3-Dihydro-2*H*-benzo[*d*][1,3,2]diazaborol-2-yl)phenyl)-10*H*-phenoxazine (**1n**)

Following the general procedure, 10-(4-(1,3-dihydro-2*H*-benzo[*d*][1,3,2]diazaborol-2-yl)phenyl)-10*H*-phenoxazine was prepared (43%, white solid). <sup>1</sup>H NMR (400 MHz,

DMSO-*d*<sub>6</sub>)  $\delta$  = 5.91-5.93 (m, 2H), 6.65-6.68 (m, 4H), 6.73-6.76 (m, 2H), 6.85 (dd,  $J$  = 5.6 Hz, 3.2 Hz, 2H), 7.09 (dd,  $J$  = 6.0 Hz, 3.6 Hz, 2H), 7.46 (d,  $J$  = 8.0 Hz, 2H), 8.18 (d,  $J$  = 8.4 Hz, 2H), 9.28 (s, 2H). <sup>13</sup>C NMR (100 MHz, DMSO-*d*<sub>6</sub>)  $\delta$  = 111.0, 113.3, 115.3, 118.5, 121.5, 123.8, 129.9, 133.9, 136.3, 137.1, 139.2, 143.1. HRMS (ESI<sup>+</sup>): calcd for C<sub>24</sub>H<sub>19</sub>BN<sub>3</sub>O<sup>+</sup> [M+H]<sup>+</sup> 376.1616, found 376.1612.

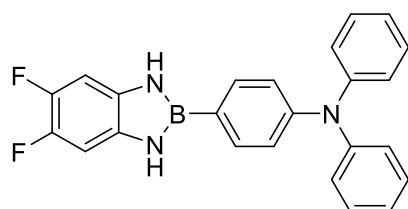

**4-(5,6-Difluoro-1,3-dihydro-2*H*-benzo[*d*][1,3,2]diazaborol-2-yl)-*N,N*-diphenylaniline (2a)**

Following the general procedure, 4-(5,6-difluoro-1,3-dihydro-2*H*-benzo[*d*][1,3,2]diazaborol-2-yl)-*N,N*-diphenylaniline was prepared (63%, white solid). <sup>1</sup>H NMR (400 MHz, CDCl<sub>3</sub>)  $\delta$  = 6.62 (s, 2H), 6.87 (t,  $J$  = 8.8 Hz, 2H), 7.05-7.14 (m, 9H), 7.28-7.30 (m, 3H), 7.53 (d,  $J$  = 8.0 Hz, 2H). <sup>13</sup>C NMR (100 MHz, CDCl<sub>3</sub>)  $\delta$  = 99.61 (dd,  $J_{C-F}$  = 13.4 Hz, 8.7 Hz), 122.4, 122.8, 123.6, 124.2, 125.1, 129.42 (d,  $J_{C-F}$  = 17.7 Hz), 131.8 (t,  $J_{C-F}$  = 5.3 Hz), 134.0, 147.4, 149.7. HRMS (ESI<sup>+</sup>): calcd for C<sub>24</sub>H<sub>19</sub>BF<sub>2</sub>N<sub>3</sub><sup>+</sup> [M+H]<sup>+</sup> 398.1635, found 398.1637.

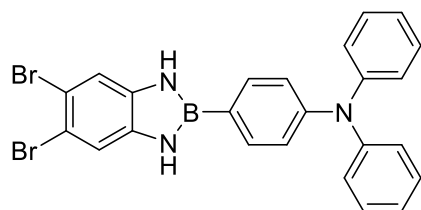

**4-(5,6-Dibromo-1,3-dihydro-2*H*-benzo[*d*][1,3,2]diazaborol-2-yl)-*N,N*-diphenylaniline (2c)**

Following the general procedure, 4-(5,6-dibromo-1,3-dihydro-2*H*-benzo[*d*][1,3,2]diazaborol-2-yl)-*N,N*-diphenylaniline was prepared (72%, white solid). <sup>1</sup>H NMR (400 MHz, CDCl<sub>3</sub>)  $\delta$  = 7.53 (d,  $J$  = 8.0 Hz, 2H), 7.29 (d,  $J$  = 8.8 Hz, 5H), 7.13 (d,  $J$  = 8.0 Hz, 4H), 7.05-7.10 (m, 5H), 6.66 (s, 2H). <sup>13</sup>C NMR (100 MHz, CDCl<sub>3</sub>)  $\delta$  = 149.9, 147.4, 137.2, 134.2, 129.5, 125.2, 124.3, 123.7, 122.2, 115.3, 113.5. HRMS (ESI<sup>+</sup>): calcd for C<sub>24</sub>H<sub>19</sub>BBr<sub>2</sub>N<sub>3</sub><sup>+</sup> [M+H]<sup>+</sup> 518.0034, 520.0013, 521.9993, found

518.0037, 520.0017, 521.9995.

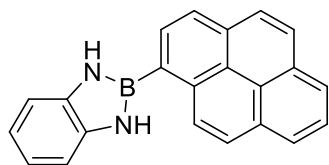

**2-(Pyren-1-yl)-2,3-dihydro-1H-benzo[d][1,3,2]diazaborole (2i)**

Following the general procedure, 2-(pyren-1-yl)-2,3-dihydro-1H-benzo[d][1,3,2]diazaborole was prepared (81%, white solid).  $^1\text{H}$  NMR (400 MHz,  $\text{CDCl}_3$ )  $\delta$  = 7.04-7.10 (m, 4H), 7.27-7.28 (m, 2H), 8.05 (t,  $J$  = 7.2 Hz, 1H), 8.10-8.16 (m, 3H), 8.23 (d,  $J$  = 7.2 Hz, 3H), 8.30 (d,  $J$  = 7.6 Hz, 1H), 8.55 (d,  $J$  = 8.8 Hz, 1H).  $^{13}\text{C}$  NMR (100 MHz,  $\text{CDCl}_3$ )  $\delta$  = 111.4, 119.7, 124.5, 124.7, 125.0, 125.2, 125.3, 126.0, 127.6, 127.8, 127.9, 128.1, 131.0, 131.5, 132.0, 132.1, 134.6, 136.4. HRMS ( $\text{ESI}^+$ ): calcd for  $\text{C}_{22}\text{H}_{16}\text{BN}_2^+$   $[\text{M}+\text{H}]^+$  319.1402, found 319.1401.

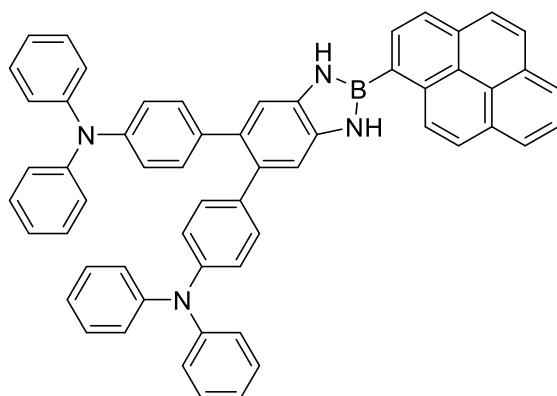

**4,4'-(2-(Pyren-1-yl)-2,3-dihydro-1H-benzo[d][1,3,2]diazaborole-5,6-diyl)bis(*N,N*-diphenylaniline) (2j)**

Following the general procedure, 4,4'-(2-(pyren-1-yl)-2,3-dihydro-1H-benzo[d][1,3,2]diazaborole-5,6-diyl)bis(*N,N*-diphenylaniline) was prepared (66%, white solid).  $^1\text{H}$  NMR (400 MHz,  $\text{CDCl}_3$ )  $\delta$  = 6.98-7.05 (m, 10H), 7.10-7.12 (m, 12H), 7.22-7.24 (m, 7H), 7.261-7.262 (m, 1H), 7.30 (s, 2H), 8.02-8.05 (m, 1H), 8.12-8.15 (m, 3H), 8.21-8.24 (m, 3H), 8.31 (d,  $J$  = 7.6 Hz, 1H), 8.55 (d,  $J$  = 9.2 Hz, 1H).  $^{13}\text{C}$  NMR (100 MHz,  $\text{CDCl}_3$ )  $\delta$  = 113.0, 122.7, 123.6, 124.2, 124.5, 124.68, 124.73, 125.0, 125.3, 125.4, 126.1, 127.7, 127.8, 128.2, 129.3, 129.4, 131.0, 131.3, 131.5, 132.0, 132.2, 132.7, 134.7, 135.9, 137.3, 145.8, 148.0. HRMS ( $\text{ESI}^+$ ): calcd for  $\text{C}_{58}\text{H}_{41}\text{BN}_4\text{Na}^+$   $[\text{M}+\text{H}]^+$  827.3316, found 827.3315.

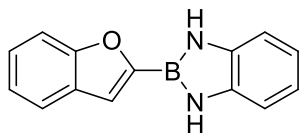

### 2-(Benzofuran-2-yl)-2,3-dihydro-1H-benzo[d][1,3,2]diazaborole (2l)

Following the general procedure, 2-(benzofuran-2-yl)-2,3-dihydro-1H-benzo[d][1,3,2]diazaborole was prepared (80%, white solid).  $^1\text{H}$  NMR (400 MHz,  $\text{CDCl}_3$ )  $\delta$  = 6.74 (s, 2H), 6.98-7.02 (m, 4H), 7.165-7.17 (m, 2H), 7.33-7.37 (m, 1H), 7.56 (d,  $J$  = 8.4 Hz, 1H), 7.66 (d,  $J$  = 7.6 Hz, 1H).  $^{13}\text{C}$  NMR (100 MHz,  $\text{CDCl}_3$ )  $\delta$  = 111.5, 111.6, 115.5, 117.1, 119.9, 120.7, 121.6, 122.8, 125.3, 135.9. HRMS ( $\text{ESI}^+$ ): calcd for  $\text{C}_{14}\text{H}_{12}\text{BN}_2\text{O}^+$   $[\text{M}+\text{H}]^+$  235.1037, found 235.1031.

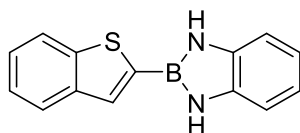

### 2-(Benzo[b]thiophen-2-yl)-2,3-dihydro-1H-benzo[d][1,3,2]diazaborole (2m)

Following the general procedure, 2-(benzo[b]thiophen-2-yl)-2,3-dihydro-1H-benzo[d][1,3,2]diazaborole was prepared (36%, pink solid).  $^1\text{H}$  NMR (400 MHz,  $\text{CDCl}_3$ )  $\delta$  = 7.92-7.94 (m, 1H), 7.87-7.89 (m, 1H), 7.75 (s, 1H), 7.37-7.39 (m, 2H), 7.14-7.16 (m, 2H), 6.99-7.01 (m, 2H), 6.87 (s, 2H).  $^{13}\text{C}$  NMR (100 MHz,  $\text{CDCl}_3$ )  $\delta$  = 111.5, 119.9, 122.6, 124.0, 124.5, 125.0, 128.8, 130.7, 135.3, 138.2. HRMS ( $\text{ESI}^+$ ): calcd for  $\text{C}_{14}\text{H}_{12}\text{BN}_2\text{S}^+$   $[\text{M}+\text{H}]^+$  251.0809, found 251.0813.

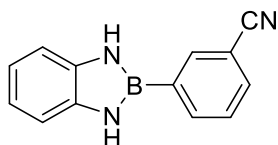

### 3-(1,3-Dihydro-2H-benzo[d][1,3,2]diazaborol-2-yl)benzonitrile (3b)

Following the general procedure, 3-(1,3-dihydro-2H-benzo[d][1,3,2]diazaborol-2-yl)benzonitrile was prepared (95%, white solid).  $^1\text{H}$  NMR (400 MHz,  $\text{CDCl}_3$ )  $\delta$  = 6.87 (s, 2H), 6.99-7.03 (m, 2H), 7.15-7.17 (m, 2H), 7.54 (t,  $J$  = 7.6 Hz, 1H), 7.71 (dd,  $J$  = 7.6 Hz, 1.2 Hz, 1H), 7.93-7.95 (m, 1H), 8.01 (s, 1H).  $^{13}\text{C}$  NMR (100 MHz,  $\text{CDCl}_3$ )  $\delta$  = 111.6, 111.7, 119.1, 120.0, 129.0, 133.1, 136.0, 136.7, 137.2. HRMS ( $\text{ESI}^+$ ): calcd for  $\text{C}_{13}\text{H}_{11}\text{BN}_3^+$   $[\text{M}+\text{H}]^+$  220.1041, found 220.1040.

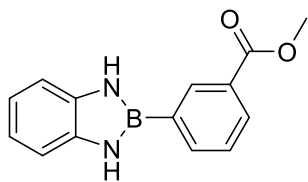

**Methyl 3-(1,3-dihydro-2H-benzo[d][1,3,2]diazaborol-2-yl)benzoate (3c)**

Following the general procedure, methyl 3-(1,3-dihydro-2H-benzo[d][1,3,2]diazaborol-2-yl)benzoate was prepared (90%, white solid).  $^1\text{H}$  NMR (400 MHz,  $\text{CDCl}_3$ )  $\delta$  = 3.95 (s, 3H), 6.89 (s, 2H), 6.99-7.02 (m, 2H), 7.14-7.16 (m, 2H), 7.81 (d,  $J$  = 7.6 Hz, 2H), 8.08-8.10 (m, 2H).  $^{13}\text{C}$  NMR (100 MHz,  $\text{CDCl}_3$ )  $\delta$  = 52.3, 111.5, 119.80, 119.83, 129.2, 131.06, 131.09, 136.2, 167.3. HRMS ( $\text{ESI}^+$ ): calcd for  $\text{C}_{14}\text{H}_{14}\text{BN}_2\text{O}_2^+$   $[\text{M}+\text{H}]^+$  253.1143, found 253.1148.

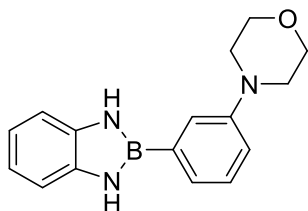

**4-(3-(1,3-Dihydro-2H-benzo[d][1,3,2]diazaborol-2-yl)phenyl)morpholine (3e)**

Following the general procedure, 4-(3-(1,3-dihydro-2H-benzo[d][1,3,2]diazaborol-2-yl)phenyl)morpholine was prepared (89%, white solid).  $^1\text{H}$  NMR (400 MHz,  $\text{CDCl}_3$ )  $\delta$  = 3.23 (t,  $J$  = 4.8 Hz, 4H), 3.91 (t,  $J$  = 4.8 Hz, 4H), 6.79 (s, 2H), 6.97-7.03 (m, 3H), 7.12-7.14 (m, 2H), 7.26-7.30 (m, 2H), 7.37 (t,  $J$  = 7.6 Hz, 1H).  $^{13}\text{C}$  NMR (100 MHz,  $\text{CDCl}_3$ )  $\delta$  = 49.7, 67.1, 111.2, 117.5, 119.5, 120.4, 125.1, 129.2, 136.4, 151.2. HRMS ( $\text{ESI}^+$ ): calcd for  $\text{C}_{16}\text{H}_{19}\text{BN}_3\text{O}^+$   $[\text{M}+\text{H}]^+$  280.1616, found 280.1616.

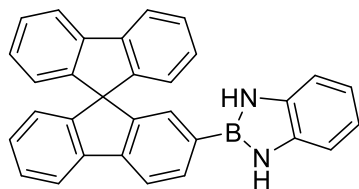

**2-(9,9'-Spiro[fluoren]-2-yl)-2,3-dihydro-1H-benzo[d][1,3,2]diazaborole (3f)**

Following the general procedure, 2-(9,9'-spiro[fluoren]-2-yl)-2,3-dihydro-1H-benzo[d][1,3,2]diazaborole was prepared (50%, gray solid).  $^1\text{H}$  NMR (400 MHz,  $\text{DMSO}-d_6$ )  $\delta$  = 6.58 (d,  $J$  = 7.6 Hz, 1H), 6.65 (d,  $J$  = 7.6 Hz, 2H), 6.74 (dd,  $J$  = 5.6 Hz, 3.2 Hz, 2H), 6.93 (dd,  $J$  = 5.6 Hz, 3.2 Hz, 2H), 7.13 (t,  $J$  = 7.2 Hz, 3H), 7.22 (s, 1H),

7.38-7.43 (m, 3H), 7.99-8.10 (m, 5H), 9.05 (s, 2H).  $^{13}\text{C}$  NMR (100 MHz,  $\text{DMSO}-d_6$ )  $\delta$  = 65.5, 110.7, 114.5, 117.3, 118.2, 120.2, 120.6, 120.7, 123.4, 123.6, 127.9, 128.0, 128.2, 128.3, 133.3, 137.1, 141.2, 141.4, 142.5, 147.7, 148.4, 148.8. HRMS ( $\text{ESI}^+$ ): calcd for  $\text{C}_{31}\text{H}_{22}\text{BN}_2^+ [\text{M}+\text{H}]^+$  433.1871, found 433.1869.

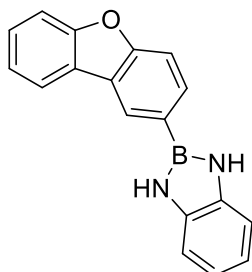

### 2-(Dibenzo[*b,d*]furan-2-yl)-2,3-dihydro-1*H*-benzo[*d*][1,3,2]diazaborole (3h)

Following the general procedure, 2-(dibenzo[*b,d*]furan-2-yl)-2,3-dihydro-1*H*-benzo[*d*][1,3,2]diazaborole was prepared (77%, white solid).  $^1\text{H}$  NMR (400 MHz,  $\text{CDCl}_3$ )  $\delta$  = 6.88 (s, 2H), 6.99 (dd,  $J$  = 5.6 Hz, 3.2 Hz, 2H), 7.16 (dd,  $J$  = 5.6 Hz, 3.2 Hz, 2H), 7.39 (t,  $J$  = 7.6 Hz, 1H), 7.49 (t,  $J$  = 8.4 Hz, 1H), 7.62 (dd,  $J$  = 15.2 Hz, 8.4 Hz, 2H), 7.83 (d,  $J$  = 8.0 Hz, 1H), 8.01 (d,  $J$  = 7.6 Hz, 1H), 8.35 (s, 1H).  $^{13}\text{C}$  NMR (100 MHz,  $\text{CDCl}_3$ )  $\delta$  = 111.3, 111.8, 111.9, 119.5, 120.8, 123.1, 124.1, 124.5, 125.6, 127.4, 132.2, 136.5, 156.4, 157.5. HRMS ( $\text{ESI}^+$ ): calcd for  $\text{C}_{18}\text{H}_{14}\text{BN}_2\text{O}^+ [\text{M}+\text{H}]^+$  285.1194, found 285.1195.

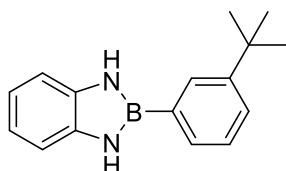

### 2-(3-(*tert*-Butyl)phenyl)-2,3-dihydro-1*H*-benzo[*d*][1,3,2]diazaborole (3l)

Following the general procedure, 2-(3-(*tert*-butyl)phenyl)-2,3-dihydro-1*H*-benzo[*d*][1,3,2]diazaborole was prepared (72%, white solid).  $^1\text{H}$  NMR (400 MHz,  $\text{CDCl}_3$ )  $\delta$  = 1.43 (s, 9H), 6.83 (s, 2H), 7.00-7.04 (m, 2H), 7.14-7.19 (m, 2H), 7.42 (t,  $J$  = 7.2 Hz, 1H), 7.53 (d,  $J$  = 8.0 Hz, 1H), 7.59 (d,  $J$  = 7.2 Hz, 1H), 7.81 (s, 1H).  $^{13}\text{C}$  NMR (100 MHz,  $\text{CDCl}_3$ )  $\delta$  = 31.6, 34.8, 111.2, 119.4, 127.0, 128.1, 129.9, 130.4, 136.5, 150.8. HRMS ( $\text{ESI}^+$ ): calcd for  $\text{C}_{16}\text{H}_{20}\text{BN}_2^+ [\text{M}+\text{H}]^+$  251.1714, found 251.1708.



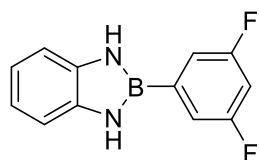

### 2-(2,4-Difluorophenyl)-2,3-dihydro-1H-benzo[d][1,3,2]diazaborole (3m)

Following the general procedure, 2-(2,4-difluorophenyl)-2,3-dihydro-1H-benzo[d][1,3,2]diazaborole was prepared (63%, white solid).  $^1\text{H}$  NMR (400 MHz,  $\text{CDCl}_3$ )  $\delta$  = 6.87 (td,  $J$  = 9.6 Hz, 2.4 Hz, 1H), 6.94-7.01 (m, 5H), 7.15 (dd,  $J$  = 5.6 Hz, 3.2 Hz, 2H), 7.65 (dd,  $J$  = 15.2 Hz, 6.8 Hz, 1H).  $^{13}\text{C}$  NMR (100 MHz,  $\text{CDCl}_3$ )  $\delta$  = 104.01 (dd,  $J_{\text{C-F}}$  = 27.8 Hz, 24.3 Hz), 111.4, 111.82 (dd,  $J_{\text{C-F}}$  = 20.2 Hz, 3.3 Hz), 119.7, 135.73 (dd,  $J_{\text{C-F}}$  = 10.9 Hz, 9.6 Hz), 163.3, 164.6 (dd,  $J_{\text{C-F}}$  = 250.1 Hz, 13.0 Hz). HRMS (ESI $^+$ ): calcd for  $\text{C}_{12}\text{H}_9\text{BF}_2\text{N}_2\text{Na}^+$   $[\text{M}+\text{H}]^+$  253.0719, found 253.0722.

### ii) Optimization of the oxidative cyclization reaction of 2-(4-tolyl)diazaborole

A flame-dried Schlenk tube with a magnetic stir bar was charged with 2-(*p*-tolyl)-2,3-dihydro-1H-benzo[d][1,3,2]diazaborole (**1a**, 0.2 mmol) and additive. The system was evacuated thrice and back filled with  $\text{N}_2$ . Next, the solvent was added *via* a syringe and the rubber septum was replaced with a glass stopper under  $\text{N}_2$ . Then the reaction mixture was stirred at the indicated temperature for 2-24 h in an oil bath. After the reaction mixture was cooled to ambient temperature, the solvent was removed under reduced pressure. The residue was diluted with 10 mL of  $\text{CH}_2\text{Cl}_2$ , filtered through a celite pad, and then washed with 20-30 mL of  $\text{CH}_2\text{Cl}_2$ . The combined filtrates were concentrated and purified *via* column chromatography on silica gel (100-200 mesh) to provide the desired product **4a**.

**Table S1. Optimization of the oxidative cyclization reaction of 2-(4-tolyl)diazaborole<sup>a</sup>**

| <div style="text-align: center;"> </div> |          |         |                  |          |                        |
|------------------------------------------|----------|---------|------------------|----------|------------------------|
| Entry                                    | Oxidants | Solvent | Temperature (°C) | Time (h) | Yield <sup>b</sup> (%) |
| 1                                        | AgOAc    | DMSO    | 80               | 12       | 30                     |
| 2                                        | AgOAc    | DCE     | 80               | 12       | trace                  |
| 3                                        | AgOAc    | DMF     | 80               | 12       | 24                     |

|                 |                                              |                           |     |    |       |
|-----------------|----------------------------------------------|---------------------------|-----|----|-------|
| 4               | AgOAc                                        | MeCN                      | 80  | 12 | trace |
| 5               | AgOAc                                        | Toluene                   | 80  | 12 | trace |
| 6               | AgOAc                                        | THF                       | 80  | 12 | 30    |
| 7               | AgOAc                                        | Dioxane                   | 80  | 12 | 20    |
| 8               | AgOAc                                        | <i>tert</i> -Amyl alcohol | 80  | 12 | N.D.  |
| 9               | MnO <sub>2</sub>                             | DMSO                      | 80  | 12 | 10    |
| 10              | BQ                                           | DMSO                      | 80  | 12 | N.D.  |
| 11              | Ag <sub>2</sub> O                            | DMSO                      | 80  | 12 | 72    |
| 12              | Cu(OAc) <sub>2</sub>                         | DMSO                      | 80  | 12 | N.D.  |
| 13              | K <sub>2</sub> S <sub>2</sub> O <sub>8</sub> | DMSO                      | 80  | 12 | N.D.  |
| 14              | Ag <sub>2</sub> CO <sub>3</sub>              | DMSO                      | 80  | 12 | 33    |
| 15              | PhI(OAc) <sub>2</sub>                        | DMSO                      | 80  | 12 | trace |
| 16              | AgTFA                                        | DMSO                      | 80  | 12 | N.D.  |
| 19 <sup>c</sup> | Ag <sub>2</sub> O                            | DMSO                      | 80  | 12 | 55    |
| 20 <sup>d</sup> | Ag <sub>2</sub> O                            | DMSO                      | 80  | 12 | 38    |
| 21              | Ag <sub>2</sub> O                            | DMSO                      | 60  | 12 | 20    |
| 22              | Ag <sub>2</sub> O                            | DMSO                      | 120 | 12 | 60    |
| 23              | Ag <sub>2</sub> O                            | DMSO                      | 80  | 24 | 87    |
| 17 <sup>e</sup> | Ag <sub>2</sub> O                            | DMSO                      | 80  | 24 | 57    |
| 18 <sup>f</sup> | AgOAc                                        | DMSO                      | 80  | 24 | 53    |

<sup>a</sup>Reaction conditions: 2-(4-tolyl)diazaborole (**1a**, 0.2 mmol), oxidant (4.0 equiv) and solvent (2.0 mL) at 80 °C for 12 h under N<sub>2</sub>. <sup>b</sup>isolated yields. <sup>c</sup>O<sub>2</sub> 1 atm. <sup>d</sup>Air. <sup>e</sup>Ag<sub>2</sub>O (3.0 equiv). <sup>f</sup>AgOAc (8.0 equiv). BQ = 1,4-benzoquinone, DMSO = dimethylsulfoxide, DMF = *N,N*-dimethylformamide, THF = tetrahydrofuran, N.D. = no detection.

### iii) General procedure for the oxidative cyclization reaction of 2-aryl diazaboroles

A dried Schlenk tube with a magnetic stir bar was charged with several of 2-aryl diazaboroles (0.2 mmol), Ag<sub>2</sub>O (4.0 equiv). The system was evacuated thrice and back filled with N<sub>2</sub>. Next, the solvent DMSO (2 mL) was added *via* a syringe and the rubber septum was replaced with a stopper under N<sub>2</sub>. Then the reaction mixture was stirred at the 80 °C for 24 h in an oil bath. After the reaction mixture was cooled to ambient temperature, the solvent was removed under reduced pressure. The residue was dissolved in 10 mL of CH<sub>2</sub>Cl<sub>2</sub>, filtered through a celite pad, and then washed with 20-30 mL of CH<sub>2</sub>Cl<sub>2</sub>. The combined filtrates were concentrated and purified *via* column chromatography on silica gel (100-200 mesh) to provide the desired products.

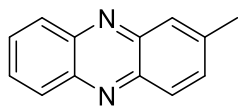

### 2-Methylphenazine (4a)

Following the general procedure, the mixture of 2-(*p*-tolyl)-2,3-dihydro-1*H*-benzo[*d*][1,3,2]diazaborole **1a** (41.6 mg, 0.2 mmol), Ag<sub>2</sub>O (185.4 mg, 4.0 equiv), DMSO (2 mL) was stirred at 80 °C for 24 h. Purification *via* column chromatography on silica gel (petroleum ether/ethyl acetate = 10/1, v/v) afforded the product **4a** (34.1 mg) in 88% yield as a yellow solid. M.p.: 112-114 °C. <sup>1</sup>H NMR (400 MHz, CDCl<sub>3</sub>) δ = 2.65 (s, 3H), 7.66-7.69 (m, 1H), 7.80-7.83 (m, 2H), 7.99 (s, 1H), 8.13 (d, *J* = 8.8 Hz, 1H), 8.21-8.24 (m, 2H). <sup>13</sup>C NMR (100 MHz, CDCl<sub>3</sub>) δ = 22.4, 127.8, 129.2, 129.6, 129.8, 130.1, 130.5, 133.7, 141.4, 142.5, 143.1, 143.6, 143.8. HRMS (ESI<sup>+</sup>): calcd for C<sub>13</sub>H<sub>11</sub>N<sub>2</sub><sup>+</sup> [M+H]<sup>+</sup> 195.0917, found 195.0926.

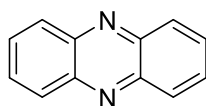

### Phenazine (4b)

Following the general procedure, the mixture of 2-phenyl-2,3-dihydro-1*H*-benzo[*d*][1,3,2]diazaborole **1b** (38.8 mg, 0.2 mmol), Ag<sub>2</sub>O (185.4 mg, 4.0 equiv), DMSO (2 mL) was stirred at 80 °C for 24 h. Purification *via* column chromatography on silica gel (petroleum ether/ethyl acetate = 10/1, v/v) afforded the product **4b** (24.5 mg) in 68% yield as a yellow solid. M.p.: 161-163 °C. <sup>1</sup>H NMR (400 MHz, CDCl<sub>3</sub>) δ = 7.85 (dd, *J* = 6.8 Hz, 3.6 Hz, 4H), 8.26 (dd, *J* = 6.8 Hz, 3.6 Hz, 4H). <sup>13</sup>C NMR (100 MHz, CDCl<sub>3</sub>) δ = 129.8, 130.6, 143.6. HRMS (ESI<sup>+</sup>): calcd for C<sub>12</sub>H<sub>9</sub>N<sub>2</sub><sup>+</sup> [M+H]<sup>+</sup> 181.0760, found 181.0762.

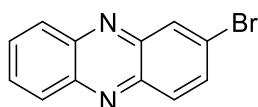

### 2-Bromophenazine (4c)

Following the general procedure, the mixture of 2-(4-bromophenyl)-2,3-dihydro-1*H*-benzo[*d*][1,3,2]diazaborole **1c** (54.4 mg, 0.2 mmol), Ag<sub>2</sub>O (185.4 mg, 4.0 equiv), DMSO (2 mL) was stirred at 80 °C for 24 h. Purification *via* column chromatography

on silica gel (petroleum ether/ethyl acetate = 10/1, v/v) afforded the product **4c** (45.4 mg) in 88% yield as a yellow solid. M.p.: 156-158 °C. <sup>1</sup>H NMR (400 MHz, CDCl<sub>3</sub>)  $\delta$  = 7.86-7.91 (m, 3H), 8.12 (d,  $J$  = 9.6 Hz, 1H), 8.22-8.25 (m, 2H), 8.46 (d,  $J$  = 2.0 Hz, 1H). <sup>13</sup>C NMR (100 MHz, CDCl<sub>3</sub>)  $\delta$  = 125.1, 129.8, 129.9, 131.0, 131.1, 131.3, 131.8, 134.4, 142.2, 143.7, 143.8, 143.9. HRMS (ESI<sup>+</sup>): calcd for C<sub>12</sub>H<sub>8</sub>BrN<sub>2</sub><sup>+</sup> [M+H]<sup>+</sup> 258.9865, 260.9845, found 258.9862, 260.9839.

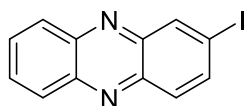

### 2-Iodophenazine (4d)

Following the general procedure, the mixture of 2-(4-iodophenyl)-2,3-dihydro-1*H*-benzo[*d*][1,3,2]diazaborole **1d** (64.0 mg, 0.2 mmol), Ag<sub>2</sub>O (185.4 mg, 4.0 equiv), DMSO (2 mL) was stirred at 80 °C for 24 h. Purification *via* column chromatography on silica gel (petroleum ether/ethyl acetate = 10/1, v/v) afforded the product **4d** (37.4 mg) in 61% yield as a yellow solid. M.p.: 172-174 °C. <sup>1</sup>H NMR (400 MHz, CDCl<sub>3</sub>)  $\delta$  = 7.84-7.87 (m, 2H), 7.94 (d,  $J$  = 9.2 Hz, 1H), 8.02-8.04 (m, 1H), 8.20-8.23 (m, 2H), 8.71 (s, 1H). <sup>13</sup>C NMR (100 MHz, CDCl<sub>3</sub>)  $\delta$  = 97.3, 129.86, 129.91, 130.8, 131.1, 131.3, 138.9, 139.2, 142.5, 143.7, 143.8, 144.0. HRMS (ESI<sup>+</sup>): calcd for C<sub>12</sub>H<sub>8</sub>IN<sub>2</sub><sup>+</sup> [M+H]<sup>+</sup> 306.9727, found 306.9729.

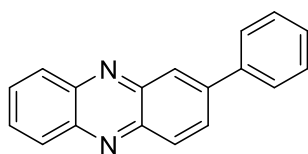

### 2-Phenylphenazine (4e)

Following the general procedure, the mixture of 2-([1,1'-biphenyl]-4-yl)-2,3-dihydro-1*H*-benzo[*d*][1,3,2]diazaborole **1e** (54.0 mg, 0.2 mmol), Ag<sub>2</sub>O (185.4 mg, 4.0 equiv), DMSO (2 mL) was stirred at 80 °C for 24 h. Purification *via* column chromatography on silica gel (petroleum ether/ethyl acetate = 10/1, v/v) afforded the product **4e** (41.5 mg) in 81% yield as a yellow solid. M.p.: 157-159 °C. <sup>1</sup>H NMR (400 MHz, CDCl<sub>3</sub>)  $\delta$  = 7.44-7.48 (m, 1H), 7.53-7.57 (m, 2H), 7.83-7.86 (m, 4H), 8.15 (dd,  $J$  = 8.8 Hz, 2.0 Hz, 1H), 8.24-8.27 (m, 2H), 8.32 (dd,  $J$  = 9.6 Hz, 0.8 Hz, 1H), 8.46 (dd,  $J$  = 2.4 Hz,

0.4Hz, 1H).  $^{13}\text{C}$  NMR (100 MHz,  $\text{CDCl}_3$ )  $\delta$  = 126.6, 127.5, 127.7, 128.7, 129.3, 129.7, 129.8, 130.1, 130.5, 130.7, 130.9, 139.6, 143.1, 143.6, 143.8, 144.0. HRMS ( $\text{ESI}^+$ ): calcd for  $\text{C}_{18}\text{H}_{13}\text{N}_2^+$   $[\text{M}+\text{H}]^+$  257.1073, found 257.1072.

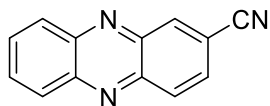

#### Phenazine-2-carbonitrile (**4f**)

Following the general procedure, the mixture of 4-(1,3-dihydro-2H-benzo[d][1,3,2]diazaborol-2-yl)benzonitrile **1f** (43.8 mg, 0.2 mmol),  $\text{Ag}_2\text{O}$  (185.4 mg, 4.0 equiv), DMSO (2 mL) was stirred at 80 °C for 24 h. Purification *via* column chromatography on silica gel (petroleum ether/ethyl acetate = 10/1, v/v) afforded the product **4f** (40.6 mg) in 99% yield as a yellow solid. M.p.: 215-217 °C.  $^1\text{H}$  NMR (400 MHz,  $\text{CDCl}_3$ )  $\delta$  = 7.91-7.96 (m, 3H), 8.26-8.29 (m, 2H), 8.35 (dd,  $J$  = 9.2 Hz, 0.8 Hz, 1H), 8.68 (dd,  $J$  = 2.0 Hz, 0.8 Hz, 1H).  $^{13}\text{C}$  NMR (100 MHz,  $\text{CDCl}_3$ )  $\delta$  = 114.0, 118.2, 129.8, 130.0, 130.2, 131.7, 132.0, 132.6, 136.8, 142.1, 144.0, 144.7, 144.8. HRMS ( $\text{ESI}^+$ ): calcd for  $\text{C}_{13}\text{H}_8\text{N}_3^+$   $[\text{M}+\text{H}]^+$  206.0713, found 206.0713.

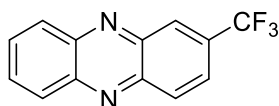

#### 2-(Trifluoromethyl)phenazine (**4g**)

Following the general procedure, the mixture of 2-(4-(trifluoromethyl)phenyl)-2,3-dihydro-1H-benzo[d][1,3,2]diazaborole **1g** (52.4 mg, 0.2 mmol),  $\text{Ag}_2\text{O}$  (185.4 mg, 4.0 equiv), DMSO (2 mL) was stirred at 80 °C for 24 h. Purification *via* column chromatography on silica gel (petroleum ether/ethyl acetate = 10/1, v/v) afforded the product **4g** (44.6 mg) in 90% yield as a yellow solid. M.p.: 190-192 °C.  $^1\text{H}$  NMR (400 MHz,  $\text{CDCl}_3$ )  $\delta$  = 7.88-7.94 (m, 2H), 7.97 (dd,  $J$  = 9.2 Hz, 2.0 Hz, 1H), 8.26-8.28 (m, 2H), 8.37 (d,  $J$  = 9.2 Hz, 1H), 8.59 (s, 1H).  $^{13}\text{C}$  NMR (100 MHz,  $\text{CDCl}_3$ )  $\delta$  = 123.7 (d,  $J_{\text{CF}}$  = 271 Hz), 125.7 (q,  $J_{\text{CF}}$  = 3 Hz), 128.2 (q,  $J_{\text{CF}}$  = 5 Hz), 129.9, 130.0, 131.4, 131.5, 132.0 (d,  $J_{\text{CF}}$  = 33 Hz), 132.1, 142.1, 143.9, 144.3, 144.6.  $^{19}\text{F}$  NMR (376 MHz,  $\text{CDCl}_3$ )  $\delta$  = -63.28 (s). HRMS ( $\text{ESI}^+$ ): calcd for  $\text{C}_{13}\text{H}_8\text{F}_3\text{N}_2^+$   $[\text{M}+\text{H}]^+$  249.0634, found 249.0635.

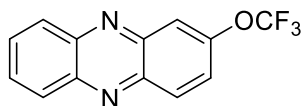

#### 2-(Trifluoromethoxy)phenazine (4h)

Following the general procedure, the mixture of 2-(4-(trifluoromethoxy)phenyl)-2,3-dihydro-1*H*-benzo[*d*][1,3,2]diazaborole **1h** (55.6 mg, 0.2 mmol), Ag<sub>2</sub>O (185.4 mg, 4.0 equiv), DMSO (2 mL) was stirred at 80 °C for 24 h. Purification *via* column chromatography on silica gel (petroleum ether/ethyl acetate = 10/1, v/v) afforded the product **4h** (45.0 mg) in 85% yield as a yellow solid. M.p.: 136-138 °C. <sup>1</sup>H NMR (400 MHz, CDCl<sub>3</sub>)  $\delta$  = 7.69 (dd, *J* = 9.6 Hz, 2.8 Hz, 1H), 7.85-7.91 (m, 2H), 8.07 (dd, *J* = 2.4 Hz, 1.2 Hz, 1H), 8.22-8.26 (m, 2H), 8.30 (d, *J* = 9.6 Hz, 1H). <sup>13</sup>C NMR (100 MHz, CDCl<sub>3</sub>)  $\delta$  = 117.7, 120.6 (d, *J*<sub>CF</sub> = 258 Hz), 125.3, 129.6, 129.9, 131.0, 131.5, 132.0, 141.7, 143.4, 143.6, 144.0, 150.1. <sup>19</sup>F NMR (376 MHz, CDCl<sub>3</sub>)  $\delta$  = -57.83 (s). HRMS (ESI<sup>+</sup>): calcd for C<sub>13</sub>H<sub>8</sub>F<sub>3</sub>ON<sub>2</sub><sup>+</sup> [M+H]<sup>+</sup> 265.0583, found 265.0581.

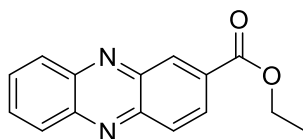

#### Ethyl phenazine-2-carboxylate (4i)

Following the general procedure, the mixture of ethyl 4-(1,3-dihydro-2*H*-benzo[*d*][1,3,2]diazaborol-2-yl)benzoate **1i** (53.2 mg, 0.2 mmol), Ag<sub>2</sub>O (185.4 mg, 4.0 equiv), DMSO (2 mL) was stirred at 80 °C for 24 h. Purification *via* column chromatography on silica gel (petroleum ether/ethyl acetate = 10/1, v/v) afforded the product **4i** (38.0 mg) in 75% yield as a yellow solid. M.p.: 129-131 °C. <sup>1</sup>H NMR (400 MHz, CDCl<sub>3</sub>)  $\delta$  = 1.48 (t, *J* = 7.2 Hz, 3H), 4.50 (q, *J* = 7.2 Hz, 2H), 7.86-7.92 (m, 2H), 8.24-8.30 (m, 3H), 8.40 (dd, *J* = 9.2 Hz, 2.0 Hz, 1H), 9.01 (dd, *J* = 1.6 Hz, 0.4 Hz, 1H). <sup>13</sup>C NMR (100 MHz, CDCl<sub>3</sub>)  $\delta$  = 14.5, 61.9, 129.5, 129.9, 130.0, 130.1, 131.1, 131.8, 132.1, 133.0, 142.7, 144.3, 144.5, 144.8, 165.9. HRMS (ESI<sup>+</sup>): calcd for C<sub>15</sub>H<sub>13</sub>N<sub>2</sub>O<sub>2</sub><sup>+</sup> [M+H]<sup>+</sup> 253.0972, found 253.0979.

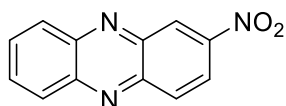

### 2-Nitrophenazine (4j)

Following the general procedure, the mixture of 2-(4-nitrophenyl)-2,3-dihydro-1*H*-benzo[*d*][1,3,2]diazaborole **1j** (47.8 mg, 0.2 mmol), Ag<sub>2</sub>O (185.4 mg, 4.0 equiv), DMSO (2 mL) was stirred at 80 °C for 24 h. Purification *via* column chromatography on silica gel (petroleum ether/ethyl acetate/DCM = 10/1/1, v/v) afforded the product **4j** (14.9 mg) in 33% yield as a yellow solid. M.p.: 212-214 °C. <sup>1</sup>H NMR (400 MHz, CDCl<sub>3</sub>)  $\delta$  = 7.93-8.00 (m, 2H), 8.28-8.33 (m, 2H), 8.41 (d, *J* = 9.6 Hz, 1H), 8.58 (dd, *J* = 9.6 Hz, 2.4 Hz, 1H), 9.22 (d, *J* = 2.4 Hz, 1H). <sup>13</sup>C NMR (100 MHz, CDCl<sub>3</sub>)  $\delta$  = 123.4, 126.9, 130.1, 130.2, 131.8, 132.1, 132.9, 141.8, 142.4, 144.8, 144.97, 145.05. HRMS (ESI<sup>+</sup>): calcd for C<sub>12</sub>H<sub>8</sub>N<sub>3</sub>O<sub>2</sub><sup>+</sup> [M+H]<sup>+</sup> 226.0611, found 226.0609.

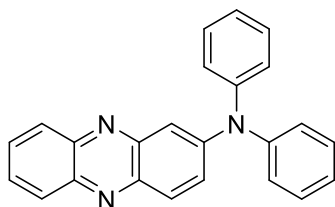

### *N,N*-Diphenylphenazin-2-amine (4k)

Following the general procedure, the mixture of 4-(1,3-dihydro-2*H*-benzo[*d*][1,3,2]diazaborol-2-yl)-*N,N*-diphenylaniline **1k** (72.2 mg, 0.2 mmol), Ag<sub>2</sub>O (185.4 mg, 4.0 equiv), DMSO (2 mL) was stirred at 80 °C for 24 h. Purification *via* column chromatography on silica gel (petroleum ether/ethyl acetate = 10/1, v/v) afforded the product **4k** (55.6 mg) in 80% yield as an orange solid. M.p.: 155-157 °C. <sup>1</sup>H NMR (400 MHz, DMSO-*d*<sub>6</sub>)  $\delta$  = 7.14 (d, *J* = 2.4 Hz, 1H), 7.26-7.30 (m, 6H), 7.45-7.49 (m, 4H), 7.58 (dd, *J* = 9.6 Hz, 2.4 Hz, 1H), 7.77-7.87 (m, 2H), 8.01-8.08 (m, 2H), 8.15 (d, *J* = 8.4 Hz, 1H). <sup>13</sup>C NMR (100 MHz, DMSO-*d*<sub>6</sub>)  $\delta$  = 111.8, 125.6, 126.2, 127.6, 128.5, 129.1, 129.3, 130.0, 130.1, 130.8, 140.3, 141.3, 143.2, 144.4, 145.7, 149.3. HRMS (ESI<sup>+</sup>): calcd for C<sub>24</sub>H<sub>18</sub>N<sub>3</sub><sup>+</sup> [M+H]<sup>+</sup> 348.1495, found 348.1498.

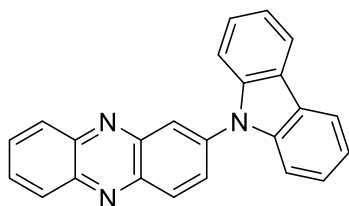

### 2-(9*H*-Carbazol-9-yl)phenazine (4l)

Following the general procedure, the mixture of 9-(4-(1,3-dihydro-2*H*-benzo[*d*][1,3,2]diazaborol-2-yl)phenyl)-9*H*-carbazole **1l** (71.8 mg, 0.2 mmol), Ag<sub>2</sub>O (185.4 mg, 4.0 equiv), DMSO (2 mL) was stirred at 80 °C for 24 h. Purification *via* column chromatography on silica gel (petroleum ether/ethyl acetate = 10/1, v/v) afforded the product **4l** (44.2 mg) in 64% yield as an orange solid. M.p.: 191-193 °C. <sup>1</sup>H NMR (400 MHz, CDCl<sub>3</sub>)  $\delta$  = 7.35-7.38 (m, 2H), 7.45-7.49 (m, 2H), 7.68 (d, *J* = 8.4 Hz, 2H), 7.89-7.92 (m, 2H), 8.15 (dd, *J* = 9.2 Hz, 2.4 Hz, 1H), 8.19 (d, *J* = 7.6 Hz, 2H), 8.27-8.33 (m, 2H), 8.47 (d, *J* = 8.8 Hz, 1H), 8.50 (d, *J* = 2.4 Hz, 1H). <sup>13</sup>C NMR (100 MHz, CDCl<sub>3</sub>)  $\delta$  = 110.1, 120.7, 121.1, 124.2, 125.1, 126.5, 129.7, 129.9, 130.0, 130.8, 131.3, 131.6, 139.7, 140.3, 142.5, 143.7, 144.06, 144.09. HRMS (ESI<sup>+</sup>): calcd for C<sub>24</sub>H<sub>16</sub>N<sub>3</sub><sup>+</sup> [M+H]<sup>+</sup> 346.1339, found 346.1334.

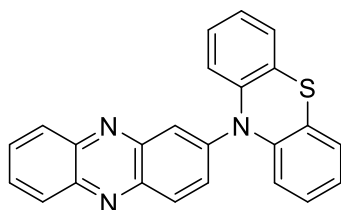

### 10-(Phenazin-2-yl)-10*H*-phenothiazine (4m)

Following the general procedure, the mixture of 10-(4-(1,3-dihydro-2*H*-benzo[*d*][1,3,2]diazaborol-2-yl)phenyl)-10*H*-phenothiazine **1m** (78.2 mg, 0.2 mmol), Ag<sub>2</sub>O (185.4 mg, 4.0 equiv), DMSO (2 mL) was stirred at 80 °C for 24 h. Purification *via* column chromatography on silica gel (petroleum ether/ethyl acetate = 10/1, v/v) afforded the product **4m** (40.0 mg) in 53% yield as an orange solid. M.p.: 210-212 °C. <sup>1</sup>H NMR (400 MHz, CDCl<sub>3</sub>)  $\delta$  = 7.21 (td, *J* = 7.6 Hz, 1.2 Hz, 2H), 7.33 (td, *J* = 7.6 Hz, 1.6 Hz, 2H), 7.41-7.46 (m, 4H), 7.71-7.80 (m, 4H), 8.09-8.12 (m, 2H), 8.16-8.18 (m, 1H). <sup>13</sup>C NMR (100 MHz, CDCl<sub>3</sub>)  $\delta$  = 111.7, 125.4, 125.8, 126.2, 127.7, 128.9, 129.0, 129.2, 129.7, 130.7, 130.8, 132.8, 141.1, 141.6, 142.3, 144.0, 144.9, 146.6. HRMS (ESI<sup>+</sup>): calcd for C<sub>24</sub>H<sub>16</sub>N<sub>3</sub>S<sup>+</sup> [M+H]<sup>+</sup> 378.1059, found 378.1056.



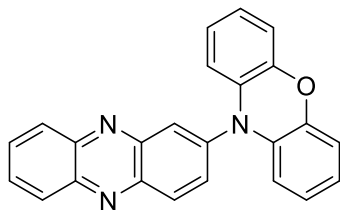

#### 10-(Phenazin-2-yl)-10H-phenoxazine (**4n**)

Following the general procedure, the mixture of 10-(4-(1,3-dihydro-2H-benzo[d][1,3,2]diazaborol-2-yl)phenyl)-10H-phenoxazine **1n** (75.0 mg, 0.2 mmol), Ag<sub>2</sub>O (185.4 mg, 4.0 equiv), DMSO (2 mL) was stirred at 80 °C for 24 h. Purification *via* column chromatography on silica gel (petroleum ether/ethyl acetate = 10/1, v/v) afforded the product **4n** (45.0 mg) in 62% yield as a carmine solid. M.p.: 200-202 °C. <sup>1</sup>H NMR (400 MHz, CDCl<sub>3</sub>) δ = 6.17 (dd, *J* = 8.0 Hz, 1.2 Hz, 2H), 6.62 (td, *J* = 8.0 Hz, 1.6 Hz, 2H), 6.70-6.79 (m, 4H), 7.79 (dd, *J* = 9.2 Hz, 2.4 Hz, 1H), 7.88-7.92 (m, 2H), 8.26-8.33 (m, 3H), 8.45 (d, *J* = 9.2 Hz, 1H). <sup>13</sup>C NMR (100 MHz, CDCl<sub>3</sub>) δ = 113.9, 116.0, 122.4, 123.5, 129.8, 129.9, 131.1, 131.3, 131.6, 132.9, 133.1, 133.4, 140.7, 143.0, 143.7, 143.9, 144.2, 144.4. HRMS (ESI<sup>+</sup>): calcd for C<sub>24</sub>H<sub>16</sub>N<sub>3</sub>O<sup>+</sup> [M+H]<sup>+</sup> 362.1288, found 362.1286.

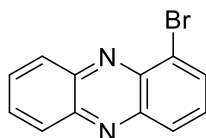

#### 1-Bromophenazine (**4o**)

Following the general procedure, the mixture of 2-(2-bromophenyl)-2,3-dihydro-1H-benzo[d][1,3,2]diazaborole **1o** (54.4 mg, 0.2 mmol), Ag<sub>2</sub>O (185.4 mg, 4.0 equiv), DMSO (2 mL) was stirred at 80 °C for 24 h. Purification *via* column chromatography on silica gel (petroleum ether/ethyl acetate = 10/1, v/v) afforded the product **4o** (34.1 mg) in 66% yield as a yellow solid. M.p.: 131-133 °C. <sup>1</sup>H NMR (400 MHz, CDCl<sub>3</sub>) δ = 7.68-7.72 (m, 1H), 7.87-7.91 (m, 2H), 8.18-8.28 (m, 3H), 8.38-8.41 (m, 1H). <sup>13</sup>C NMR (100 MHz, CDCl<sub>3</sub>) δ = 124.5, 129.5, 129.8, 130.2, 130.5, 131.2, 131.5, 133.7, 141.0, 143.8, 143.9, 144.0. HRMS (ESI<sup>+</sup>): calcd for C<sub>12</sub>H<sub>8</sub>BrN<sub>2</sub><sup>+</sup> [M+H]<sup>+</sup> 258.9865, 260.9845, found 258.9862, 260.9839

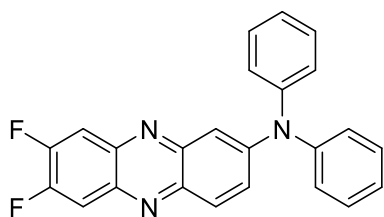

### 7,8-Difluoro-*N,N*-diphenylphenazin-2-amine (**5a**)

Following the general procedure, the mixture of 4-(5,6-difluoro-1,3-dihydro-2*H*-benzo[*d*][1,3,2]diazaborol-2-yl)-*N,N*-diphenylaniline **2a** (79.4 mg, 0.2 mmol), Ag<sub>2</sub>O (185.4 mg, 4.0 equiv), DMSO (2 mL) was stirred at 80 °C for 24 h. Purification *via* column chromatography on silica gel (petroleum ether/ethyl acetate = 10/1, v/v) afforded the product **5a** (59.1 mg) in 77% yield as a red-orange solid. M.p.: 170-172 °C. <sup>1</sup>H NMR (400 MHz, DMSO-*d*<sub>6</sub>)  $\delta$  = 7.08 (d, *J* = 2.8 Hz, 1H), 7.27-7.31 (m, 6H), 7.45-7.49 (m, 4H), 7.57 (dd, *J* = 9.6 Hz, 2.8 Hz, 1H), 7.96-8.04 (m, 2H), 8.15 (dd, *J* = 11.2 Hz, 8.8 Hz, 1H). <sup>13</sup>C NMR (100 MHz, DMSO-*d*<sub>6</sub>)  $\delta$  = 111.0, 113.5, 114.2, 114.3, 125.8, 126.3, 127.7, 129.7, 130.1, 140.08, 140.09, 140.82, 140.84, 144.2, 145.5, 149.6. HRMS (ESI<sup>+</sup>): calcd for C<sub>24</sub>H<sub>16</sub>F<sub>2</sub>N<sub>3</sub><sup>+</sup> [M+H]<sup>+</sup> 384.1307, found 384.1307.

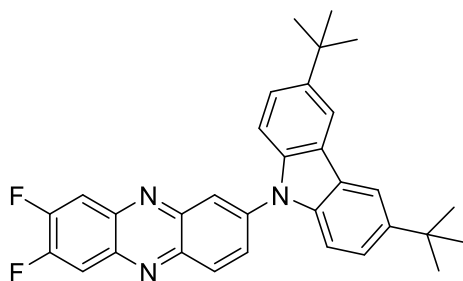

### 7-(3,6-Di-*tert*-butyl-9*H*-carbazol-9-yl)-2,3-difluorophenazine (**5b**)

Following the general procedure, the mixture of 3,6-di-*tert*-butyl-9-(4-(5,6-difluoro-1,3-dihydro-2*H*-benzo[*d*][1,3,2]diazaborol-2-yl)phenyl)-9*H*-carbazole **2b** (101.4 mg, 0.2 mmol), Ag<sub>2</sub>O (185.4 mg, 4.0 equiv), DMSO (2 mL) was stirred at 80 °C for 24 h. Purification *via* column chromatography on silica gel (petroleum ether/ethyl acetate = 10/1, v/v) afforded the product **5b** (49.3 mg) in 50% yield as a orange solid. M.p.: > 250 °C. <sup>1</sup>H NMR (400 MHz, CDCl<sub>3</sub>)  $\delta$  = 1.49 (s, 18H), 7.51 (d, *J* = 8.8 Hz, 2H), 7.61 (d, *J* = 8.8 Hz, 2H), 7.93-8.02 (m, 2H), 8.18 (s, 3H), 8.37-8.41 (m, 2H). <sup>13</sup>C NMR (100

MHz, CDCl<sub>3</sub>)  $\delta$  = 32.1, 35.0, 109.5, 114.2 ( $J_{C-F}$  = 30 Hz, 17 Hz), 116.7, 123.7, 124.2, 124.3, 130.3, 131.1, 138.5, 140.6, 140.9, 141.0, 141.6, 141.7, 142.1 ( $J_{C-F}$  = 2 Hz), 144.0 ( $J_{C-F}$  = 3 Hz), 144.3. HRMS (ESI<sup>+</sup>): calcd for C<sub>32</sub>H<sub>30</sub>F<sub>2</sub>N<sub>3</sub><sup>+</sup> [M+H]<sup>+</sup> 494.2402, found 494.2401.

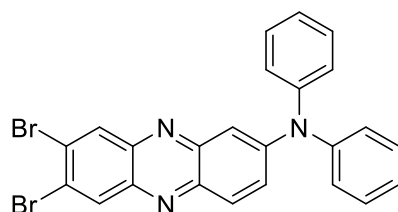

### 7,8-Dibromo-*N,N*-diphenylphenazin-2-amine (**5c**)

Following the general procedure, the mixture of 4-(5,6-dibromo-1,3-dihydro-2*H*-benzo[*d*][1,3,2]diazaborol-2-yl)-*N,N*-diphenylaniline **3c** (103.4 mg, 0.2 mmol), Ag<sub>2</sub>O (185.4 mg, 4.0 equiv), DMSO (2 mL) was stirred at 80 °C for 24 h. Purification *via* column chromatography on silica gel (petroleum ether/ethyl acetate = 10/1, v/v) afforded the product **5c** (81.5 mg) in 81% yield as a red-orange solid. M.p.: 197-199 °C. <sup>1</sup>H NMR (400 MHz, CDCl<sub>3</sub>)  $\delta$  = 7.20-7.24 (m, 5H), 7.35-7.40 (m, 6H), 7.66 (dd,  $J$  = 9.6 Hz, 2.4 Hz, 1H), 7.93 (d,  $J$  = 9.6 Hz, 1H), 8.35 (s, 1H), 8.46 (s, 1H). <sup>13</sup>C NMR (100 MHz, CDCl<sub>3</sub>)  $\delta$  = 112.6, 124.9, 125.7, 126.5, 127.2, 129.1, 130.0, 130.1, 132.6, 133.4, 140.8, 141.8, 142.9, 145.7, 146.0, 150.5. HRMS (ESI<sup>+</sup>): calcd for C<sub>24</sub>H<sub>16</sub>Br<sub>2</sub>N<sub>3</sub><sup>+</sup> [M+H]<sup>+</sup> 503.9705, 505.9685, 507.9665, found 503.9702, 505.9685, 507.9655.

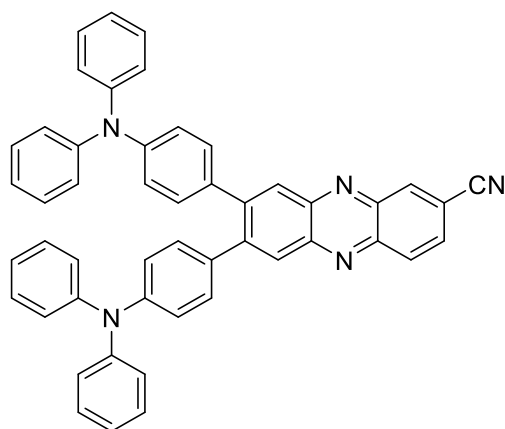

### 7,8-Bis(4-(diphenylamino)phenyl)phenazine-2-carbonitrile (**5d**)

Following the general procedure, the mixture of 4-(5,6-bis(4-(diphenylamino)phenyl)-1,3-dihydro-2*H*-benzo[*d*][1,3,2]diazaborol-2-yl)benzonitrile **4d** (141.1 mg, 0.2 mmol), Ag<sub>2</sub>O (185.4 mg, 4.0 equiv), DMSO (2 mL) was stirred at 80 °C for 24 h. Purification *via* column chromatography on silica gel (petroleum ether/DCM = 3/1, v/v) afforded the product **5d** (70.5 mg) in 51% yield as a deepred solid. M.p.: > 250 °C. <sup>1</sup>H NMR (400 MHz, CDCl<sub>3</sub>) δ = 7.01-7.09 (m, 8H), 7.13-7.18 (m, 12H), 7.26-7.30 (m, 8H), 7.89 (dd, *J* = 9.2 Hz, 2.0 Hz, 1H), 8.26 (*d*, *J* = 2.0 Hz, 2H), 8.31-8.33 (m, 1H), 8.65-8.66 (m, 1H). <sup>13</sup>C NMR (100 MHz, CDCl<sub>3</sub>) δ = 113.4, 118.4, 122.2, 122.3, 123.5, 123.6, 124.99, 125.04, 129.4, 129.5, 129.6, 129.7, 130.76, 130.78, 131.5, 133.1, 133.2, 136.6, 142.2, 144.22, 144.25, 144.4, 146.0, 146.6, 147.43, 147.45, 147.79, 147.84. HRMS (ESI<sup>+</sup>): calcd for C<sub>49</sub>H<sub>34</sub>N<sub>5</sub><sup>+</sup> [M+H]<sup>+</sup> 692.2809, found 692.2809.

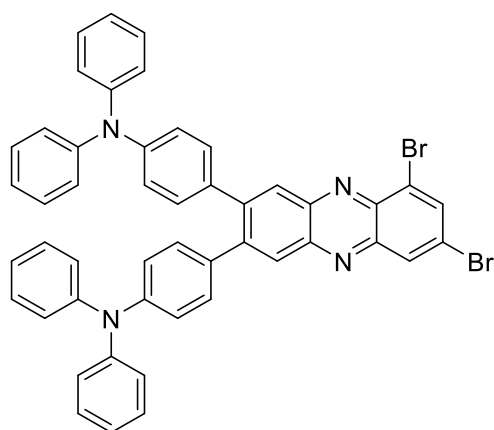

#### 4,4'-(6,8-Dibromophenazine-2,3-diyl)bis(*N,N*-diphenylaniline) (**5e**)

Following the general procedure, the mixture of 4,4'-(2-(3,5-dibromophenyl)-2,3-dihydro-1*H*-benzo[*d*][1,3,2]diazaborole-5,6-diyl)bis(*N,N*-diphenylaniline) **2e** (167.2 mg, 0.2 mmol), Ag<sub>2</sub>O (185.4 mg, 4.0 equiv), DMSO (2 mL) was stirred at 80 °C for 24 h. Purification *via* column chromatography on silica gel (petroleum ether/ethyl acetate = 10/1, v/v) afforded the product **5e** (120.0 mg) in 73% yield as a red solid. M.p.: > 250 °C. <sup>1</sup>H NMR (400 MHz, CDCl<sub>3</sub>) δ = 7.01-7.08 (m, 9H), 7.12-7.18 (m, 13H), 7.28-7.30 (m, 6H), 8.22-8.23 (m, 2H), 8.368-8.370 (m, 1H), 8.395-8.404 (m, 1H). <sup>13</sup>C NMR (100 MHz, CDCl<sub>3</sub>) δ = 122.3, 122.4, 123.4, 123.5, 123.6, 124.9, 125.0, 125.3, 129.0, 129.50, 129.51, 130.0, 130.79, 130.82, 131.6, 133.4, 133.5, 136.3, 139.9, 143.3,

143.7, 144.0, 145.5, 146.0, 147.49, 147.52, 147.6, 147.7. HRMS (ESI<sup>+</sup>): calcd for C<sub>48</sub>H<sub>33</sub>Br<sub>2</sub>N<sub>4</sub><sup>+</sup> [M+H]<sup>+</sup> 825.1046, 826.1080, 823.1066, found 825.1046, 826.1080, 823.1063.

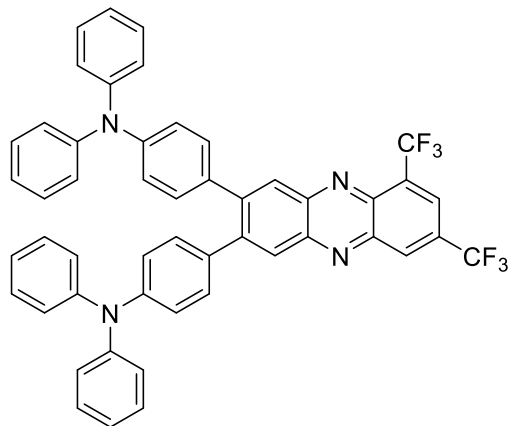

**4,4'-(6,8-Bis(trifluoromethyl)phenazine-2,3-diyl)bis(*N,N*-diphenylaniline) (5f)**

Following the general procedure, the mixture of 4,4'-(2-(3,5-bis(trifluoromethyl)phenyl)-2,3-dihydro-1*H*-benzo[*d*][1,3,2]diazaborole-5,6-diyl)bis(*N,N*-diphenylaniline) **2f** (163.3 mg, 0.2 mmol), Ag<sub>2</sub>O (185.4 mg, 4.0 equiv), DMSO (2 mL) was stirred at 80 °C for 24 h. Purification *via* column chromatography on silica gel (petroleum ether/DCM = 3/1, v/v) afforded the product **5f** (130.0 mg) in 81% yield as a deep red solid. M.p.: > 250 °C. <sup>1</sup>H NMR (400 MHz, CDCl<sub>3</sub>) δ = 7.02-7.09 (m, 8H), 7.13-7.16 (m, 8H), 7.20 (d, *J* = 8.4 Hz, 4H), 7.27-7.31 (m, 8H), 8.28-8.30 (m, 2H), 8.39 (s, 1H), 8.75 (s, 1H). <sup>13</sup>C NMR (100 MHz, CDCl<sub>3</sub>) δ = 122.2, 122.4, 123.5, 123.6, 124.2, 124.6, 124.9, 125.0, 129.3, 129.52, 129.54, 129.7, 130.0, 130.2, 130.8, 132.3, 133.0, 133.2, 140.7, 142.0, 143.9, 144.0, 146.6, 147.0, 147.4, 147.5, 147.8, 147.9. <sup>19</sup>F NMR (376 MHz, CDCl<sub>3</sub>) δ = -63.17 (s), -60.57 (s). HRMS (ESI<sup>+</sup>): calcd for C<sub>50</sub>H<sub>33</sub>F<sub>6</sub>N<sub>4</sub><sup>+</sup> [M+H]<sup>+</sup> 803.2604, found 803.2609.

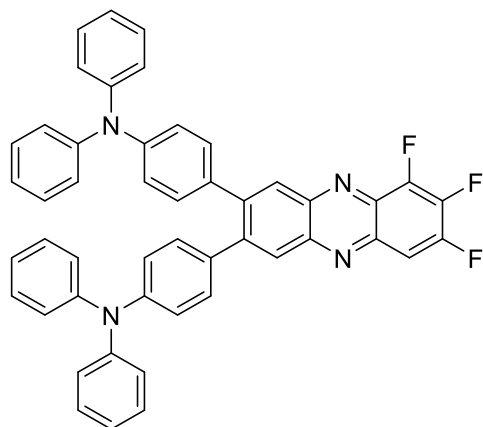

#### 4,4'-(6,7,8-Trifluorophenazine-2,3-diyl)bis(*N,N*-diphenylaniline) (**5g**)

Following the general procedure, the mixture of 4,4'-(2-(3,4,5-trifluorophenyl)-2,3-dihydro-1*H*-benzo[*d*][1,3,2]diazaborole-5,6-diyl)bis(*N,N*-diphenylaniline) **2g** (146.9 mg, 0.2 mmol), Ag<sub>2</sub>O (185.4 mg, 4.0 equiv), DMSO (2 mL) was stirred at 80 °C for 24 h. Purification *via* column chromatography on silica gel (petroleum ether/DCM = 3/1, v/v) afforded the product **5g** (103.7 mg) in 72% yield as a red solid. M.p.: 248-250 °C. <sup>1</sup>H NMR (400 MHz, DMSO-*d*<sub>6</sub>)  $\delta$  = 6.94 (d, *J* = 8.4 Hz, 4H), 7.04-7.07 (m, 11H), 7.18 (dd, *J* = 8.8 Hz, 2.0 Hz, 4H), 7.26-7.30 (m, 8H), 8.12-8.17(m, 1H), 8.19 (s, 1H), 8.25 (d, *J* = 4.4 Hz, 2H). <sup>13</sup>C NMR (100 MHz, CDCl<sub>3</sub>)  $\delta$  = 109.3, 122.27, 122.32, 123.5, 124.97, 124.99, 129.2, 129.4, 129.5, 130.8, 133.2, 133.3, 138.0, 139.3, 139.4, 142.4, 143.6, 145.6, 145.9, 147.5, 147.69, 147.70. HRMS (ESI<sup>+</sup>): calcd for C<sub>48</sub>H<sub>32</sub>F<sub>3</sub>N<sub>4</sub><sup>+</sup> [M+H]<sup>+</sup> 721.2574, found 721.2576.

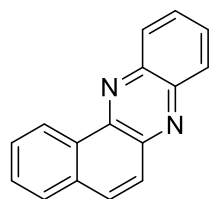

#### Benzo[*a*]phenazine (**5h**)

Following the general procedure, the mixture of 2-(naphthalen-1-yl)-2,3-dihydro-1*H*-benzo[*d*][1,3,2]diazaborole **2h** (48.8 mg, 0.2 mmol), Ag<sub>2</sub>O (185.4 mg, 4.0 equiv), DMSO (2 mL) was stirred at 80 °C for 24 h. Purification *via* column chromatography on silica gel (petroleum ether/ethyl acetate = 5/1, v/v) afforded the product **5h** (40.9 mg) in 89% yield as a yellow solid. M.p.: 141-143 °C. <sup>1</sup>H NMR (400 MHz, CDCl<sub>3</sub>)  $\delta$  =

7.78-7.81 (m, 2H), 7.86-7.92 (m, 3H), 7.95-8.03 (m, 2H), 8.27-8.30 (m, 1H), 8.36-8.39 (m, 1H), 9.41-9.43 (m, 1H).  $^{13}\text{C}$  NMR (100 MHz,  $\text{CDCl}_3$ )  $\delta$  = 125.5, 127.3, 128.1, 128.4, 129.3, 129.87, 129.95, 130.0, 130.2, 131.3, 133.39, 133.42, 142.1, 142.8, 142.9, 143.8. HRMS ( $\text{ESI}^+$ ): calcd for  $\text{C}_{16}\text{H}_{11}\text{N}_2^+$   $[\text{M}+\text{H}]^+$  231.0917, found 231.0915.

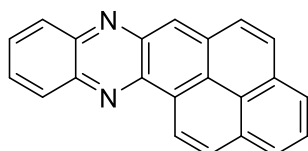

#### Phenaleno[1,9-*ab*]phenazine (**5i**)

Following the general procedure, the mixture of 2-(pyren-1-yl)-2,3-dihydro-1*H*-benzo[*d*][1,3,2]diazaborole **2i** (64.0 mg, 0.2 mmol),  $\text{Ag}_2\text{O}$  (185.4 mg, 4.0 equiv), DMSO (2 mL) was stirred at 80 °C for 24 h. Purification *via* column chromatography on silica gel (petroleum ether/THF/DCM = 10/1/1, v/v) afforded the product **5i** (52.0 mg) in 85% yield as a red solid. M.p.: 241-243 °C.  $^1\text{H}$  NMR (400 MHz,  $\text{CDCl}_3$ )  $\delta$  = 7.82 (d,  $J$  = 9.2 Hz, 1H), 7.86-7.94 (m, 4H), 7.98 (d,  $J$  = 6.4 Hz, 1H), 8.20 (d,  $J$  = 7.2 Hz, 1H), 8.35-8.39 (m, 2H), 8.45-8.48 (m, 1H), 8.55 (s, 1H), 9.69 (d,  $J$  = 8.8 Hz, 1H).  $^{13}\text{C}$  NMR (100 MHz,  $\text{CDCl}_3$ )  $\delta$  = 123.69, 123.71, 124.9, 125.8, 126.0, 127.1, 127.3, 128.0, 128.6, 129.1, 129.4, 129.8, 130.1, 130.3, 130.4, 131.2, 132.8, 134.9, 139.3, 141.3, 142.0, 143.5. HRMS ( $\text{ESI}^+$ ): calcd for  $\text{C}_{22}\text{H}_{13}\text{N}_2^+$   $[\text{M}+\text{H}]^+$  305.1073, found 305.1070.

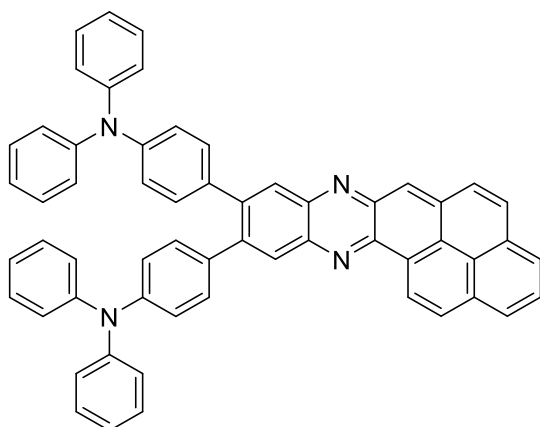

#### 4,4'-(Phenaleno[1,9-*ab*]phenazine-9,10-diyl)bis(*N,N*-diphenylaniline) (**5j**)

Following the general procedure, the mixture of 4,4'-(2-(pyren-1-yl)-2,3-dihydro-1*H*-benzo[*d*][1,3,2]diazaborole-5,6-diyl)bis(*N,N*-diphenylaniline) **2j** (160.9 mg, 0.2 mmol),  $\text{Ag}_2\text{O}$  (185.4 mg, 4.0 equiv), DMSO (2 mL) was stirred at 80 °C for 24 h. Purification

via column chromatography on silica gel (petroleum ether/THF/DCM = 10/1/1, v/v) afforded the product **5j** (99.6 mg) in 63% yield as a red solid. M.p.: > 250 °C. <sup>1</sup>H NMR (400 MHz, CDCl<sub>3</sub>)  $\delta$  = 7.04-7.08 (m, 8H), 7.16 (d, *J* = 8.0 Hz, 8H), 7.23 (dd, *J* = 8.4 Hz, 2.4 Hz, 4H), 7.29 (t, *J* = 7.2 Hz, 8H), 7.84 (d, *J* = 9.2 Hz, 1H), 7.90-7.95 (m, 2H), 8.00 (d, *J* = 7.2 Hz, 1H), 8.22 (d, *J* = 7.6 Hz, 1H), 8.40 (d, *J* = 10.0 Hz, 2H), 8.49 (s, 1H), 8.57 (s, 1H), 9.70 (d, *J* = 8.8 Hz, 1H). <sup>13</sup>C NMR (100 MHz, CDCl<sub>3</sub>)  $\delta$  = 122.6, 122.7, 123.25, 123.29, 123.7, 123.8, 124.76, 124.83, 125.0, 125.7, 126.0, 127.0, 127.2, 128.0, 128.5, 129.1, 129.2, 129.5, 129.6, 130.0, 130.2, 131.0, 131.2, 132.8, 134.2, 134.4, 134.6, 139.5, 141.51, 141.52, 143.0, 143.5, 144.1, 147.2, 147.3, 147.62, 147.65. HRMS (ESI<sup>+</sup>): calcd for C<sub>58</sub>H<sub>39</sub>N<sub>4</sub><sup>+</sup> [M+H]<sup>+</sup> 791.3169, found 791.3170.

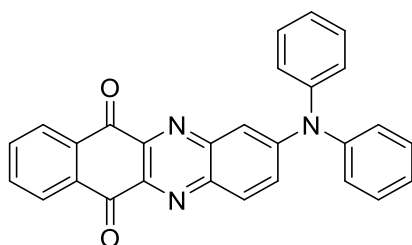

### 2-(Diphenylamino)benzo[b]phenazine-6,11-dione (**5k**)

Following the general procedure, the mixture of 2-(4-(diphenylamino)phenyl)-2,3-dihydro-1*H*-naphtho[2,3-*d*][1,3,2]diazaborole-4,9-dione **2k** (88.2 mg, 0.2 mmol), Ag<sub>2</sub>O (185.4 mg, 4.0 equiv), DMSO (2 mL) was stirred at 80 °C for 24 h. Purification *via* column chromatography on silica gel (petroleum ether/ethyl acetate/DCM = 5/1/1, v/v) afforded the product **5k** (51.3 mg) in 60% yield as a red solid. M.p.: > 250 °C. <sup>1</sup>H NMR (400 MHz, CDCl<sub>2</sub>CDCl<sub>2</sub>)  $\delta$  = 7.32-7.34 (m, 6H), 7.44-7.48(m, 4H), 7.55 (d, *J* = 2.8 Hz, 1H), 7.76 (dd, *J* = 9.6 Hz, 2.8 Hz, 1H), 7.87-7.93 (m, 2H), 8.17 (d, *J* = 9.6 Hz, 1H), 8.39-8.45 (m, 2H). <sup>13</sup>C NMR (100 MHz, CDCl<sub>3</sub>)  $\delta$  = 113.6, 126.6, 126.9, 128.17, 128.20, 128.7, 130.3, 131.6, 133.7, 134.1, 134.8, 135.1, 140.8, 141.4, 145.0, 145.3, 146.2, 152.8, 181.3, 182.0. HRMS (ESI<sup>+</sup>): calcd for C<sub>28</sub>H<sub>18</sub>N<sub>3</sub>O<sub>2</sub><sup>+</sup> [M+H]<sup>+</sup> 428.1394, found 428.1394.

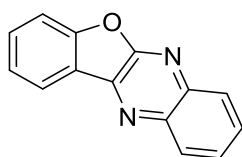



### Benzofuro[2,3-*b*]quinoxaline (**5l**)

Following the general procedure, the mixture of 2-(benzofuran-2-yl)-2,3-dihydro-1*H*-benzo[*d*][1,3,2]diazaborole **2l** (46.8 mg, 0.2 mmol), Ag<sub>2</sub>O (185.4 mg, 4.0 equiv), DMSO (2 mL) was stirred at 80 °C for 24 h. Purification *via* column chromatography on silica gel (petroleum ether/ethyl acetate = 10/1, v/v) afforded the product **5l** (14.0 mg) in 32% yield as a white solid. M.p.: 173-175 °C. <sup>1</sup>H NMR (400 MHz, CDCl<sub>3</sub>)  $\delta$  = 7.50-7.54 (m, 1H), 7.68-7.74 (m, 2H), 7.77-7.84 (m, 2H), 8.16-8.18 (m, 1H), 8.29-8.31 (m, 1H), 8.35 (d, *J* = 7.6 Hz, 1H). <sup>13</sup>C NMR (100 MHz, CDCl<sub>3</sub>)  $\delta$  = 112.9, 121.4, 123.0, 124.6, 128.4, 128.8, 129.3, 129.9, 132.5, 139.9, 140.7, 141.4, 156.0, 158.6. HRMS (ESI<sup>+</sup>): calcd for C<sub>14</sub>H<sub>9</sub>N<sub>2</sub>O<sup>+</sup> [M+H]<sup>+</sup> 221.0709, found 221.0705.

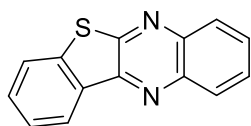

### Benzo[4,5]thieno[2,3-*b*]quinoxaline (**5m**)

Following the general procedure, the mixture of 2-(benzo[*b*]thiophen-2-yl)-2,3-dihydro-1*H*-benzo[*d*][1,3,2]diazaborole **2m** (50.0 mg, 0.2 mmol), Ag<sub>2</sub>O (185.4 mg, 4.0 equiv), DMSO (2 mL) was stirred at 80 °C for 24 h. Purification *via* column chromatography on silica gel (petroleum ether/ethyl acetate = 10/1, v/v) afforded the product **5m** (14.7 mg) in 31% yield as a white solid. M.p.: 152-154 °C. <sup>1</sup>H NMR (400 MHz, CDCl<sub>3</sub>)  $\delta$  = 7.59 (td, *J* = 8.0 Hz, 1.2 Hz, 1H), 7.68 (td, *J* = 8.0 Hz, 1.6 Hz, 1H), 7.81-7.84 (m, 2H), 7.88 (dt, *J* = 8.0 Hz, 0.8 Hz, 1H), 8.16-8.18 (m, 1H), 8.28-8.31 (m, 1H), 8.58-8.61 (m, 1H). <sup>13</sup>C NMR (100 MHz, CDCl<sub>3</sub>)  $\delta$  = 123.7, 124.5, 125.9, 128.5, 129.2, 129.7, 129.9, 131.1, 131.5, 140.1, 140.6, 141.5, 148.0, 157.5. HRMS (ESI<sup>+</sup>): calcd for C<sub>14</sub>H<sub>8</sub>N<sub>2</sub>S<sup>+</sup> [M+H]<sup>+</sup> 237.0481, found 237.0482.

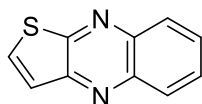

### Thieno[2,3-*b*]quinoxaline (**5n**)

Following the general procedure, the mixture of 2-(thiophen-2-yl)-2,3-dihydro-1*H*-benzo[*d*][1,3,2]diazaborole **2n** (40.0 mg, 0.2 mmol), Ag<sub>2</sub>O (185.4 mg, 4.0 equiv), DMSO (2 mL) was stirred at 80 °C for 24 h. Purification *via* column chromatography

on silica gel (petroleum ether/ethyl acetate = 10/1, v/v) afforded the product **5n** (15.2 mg) in 41% yield as a white solid. M.p.: 141-143 °C.  $^1\text{H}$  NMR (400 MHz,  $\text{CDCl}_3$ )  $\delta$  = 7.59 (d,  $J$  = 6.0 Hz, 1H), 7.81-7.83 (m, 2H), 8.07 (d,  $J$  = 6.4 Hz, 1H), 8.18-8.24 (m, 2H).  $^{13}\text{C}$  NMR (100 MHz,  $\text{CDCl}_3$ )  $\delta$  = 122.7, 128.8, 129.56, 129.58, 129.7, 135.9, 140.4, 141.1, 150.4, 156.1. HRMS ( $\text{ESI}^+$ ): calcd for  $\text{C}_{10}\text{H}_7\text{N}_2\text{S}^+$   $[\text{M}+\text{H}]^+$  187.0324, found 187.0325.

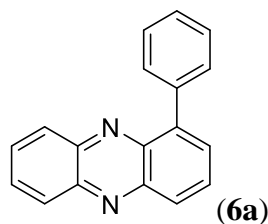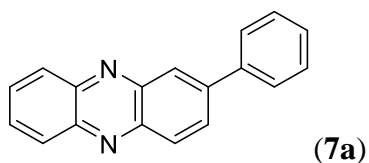

### 1-Phenylphenazine (**6a**)    2-Phenylphenazine (**7a**)

Following the general procedure, the mixture of 2-([1,1'-biphenyl]-3-yl)-2,3-dihydro-1*H*-benzo[*d*][1,3,2]diazaborole **3a** (54.0 mg, 0.2 mmol),  $\text{Ag}_2\text{O}$  (185.4 mg, 4.0 equiv), DMSO (2 mL) was stirred at 80 °C for 24 h. Purification *via* column chromatography on silica gel (petroleum ether/ethyl acetate/DCM = 20/1/10, v/v) afforded the product **6a** (29.2 mg) in 57% yield and **7a** (9.7 mg) in 19% yield as a yellow solid.

**6a** M.p.: 151-153 °C.  $^1\text{H}$  NMR (400 MHz,  $\text{CDCl}_3$ )  $\delta$  = 7.47-7.51 (m, 1H), 7.54-7.58 (m, 2H), 7.77-7.82 (m, 1H), 7.83-7.87 (m, 3H), 7.88-7.93 (m, 2H), 8.21-8.23 (m, 1H), 8.24-8.27 (m, 2H).  $^{13}\text{C}$  NMR (100 MHz,  $\text{CDCl}_3$ )  $\delta$  = 128.0, 128.2, 129.2, 129.5, 130.2, 130.46, 130.52, 130.6, 130.8, 131.1, 138.5, 141.2, 141.9, 143.1, 143.4, 143.7. HRMS ( $\text{ESI}^+$ ): calcd for  $\text{C}_{18}\text{H}_{13}\text{N}_2^+$   $[\text{M}+\text{H}]^+$  257.1073, found 257.1075.

**7a** M.p.: 157-159 °C.  $^1\text{H}$  NMR (400 MHz,  $\text{CDCl}_3$ )  $\delta$  = 7.44-7.48 (m, 1H), 7.53-7.57 (m, 2H), 7.83-7.86 (m, 4H), 8.15 (dd,  $J$  = 8.8 Hz, 2.0 Hz, 1H), 8.24-8.27 (m, 2H), 8.32 (dd,  $J$  = 9.2 Hz, 0.8 Hz, 1H), 8.46 (dd,  $J$  = 2.0 Hz, 0.4 Hz, 1H).  $^{13}\text{C}$  NMR (100 MHz,  $\text{CDCl}_3$ )  $\delta$  = 126.6, 127.5, 127.7, 128.7, 129.3, 129.7, 129.8, 130.1, 130.5, 130.7, 130.9, 139.6, 143.1, 143.6, 143.8, 144.0. HRMS ( $\text{ESI}^+$ ): calcd for  $\text{C}_{18}\text{H}_{13}\text{N}_2^+$   $[\text{M}+\text{H}]^+$  257.1073, found 257.1072.

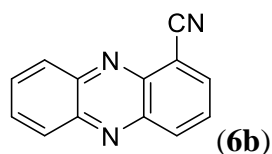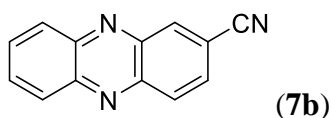

#### Phenazine-1-carbonitrile (**6b**) Phenazine-2-carbonitrile (**7b**)

Following the general procedure, the mixture of 3-(1,3-dihydro-2*H*-benzo[*d*][1,3,2]diazaborol-2-yl)benzonitrile **3b** (43.8 mg, 0.2 mmol), Ag<sub>2</sub>O (185.4 mg, 4.0 equiv), DMSO (2 mL) was stirred at 80 °C for 24 h. Purification *via* column chromatography on silica gel (petroleum ether/DCM = 3/1, v/v) afforded the product **6b** (13.5 mg) in 33% yield and **7b** (9.8 mg) in 24% yield as a yellow solid.

**6b** M.p.: 180-182 °C. <sup>1</sup>H NMR (400 MHz, CDCl<sub>3</sub>) δ = 7.88-7.97 (m, 3H), 8.25-8.31 (m, 2H), 8.39-8.42 (m, 1H), 8.48-8.51 (m, 1H). <sup>13</sup>C NMR (100 MHz, CDCl<sub>3</sub>) δ = 113.7, 116.5, 129.1, 129.8, 130.3, 132.1, 132.2, 135.2, 137.3, 142.1, 142.4, 144.2, 144.5. HRMS (ESI<sup>+</sup>): calcd for C<sub>13</sub>H<sub>8</sub>N<sub>3</sub><sup>+</sup> [M+H]<sup>+</sup> 206.0713, found 206.0715.

**7b** M.p.: 215-217 °C. <sup>1</sup>H NMR (400 MHz, CDCl<sub>3</sub>) δ = 7.91-7.96 (m, 3H), 8.26-8.29 (m, 2H), 8.35 (dd, *J* = 9.2 Hz, 0.8 Hz, 1H), 8.68 (dd, *J* = 2.0 Hz, 0.8 Hz, 1H). <sup>13</sup>C NMR (100 MHz, CDCl<sub>3</sub>) δ = 114.0, 118.2, 129.8, 130.0, 130.2, 131.7, 132.0, 132.6, 136.8, 142.1, 144.0, 144.7, 144.8. HRMS (ESI<sup>+</sup>): calcd for C<sub>13</sub>H<sub>8</sub>N<sub>3</sub><sup>+</sup> [M+H]<sup>+</sup> 206.0713, found 206.0713.

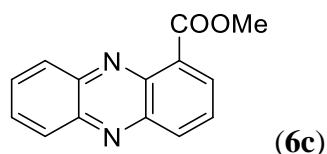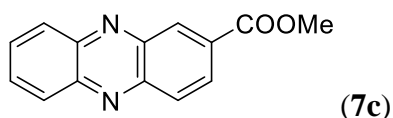

#### Methyl phenazine-1-carboxylate (**6c**) Methyl phenazine-2-carboxylate (**7c**)

Following the general procedure, the mixture of methyl 3-(1,3-dihydro-2*H*-benzo[*d*][1,3,2]diazaborol-2-yl)benzoate **3c** (50.4 mg, 0.2 mmol), Ag<sub>2</sub>O (185.4 mg, 4.0 equiv), DMSO (2 mL) was stirred at 80 °C for 24 h. Purification *via* column chromatography on silica gel (petroleum ether/ ethyl acetate = 5/1, v/v) afforded the product **6c** (17.8 mg) in 37% yield and **7c** (12.0 mg) in 25% yield as a yellow solid.

**6c** M.p.: 135-137 °C. <sup>1</sup>H NMR (400 MHz, CDCl<sub>3</sub>) δ = 4.11 (s, 3H), 7.84-7.88 (m, 3H), 8.22-8.25 (m, 2H), 8.32-8.35 (m, 1H), 8.39 (dd, *J* = 8.8 Hz, 1.6 Hz, 1H). <sup>13</sup>C NMR (100 MHz, CDCl<sub>3</sub>) δ = 52.9, 129.2, 129.6, 130.6, 131.1, 131.4, 131.6, 132.2, 133.6, 141.2,

142.9, 143.5, 143.9, 167.3. HRMS (ESI<sup>+</sup>): calcd for C<sub>14</sub>H<sub>11</sub>N<sub>2</sub>O<sub>2</sub><sup>+</sup> [M+H]<sup>+</sup> 239.0815, found 239.0819.

**7c** M.p.: 125-127 °C. <sup>1</sup>H NMR (400 MHz, CDCl<sub>3</sub>) δ = 4.04 (s, 3H), 7.85-7.92 (m, 2H), 8.24-8.29 (m, 3H), 8.39 (dd, *J* = 9.2 Hz, 2.0 Hz, 1H), 8.99-9.00 (m, 1H). <sup>13</sup>C NMR (100 MHz, CDCl<sub>3</sub>) δ = 52.9, 129.4, 129.9, 130.11, 130.14, 131.1, 131.7, 131.8, 133.1, 142.7, 144.3, 144.5, 144.8, 166.4. HRMS (ESI<sup>+</sup>): calcd for C<sub>14</sub>H<sub>11</sub>N<sub>2</sub>O<sub>2</sub><sup>+</sup> [M+H]<sup>+</sup> 239.0815, found 239.0819.

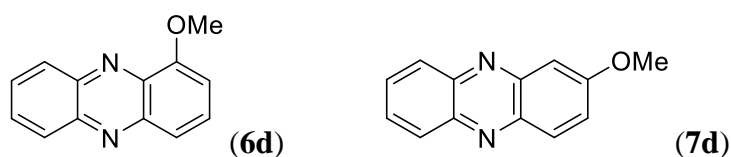

**1-Methoxyphenazine (6d)    2-Methoxyphenazine (7d)**

Following the general procedure, the mixture of 2-(3-methoxyphenyl)-2,3-dihydro-1*H*-benzo[*d*][1,3,2]diazaborole **3d** (44.8 mg, 0.2 mmol), Ag<sub>2</sub>O (185.4 mg, 4.0 equiv), DMSO (2 mL) was stirred at 80 °C for 24 h. Purification *via* column chromatography on silica gel (petroleum ether/ ethyl acetate = 5/1, v/v) afforded the product **6d** (16.7 mg) in 40% yield and **7c** (9.1 mg) in 21% yield as a yellow solid.

**6d** M.p.: 121-123 °C. <sup>1</sup>H NMR (400 MHz, CDCl<sub>3</sub>) δ = 4.17 (s, 3H), 7.06 (d, *J* = 7.2 Hz, 1H), 7.72-7.76 (m, 1H), 7.80-7.86 (m, 3H), 8.21-8.23 (m, 1H), 8.38-8.40 (m, 1H). <sup>13</sup>C NMR (100 MHz, CDCl<sub>3</sub>) δ = 56.6, 106.6, 121.6, 129.4, 130.30, 130.33, 130.7, 131.0, 137.0, 142.3, 143.6, 144.4, 155.2. HRMS (ESI<sup>+</sup>): calcd for C<sub>13</sub>H<sub>11</sub>N<sub>2</sub>O<sup>+</sup> [M+H]<sup>+</sup> 211.0866, found 211.0869.

**7d** M.p.: 165-167 °C. <sup>1</sup>H NMR (400 MHz, CDCl<sub>3</sub>) δ = 4.02 (s, 3H), 7.40 (d, *J* = 2.4 Hz, 1H), 7.51 (dd, *J* = 9.6 Hz, 2.8 Hz, 1H), 7.74-7.83 (m, 2H), 8.09 (d, *J* = 9.6 Hz, 1H), 8.15-8.22 (m, 2H). <sup>13</sup>C NMR (100 MHz, CDCl<sub>3</sub>) δ = 56.1, 104.6, 126.6, 129.0, 129.2, 129.8, 130.6, 130.8, 140.9, 142.0, 143.4, 145.2, 161.4. HRMS (ESI<sup>+</sup>): calcd for C<sub>13</sub>H<sub>11</sub>N<sub>2</sub>O<sup>+</sup> [M+H]<sup>+</sup> 211.0866, found 211.0866.

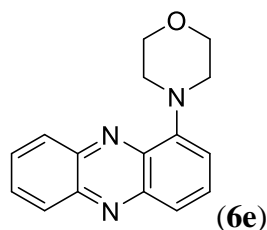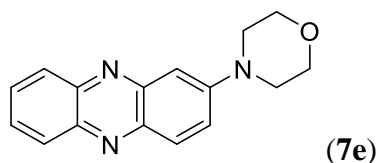

**4-(Phenazin-1-yl)morpholine (6e) 4-(Phenazin-2-yl)morpholine (7e)**

Following the general procedure, the mixture of 4-(3-(1,3-dihydro-2*H*-benzo[*d*][1,3,2]diazaborol-2-yl)phenyl)morpholine **3e** (55.8 mg, 0.2 mmol), Ag<sub>2</sub>O (185.4 mg, 4.0 equiv), DMSO (2 mL) was stirred at 80 °C for 24 h. Purification *via* column chromatography on silica gel (petroleum ether/ ethyl acetate = 5/1, v/v) afforded the product **6e** (28.0 mg) in 53% yield as a red solid and **7e** (12.0 mg) in 23% yield as an orange solid.

**6e** M.p.: 169-171 °C. <sup>1</sup>H NMR (400 MHz, CDCl<sub>3</sub>) δ = 3.54 (t, *J* = 4.8 Hz, 4H), 4.11 (t, *J* = 4.4 Hz, 4H), 7.13 (d, *J* = 7.6 Hz, 1H), 7.72-7.76 (m, 1H), 7.78-7.84 (m, 2H), 7.86-7.88 (m, 1H), 8.19-8.25 (m, 2H). <sup>13</sup>C NMR (100 MHz, CDCl<sub>3</sub>) δ = 52.8, 67.2, 115.0, 123.3, 129.3, 130.0, 130.3, 130.7, 131.0, 138.9, 141.3, 143.0, 144.9, 149.2. HRMS (ESI<sup>+</sup>): calcd for C<sub>16</sub>H<sub>16</sub>N<sub>3</sub>O<sup>+</sup> [M+H]<sup>+</sup> 266.1288, found 266.1286.

**7e** M.p.: 150-152 °C. <sup>1</sup>H NMR (400 MHz, CDCl<sub>3</sub>) δ = 3.44 (t, *J* = 4.8 Hz, 4H), 3.93 (t, *J* = 4.8 Hz, 4H), 7.30 (d, *J* = 2.4 Hz, 1H), 7.65 (dd, *J* = 9.6 Hz, 2.4 Hz, 1H), 7.69-7.72 (m, 1H), 7.75-7.79 (m, 1H), 8.07 (d, *J* = 10.0 Hz, 1H), 8.11 (d, *J* = 8.4 Hz, 1H), 8.16 (d, *J* = 8.8 Hz, 1H). <sup>13</sup>C NMR (100 MHz, CDCl<sub>3</sub>) δ = 48.6, 66.7, 107.3, 124.7, 128.7, 128.9, 129.7, 130.4, 130.5, 140.5, 141.9, 143.9, 145.3, 152.1. HRMS (ESI<sup>+</sup>): calcd for C<sub>16</sub>H<sub>16</sub>N<sub>3</sub>O<sup>+</sup> [M+H]<sup>+</sup> 266.1288, found 266.1286.

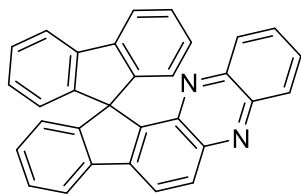

**Spiro[fluorene-9,12'-indeno[2,1-*a*]phenazine] (6f)**

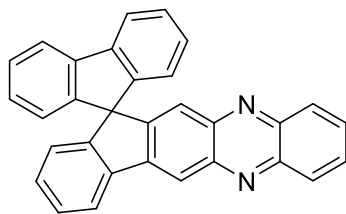

### Spiro[fluorene-9,11'-indeno[1,2-*b*]phenazine] (**7f**)

Following the general procedure, the mixture of 2-(9,9'-spirobi[fluorene]-2-yl)-2,3-dihydro-1*H*-benzo[*d*][1,3,2]diazaborole **3f** (86.4 mg, 0.2 mmol), Ag<sub>2</sub>O (185.4 mg, 4.0 equiv), DMSO (2 mL) was stirred at 80 °C for 24 h. Purification *via* column chromatography on silica gel (petroleum ether/DCM = 5/1, v/v) afforded the product **6f** (28.6 mg) in 34% yield and the product **7f** (21.7 mg) in 26% as a yellow solid.

**6f** M.p.: > 250 °C. <sup>1</sup>H NMR (400 MHz, CDCl<sub>3</sub>) δ = 6.65 (d, *J* = 7.6 Hz, 2H), 6.87 (d, *J* = 7.6 Hz, 1H), 6.99 (t, *J* = 7.6 Hz, 2H), 7.22 (t, *J* = 7.2 Hz, 1H), 7.37 (t, *J* = 7.6 Hz, 2H), 7.46 (t, *J* = 7.6 Hz, 1H), 7.53 (d, *J* = 3.6 Hz, 2H), 7.60-7.64 (m, 1H), 7.98-8.02 (m, 3H), 8.05 (d, *J* = 8.8 Hz, 1H), 8.32-8.42 (m, 2H). <sup>13</sup>C NMR (100 MHz, CDCl<sub>3</sub>) δ = 66.3, 120.2, 120.6, 123.2, 123.9, 124.2, 127.3, 127.6, 127.9, 128.7, 129.3, 129.8, 130.0, 130.5, 131.0, 140.1, 141.2, 142.5, 143.2, 143.5, 143.8, 143.86, 143.95, 148.0, 151.5. HRMS (ESI<sup>+</sup>): calcd for C<sub>31</sub>H<sub>19</sub>N<sub>2</sub><sup>+</sup> [M+H]<sup>+</sup> 419.1543, found 419.1540.

**7f** M.p.: 253-255 °C. <sup>1</sup>H NMR (400 MHz, CDCl<sub>3</sub>) δ = 6.82 (d, *J* = 7.6 Hz, 2H), 6.87 (d, *J* = 7.6 Hz, 1H), 7.12 (td, *J* = 7.6 Hz, 1.2 Hz, 2H), 7.29 (td, *J* = 7.6 Hz, 1.2 Hz, 1H), 7.40 (td, *J* = 7.6 Hz, 0.8 Hz, 2H), 7.48-7.53 (m, 2H), 7.73-7.82 (m, 2H), 7.90 (d, *J* = 7.6 Hz, 2H), 8.06 (dd, *J* = 8.4 Hz, 0.8 Hz, 1H), 8.13 (d, *J* = 8.0 Hz, 1H), 8.23 (dd, *J* = 8.8 Hz, 1.2 Hz, 1H), 8.61 (s, 1H). <sup>13</sup>C NMR (100 MHz, CDCl<sub>3</sub>) δ = 65.4, 118.4, 120.3, 122.1, 124.1, 124.4, 125.0, 128.2, 128.3, 128.7, 129.5, 129.6, 130.1, 130.4, 130.7, 139.9, 141.6, 142.9, 143.4, 144.0, 144.2, 145.3, 149.5, 149.9, 153.3. HRMS (ESI<sup>+</sup>): calcd for C<sub>31</sub>H<sub>19</sub>N<sub>2</sub><sup>+</sup> [M+H]<sup>+</sup> 419.1543, found 419.1540.

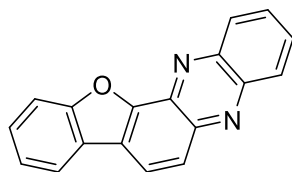

### Benzofuro[2,3-*a*]phenazine (**6g**)

Following the general procedure, the mixture of 2-(dibenzo[*b,d*]furan-3-yl)-2,3-dihydro-1*H*-benzo[*d*][1,3,2]diazaborole **3g** (56.8 mg, 0.2 mmol), Ag<sub>2</sub>O (185.4 mg, 4.0 equiv), DMSO (2 mL) was stirred at 80 °C for 24 h. Purification *via* column chromatography on silica gel (petroleum ether/ethyl acetate = 10/1, v/v) afforded the product **6g** (37.8 mg) in 70% yield as a yellow solid. M.p.: 234-236 °C. <sup>1</sup>H NMR (400 MHz, CDCl<sub>3</sub>)  $\delta$  = 7.45-7.49 (m, 1H), 7.55-7.59 (m, 1H), 7.85-7.92 (m, 3H), 8.05 (d, *J* = 7.6 Hz, 1H), 8.15 (d, *J* = 9.2 Hz, 1H), 8.27-8.30 (m, 1H), 8.34 (d, *J* = 8.8 Hz, 1H), 8.44-8.46 (m, 1H). <sup>13</sup>C NMR (100 MHz, CDCl<sub>3</sub>)  $\delta$  = 112.9, 120.8, 123.0, 123.7, 123.9, 124.4, 125.4, 127.8, 129.86, 129.88, 130.6, 131.1, 133.6, 142.8, 143.1, 143.8, 149.6, 157.1. HRMS (ESI<sup>+</sup>): calcd for C<sub>18</sub>H<sub>11</sub>N<sub>2</sub>O<sup>+</sup> [M+H]<sup>+</sup> 271.0866, found 271.0867.

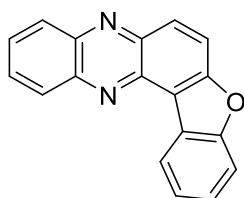

#### Benzofuro[3,2-*a*]phenazine (**6h**)

Following the general procedure, the mixture of 2-(dibenzo[*b,d*]furan-2-yl)-2,3-dihydro-1*H*-benzo[*d*][1,3,2]diazaborole **3h** (56.8 mg, 0.2 mmol), Ag<sub>2</sub>O (185.4 mg, 4.0 equiv), DMSO (2 mL) was stirred at 80 °C for 24 h. Purification *via* column chromatography on silica gel (petroleum ether/ethyl acetate = 5/1, v/v) afforded the product **6h** (32.5 mg) in 60% yield as a yellow solid. M.p.: 183-185 °C. <sup>1</sup>H NMR (400 MHz, CDCl<sub>3</sub>)  $\delta$  = 7.51-7.54 (m, 2H), 7.67-7.70 (m, 1H), 7.80-7.88 (m, 2H), 8.05 (d, *J* = 9.2 Hz, 1H), 8.18 (d, *J* = 9.6 Hz, 1H), 8.24-8.26 (m, 1H), 8.32-8.34 (m, 1H), 8.84-8.87 (m, 1H). <sup>13</sup>C NMR (100 MHz, CDCl<sub>3</sub>)  $\delta$  = 111.8, 118.0, 119.2, 123.8, 124.1, 124.6, 126.7, 129.3, 129.7, 129.9, 130.6, 140.5, 141.8, 142.2, 143.0, 156.1, 156.3. HRMS (ESI<sup>+</sup>): calcd for C<sub>18</sub>H<sub>11</sub>N<sub>2</sub>O<sup>+</sup> [M+H]<sup>+</sup> 271.0866, found 271.0867.

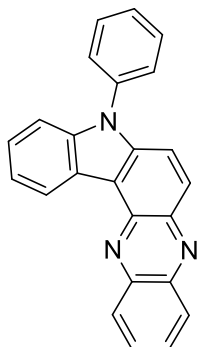

### 8-Phenyl-8*H*-indolo[3,2-*a*]phenazine (**6i**)

Following the general procedure, the mixture of 3-(1,3-dihydro-2*H*-benzo[*d*][1,3,2]diazaborol-2-yl)-9-phenyl-9*H*-carbazole **3i** (71.8 mg, 0.2 mmol), Ag<sub>2</sub>O (185.4 mg, 4.0 equiv), DMSO (2 mL) was stirred at 80 °C for 24 h. Purification *via* column chromatography on silica gel (petroleum ether/ethyl acetate/DCM = 10/1/1, v/v) afforded the product **6i** (60.0 mg) in 87% yield as a red solid. M.p.: 145-147 °C. <sup>1</sup>H NMR (400 MHz, CDCl<sub>3</sub>)  $\delta$  = 7.50-7.60 (m, 4H), 7.63-7.70 (m, 4H), 7.80-7.84 (m, 1H), 7.87-7.93 (m, 2H), 8.12 (d, *J* = 9.2 Hz, 1H), 8.28-8.30 (m, 1H), 8.44-8.47 (m, 1H), 9.31 (d, *J* = 7.6 Hz, 1H). <sup>13</sup>C NMR (100 MHz, CDCl<sub>3</sub>)  $\delta$  = 110.8, 115.2, 119.0, 122.2, 123.9, 124.4, 125.4, 127.7, 128.0, 128.6, 128.8, 129.66, 129.71, 130.1, 130.2, 136.8, 139.7, 140.1, 141.3, 141.8, 142.0, 143.2. HRMS (ESI<sup>+</sup>): calcd for C<sub>24</sub>H<sub>16</sub>N<sub>3</sub><sup>+</sup> [M+H]<sup>+</sup> 346.1339, found 346.1334.

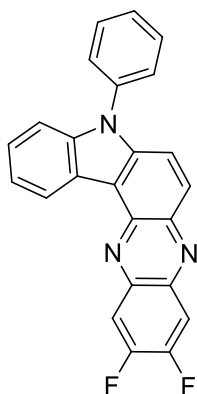

### 2,3-Difluoro-8-phenyl-8*H*-indolo[3,2-*a*]phenazine (**6j**)

Following the general procedure, the mixture of 3-(5,6-difluoro-1,3-dihydro-2*H*-benzo[*d*][1,3,2]diazaborol-2-yl)-9-phenyl-9*H*-carbazole **3j** (79.0 mg, 0.2 mmol), Ag<sub>2</sub>O (185.4 mg, 4.0 equiv), DMSO (2 mL) was stirred at 80 °C for 24 h. Purification *via* column chromatography on silica gel (petroleum ether/ethyl acetate = 4/1, v/v) afforded



the product **6j** (51.0 mg) in 67% yield as a yellow solid. M.p.: 162-165 °C. <sup>1</sup>H NMR (400 MHz, CDCl<sub>3</sub>)  $\delta$  = 7.49-7.64 (m, 6H), 7.68-7.71 (m, 2H), 7.91-7.98 (m, 2H), 8.04 (d,  $J$  = 9.6 Hz, 1H), 8.12 (dd,  $J$  = 10.8 Hz, 8.8 Hz, 1H), 9.20 (d,  $J$  = 6.8 Hz, 1H). <sup>13</sup>C NMR (100 MHz, CDCl<sub>3</sub>)  $\delta$  = 110.9, 114.07, 114.08, 114.21, 114.23, 114.25, 114.38, 114.40, 119.3, 122.3, 123.7, 124.2, 125.6, 127.6, 127.7, 128.7, 130.3, 136.6, 138.3, 139.8, 140.1, 141.5. HRMS (ESI<sup>+</sup>): calcd for C<sub>24</sub>H<sub>14</sub>F<sub>2</sub>N<sub>3</sub><sup>+</sup> [M+H]<sup>+</sup> 382.1150, found 382.1148.

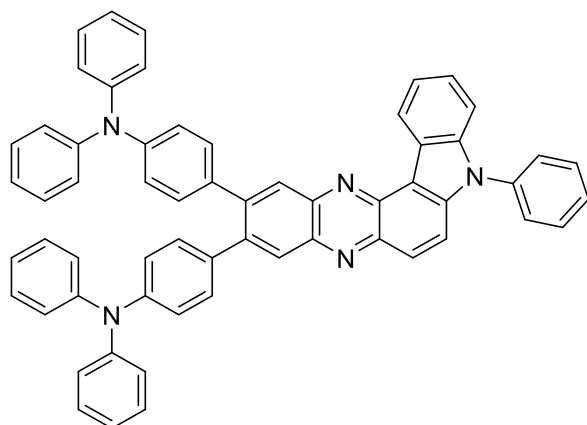

**4,4'-(8-Phenyl-8H-indolo[3,2-a]phenazine-2,3-diyl)bis(*N,N*-diphenylaniline) (**6k**)**

Following the general procedure, the mixture of 4,4'-(2-(9-phenyl-9H-carbazol-3-yl)-2,3-dihydro-1H-benzo[*d*][1,3,2]diazaborole-5,6-diyl)bis(*N,N*-diphenylaniline) **3k** (84.5 mg, 0.2 mmol), Ag<sub>2</sub>O (185.4 mg, 4.0 equiv), DMSO (2 mL) was stirred at 80 °C for 24 h. Purification *via* column chromatography on silica gel (petroleum ether/ethyl acetate = 4/1, v/v) afforded the product **6k** (73.6 mg) in 88% yield as an orange solid. M.p.: > 250 °C. <sup>1</sup>H NMR (400 MHz, CDCl<sub>3</sub>)  $\delta$  = 7.03-7.08 (m, 8H), 7.13-7.16 (m, 8H), 7.21-7.25 (m, 5H), 7.27-7.30 (m, 7H), 7.51-7.60 (m, 4H), 7.64-7.71 (m, 4H), 7.91 (d,  $J$  = 9.2 Hz, 1H), 8.12 (d,  $J$  = 9.2 Hz, 1H), 8.33 (s, 1H), 8.50 (s, 1H), 9.30-9.33 (m, 1H). <sup>13</sup>C NMR (100 MHz, CDCl<sub>3</sub>)  $\delta$  = 110.8, 115.3, 118.6, 122.2, 122.8, 123.0, 123.1, 123.2, 123.9, 124.5, 124.6, 124.7, 125.3, 127.7, 128.0, 128.6, 129.5, 129.7, 129.9, 130.2, 131.0, 134.6, 134.9, 136.8, 139.7, 140.1, 140.8, 142.0, 142.1, 142.3, 142.6, 143.7, 147.06, 147.14, 147.72, 147.75. HRMS (ESI<sup>+</sup>): calcd for C<sub>60</sub>H<sub>42</sub>N<sub>5</sub><sup>+</sup> [M+H]<sup>+</sup> 832.3435, found 832.3429.

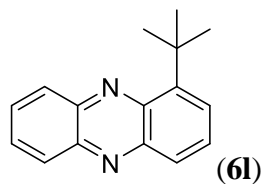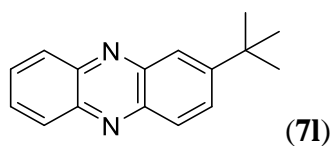

### 1-(*tert*-Butyl)phenazine (**6l**)

### 2-(*tert*-Butyl)phenazine (**7l**)

Following the general procedure, the mixture of 2-(3-(*tert*-butyl)phenyl)-2,3-dihydro-1*H*-benzo[*d*][1,3,2]diazaborole **3l** (50.0 mg, 0.2 mmol), Ag<sub>2</sub>O (185.4 mg, 4.0 equiv), DMSO (2 mL) was stirred at 80 °C for 24 h. Purification *via* column chromatography on silica gel (petroleum ether/ ethyl acetate = 5/1, v/v) afforded the product **6l** (16.1 mg) in 34% yield and **7l** (19.2 mg) in 41% yield as a yellow solid.

**6l** M.p.: 90-92 °C. <sup>1</sup>H NMR (400 MHz, CDCl<sub>3</sub>)  $\delta$  = 1.76 (s, 9H), 7.73-7.75 (m, 2H), 7.79-7.84 (m, 2H), 8.09 (dd, *J* = 6.8 Hz, 3.2 Hz, 1H), 8.19-8.22 (m, 1H), 8.26-8.28 (m, 1H). <sup>13</sup>C NMR (100 MHz, CDCl<sub>3</sub>)  $\delta$  = 31.3, 37.1, 126.4, 128.4, 129.2, 129.8, 130.35, 130.42, 141.4, 142.1, 143.3, 144.4, 149.0. HRMS (ESI<sup>+</sup>): calcd for C<sub>16</sub>H<sub>17</sub>N<sub>2</sub><sup>+</sup> [M+H]<sup>+</sup> 237.1386, found 237.1383.

**7l** M.p.: 138-140 °C. <sup>1</sup>H NMR (400 MHz, CDCl<sub>3</sub>)  $\delta$  = 1.49 (s, 9H), 7.80-7.85 (m, 2H), 7.95-7.97 (m, 1H), 8.15-8.20 (m, 2H), 8.22-8.26 (m, 2H). <sup>13</sup>C NMR (100 MHz, CDCl<sub>3</sub>)  $\delta$  = 30.9, 35.7, 124.1, 129.1, 129.6, 129.8, 130.1, 130.4, 130.6, 142.5, 143.3, 143.6, 143.8, 154.1. HRMS (ESI<sup>+</sup>): calcd for C<sub>16</sub>H<sub>17</sub>N<sub>2</sub><sup>+</sup> [M+H]<sup>+</sup> 237.1386, found 237.1383.

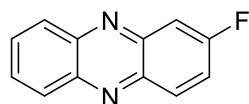

### 2-Fluorophenazine (**6m**)

Following the general procedure, the mixture of 2-(2,4-difluorophenyl)-2,3-dihydro-1*H*-benzo[*d*][1,3,2]diazaborole **3m** (46.0 mg, 0.2 mmol), Ag<sub>2</sub>O (185.4 mg, 4.0 equiv), DMSO (2 mL) was stirred at 80 °C for 24 h. Purification *via* column chromatography on silica gel (petroleum ether/ ethyl acetate = 10/1, v/v) afforded the product **6m** (20.0 mg) in 50% yield as a yellow solid. M.p.: 198-200 °C. <sup>1</sup>H NMR (400 MHz, DMSO-*d*<sub>6</sub>)  $\delta$  = 7.91-7.94 (m, 1H), 7.95-8.01 (m, 3H), 8.21-8.26 (m, 2H), 8.32-8.36 (m, 1H). <sup>13</sup>C NMR (100 MHz, CDCl<sub>3</sub>)  $\delta$  = 111.8 (d, *J*<sub>CF</sub> = 21 Hz), 122.7 (d, *J*<sub>CF</sub> = 28 Hz), 129.4, 129.9 (d, *J*<sub>CF</sub> = 1 Hz), 130.5 (d, *J*<sub>CF</sub> = 1 Hz), 131.3, 132.2 (d, *J*<sub>CF</sub> = 10 Hz), 141.1, 143.1

(d,  $J_{\text{CF}} = 2$  Hz), 143.8, 144.0 (d,  $J_{\text{CF}} = 13$  Hz), 163.2 (d,  $J_{\text{CF}} = 254$  Hz). HRMS (ESI<sup>+</sup>): calcd for C<sub>12</sub>H<sub>8</sub>FN<sub>2</sub><sup>+</sup> [M+H]<sup>+</sup> 199.0666, found 199.0663.

#### iv) General procedure for the nucleophilic aromatic substitution reaction and suzuki reaction.

##### 1) General procedure for nucleophilic aromatic substitution reaction

A dried Schlenk tube with a magnetic stir bar was charged with several of 3,6-bis(*tert*-butyl)carbazole (2.5 equiv), *t*-BuOk (2.5 equiv). The system was evacuated thrice and back filled with N<sub>2</sub>. Next, the solvent DMF (2 mL) was added *via* a syringe and the rubber septum was replaced with a stopper under N<sub>2</sub>. Then the reaction mixture was stirred 30 min at room temperature, followed the fluoro-substituted phenazines (0.2 mmol) were added, the reaction was stirred at 80 °C for 8 h in an oil bath. After the reaction mixture was cooled to ambient temperature, the solvent was removed under reduced pressure. The residue was dissolved in 10 mL of CH<sub>2</sub>Cl<sub>2</sub>, filtered through a celite pad, and then washed with 20-30 mL of CH<sub>2</sub>Cl<sub>2</sub>. The combined filtrates were concentrated and purified *via* column chromatography on silica gel (100-200 mesh) to provide the desired products.

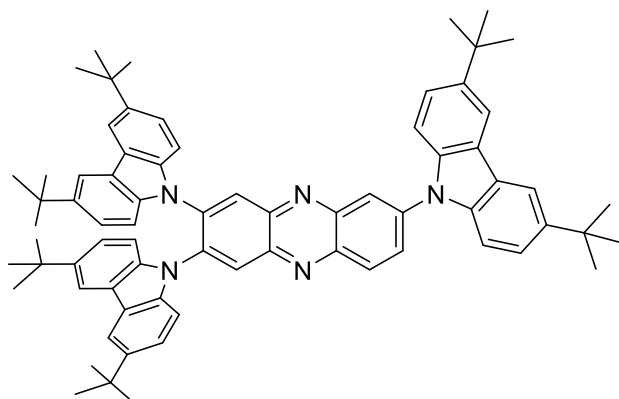

##### 2,3,7-Tris(3,6-di-*tert*-butyl-9*H*-carbazol-9-yl)phenazine (8a)

Following the general procedure, the mixture of 7-(3,6-di-*tert*-butyl-9*H*-carbazol-9-yl)-2,3-difluorophenazine **5b** (98.6 mg, 0.2 mmol), 3,6-bis(*tert*-butyl)carbazole (139.71 mg, 2.5 equiv), *t*-BuOk (56.1 mg, 2.5equiv), DMF (3 mL) was stirred at 80 °C for 8 h. Purification *via* column chromatography on silica gel (petroleum ether/ DCM = 3/1, v/v) afforded the product **8a** (161.8 mg) in 80% yield as a salmon solid. M.p.: 232-234 °C. <sup>1</sup>H NMR (400 MHz, CDCl<sub>3</sub>)  $\delta$  = 1.36 (d,  $J = 2.4$  Hz, 36H), 1.51 (s, 18H), 6.91

(d,  $J = 8.4$  Hz, 4H), 6.97 (d,  $J = 8.8$  Hz, 4H), 7.57 (dd,  $J = 8.8$  Hz, 2.0 Hz, 2H), 7.63 (s, 4H), 7.71 (d,  $J = 8.4$  Hz, 2H), 8.21 (d,  $J = 5.2$  Hz, 2H), 8.25 (dd,  $J = 9.2$  Hz, 2.0 Hz, 1H), 8.49-8.53 (m, 2H), 8.72 (s, 1H), 8.75 (s, 1H).  $^{13}\text{C}$  NMR (100 MHz,  $\text{CDCl}_3$ )  $\delta = 32.0, 32.1, 34.6, 35.0, 109.01, 109.03, 109.7, 115.5, 116.7, 123.0, 123.8, 123.9, 124.2, 124.4, 129.6, 130.0, 130.4, 131.4, 137.9, 138.1, 138.2, 138.6, 140.7, 142.7, 142.9, 143.3, 143.4, 144.3$ . HRMS (ESI<sup>+</sup>): calcd for  $\text{C}_{72}\text{H}_{78}\text{N}_5^+$   $[\text{M}+\text{H}]^+$  1012.6252, found 1012.6255.

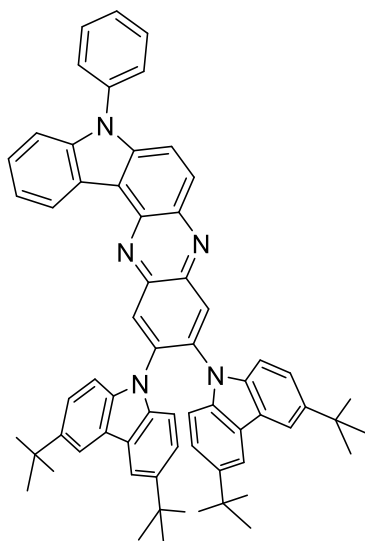

**2,3-Bis(3,6-di-*tert*-butyl-9H-carbazol-9-yl)-8-phenyl-8H-indolo[3,2-*a*]phenazine (8b)**

Following the general procedure, the mixture of 2,3-difluoro-8-phenyl-8H-indolo[3,2-*a*]phenazine **6j** (76.2 mg, 0.2 mmol), 3,6-bis(*tert*-butyl)carbazole (139.71mg, 2.5 equiv), *t*-BuOK (56.1 mg, 2.5equiv), DMF (3 mL) was stirred at 80 °C for 8 h. Purification *via* column chromatography on silica gel (petroleum ether/ DCM = 3/1, v/v) afforded the product **8b** (134.9 mg) in 75% yield as a yellow solid. M.p.: 225-227 °C.  $^1\text{H}$  NMR (400 MHz,  $\text{CDCl}_3$ )  $\delta = 1.36$  (d,  $J = 4.4$  Hz, 36H), 6.89-6.95 (m, 4H), 6.97-7.02 (m, 4H), 7.51-7.59 (m, 3H), 7.62-7.65 (m, 5H), 7.69-7.74 (m, 4H), 8.01 (d,  $J = 9.6$  Hz, 1H), 8.19 (d,  $J = 9.2$  Hz, 1H), 8.75 (s, 1H), 8.89 (s, 1H), 9.33 (d,  $J = 8.0$  Hz, 1H).  $^{13}\text{C}$  NMR (100 MHz,  $\text{CDCl}_3$ )  $\delta = 32.0, 34.63, 34.64, 109.16, 109.18, 110.9, 115.4, 115.4, 119.7, 122.5, 122.90, 122.94, 123.81, 123.84, 124.0, 125.6, 127.7, 128.0, 128.7, 129.9, 130.1, 130.3, 135.5, 136.7, 136.9, 138.4, 138.5, 140.0, 140.4, 142.3, 142.3, 142.5,$

143.0, 143.1. HRMS (ESI<sup>+</sup>): calcd for C<sub>64</sub>H<sub>62</sub>N<sub>5</sub><sup>+</sup> [M+H]<sup>+</sup> 900.5000, found 900.4991.

## 2) General procedure for suzuki reaction

A dried Schlenk tube with a magnetic stir bar was charged with several of bromo-substituted phenazines (0.2 mmol), 4-(diphenylamino)phenylboronic acid (2.25 equiv), Pd(PPh<sub>3</sub>)<sub>4</sub> (5 mol%), K<sub>2</sub>CO<sub>3</sub> (4.0 equiv). The system was evacuated thrice and back filled with N<sub>2</sub>. Next, the solvent dioxane and H<sub>2</sub>O (3.3 mL, V/V = 10:1) was added *via* a syringe and the rubber septum was replaced with a stopper under N<sub>2</sub>. Then the reaction mixture was stirred at 90 °C for 24 h in an oil bath. After the reaction mixture was cooled to ambient temperature, the solvent was removed under reduced pressure. The residue was dissolved in 10 mL of CH<sub>2</sub>Cl<sub>2</sub>, filtered through a celite pad, and then washed with 20-30 mL of CH<sub>2</sub>Cl<sub>2</sub>. The combined filtrates were concentrated and purified *via* column chromatography on silica gel (100-200 mesh) to provide the desired products.

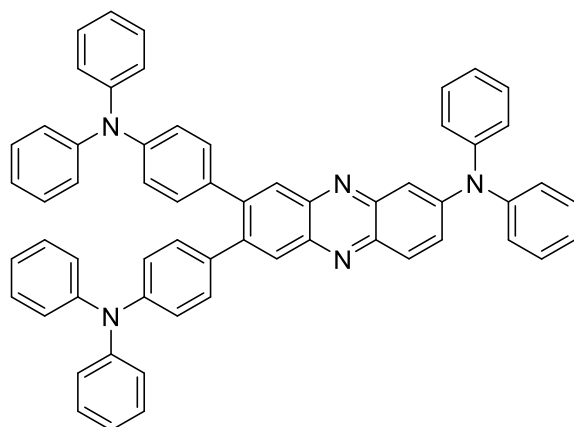

### 4,4'-(7-(Diphenylamino)phenazine-2,3-diyl)bis(*N,N*-diphenylaniline) (**8c**)

Following the general procedure, the mixture of 7,8-dibromo-*N,N*-diphenylphenazine-2-amine **5c** (100.6 mg, 0.2 mmol), 4-(diphenylamino)phenylboronic acid (130.1 mg, 2.25 equiv), Pd(PPh<sub>3</sub>)<sub>4</sub> (11.6 mg, 5 mol%), K<sub>2</sub>CO<sub>3</sub> (110 mg, 4.0 equiv). dioxane/H<sub>2</sub>O (3 mL, 10/1) was stirred at 90 °C for 24 h. Purification *via* column chromatography on silica gel (petroleum ether/ DCM = 3/1, v/v) afforded the product **8c** (143.3 mg) in 86% yield as a red solid. M.p.: 236-238 °C. <sup>1</sup>H NMR (400 MHz, CDCl<sub>3</sub>)  $\delta$  = 7.00-7.07 (m, 8H), 7.13-7.23 (m, 14H), 7.26-7.29 (m, 12H), 7.39 (t, *J* = 8.0 Hz, 4H), 7.49 (d, *J* = 2.4 Hz, 1H), 7.66 (dd, *J* = 9.6 Hz, 2.4 Hz, 1H), 8.01 (d, *J* = 9.6 Hz, 1H), 8.09 (s, 1H), 8.19

(s, 1H).  $^{13}\text{C}$  NMR (100 MHz,  $\text{CDCl}_3$ )  $\delta$  = 114.0, 122.5, 122.7, 123.19, 123.23, 124.7, 124.8, 125.2, 126.3, 128.1, 128.9, 129.4, 129.7, 129.8, 129.9, 130.8, 134.2, 134.4, 141.4, 141.6, 142.4, 143.4, 144.1, 145.4, 146.5, 147.1, 147.2, 147.6, 147.7, 149.6. HRMS ( $\text{ESI}^+$ ): calcd for  $\text{C}_{60}\text{H}_{44}\text{N}_5^+$   $[\text{M}+\text{H}]^+$ : 834.3591, found 834.3590.

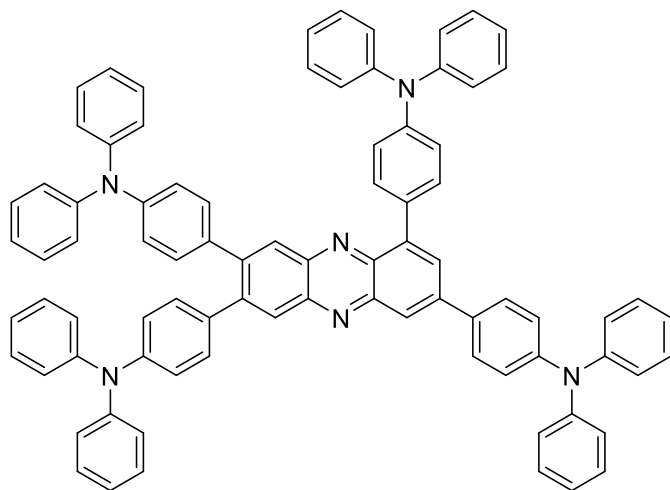

**4,4',4'',4'''-(Phenazine-1,3,7,8-tetrayl)tetrakis(*N,N*-diphenylaniline) (8d)**

Following the general procedure, the mixture of 4,4'-(6,8-dibromophenazine-2,3-diyl)bis(*N,N*-diphenylaniline) **5e** (164.4 mg, 0.2 mmol), 4-(diphenylamino)phenylboronic acid (130.1 mg, 2.25 equiv),  $\text{Pd}(\text{PPh}_3)_4$  (11.6 mg, 5 mol%),  $\text{K}_2\text{CO}_3$  (110 mg, 4.0 equiv). dioxane/ $\text{H}_2\text{O}$  (3 mL, 10/1) was stirred at 90 °C for 24 h. Purification *via* column chromatography on silica gel (petroleum ether/ DCM = 3/1, v/v) afforded the product **8d** (209.7 mg) in 91% yield as a red solid. M.p.: 245-247 °C.  $^1\text{H}$  NMR (400 MHz,  $\text{CDCl}_2\text{CDCl}_2$ )  $\delta$  = 7.66-8.02 (m, 52H), 8.47 (d,  $J$  = 8.4 Hz, 4H), 8.83-8.90 (m, 3H), 9.04 (s, 1H).  $^{13}\text{C}$  NMR (100 MHz,  $\text{CDCl}_3$ )  $\delta$  = 122.5, 122.79, 122.82, 123.18, 123.24, 123.3, 123.4, 123.6, 124.1, 124.7, 124.8, 124.9, 124.9, 124.96, 125.04, 128.3, 129.1, 129.5, 129.6, 129.8, 130.5, 130.8, 130.9, 131.9, 132.2, 132.9, 134.1, 134.4, 140.5, 141.6, 141.9, 143.5, 144.46, 144.55, 147.2, 147.3, 147.5, 147.6, 147.7, 147.8, 148.4. HRMS ( $\text{ESI}^+$ ): calcd for  $\text{C}_{84}\text{H}_{61}\text{N}_6^+$   $[\text{M}+\text{H}]^+$ : 1153.4952, found 1153.4951.

#### IV. Single crystal X-ray structures of 4j, 4m, 5a, 6f, 6h, 6i, 6j, 6k.

Table S2. Crystal data and structure refinement for 4j

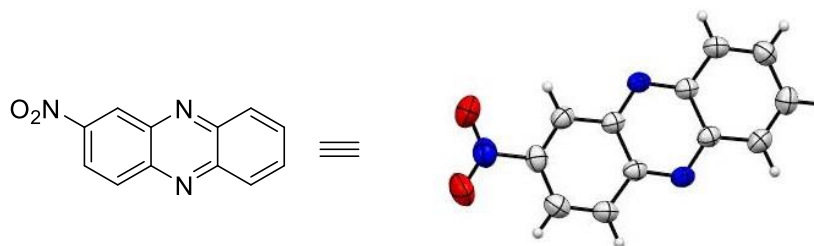

(CCDC:2041452)

|                                             |                                                               |
|---------------------------------------------|---------------------------------------------------------------|
| Identification code                         | <b>4j</b>                                                     |
| Empirical formula                           | C <sub>12</sub> H <sub>7</sub> N <sub>3</sub> O <sub>2</sub>  |
| Formula weight                              | 225.21                                                        |
| Temperature/K                               | 296.4(8)                                                      |
| Crystal system                              | monoclinic                                                    |
| Space group                                 | P2 <sub>1</sub> /c                                            |
| a/Å                                         | 6.8370(4)                                                     |
| b/Å                                         | 22.4145(11)                                                   |
| c/Å                                         | 7.1605(4)                                                     |
| $\alpha$ /°                                 | 90                                                            |
| $\beta$ /°                                  | 114.235(7)                                                    |
| $\gamma$ /°                                 | 90                                                            |
| Volume/Å <sup>3</sup>                       | 1000.63(10)                                                   |
| Z                                           | 4                                                             |
| $\rho_{\text{calc}}$ /g/cm <sup>3</sup>     | 1.495                                                         |
| $\mu$ /mm <sup>-1</sup>                     | 0.884                                                         |
| F(000)                                      | 464                                                           |
| Crystal size/mm <sup>3</sup>                | 0.5 × 0.3 × 0.02                                              |
| Radiation                                   | CuK $\alpha$ ( $\lambda$ = 1.54184)                           |
| 2 $\theta$ range for data collection/°      | 7.888 to 142.538                                              |
| Index ranges                                | -6 ≤ h ≤ 8, -27 ≤ k ≤ 27, -8 ≤ l ≤ 8                          |
| Reflections collected                       | 5414                                                          |
| Independent reflections                     | 1917 [R <sub>int</sub> = 0.0327, R <sub>sigma</sub> = 0.0253] |
| Data/restraints/parameters                  | 1917/0/154                                                    |
| Goodness-of-fit on F <sup>2</sup>           | 1.1                                                           |
| Final R indexes [I ≥ 2 $\sigma$ (I)]        | R <sub>1</sub> = 0.0702, wR <sub>2</sub> = 0.2204             |
| Final R indexes [all data]                  | R <sub>1</sub> = 0.0785, wR <sub>2</sub> = 0.2332             |
| Largest diff. peak/hole / e Å <sup>-3</sup> | 0.32/-0.30                                                    |

**Table S3. Crystal data and structure refinement for 4m**

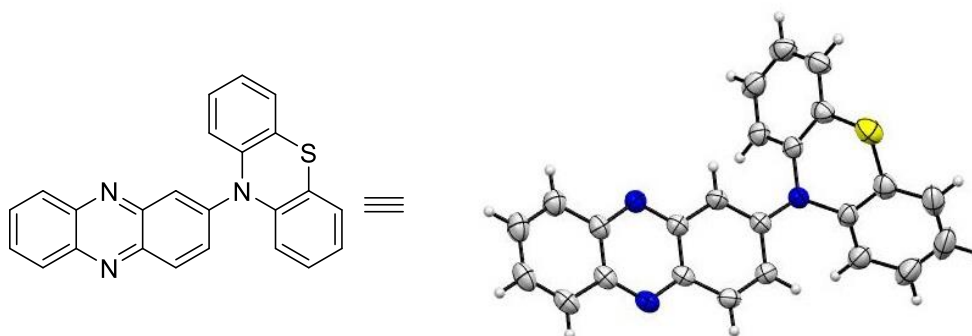

(CCDC: 2041804)

|                                             |                                                               |
|---------------------------------------------|---------------------------------------------------------------|
| Identification code                         | <b>4m</b>                                                     |
| Empirical formula                           | C <sub>24</sub> H <sub>15</sub> N <sub>3</sub> S              |
| Formula weight                              | 377.45                                                        |
| Temperature/K                               | 295.7(2)                                                      |
| Crystal system                              | monoclinic                                                    |
| Space group                                 | P2 <sub>1</sub> /c                                            |
| a/Å                                         | 10.2292(3)                                                    |
| b/Å                                         | 16.3951(5)                                                    |
| c/Å                                         | 11.6492(3)                                                    |
| α/°                                         | 90                                                            |
| β/°                                         | 113.281(4)                                                    |
| γ/°                                         | 90                                                            |
| Volume/Å <sup>3</sup>                       | 1794.60(10)                                                   |
| Z                                           | 4                                                             |
| ρ <sub>calc</sub> /cm <sup>3</sup>          | 1.397                                                         |
| μ/mm <sup>-1</sup>                          | 1.707                                                         |
| F(000)                                      | 784                                                           |
| Crystal size/mm <sup>3</sup>                | 0.6 × 0.4 × 0.1                                               |
| Radiation                                   | CuKα (λ = 1.54184)                                            |
| 2θ range for data collection/°              | 9.412 to 143.122                                              |
| Index ranges                                | -12 ≤ h ≤ 12, -19 ≤ k ≤ 19, -11 ≤ l ≤ 14                      |
| Reflections collected                       | 8706                                                          |
| Independent reflections                     | 3377 [R <sub>int</sub> = 0.0367, R <sub>sigma</sub> = 0.0353] |
| Data/restraints/parameters                  | 3377/0/253                                                    |
| Goodness-of-fit on F <sup>2</sup>           | 1.035                                                         |
| Final R indexes [I ≥ 2σ (I)]                | R <sub>1</sub> = 0.0628, wR <sub>2</sub> = 0.1660             |
| Final R indexes [all data]                  | R <sub>1</sub> = 0.0680, wR <sub>2</sub> = 0.1770             |
| Largest diff. peak/hole / e Å <sup>-3</sup> | 0.27/-0.42                                                    |



**Table S4. Crystal data and structure refinement for 5a**

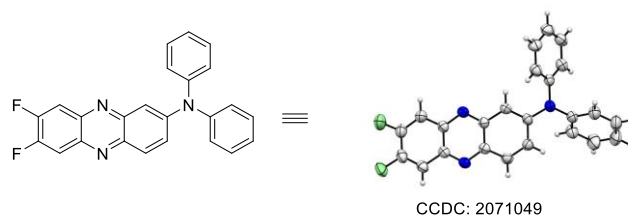

|                                             |                                                               |
|---------------------------------------------|---------------------------------------------------------------|
| Identification code                         | <b>5a</b>                                                     |
| Empirical formula                           | C <sub>24</sub> H <sub>15</sub> F <sub>2</sub> N <sub>3</sub> |
| Formula weight                              | 383.39                                                        |
| Temperature/K                               | 296.75(10)                                                    |
| Crystal system                              | orthorhombic                                                  |
| Space group                                 | Pbca                                                          |
| a/Å                                         | 7.16800(11)                                                   |
| b/Å                                         | 22.8606(4)                                                    |
| c/Å                                         | 23.0265(5)                                                    |
| α/°                                         | 90                                                            |
| β/°                                         | 90                                                            |
| γ/°                                         | 90                                                            |
| Volume/Å <sup>3</sup>                       | 3773.23(13)                                                   |
| Z                                           | 8                                                             |
| ρ <sub>calc</sub> /g/cm <sup>3</sup>        | 1.35                                                          |
| μ/mm <sup>-1</sup>                          | 0.781                                                         |
| F(000)                                      | 1584                                                          |
| Crystal size/mm <sup>3</sup>                | 0.5 × 0.3 × 0.2                                               |
| Radiation                                   | CuKα (λ = 1.54184)                                            |
| 2θ range for data collection/°              | 7.678 to 142.892                                              |
| Index ranges                                | -8 ≤ h ≤ 5, -27 ≤ k ≤ 28, -27 ≤ l ≤ 24                        |
| Reflections collected                       | 11013                                                         |
| Independent reflections                     | 3607 [R <sub>int</sub> = 0.0431, R <sub>sigma</sub> = 0.0335] |
| Data/restraints/parameters                  | 3607/0/262                                                    |
| Goodness-of-fit on F <sup>2</sup>           | 1.048                                                         |
| Final R indexes [I ≥ 2σ (I)]                | R <sub>1</sub> = 0.0662, wR <sub>2</sub> = 0.1695             |
| Final R indexes [all data]                  | R <sub>1</sub> = 0.0746, wR <sub>2</sub> = 0.1818             |
| Largest diff. peak/hole / e Å <sup>-3</sup> | 0.33/-0.46                                                    |

**Table S5. Crystal data and structure refinement for 6f**

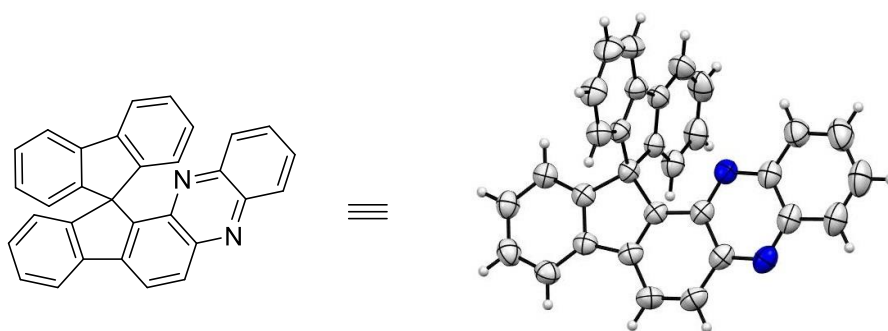

(CCDC: 2041453)

|                                                |                                                                |
|------------------------------------------------|----------------------------------------------------------------|
| Identification code                            | <b>6f</b>                                                      |
| Empirical formula                              | $C_{31}H_{18}N_2$                                              |
| Formula weight                                 | 418.47                                                         |
| Temperature/K                                  | 292.8(8)                                                       |
| Crystal system                                 | triclinic                                                      |
| Space group                                    | P-1                                                            |
| a/Å                                            | 8.2871(4)                                                      |
| b/Å                                            | 9.5533(5)                                                      |
| c/Å                                            | 14.9700(8)                                                     |
| $\alpha/^\circ$                                | 73.340(5)                                                      |
| $\beta/^\circ$                                 | 87.044(4)                                                      |
| $\gamma/^\circ$                                | 72.220(5)                                                      |
| Volume/Å <sup>3</sup>                          | 1080.34(10)                                                    |
| Z                                              | 2                                                              |
| $\rho_{\text{calc}}/\text{g cm}^{-3}$          | 1.286                                                          |
| $\mu/\text{mm}^{-1}$                           | 0.582                                                          |
| F(000)                                         | 436                                                            |
| Crystal size/mm <sup>3</sup>                   | 0.3 × 0.3 × 0.2                                                |
| Radiation                                      | CuK $\alpha$ ( $\lambda$ = 1.54184)                            |
| 2 $\Theta$ range for data collection/ $^\circ$ | 10.144 to 143.088                                              |
| Index ranges                                   | -10 ≤ h ≤ 7, -11 ≤ k ≤ 11, -18 ≤ l ≤ 18                        |
| Reflections collected                          | 9414                                                           |
| Independent reflections                        | 4092 [ $R_{\text{int}}$ = 0.0352, $R_{\text{sigma}}$ = 0.0390] |
| Data/restraints/parameters                     | 4092/0/298                                                     |
| Goodness-of-fit on F <sup>2</sup>              | 1.032                                                          |
| Final R indexes [ $I \geq 2\sigma(I)$ ]        | $R_1$ = 0.0644, $wR_2$ = 0.1739                                |
| Final R indexes [all data]                     | $R_1$ = 0.0726, $wR_2$ = 0.1916                                |
| Largest diff. peak/hole / e Å <sup>-3</sup>    | 0.21/-0.30                                                     |

**Table S6. Crystal data and structure refinement for 6h**

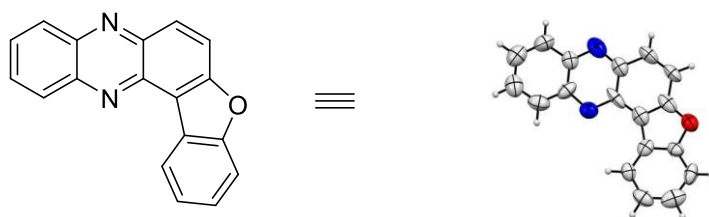

(CCDC: 2110954)

| Identification code                         | <b>6h</b>                                                     |
|---------------------------------------------|---------------------------------------------------------------|
| Empirical formula                           | C <sub>18</sub> H <sub>10</sub> N <sub>2</sub> O              |
| Formula weight                              | 270.28                                                        |
| Temperature/K                               | 302.0                                                         |
| Crystal system                              | orthorhombic                                                  |
| Space group                                 | Pna2 <sub>1</sub>                                             |
| a/Å                                         | 25.483(3)                                                     |
| b/Å                                         | 3.8577(3)                                                     |
| c/Å                                         | 25.757(3)                                                     |
| α/°                                         | 90                                                            |
| β/°                                         | 90                                                            |
| γ/°                                         | 90                                                            |
| Volume/Å <sup>3</sup>                       | 2532.1(4)                                                     |
| Z                                           | 8                                                             |
| ρ <sub>calc</sub> /cm <sup>3</sup>          | 1.418                                                         |
| μ/mm <sup>-1</sup>                          | 0.090                                                         |
| F(000)                                      | 1120.0                                                        |
| Crystal size/mm <sup>3</sup>                | 0.43 × 0.08 × 0.02                                            |
| Radiation                                   | MoKα (λ = 0.71073)                                            |
| 2θ range for data collection/°              | 4.496 to 55.08                                                |
| Index ranges                                | -33 ≤ h ≤ 33, -4 ≤ k ≤ 5, -33 ≤ l ≤ 33                        |
| Reflections collected                       | 34196                                                         |
| Independent reflections                     | 5773 [R <sub>int</sub> = 0.1241, R <sub>sigma</sub> = 0.0767] |
| Data/restraints/parameters                  | 5773/18/379                                                   |
| Goodness-of-fit on F <sup>2</sup>           | 1.038                                                         |
| Final R indexes [I ≥ 2σ (I)]                | R <sub>1</sub> = 0.0810, wR <sub>2</sub> = 0.2076             |
| Final R indexes [all data]                  | R <sub>1</sub> = 0.1727, wR <sub>2</sub> = 0.2710             |
| Largest diff. peak/hole / e Å <sup>-3</sup> | 0.80/-0.30                                                    |

**Table S7. Crystal data and structure refinement for 6i**

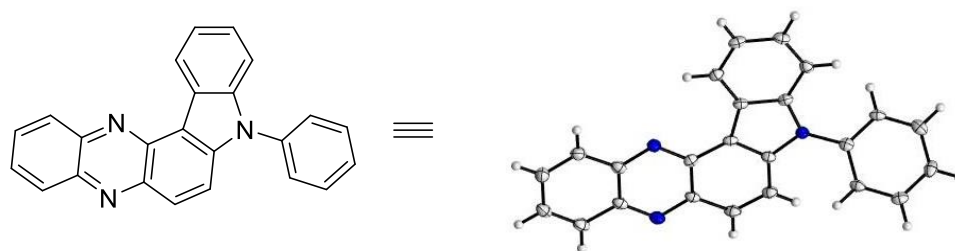

(CCDC: 2041455)

| Identification code                         | <b>6i</b>                                                     |
|---------------------------------------------|---------------------------------------------------------------|
| Empirical formula                           | C <sub>24</sub> H <sub>15</sub> N <sub>3</sub>                |
| Formula weight                              | 345.39                                                        |
| Temperature/K                               | 150.01(10)                                                    |
| Crystal system                              | orthorhombic                                                  |
| Space group                                 | P2 <sub>1</sub> 2 <sub>1</sub> 2 <sub>1</sub>                 |
| a/Å                                         | 3.91044(13)                                                   |
| b/Å                                         | 19.7705(8)                                                    |
| c/Å                                         | 21.0267(7)                                                    |
| α/°                                         | 90                                                            |
| β/°                                         | 90                                                            |
| γ/°                                         | 90                                                            |
| Volume/Å <sup>3</sup>                       | 1625.60(10)                                                   |
| Z                                           | 4                                                             |
| ρ <sub>calc</sub> /g/cm <sup>3</sup>        | 1.411                                                         |
| μ/mm <sup>-1</sup>                          | 0.661                                                         |
| F(000)                                      | 720                                                           |
| Crystal size/mm <sup>3</sup>                | 0.5 × 0.3 × 0.1                                               |
| Radiation                                   | CuKα (λ = 1.54184)                                            |
| 2θ range for data collection/°              | 8.41 to 142.858                                               |
| Index ranges                                | -4 ≤ h ≤ 2, -23 ≤ k ≤ 14, -25 ≤ l ≤ 25                        |
| Reflections collected                       | 5486                                                          |
| Independent reflections                     | 2839 [R <sub>int</sub> = 0.0365, R <sub>sigma</sub> = 0.0529] |
| Data/restraints/parameters                  | 2839/0/244                                                    |
| Goodness-of-fit on F <sup>2</sup>           | 1.044                                                         |
| Final R indexes [I ≥ 2σ (I)]                | R <sub>1</sub> = 0.0602, wR <sub>2</sub> = 0.1569             |
| Final R indexes [all data]                  | R <sub>1</sub> = 0.0636, wR <sub>2</sub> = 0.1639             |
| Largest diff. peak/hole / e Å <sup>-3</sup> | 0.26/-0.42                                                    |
| Flack parameter                             | -0.4(7)                                                       |

**Table S8. Crystal data and structure refinement for 6j**

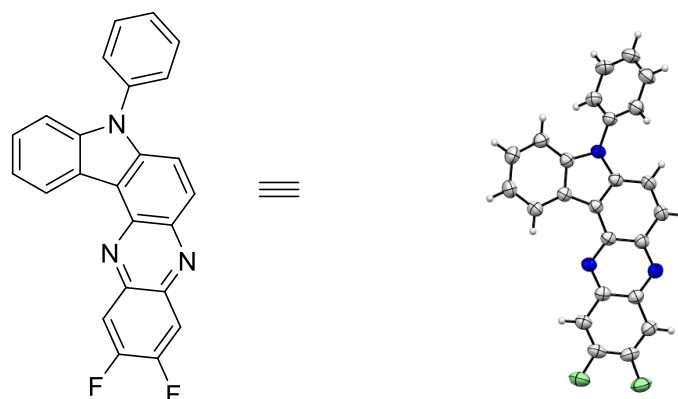

(CCDC: 2110952)

|                                             |                                                               |
|---------------------------------------------|---------------------------------------------------------------|
| Identification code                         | <b>6j</b>                                                     |
| Empirical formula                           | C <sub>24</sub> H <sub>13</sub> F <sub>2</sub> N <sub>3</sub> |
| Formula weight                              | 381.37                                                        |
| Temperature/K                               | 298.0                                                         |
| Crystal system                              | monoclinic                                                    |
| Space group                                 | P2 <sub>1</sub> /c                                            |
| a/Å                                         | 6.9727(12)                                                    |
| b/Å                                         | 21.106(2)                                                     |
| c/Å                                         | 13.7772(18)                                                   |
| α/°                                         | 90                                                            |
| β/°                                         | 120.245(3)                                                    |
| γ/°                                         | 90                                                            |
| Volume/Å <sup>3</sup>                       | 1751.6(4)                                                     |
| Z                                           | 4                                                             |
| ρ <sub>calc</sub> /cm <sup>3</sup>          | 1.446                                                         |
| μ/mm <sup>-1</sup>                          | 0.102                                                         |
| F(000)                                      | 784.0                                                         |
| Crystal size/mm <sup>3</sup>                | 0.43 × 0.19 × 0.13                                            |
| Radiation                                   | MoKα (λ = 0.71073)                                            |
| 2θ range for data collection/°              | 3.86 to 55.008                                                |
| Index ranges                                | -9 ≤ h ≤ 9, -27 ≤ k ≤ 27, -17 ≤ l ≤ 17                        |
| Reflections collected                       | 20872                                                         |
| Independent reflections                     | 4010 [R <sub>int</sub> = 0.0744, R <sub>sigma</sub> = 0.0581] |
| Data/restraints/parameters                  | 4010/0/263                                                    |
| Goodness-of-fit on F <sup>2</sup>           | 1.024                                                         |
| Final R indexes [I ≥ 2σ (I)]                | R <sub>1</sub> = 0.0488, wR <sub>2</sub> = 0.1071             |
| Final R indexes [all data]                  | R <sub>1</sub> = 0.1016, wR <sub>2</sub> = 0.1310             |
| Largest diff. peak/hole / e Å <sup>-3</sup> | 0.19/-0.16                                                    |

**Table S9. Crystal data and structure refinement for 6k**

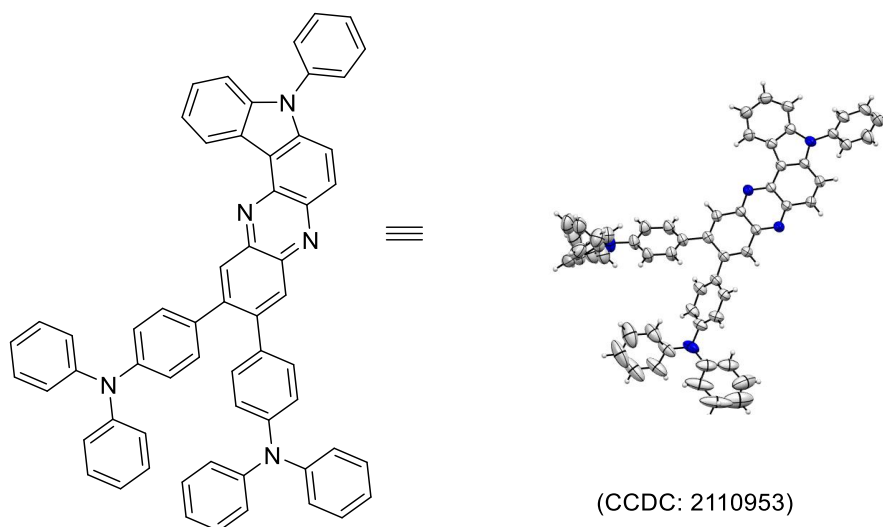

|                                             |                                                               |
|---------------------------------------------|---------------------------------------------------------------|
| Identification code                         | <b>6k</b>                                                     |
| Empirical formula                           | C <sub>60</sub> H <sub>42</sub> N <sub>5</sub>                |
| Formula weight                              | 832.98                                                        |
| Temperature/K                               | 298.0                                                         |
| Crystal system                              | monoclinic                                                    |
| Space group                                 | P2/n                                                          |
| a/Å                                         | 9.5511(3)                                                     |
| b/Å                                         | 13.5323(3)                                                    |
| c/Å                                         | 37.4313(9)                                                    |
| α/°                                         | 90                                                            |
| β/°                                         | 93.885(2)                                                     |
| γ/°                                         | 90                                                            |
| Volume/Å <sup>3</sup>                       | 4826.8(2)                                                     |
| Z                                           | 4                                                             |
| ρ <sub>calc</sub> /cm <sup>3</sup>          | 1.146                                                         |
| μ/mm <sup>-1</sup>                          | 0.521                                                         |
| F(000)                                      | 1748.0                                                        |
| Crystal size/mm <sup>3</sup>                | 0.34 × 0.04 × 0.03                                            |
| Radiation                                   | CuKα (λ = 1.54178)                                            |
| 2Θ range for data collection/°              | 4.732 to 136.76                                               |
| Index ranges                                | -11 ≤ h ≤ 11, -16 ≤ k ≤ 16, -44 ≤ l ≤ 42                      |
| Reflections collected                       | 39694                                                         |
| Independent reflections                     | 8794 [R <sub>int</sub> = 0.0744, R <sub>sigma</sub> = 0.0563] |
| Data/restraints/parameters                  | 8794/7/580                                                    |
| Goodness-of-fit on F <sup>2</sup>           | 1.127                                                         |
| Final R indexes [I ≥ 2σ (I)]                | R <sub>1</sub> = 0.0684, wR <sub>2</sub> = 0.1955             |
| Final R indexes [all data]                  | R <sub>1</sub> = 0.1030, wR <sub>2</sub> = 0.2159             |
| Largest diff. peak/hole / e Å <sup>-3</sup> | 0.40/-0.40                                                    |

## V. Mechanistic study

### i) Radical inhibition experiments

#### General procedure for the oxidative cyclization reaction of 2-aryl diazaboroles in the presence of radical scavenger

A flame-dried Schlenk tube with a magnetic stir bar was charged with 2-(*p*-tolyl)-2,3-dihydro-1*H*-benzo[*d*][1,3,2]diazaborole (**1a**, 0.2 mmol), Ag<sub>2</sub>O (4.0 equiv) and the radical scavenger. The system was evacuated thrice and back filled with N<sub>2</sub>. Next, the solvent DMSO was added *via* a syringe and the rubber septum was replaced with a stopper under N<sub>2</sub>. Then the reaction mixture was stirred at 80 °C for 24 h in an oil bath. After the reaction mixture was cooled to ambient temperature, the solvent was removed under reduced pressure. The residue was dissolved in 10 mL of CH<sub>2</sub>Cl<sub>2</sub>, filtered through a celite pad, and then washed with 20-30 mL of CH<sub>2</sub>Cl<sub>2</sub>. The combined filtrates were concentrated and purified *via* column chromatography on silica gel (100-200 mesh) to provide the desired products.

**Table S10. Oxidative cyclization reaction of 2-aryl diazaborole in the presence of radical scavenger<sup>a,b</sup>**

| 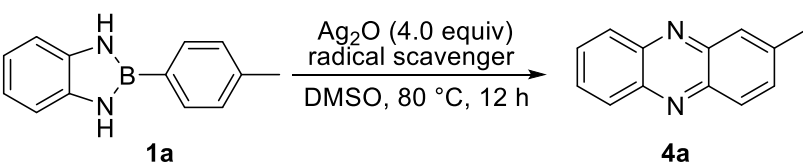 |                   |            |                        |
|--------------------------------------------------------------------------------------|-------------------|------------|------------------------|
| Entry                                                                                | Radical Scavenger | Equivalent | Yield (%) <sup>b</sup> |
| 1                                                                                    | TEMPO             | 0.5        | 70                     |
| 2                                                                                    | TEMPO             | 1.0        | 64                     |
| 3                                                                                    | TEMPO             | 2.0        | 57                     |
| 4                                                                                    | TEMPO             | 3.0        | 54                     |
| 5                                                                                    | ascorbic acid     | 0.5        | 50                     |
| 6                                                                                    | ascorbic acid     | 1.0        | 23                     |
| 7                                                                                    | ascorbic acid     | 2.0        | 0                      |
| 8                                                                                    | ascorbic acid     | 3.0        | 0                      |
| 9                                                                                    | BHT               | 0.5        | 50                     |
| 10                                                                                   | BHT               | 1.0        | 0                      |
| 11                                                                                   | BHT               | 2.0        | 0                      |
| 12                                                                                   | BHT               | 3.0        | 0                      |

<sup>a</sup>Reaction conditions: 2-aryl diazaborole (**1a**, 0.2 mmol), Ag<sub>2</sub>O (4.0 equiv) and DMSO (2.0 mL) at

80 °C for 24 h under N<sub>2</sub>. <sup>b</sup>isolated yields. TEMPO: 2,2,6,6-tetramethyl-1-piperidinyloxy; BHT: 2,6-*di-tert*-butyl-4-methylphenol.

## ii) Radical trapping experiment

### General procedure for the oxidative cyclization reaction of 2-aryl diazaborole in the presence of radical scavenger TEMPO

A flame-dried Schlenk tube with a magnetic stir bar was charged with 2-(3-methoxyphenyl)-2,3-dihydro-1*H*-benzo[*d*][1,3,2]diazaborole (**3d**, 0.2 mmol), Ag<sub>2</sub>O (4.0 equiv) and 2,2,6,6-tetramethyl-1-piperidinyloxy (TEMPO, 5.0 equiv). The system was evacuated thrice and back filled with N<sub>2</sub>. Next, the solvent DMSO was added *via* a syringe and the rubber septum was replaced with a stopper under N<sub>2</sub>. Then the reaction mixture was stirred at the 60 °C for 7 h in an oil bath. After the reaction mixture was cooled to ambient temperature, the reaction system was filtered through a celite pad, and then was detected by high resolution mass spectra.

### Scheme S6. Oxidative cyclization reaction of 2-aryl diazaborole in the presence of TEMPO<sup>a</sup>

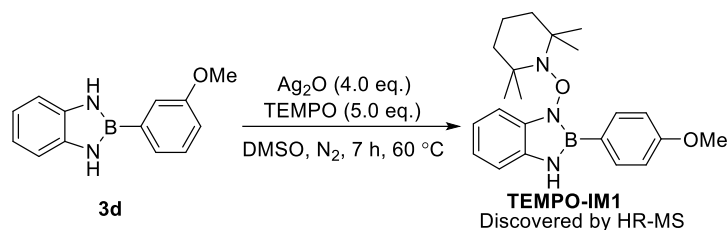

HRMS (ESI<sup>+</sup>): calcd for C<sub>22</sub>H<sub>30</sub>BN<sub>3</sub>NaO<sub>2</sub><sup>+</sup> [TEMPO-**IM1** + Na]<sup>+</sup> 402.2323, found 402.2317.

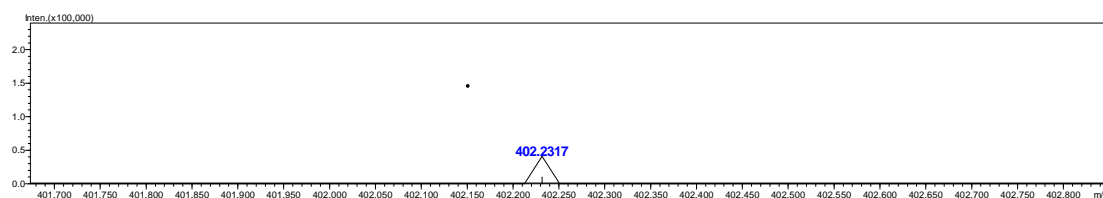

<sup>a</sup>Reaction conditions: 2-aryl diazaborole (**3d**, 0.2 mmol), Ag<sub>2</sub>O (4.0 equiv), TEMPO (5.0 equiv) and DMSO (2.0 mL) at 60 °C for 7 h under N<sub>2</sub>. TEMPO: 2,2,6,6-tetramethyl-1-piperidinyloxy.

## iii) Electron paramagnetic resonance (EPR) experiment

A flame-dried Schlenk tube with a magnetic stir bar was charged with 2-(*p*-tolyl)-2,3-



dihydro-1*H*-benzo[*d*][1,3,2]diazaborole (**1a**, 0.2 mmol), Ag<sub>2</sub>O (4.0 equiv). The system was evacuated thrice and back filled with N<sub>2</sub>. Next, the solvent DMSO was added *via* a syringe and the rubber septum was replaced with a stopper under N<sub>2</sub>. Then the reaction mixture was stirred at the 80 °C for 2 h in an oil bath. Followed by the addition of 5,5-dimethyl-1-pyrroline *N*-oxide (DMPO, 23 μL). The reaction mixture was stirred at room temperature for 10 minutes. Detected by a Bruker A300 spectrometer at room temperature. For the experimental EPR spectrum of the reaction system, instrument setting were modulation frequency: 100.00 KHz; S22 modulation amplitude: 2.00 G; sweep width: 80.0000 G; time constant: 40.960 ms; conversion: 80.000 ms; sweep time: 81.92 s; receiver gain: 1.00 × 10<sup>3</sup>. The microwave power was 18.92 mW, and the frequency was 9.439633 GHz.

**Scheme S7. EPR experiment of oxidative cyclization reaction<sup>a</sup>**

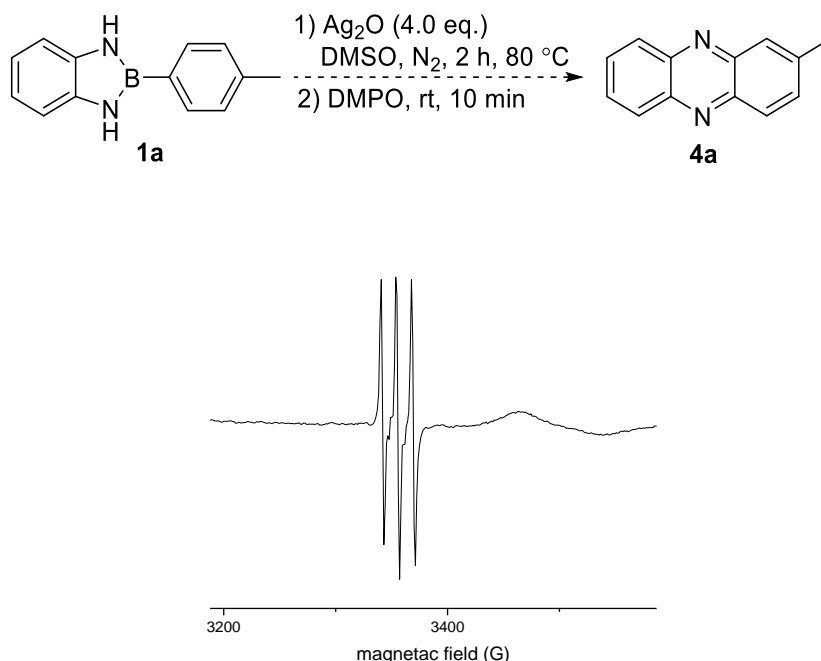

<sup>a</sup>Reaction conditions: 2-aryl diazaborole (**1a**, 0.2 mmol), Ag<sub>2</sub>O (4.0 equiv), DMPO (23 μL) and DMSO (2.0 mL) at 80 °C for 2 h under N<sub>2</sub>. DMPO: 5,5-dimethyl-1-pyrroline *N*-oxide.

**iv) Reaction intermediate monitoring experiment**

A flame-dried Schlenk tube with a magnetic stir bar was charged with 2-(3-methoxyphenyl)-2,3-dihydro-1*H*-benzo[*d*][1,3,2]diazaborole (**3d** 0.2 mmol), Ag<sub>2</sub>O (4.0 equiv). The system was evacuated thrice and back filled with N<sub>2</sub>. Next, the solvent

DMSO was added *via* a syringe and the rubber septum was replaced with a stopper under N<sub>2</sub>. Then the reaction mixture was stirred at 80 °C for 1 h in an oil bath. After the reaction mixture was cooled to ambient temperature, the reaction system was filtered through a celite pad under N<sub>2</sub> atmosphere, and then was detected by High resolution mass spectra.

#### Scheme S8. Detection of intermediate with high resolution mass

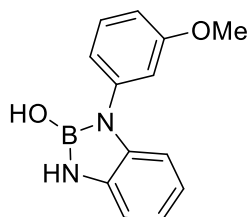

#### Intermediate **IM3**

HRMS (ESI<sup>+</sup>): calcd for C<sub>13</sub>H<sub>14</sub>BN<sub>2</sub>O<sub>2</sub><sup>+</sup> [**IM3** + H]<sup>+</sup> 241.1143, found 241.1138.

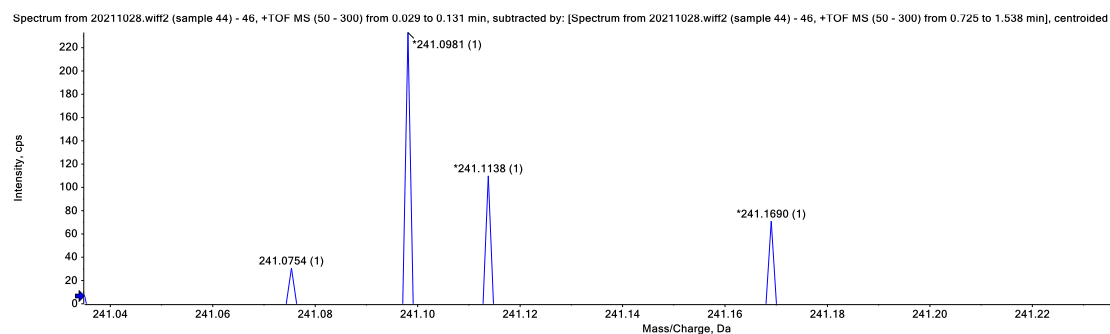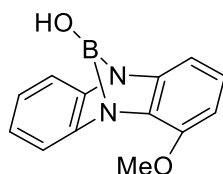

#### Intermediate **IM7**

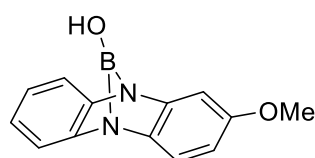

#### Intermediate **IM9**

HRMS (ESI<sup>+</sup>): calcd for C<sub>13</sub>H<sub>12</sub>BN<sub>2</sub>O<sub>2</sub><sup>+</sup> [**IM7** + H]<sup>+</sup> or [**IM9** + H]<sup>+</sup> 239.0986, found 239.0988.

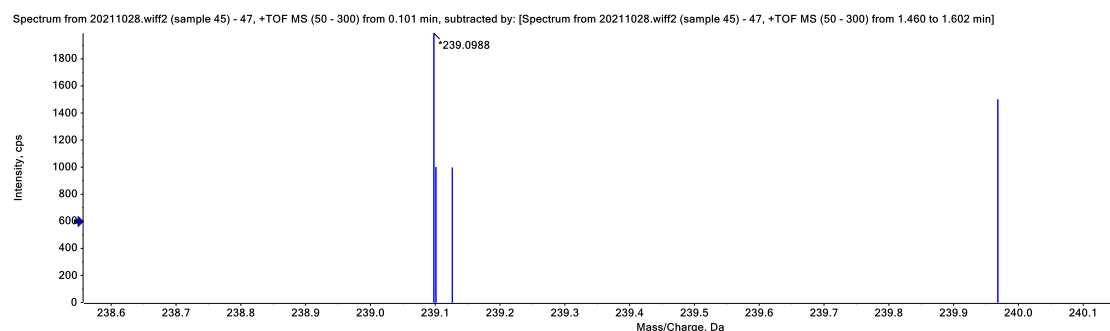

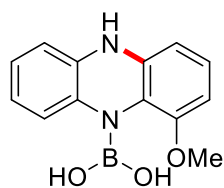

Intermediate **IM8**

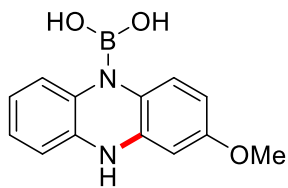

Intermediate **IM10**

HRMS (ESI<sup>+</sup>): calcd for C<sub>13</sub>H<sub>13</sub>BN<sub>2</sub>NaO<sub>3</sub><sup>+</sup> [**IM8** + H]<sup>+</sup> or [**IM10** + H]<sup>+</sup> 279.0911, found 279.0917.

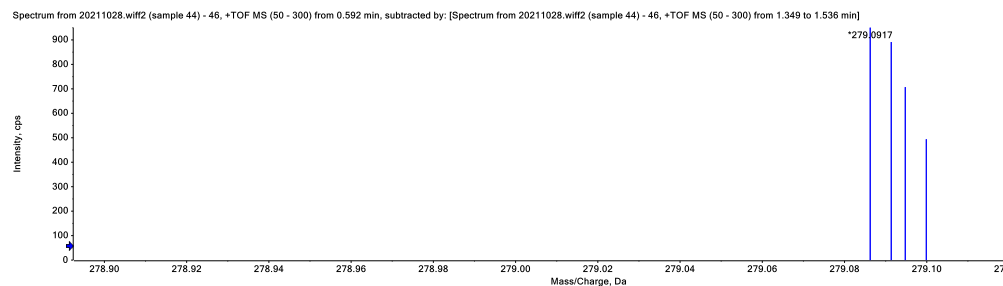

## v) Plausible mechanistic pathway

### Scheme S9. Comparative experiments

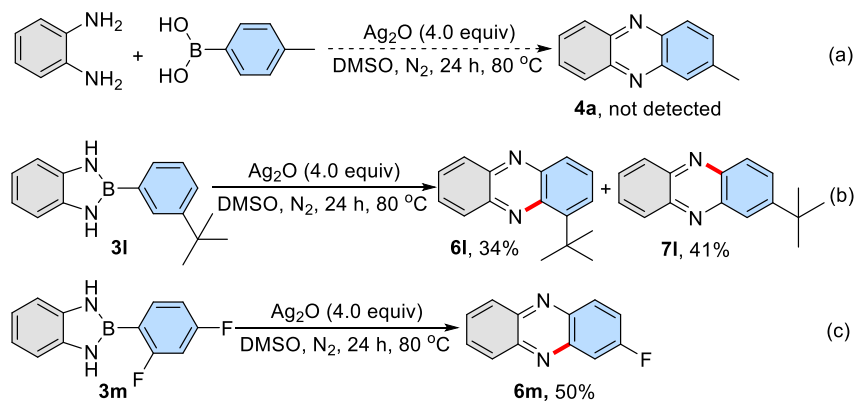

### Scheme S10. Plausible mechanistic pathway

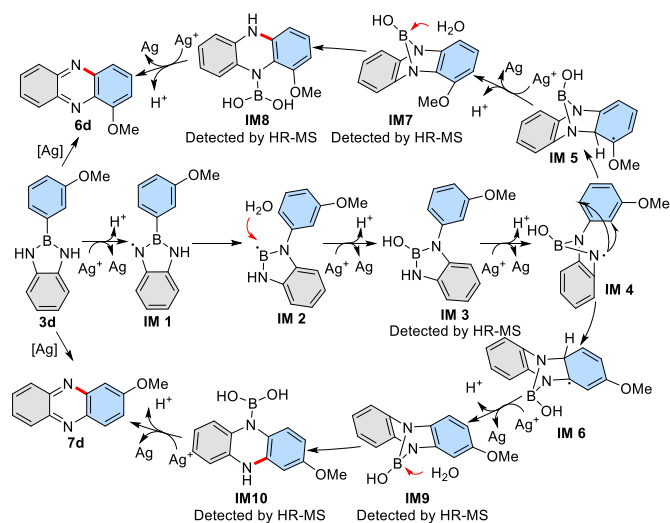

## VI. DFT calculations of local electrophilicity/nucleophilicity

The Fukui functions for electrophilic and nucleophilic attacks were calculated based on the molecular geometries optimized at the density functional theory (DFT) wB97XD/6-31G (d, p) level with solvation model based on density (SMD) in DMSO.

**Table S11. Fukui functions ( $f_k^+$ ,  $f_k^-$ ), local softness ( $s_k^+$ ,  $s_k^-$ ), and local electrophilicity indices ( $\omega_k$ ) and local nucleophilicity indices ( $N_k$ ) for selected atomic sites of 3d, using Mulliken population analysis at wB97XD/6-31 G (d, p) level**

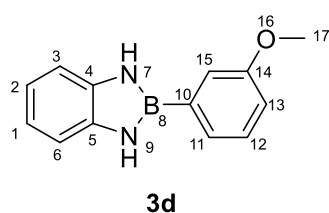

| Atom<br>( <i>k</i> ) | q(N)    | q(N+1)  | q(N-1)  | $f_k^-$ | $f_k^+$ | $s_k^-$ | $s_k^+$ | $N_k$   | $\omega_k$ |
|----------------------|---------|---------|---------|---------|---------|---------|---------|---------|------------|
| 1(C)                 | 0.0121  | -0.0854 | 0.0907  | 0.0786  | 0.0974  | 1.3839  | 1.7164  | 0.07778 | 1.0294     |
| 2(C)                 | 0.0118  | -0.0852 | 0.0903  | 0.0786  | 0.0969  | 1.3841  | 1.7072  | 0.07778 | 1.02392    |
| 3(C)                 | -0.0312 | -0.0806 | 0.0092  | 0.0404  | 0.0494  | 0.7107  | 0.8707  | 0.03994 | 0.5222     |
| 4(C)                 | 0.1127  | 0.0148  | 0.2004  | 0.0877  | 0.0979  | 1.5452  | 1.724   | 0.08684 | 1.03396    |
| 5(C)                 | 0.1125  | 0.0146  | 0.2     | 0.0875  | 0.0979  | 1.5418  | 1.7236  | 0.08665 | 1.03372    |
| 6(C)                 | -0.0315 | -0.0806 | 0.0088  | 0.0403  | 0.0491  | 0.7103  | 0.8646  | 0.03992 | 0.51852    |
| 7(N)                 | -0.0789 | -0.1404 | -0.0039 | 0.075   | 0.0614  | 1.3218  | 1.0822  | 0.07428 | 0.64907    |
| 8(B)                 | 0.2134  | 0.1253  | 0.2765  | 0.0631  | 0.0881  | 1.1117  | 1.552   | 0.06247 | 0.93079    |
| 9(N)                 | -0.0794 | -0.1404 | -0.0041 | 0.0753  | 0.061   | 1.3263  | 1.074   | 0.07454 | 0.64414    |
| 10(C)                | -0.0824 | -0.0872 | -0.0628 | 0.0196  | 0.0048  | 0.3449  | 0.0844  | 0.01938 | 0.05063    |
| 11(C)                | -0.0485 | -0.065  | -0.0179 | 0.0306  | 0.0165  | 0.5397  | 0.2903  | 0.03033 | 0.17411    |
| 12(C)                | -0.0441 | -0.0534 | -0.028  | 0.0161  | 0.0094  | 0.2834  | 0.1652  | 0.01593 | 0.09906    |
| 13(C)                | -0.056  | -0.0754 | -0.0177 | 0.0383  | 0.0194  | 0.6743  | 0.341   | 0.03789 | 0.2045     |
| 14(C)                | 0.0721  | 0.0654  | 0.0839  | 0.0118  | 0.0067  | 0.2085  | 0.1187  | 0.01172 | 0.07121    |
| 15(C)                | -0.0509 | -0.0678 | -0.0268 | 0.024   | 0.0169  | 0.4231  | 0.2979  | 0.02377 | 0.17869    |
| 16(O)                | -0.1477 | -0.1507 | -0.142  | 0.0057  | 0.003   | 0.1007  | 0.0525  | 0.00566 | 0.03148    |
| 17(C)                | 0.0077  | 0.0061  | 0.0103  | 0.0026  | 0.0016  | 0.0455  | 0.0287  | 0.00256 | 0.01722    |

**Table S12. Fukui functions ( $f_k^+$ ,  $f_k^-$ ), local softness ( $s_k^+$ ,  $s_k^-$ ), and local electrophilicity indices ( $\omega_k$ ) and local nucleophilicity indices ( $N_k$ ) for selected atomic sites of **3f**, using Mulliken population analysis at wB97XD/6-31 G (d, p) level**

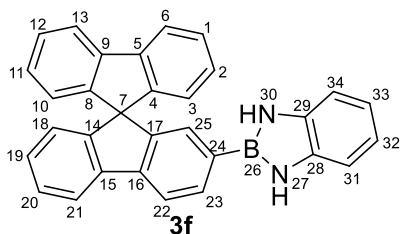

| Atom<br>( <i>k</i> ) | q(N)    | q(N+1)  | q(N-1)  | $f_k^-$ | $f_k^+$ | $s_k^-$ | $s_k^+$ | $N_k$   | $\omega_k$ |
|----------------------|---------|---------|---------|---------|---------|---------|---------|---------|------------|
| 1(C)                 | -0.0436 | -0.051  | -0.0388 | 0.0048  | 0.0075  | 0.0335  | 0.0524  | 0.01662 | 0.01257    |
| 2(C)                 | -0.0435 | -0.0491 | -0.0399 | 0.0036  | 0.0056  | 0.0256  | 0.039   | 0.01271 | 0.00935    |
| 3(C)                 | -0.0445 | -0.0488 | -0.0422 | 0.0024  | 0.0043  | 0.0166  | 0.0301  | 0.00822 | 0.00723    |
| 4(C)                 | -0.0022 | -0.0006 | -0.0021 | 0.0001  | -0.0016 | 0.0008  | -0.0113 | 0.0004  | -0.00272   |
| 5(C)                 | -0.0121 | -0.0163 | -0.0091 | 0.003   | 0.0042  | 0.021   | 0.0293  | 0.01042 | 0.00703    |
| 6(C)                 | -0.044  | -0.0495 | -0.0409 | 0.0031  | 0.0055  | 0.0219  | 0.0386  | 0.01088 | 0.00925    |
| 7(C)                 | 0.0188  | 0.0146  | 0.0211  | 0.0023  | 0.0041  | 0.0163  | 0.0289  | 0.00811 | 0.00693    |
| 8(C)                 | -0.0023 | -0.0006 | -0.0021 | 0.0002  | -0.0016 | 0.0012  | -0.0113 | 0.00058 | -0.00271   |
| 9(C)                 | -0.0122 | -0.0163 | -0.0091 | 0.003   | 0.0042  | 0.0214  | 0.0293  | 0.01061 | 0.00701    |
| 10(C)                | -0.0446 | -0.049  | -0.0422 | 0.0024  | 0.0043  | 0.017   | 0.0303  | 0.00845 | 0.00728    |
| 11(C)                | -0.0437 | -0.0492 | -0.04   | 0.0037  | 0.0055  | 0.0257  | 0.0389  | 0.01275 | 0.00933    |
| 12(C)                | -0.0437 | -0.0511 | -0.0388 | 0.0048  | 0.0074  | 0.034   | 0.0523  | 0.01689 | 0.01253    |
| 13(C)                | -0.0441 | -0.0496 | -0.041  | 0.0031  | 0.0055  | 0.022   | 0.0385  | 0.0109  | 0.00923    |
| 14(C)                | -0.0013 | -0.0281 | 0.0131  | 0.0144  | 0.0267  | 0.1013  | 0.1878  | 0.05028 | 0.04502    |
| 15(C)                | -0.012  | -0.0516 | 0.0004  | 0.0124  | 0.0396  | 0.087   | 0.2783  | 0.04317 | 0.06672    |
| 16(C)                | -0.0089 | -0.0692 | 0.0236  | 0.0324  | 0.0603  | 0.2278  | 0.4238  | 0.11304 | 0.10161    |
| 17(C)                | -0.0032 | -0.0339 | 0.0129  | 0.016   | 0.0307  | 0.1124  | 0.2158  | 0.05579 | 0.05175    |
| 18(C)                | -0.0443 | -0.0801 | -0.0339 | 0.0104  | 0.0358  | 0.0731  | 0.2516  | 0.03629 | 0.06031    |
| 19(C)                | -0.0425 | -0.1085 | -0.0177 | 0.0248  | 0.066   | 0.1743  | 0.4636  | 0.08648 | 0.11114    |
| 20(C)                | -0.0431 | -0.0751 | -0.0291 | 0.0141  | 0.032   | 0.0988  | 0.2246  | 0.04903 | 0.05384    |
| 21(C)                | -0.0431 | -0.0958 | -0.0262 | 0.0169  | 0.0527  | 0.1186  | 0.3702  | 0.05885 | 0.08875    |
| 22(C)                | -0.0447 | -0.1004 | -0.024  | 0.0207  | 0.0557  | 0.1456  | 0.3909  | 0.07226 | 0.09371    |
| 23(C)                | -0.0385 | -0.0799 | -0.0102 | 0.0283  | 0.0414  | 0.1984  | 0.2907  | 0.09847 | 0.06969    |
| 24(C)                | -0.0763 | -0.1481 | -0.0515 | 0.0248  | 0.0719  | 0.1741  | 0.5047  | 0.08642 | 0.12099    |
| 25(C)                | -0.0402 | -0.0884 | -0.0203 | 0.0199  | 0.0482  | 0.1399  | 0.3384  | 0.06942 | 0.08114    |
| 26(B)                | 0.1179  | 0.0682  | 0.1682  | 0.0504  | 0.0496  | 0.3538  | 0.3486  | 0.17558 | 0.08359    |
| 27(N)                | -0.1332 | -0.1472 | -0.0845 | 0.0486  | 0.0141  | 0.3416  | 0.0987  | 0.16953 | 0.02366    |

|       |         |         |         |        |        |        |        |         |         |
|-------|---------|---------|---------|--------|--------|--------|--------|---------|---------|
| 28(C) | 0.0226  | 0.0164  | 0.0844  | 0.0618 | 0.0062 | 0.4339 | 0.0437 | 0.21532 | 0.01047 |
| 29(C) | 0.0226  | 0.0165  | 0.0845  | 0.0618 | 0.0062 | 0.4343 | 0.0435 | 0.2155  | 0.01043 |
| 30(N) | -0.1332 | -0.1469 | -0.0851 | 0.0481 | 0.0138 | 0.3379 | 0.0966 | 0.16766 | 0.02317 |
| 31(C) | -0.0684 | -0.0837 | -0.0292 | 0.0392 | 0.0154 | 0.2751 | 0.1078 | 0.13652 | 0.02586 |
| 32(C) | -0.0681 | -0.0812 | 0.0019  | 0.0699 | 0.0131 | 0.4912 | 0.092  | 0.24375 | 0.02206 |
| 33(C) | -0.068  | -0.0812 | 0.0022  | 0.0702 | 0.0132 | 0.4931 | 0.093  | 0.2447  | 0.02229 |
| 34(C) | -0.0683 | -0.0836 | -0.0294 | 0.039  | 0.0153 | 0.2737 | 0.1071 | 0.13584 | 0.02568 |

**Table S13. Fukui functions ( $f_k^+$ ,  $f_k^-$ ), local softness ( $s_k^+$ ,  $s_k^-$ ), and local electrophilicity indices ( $\omega_k$ ) and local nucleophilicity indices ( $N_k$ ) for selected atomic sites of **3l**, using Mulliken population analysis at wB97XD/6-31 G (d, p) level**

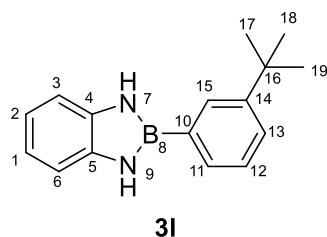

| Atom<br>( <i>k</i> ) | q(N)    | q(N+1)  | q(N-1)  | $f_k^-$ | $f_k^+$ | $s_k^-$ | $s_k^+$ | $N_k$   | $\omega_k$ |
|----------------------|---------|---------|---------|---------|---------|---------|---------|---------|------------|
| 1(C)                 | 0.0112  | -0.0856 | 0.089   | 0.0778  | 0.0968  | 1.3815  | 1.7193  | 0.0652  | 1.02259    |
| 2(C)                 | 0.0111  | -0.0856 | 0.0889  | 0.0778  | 0.0967  | 1.3812  | 1.7165  | 0.06519 | 1.0209     |
| 3(C)                 | -0.0318 | -0.081  | 0.0084  | 0.0401  | 0.0493  | 0.7126  | 0.8749  | 0.03363 | 0.52037    |
| 4(C)                 | 0.1116  | 0.0143  | 0.1983  | 0.0867  | 0.0972  | 1.54    | 1.7266  | 0.07269 | 1.02689    |
| 5(C)                 | 0.1116  | 0.0143  | 0.1985  | 0.0868  | 0.0974  | 1.5416  | 1.7287  | 0.07276 | 1.02818    |
| 6(C)                 | -0.0318 | -0.0809 | 0.0084  | 0.0402  | 0.0492  | 0.713   | 0.8734  | 0.03365 | 0.51947    |
| 7(N)                 | -0.0793 | -0.141  | -0.0039 | 0.0754  | 0.0616  | 1.3386  | 1.0946  | 0.06318 | 0.65103    |
| 8(B)                 | 0.2108  | 0.1241  | 0.2713  | 0.0606  | 0.0866  | 1.0756  | 1.5385  | 0.05077 | 0.91504    |
| 9(N)                 | -0.0796 | -0.1411 | -0.0041 | 0.0755  | 0.0615  | 1.3406  | 1.092   | 0.06327 | 0.64949    |
| 10(C)                | -0.0863 | -0.0912 | -0.0647 | 0.0216  | 0.0049  | 0.3838  | 0.0873  | 0.01812 | 0.05195    |
| 11(C)                | -0.0356 | -0.0522 | -0.0077 | 0.028   | 0.0166  | 0.4963  | 0.295   | 0.02342 | 0.17544    |
| 12(C)                | -0.0492 | -0.0586 | -0.0325 | 0.0167  | 0.0094  | 0.2966  | 0.167   | 0.014   | 0.0993     |
| 13(C)                | -0.0349 | -0.0546 | 0.0028  | 0.0377  | 0.0197  | 0.6686  | 0.3497  | 0.03156 | 0.20799    |
| 14(C)                | 0.0029  | -0.0036 | 0.0146  | 0.0117  | 0.0065  | 0.2074  | 0.1163  | 0.00979 | 0.06916    |
| 15(C)                | -0.03   | -0.0465 | -0.0031 | 0.0269  | 0.0166  | 0.4773  | 0.2945  | 0.02253 | 0.17514    |
| 16(C)                | 0.0223  | 0.0214  | 0.0239  | 0.0016  | 0.001   | 0.0282  | 0.0171  | 0.00133 | 0.01016    |
| 17(C)                | -0.0911 | -0.0921 | -0.0895 | 0.0016  | 0.001   | 0.0279  | 0.0182  | 0.00132 | 0.01085    |
| 18(C)                | -0.0928 | -0.0937 | -0.0913 | 0.0015  | 0.0009  | 0.0266  | 0.0154  | 0.00125 | 0.00915    |
| 19(C)                | -0.0928 | -0.0937 | -0.0913 | 0.0015  | 0.0009  | 0.0266  | 0.0154  | 0.00125 | 0.00915    |

## VII. Photophysical data

**Table S14:** Absorption maxima, emission maxima, stokes shifts, fluorescence quantum yields and transient decay data.

| Compd.    | $\lambda_{\text{abs}}$ (nm) <sup>a</sup> | $\lambda_{\text{em}}$ (nm) <sup>b</sup> | $\lambda_{\text{em}}$ (nm) <sup>c</sup> | $(\Phi_f)$ <sup>d</sup> | $\tau$ <sup>e</sup> |
|-----------|------------------------------------------|-----------------------------------------|-----------------------------------------|-------------------------|---------------------|
|           | in CH <sub>2</sub> Cl <sub>2</sub>       | in CH <sub>2</sub> Cl <sub>2</sub>      | in film                                 | in film                 | ( $\mu$ s)          |
| <b>5a</b> | 302, 486                                 | 624                                     | 607                                     | 0.19                    | 6.6                 |
| <b>5d</b> | 326, 502                                 | 607                                     | 674                                     | 0.16                    | 2.5                 |
| <b>5f</b> | 328, 515                                 | -                                       | 674                                     | 0.17                    | 2.5                 |
| <b>5g</b> | 317, 480                                 | 690                                     | 635                                     | 0.12                    | 4.5                 |
| <b>5j</b> | 346, 525                                 | 668                                     | 668                                     | 0.02                    | 0.0062              |
| <b>5k</b> | 287, 479                                 | 666                                     | 630                                     | 0.07                    | 11                  |
| <b>8a</b> | 297, 340, 507                            | 651                                     | 610                                     | 0.16                    | 1.8                 |
| <b>8b</b> | 288, 303, 409                            | 527                                     | 533                                     | 0.08                    | 2.5                 |
| <b>8c</b> | 316, 503                                 | 611                                     | 607                                     | 0.06                    | 0.036               |
| <b>8d</b> | 326, 489                                 | 661                                     | 616                                     | 0.20                    | 8.5                 |

<sup>a</sup>Absorption maximum in CH<sub>2</sub>Cl<sub>2</sub> at  $1 \times 10^{-5}$  mol/L. <sup>b</sup>Emission maximum in CH<sub>2</sub>Cl<sub>2</sub> at  $1 \times 10^{-5}$  mol/L. <sup>c</sup>Emission maximum in film. <sup>d</sup>Absolute quantum yield determined in mCBP films (10 wt%) at room temperature. <sup>e</sup>Photoluminescence transient decay curves in neat film.

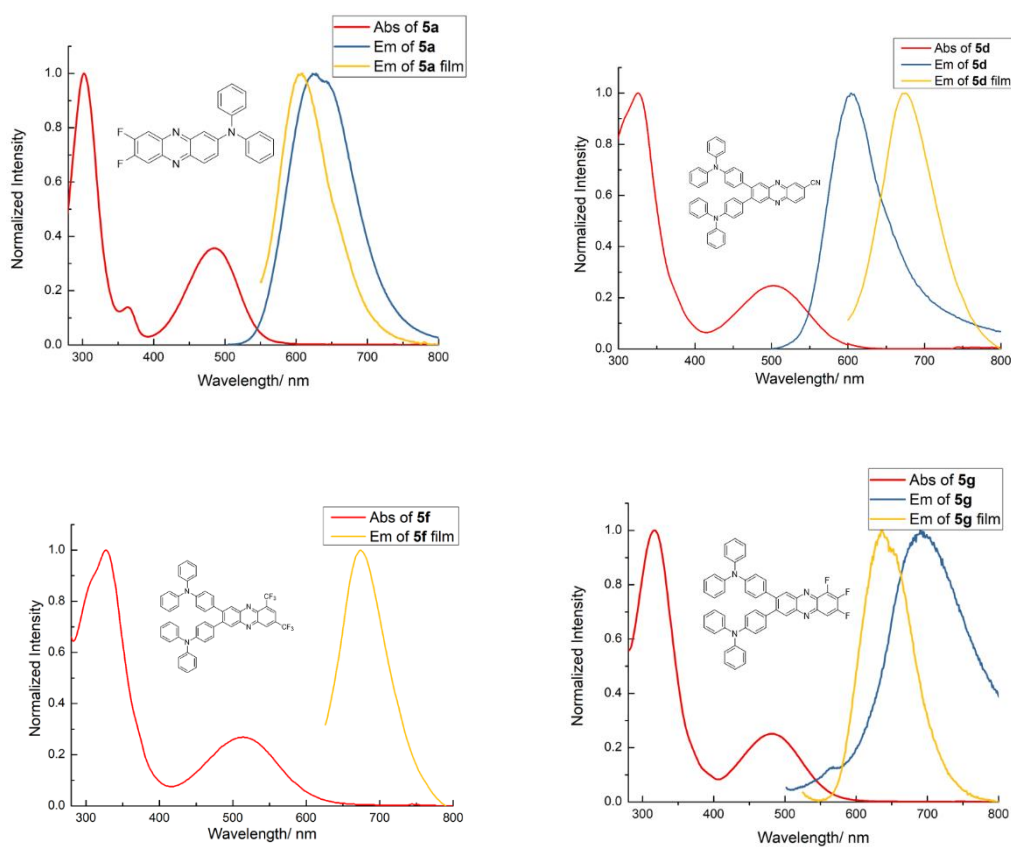

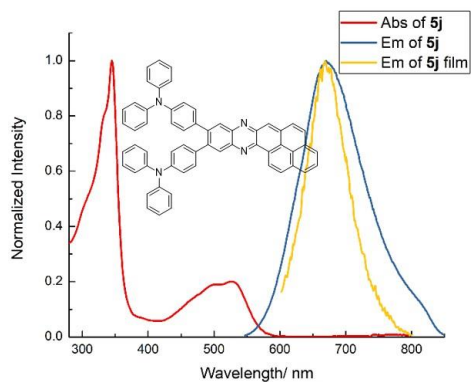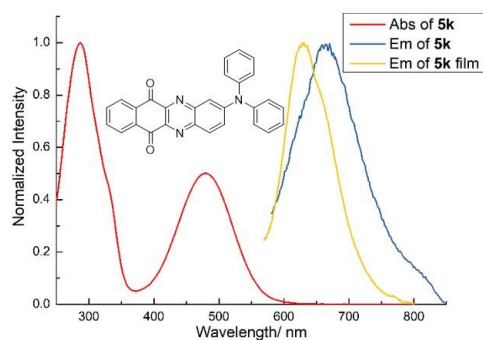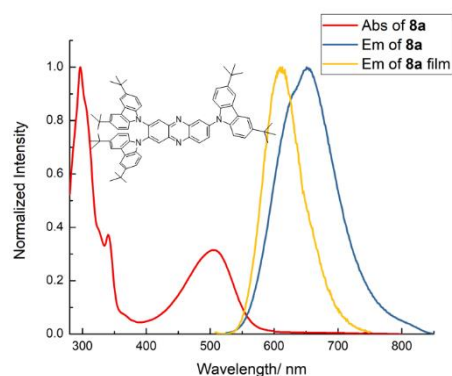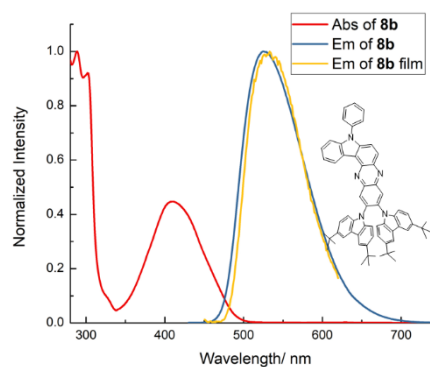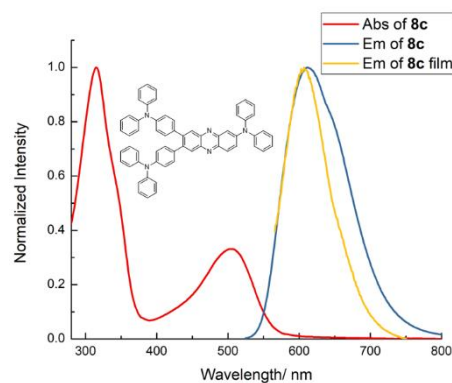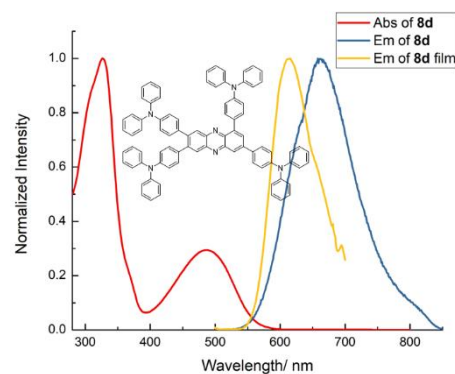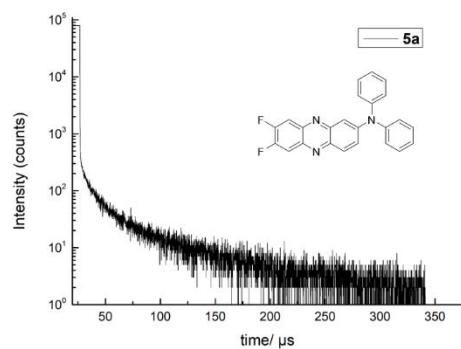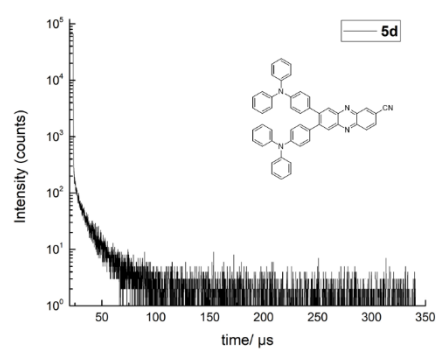



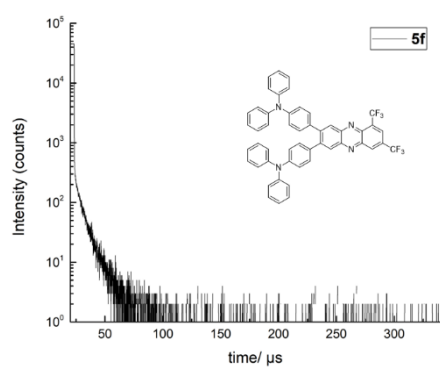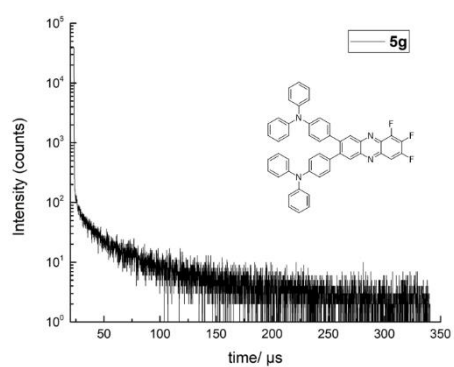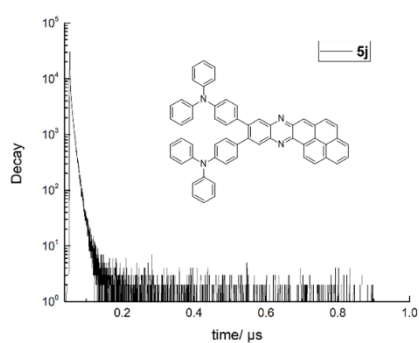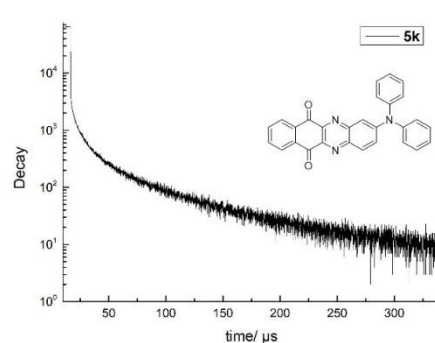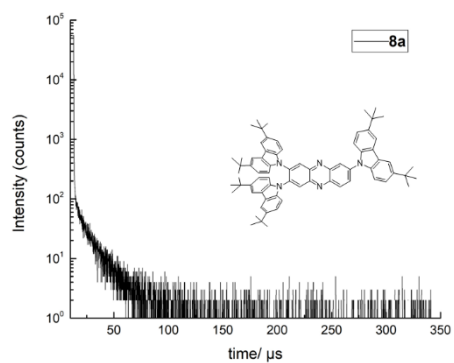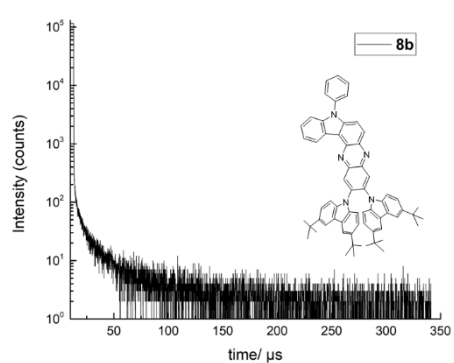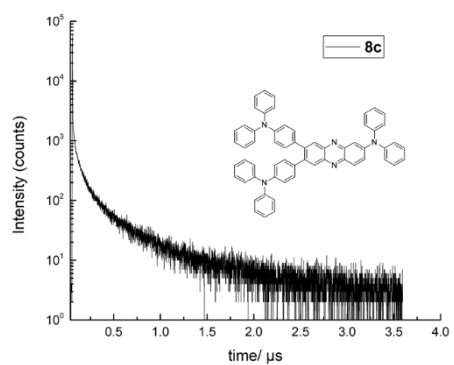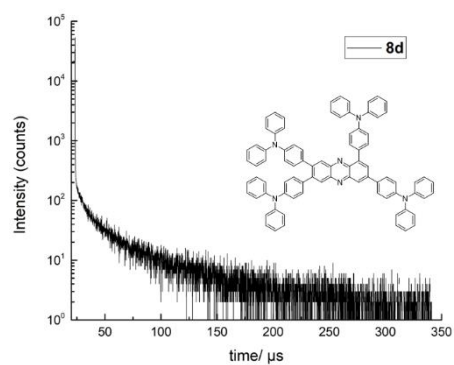

## VII. References

1. (a) S. Ha, Y. Lee, Y. Kwak, A. Mishra, E. Yu, B. Ryou and C.-M. Park, *Nat. Commun.*, 2020, **11**, 2509. (b) C. Liu, P. Zhao and W. Huang, *Open Chem.*, 2007, **5**, 303-315. (c) J. A. Christensen, B. T. Phelan, S. Chaudhuri, A. Acharya, V. S. Batista and M. R. Wasielewski, *J. Am. Chem. Soc.*, 2018, **140**, 5290-5299.
2. (a) W.-M. Wan, D. Tian, Y.-N. Jing, X.-Y. Zhang, W. Wu, H. Ren and H.-L. Bao, *Angew. Chem., Int. Ed.*, 2018, **57**, 15510-15516. (b) C.-W. Ju, B. Li, L. Li, W. Yan, C. Cui, X. Ma and D. Zhao, *J. Am. Chem. Soc.*, 2021, **143**, 5903-5916. (c) A. R. Goldberg and B. H. Northrop, *J. Org. Chem.*, 2016, **81**, 969-980.
3. (a) F. B. Mortzfeld, J. Pietruszka and I. R. Baxendale, *Eur. J. Org. Chem.*, 2019, 5424-5433. (b) C. Chen, K. C. Chong, Y. Pan, G. Qi, S. Xu and B. Liu, *ACS Mater. Lett.*, 2021, **3**, 1081-1087.
4. (a) M. Tietze, A. Iglesias, E. Merisor, J. Conrad, I. Klaiber and U. Beifuss, *Org. Lett.*, 2005, **7**, 1549-1552. (b) N. V. Borrero, F. Bai, C. Perez, B. Q. Duong, J. R. Rocca, S. Jin and R. W. Huigens, *Org. Biomol. Chem.*, 2014, **12**, 881-886.
5. (a) X.-Y. Wang, H.-R. Lin, T. Lei, D.-C. Yang, F.-D. Zhuang, J.-Y. Wang, S. C. Yuan and J. Pei, *Angew. Chem., Int. Ed.*, 2013, **52**, 3117-3120. (b) C.-J. Sun, G. Meng, Y. Li, N. Wang, P. Chen, S. Wang and X. Yin, *Inorg. Chem.*, 2021, **60**, 1099-1106.

## VIII. Copies of NMR spectra

PROTON\_01

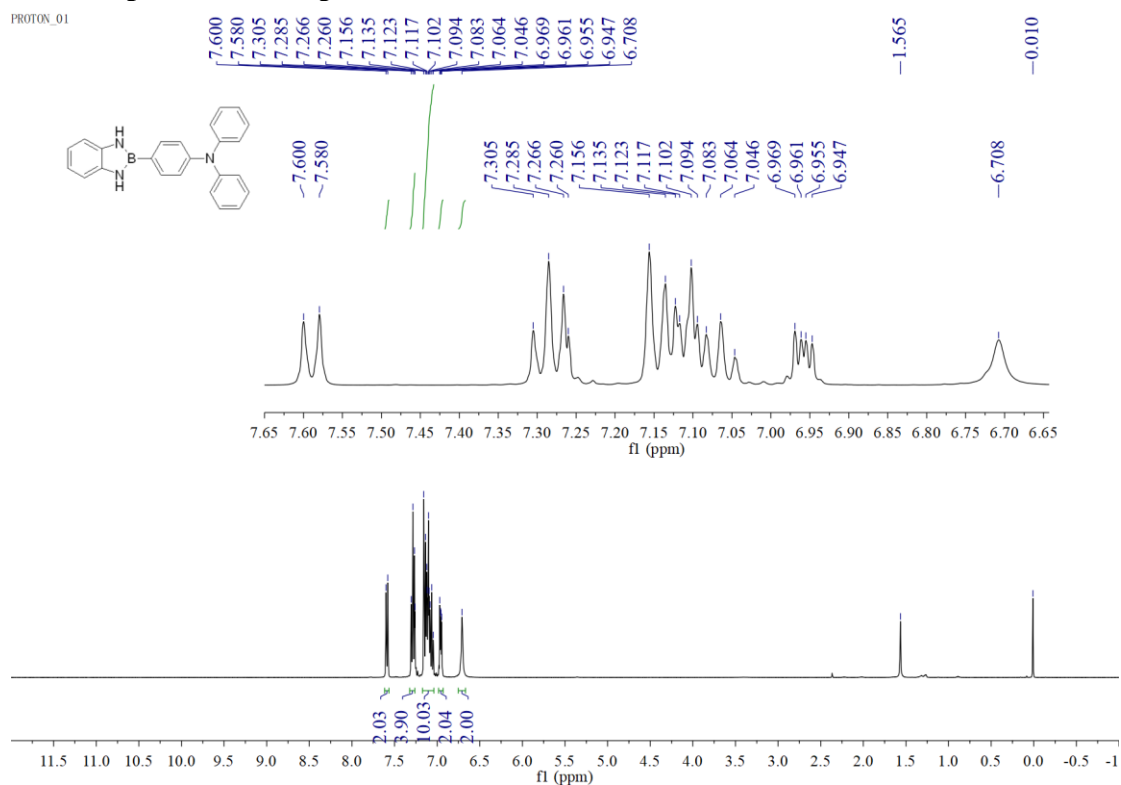

<sup>1</sup>H NMR spectrum of **1k** in CDCl<sub>3</sub>

CARBON\_01

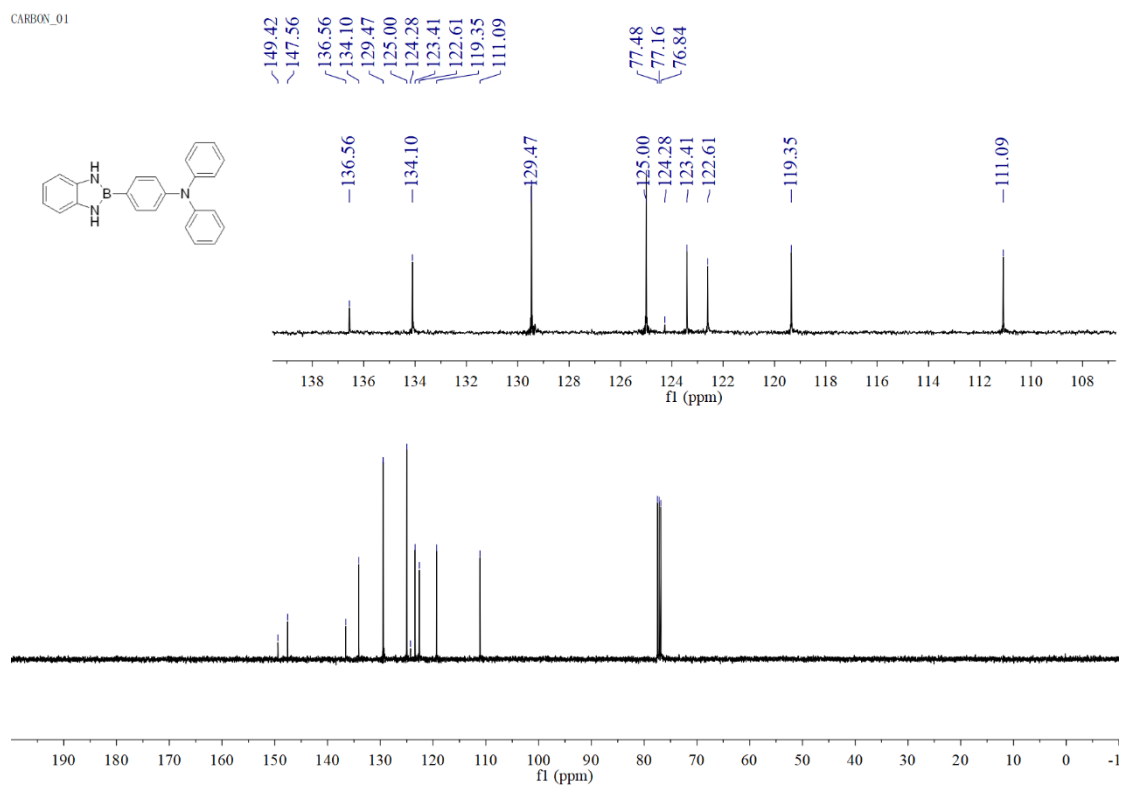

<sup>13</sup>C NMR spectrum of **1k** in CDCl<sub>3</sub>

PROTON\_01

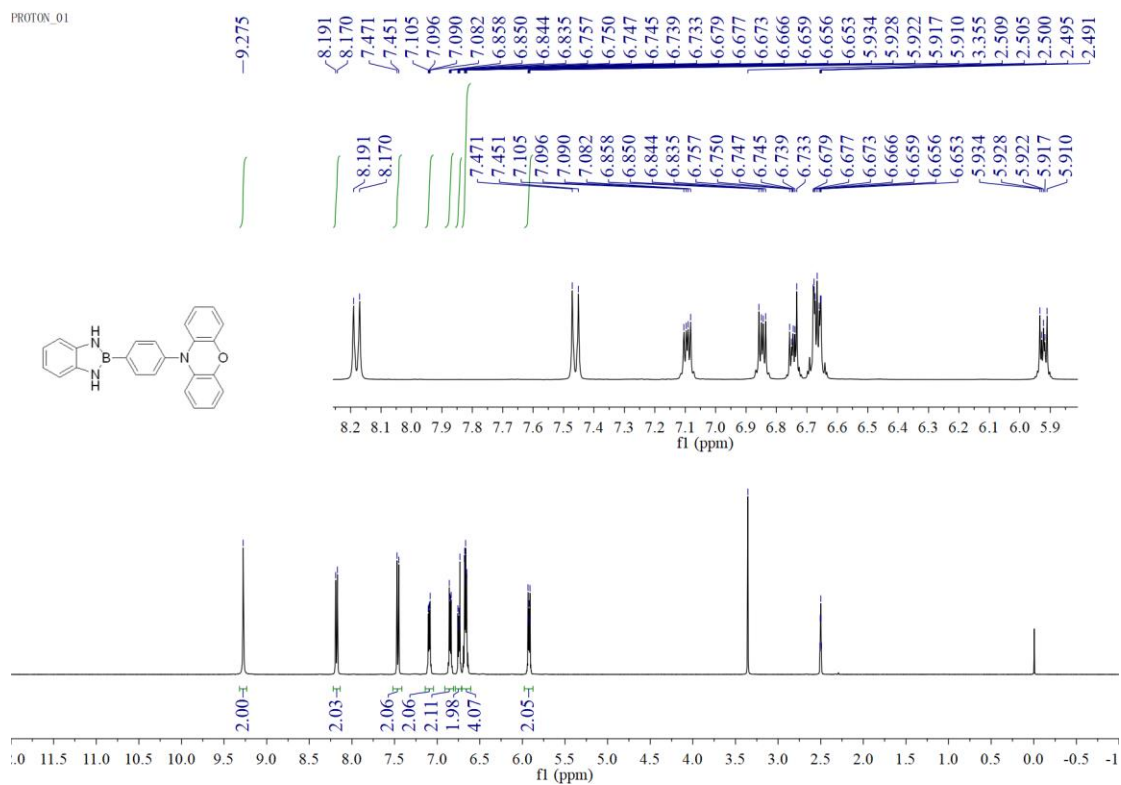

<sup>1</sup>H NMR spectrum of **1n** in CDCl<sub>3</sub>

CARBON\_01

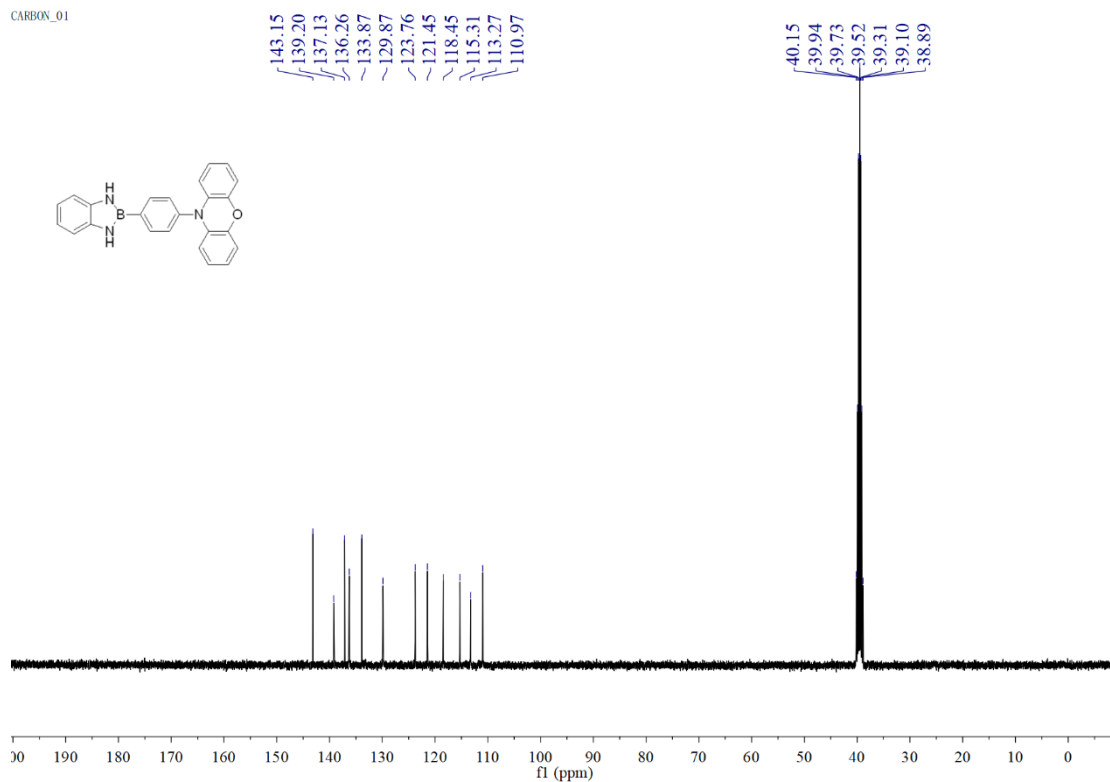

<sup>13</sup>C NMR spectrum of **1n** in CDCl<sub>3</sub>

PROTON\_01

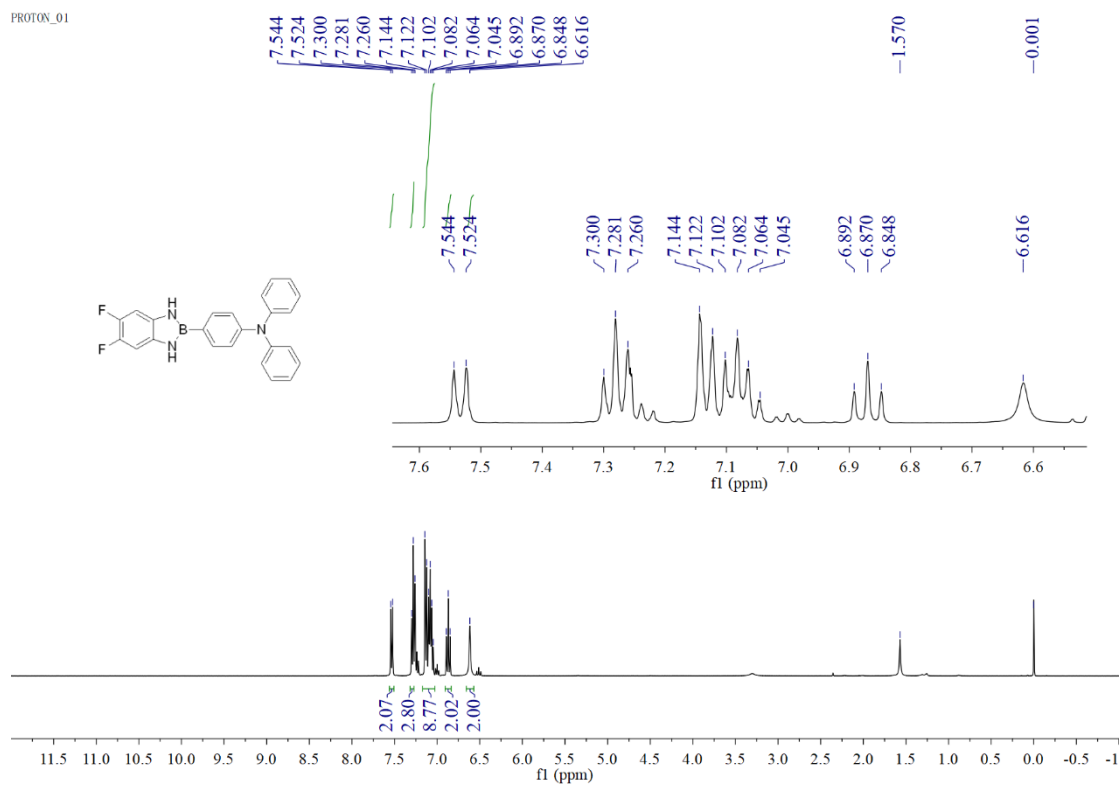

<sup>1</sup>H NMR spectrum of **2a** in CDCl<sub>3</sub>

CARBON\_01

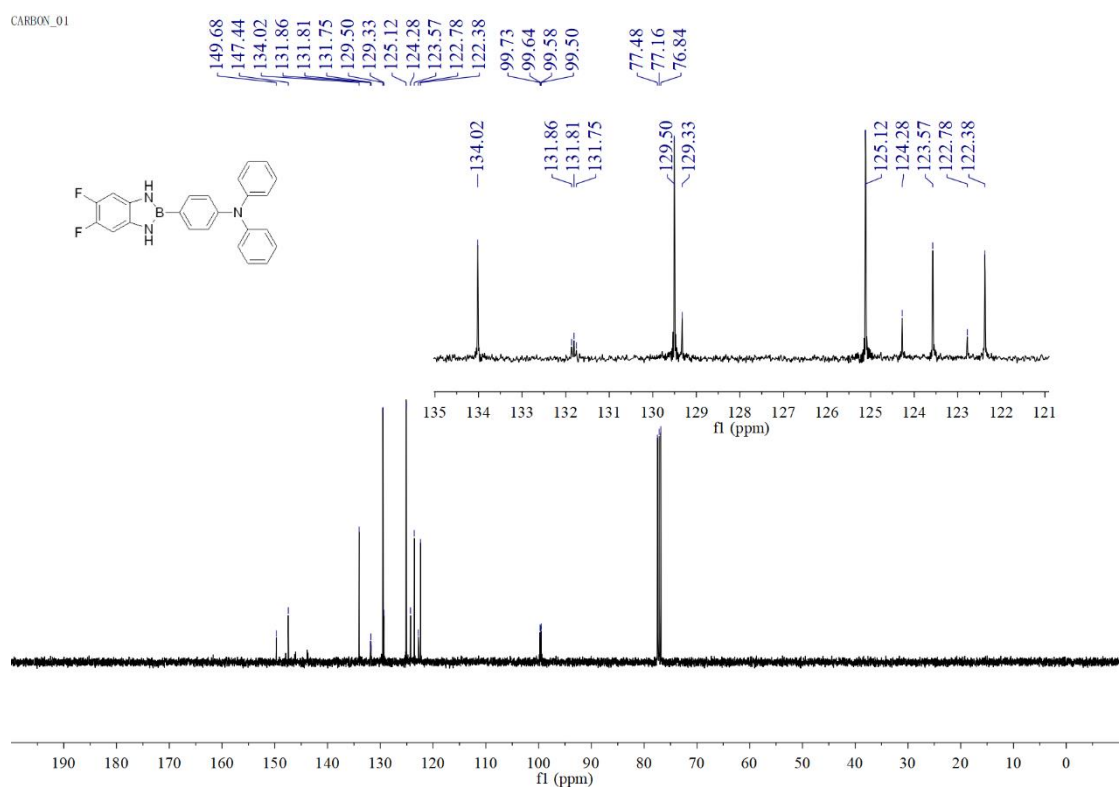

<sup>13</sup>C NMR spectrum of **2a** in CDCl<sub>3</sub>

PROTON\_01

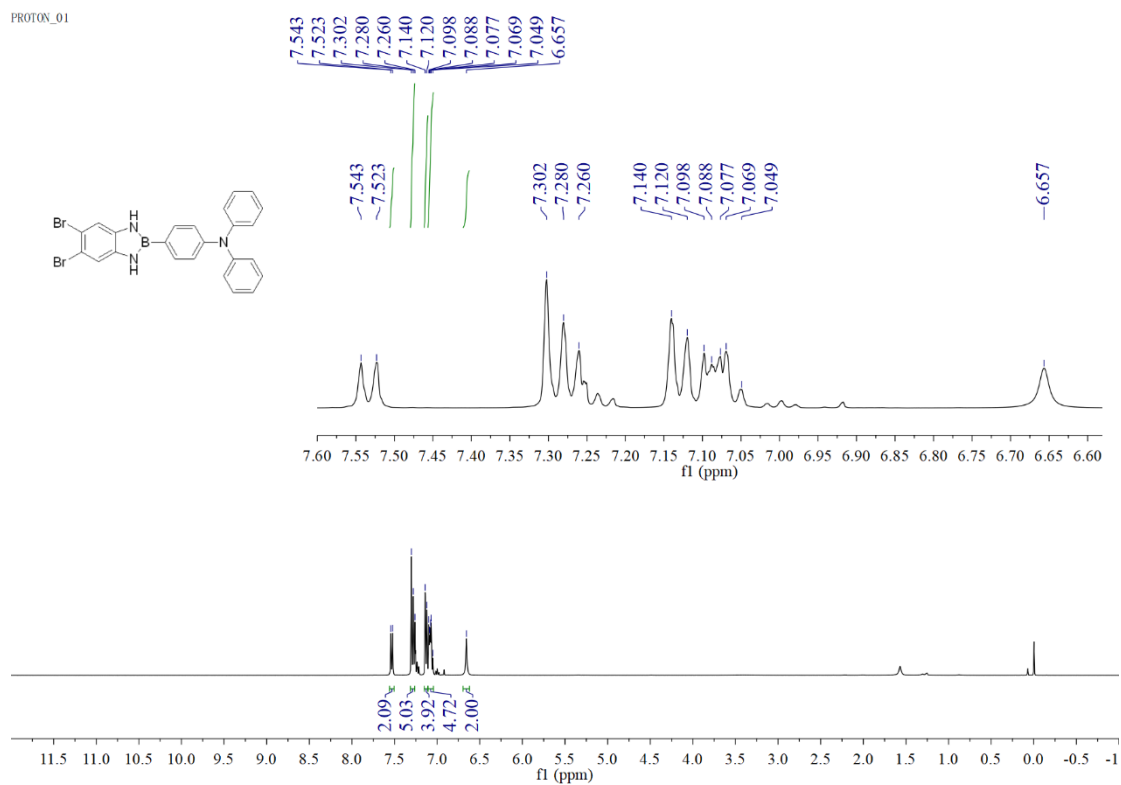

<sup>1</sup>H NMR spectrum of **2c** in CDCl<sub>3</sub>

CARBON\_01

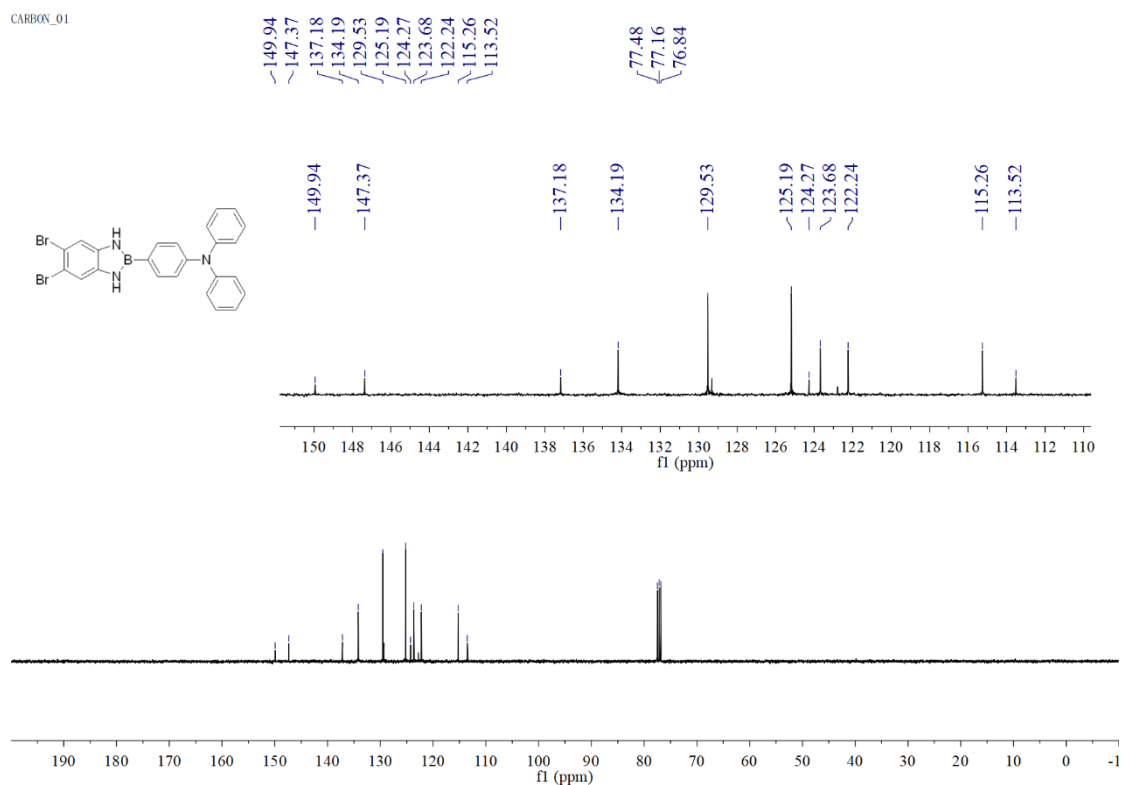

<sup>13</sup>C NMR spectrum of **2c** in CDCl<sub>3</sub>

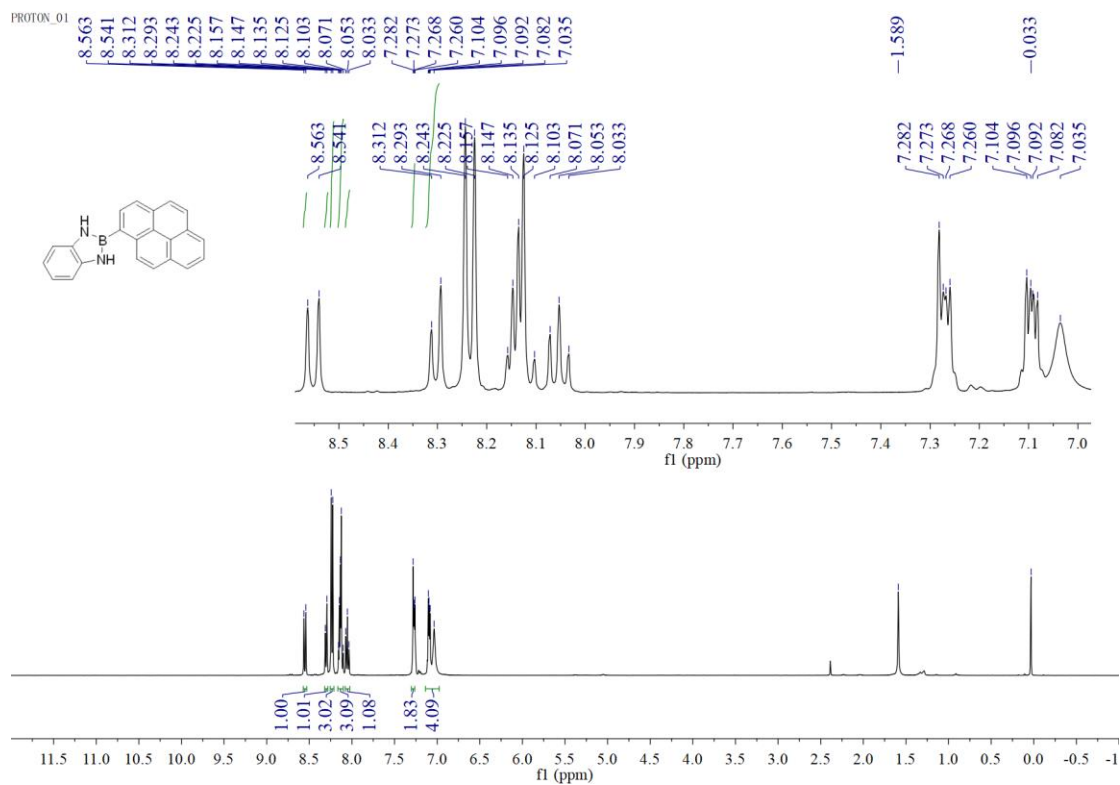

<sup>1</sup>H NMR spectrum of **2i** in CDCl<sub>3</sub>

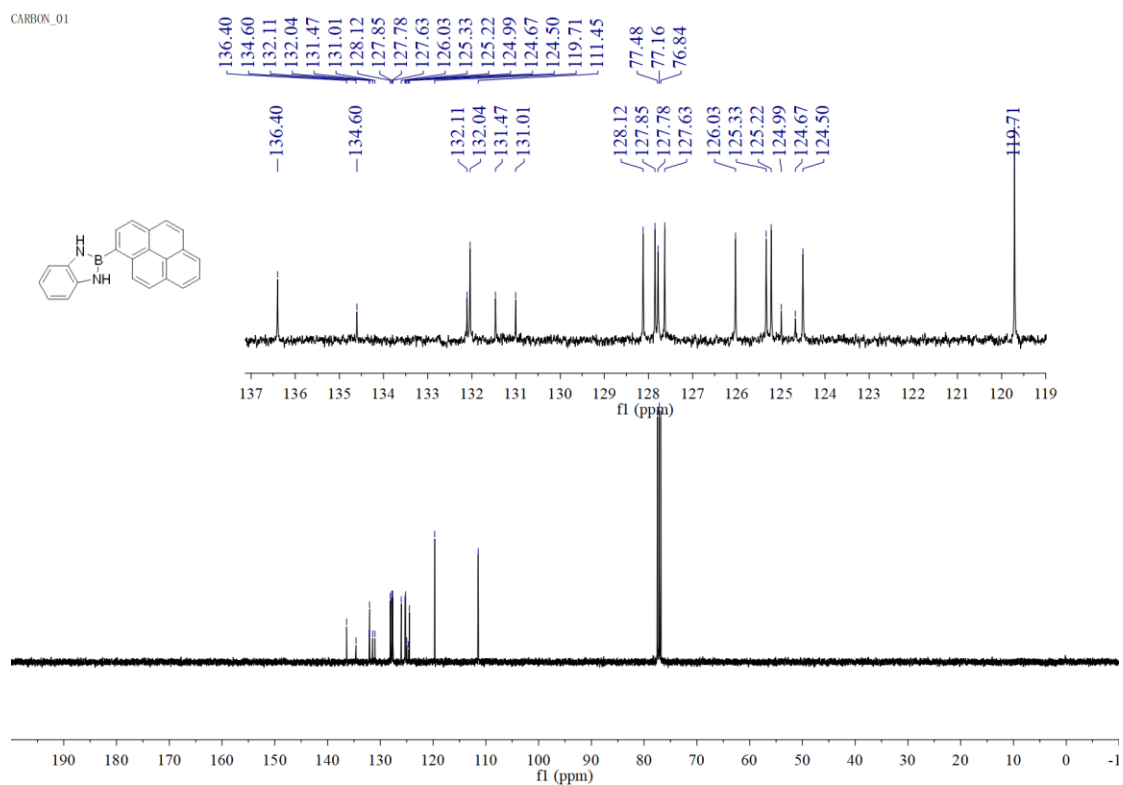

<sup>13</sup>C NMR spectrum of **2i** in CDCl<sub>3</sub>

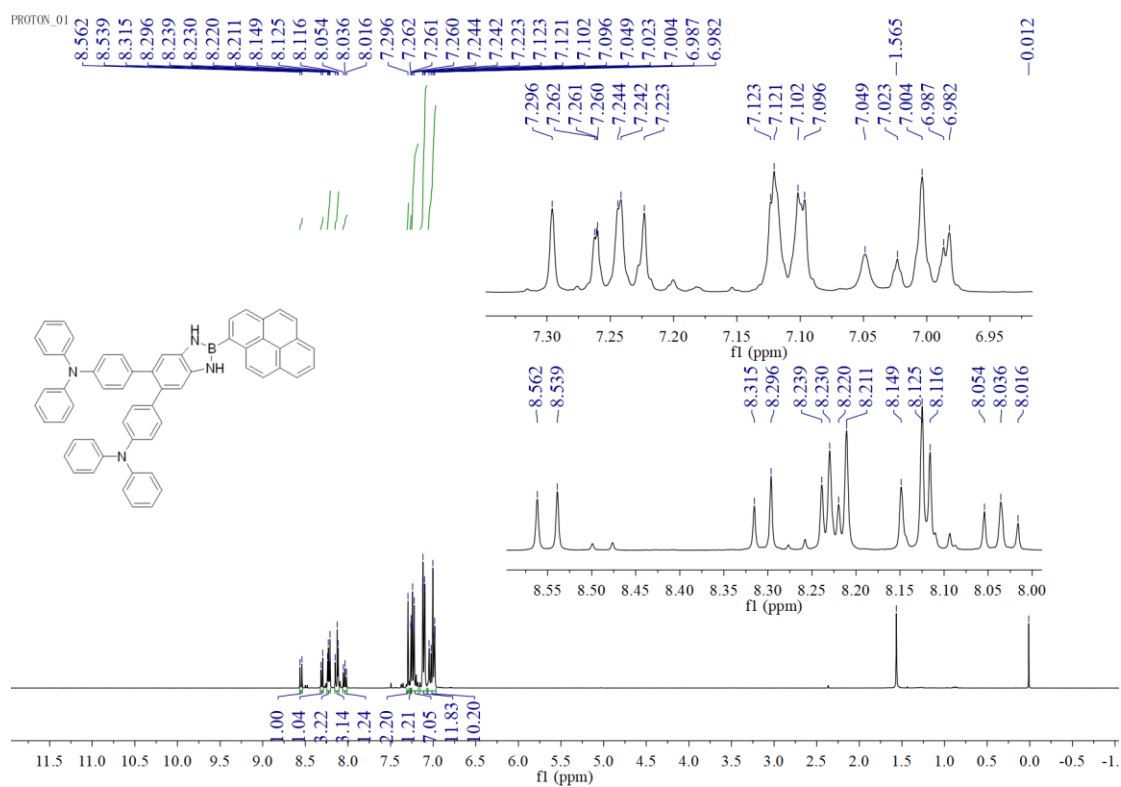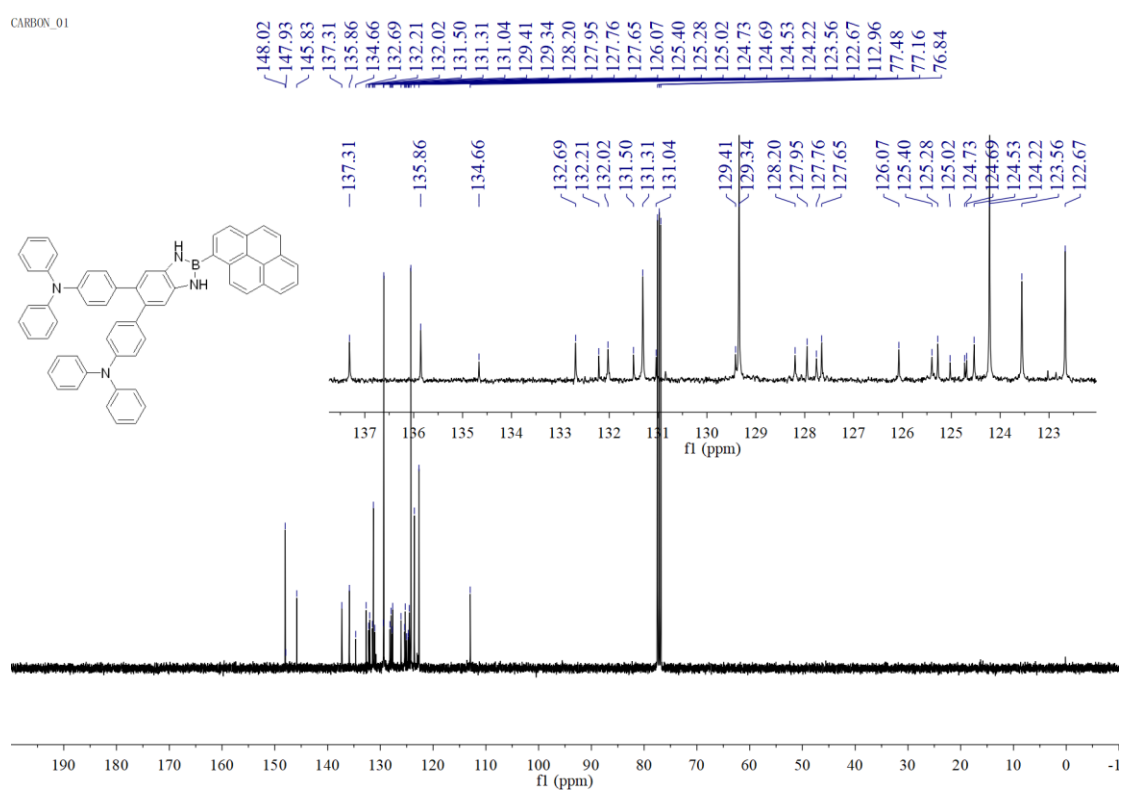



PROTON\_01

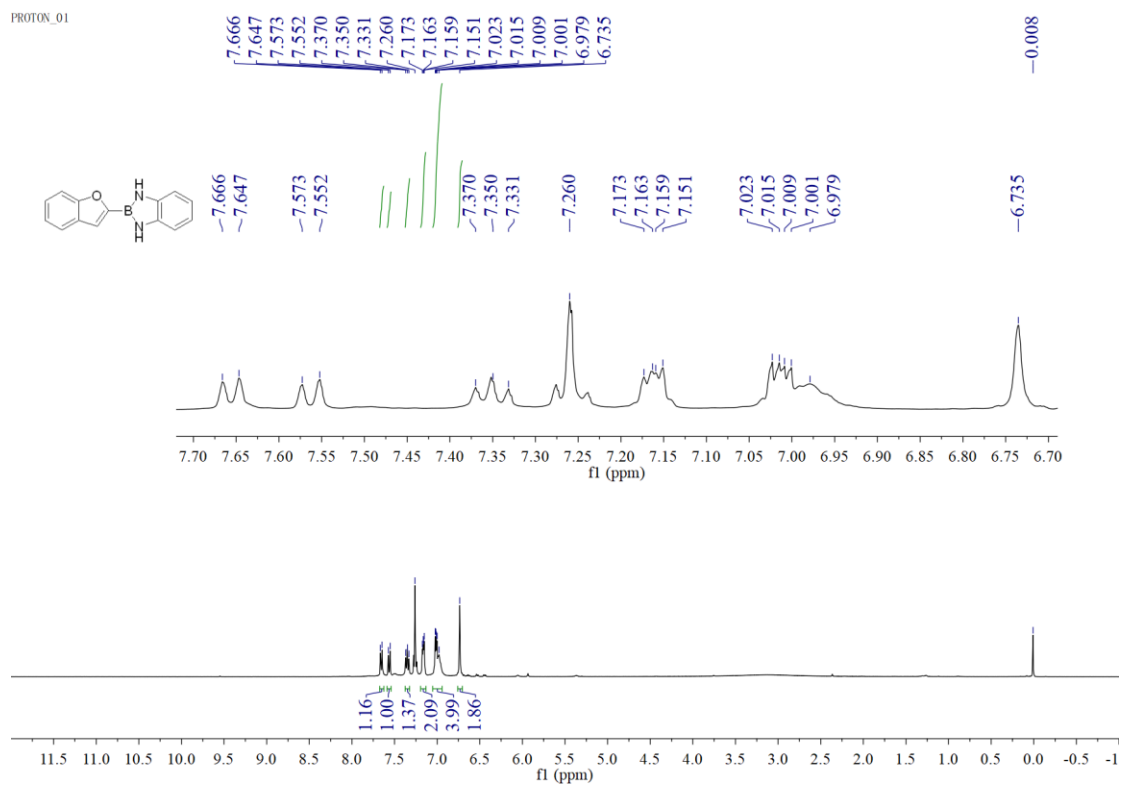

<sup>1</sup>H NMR spectrum of **2I** in CDCl<sub>3</sub>

CARBON\_01

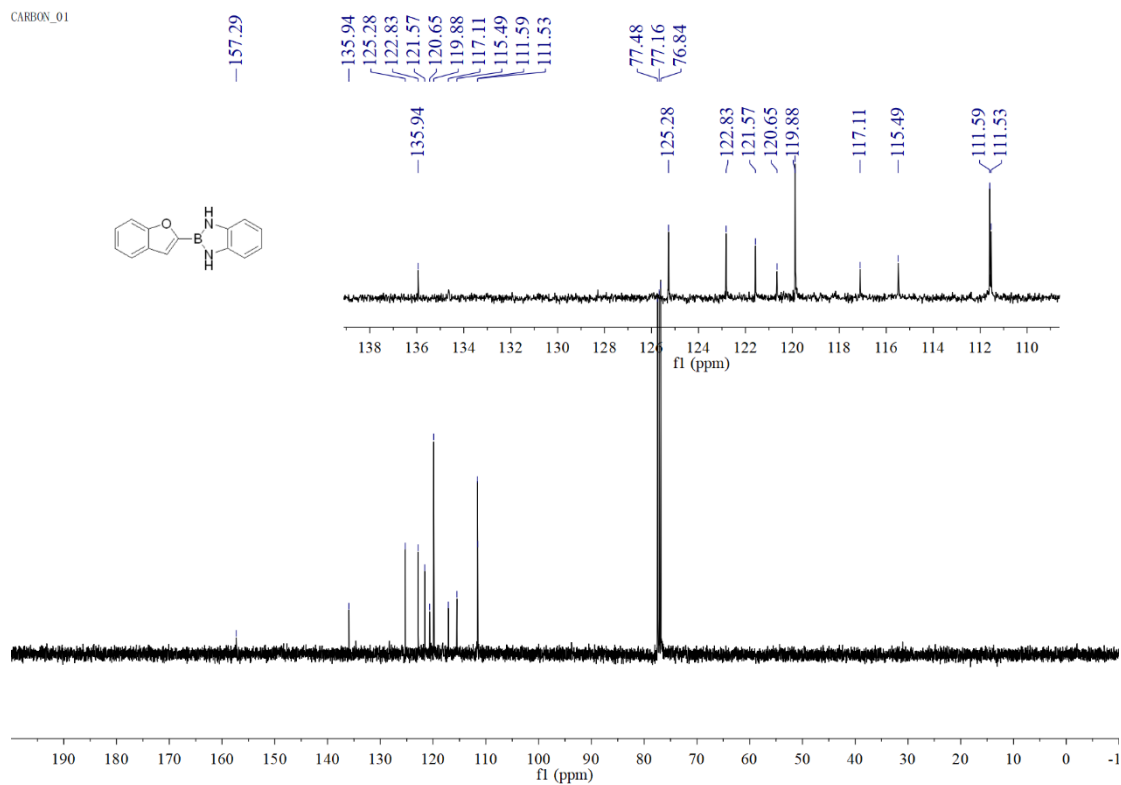

<sup>13</sup>C NMR spectrum of **2I** in CDCl<sub>3</sub>

PROTON\_01

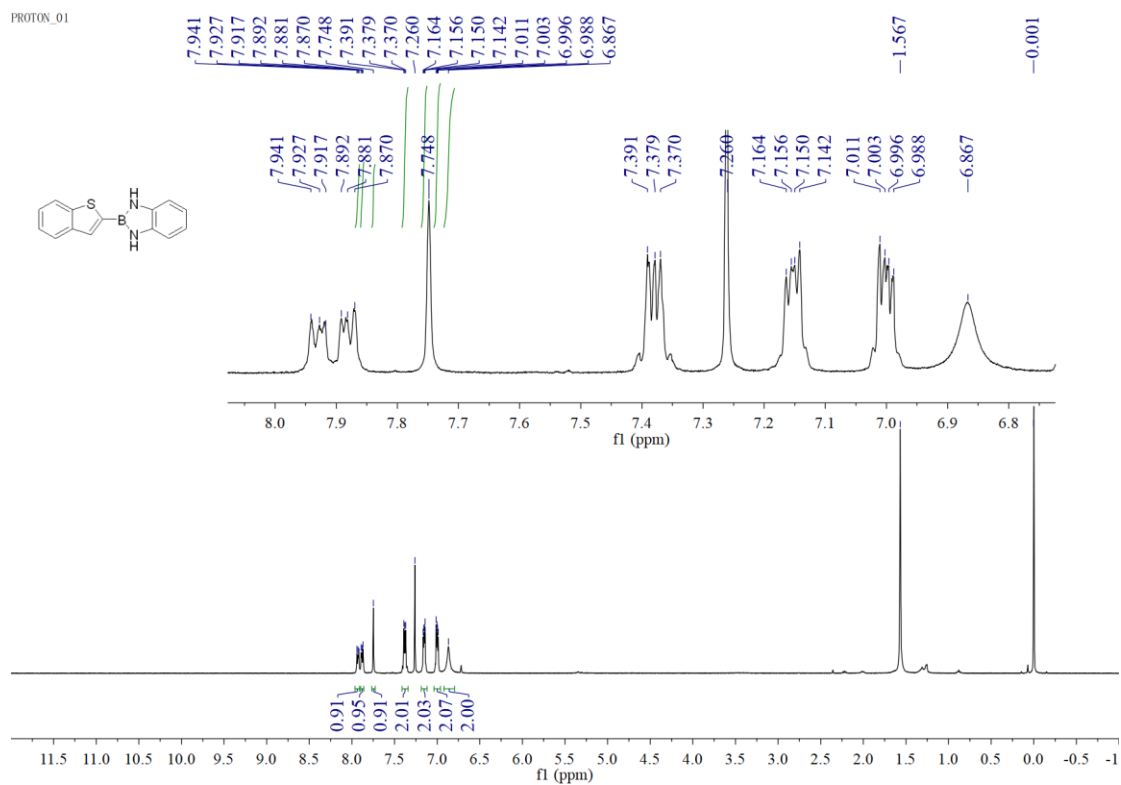

<sup>1</sup>H NMR spectrum of **2m** in CDCl<sub>3</sub>

CARBON\_01

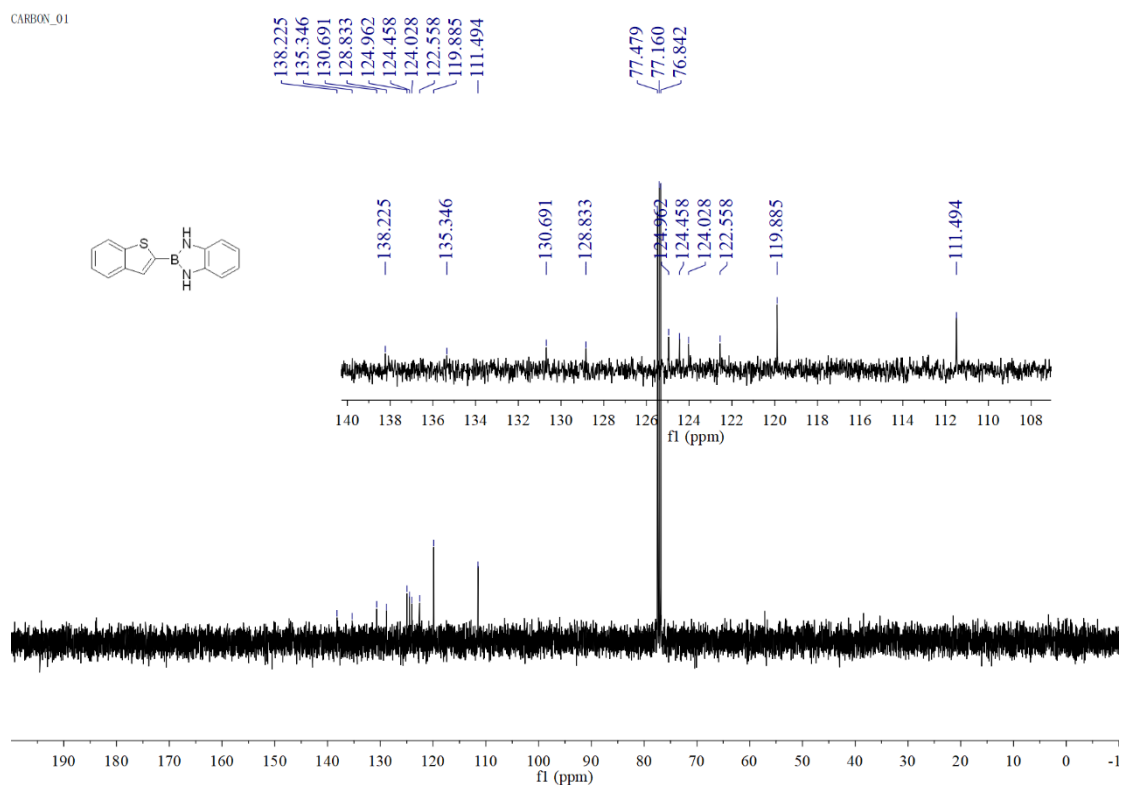

<sup>13</sup>C NMR spectrum of **2m** in CDCl<sub>3</sub>

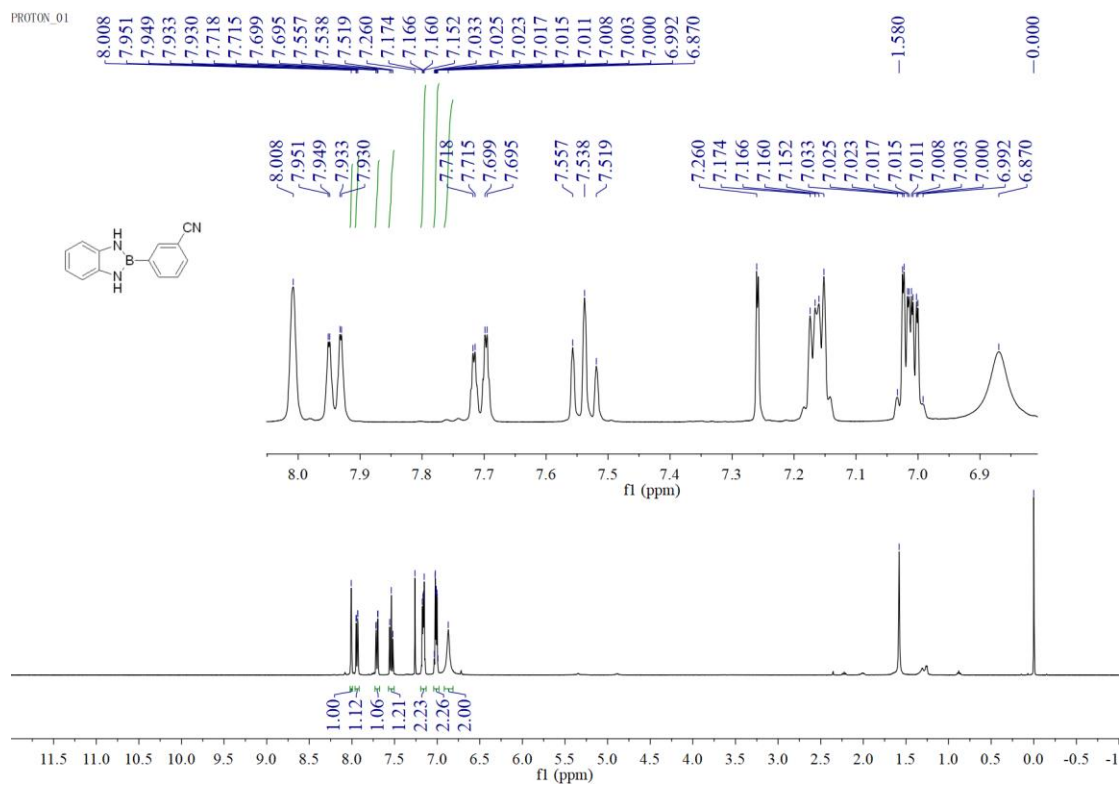

<sup>1</sup>H NMR spectrum of **3b** in CDCl<sub>3</sub>

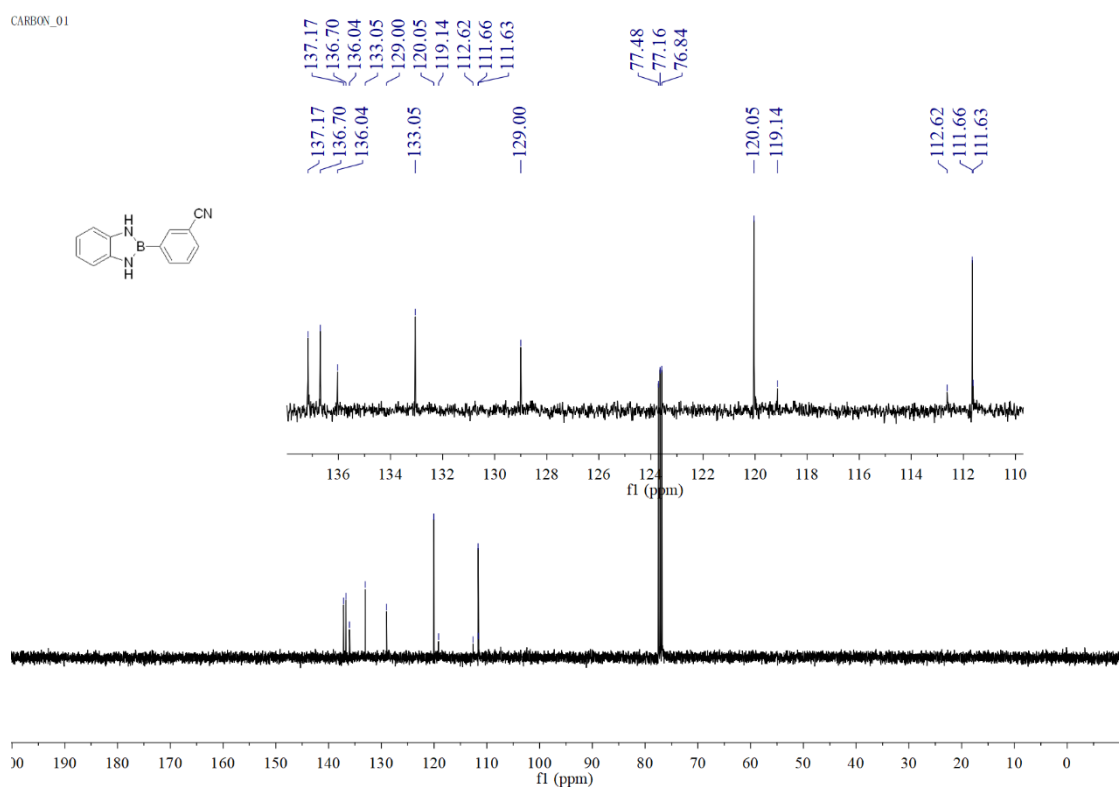

<sup>13</sup>C NMR spectrum of **3b** in CDCl<sub>3</sub>

PROTON\_01

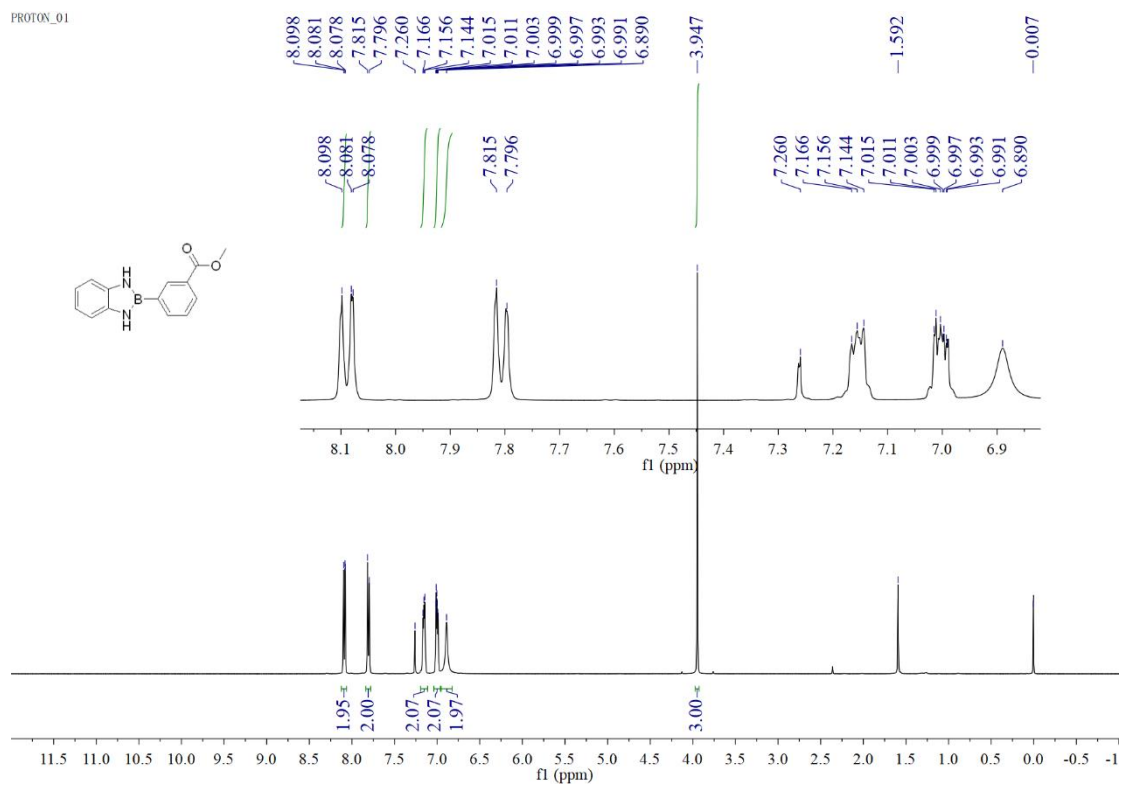

<sup>1</sup>H NMR spectrum of **3c** in CDCl<sub>3</sub>

CARBON\_01

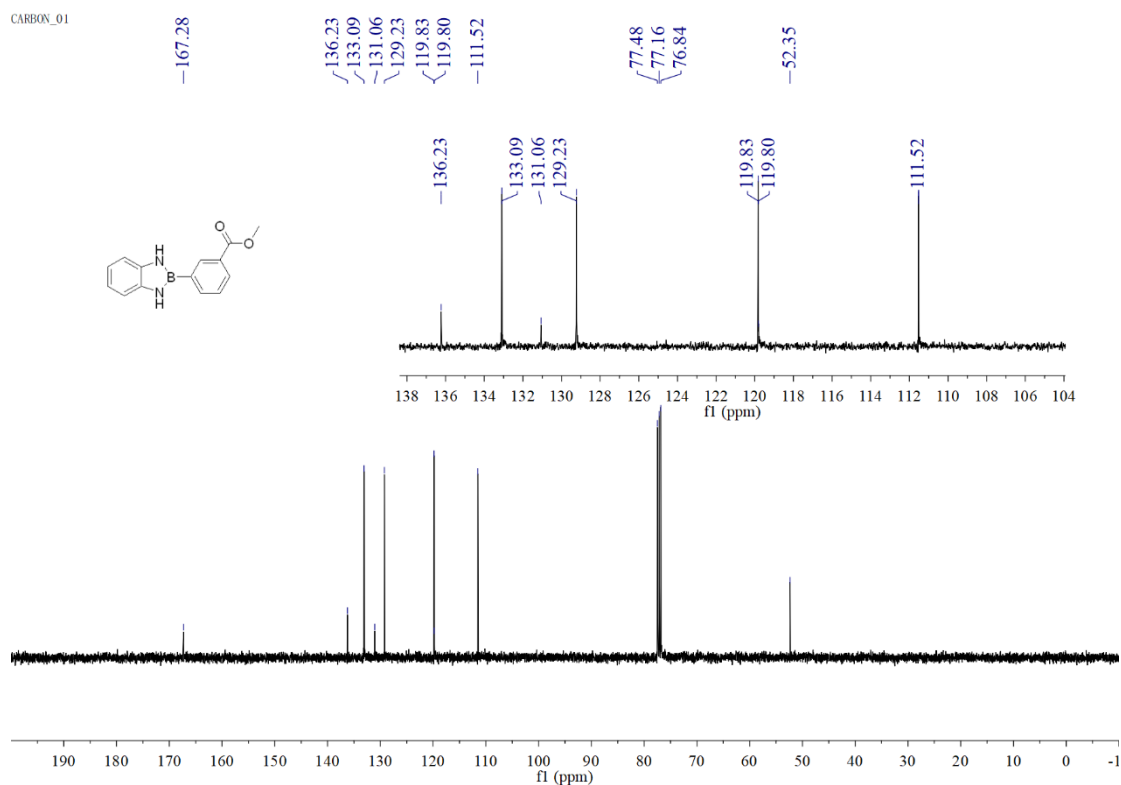

<sup>13</sup>C NMR spectrum of **3c** in CDCl<sub>3</sub>

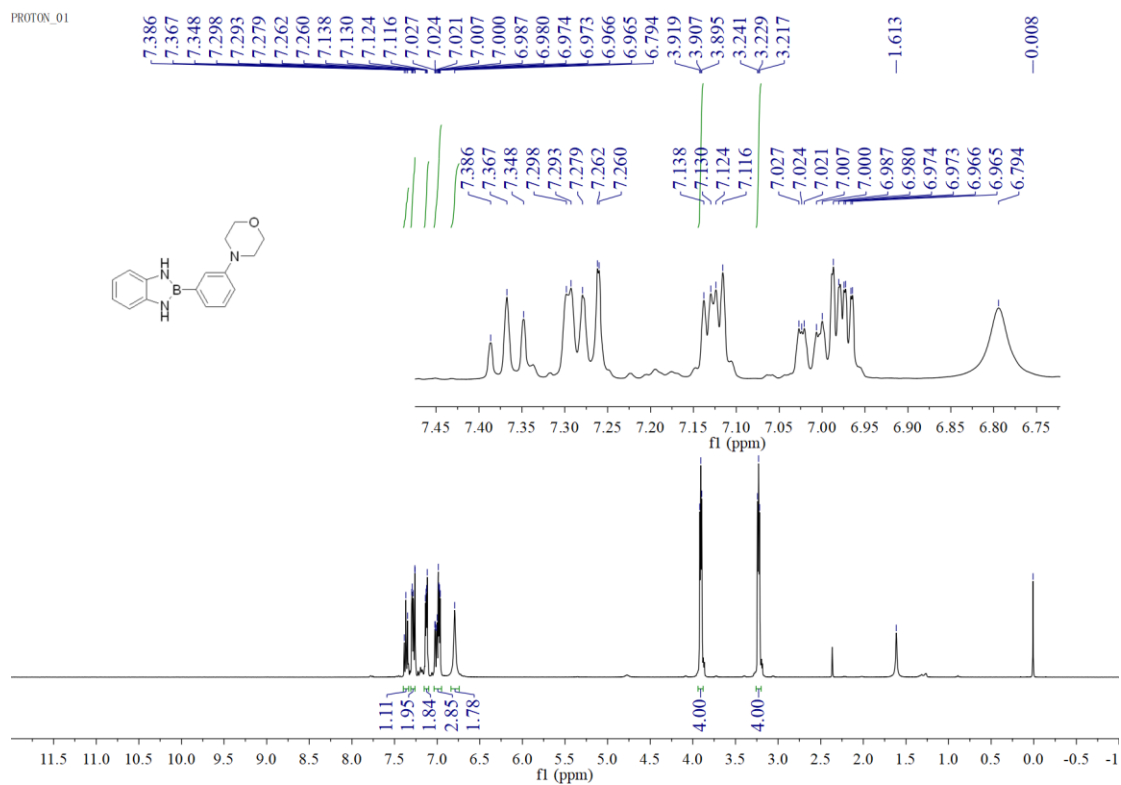

<sup>1</sup>H NMR spectrum of **3e** in CDCl<sub>3</sub>

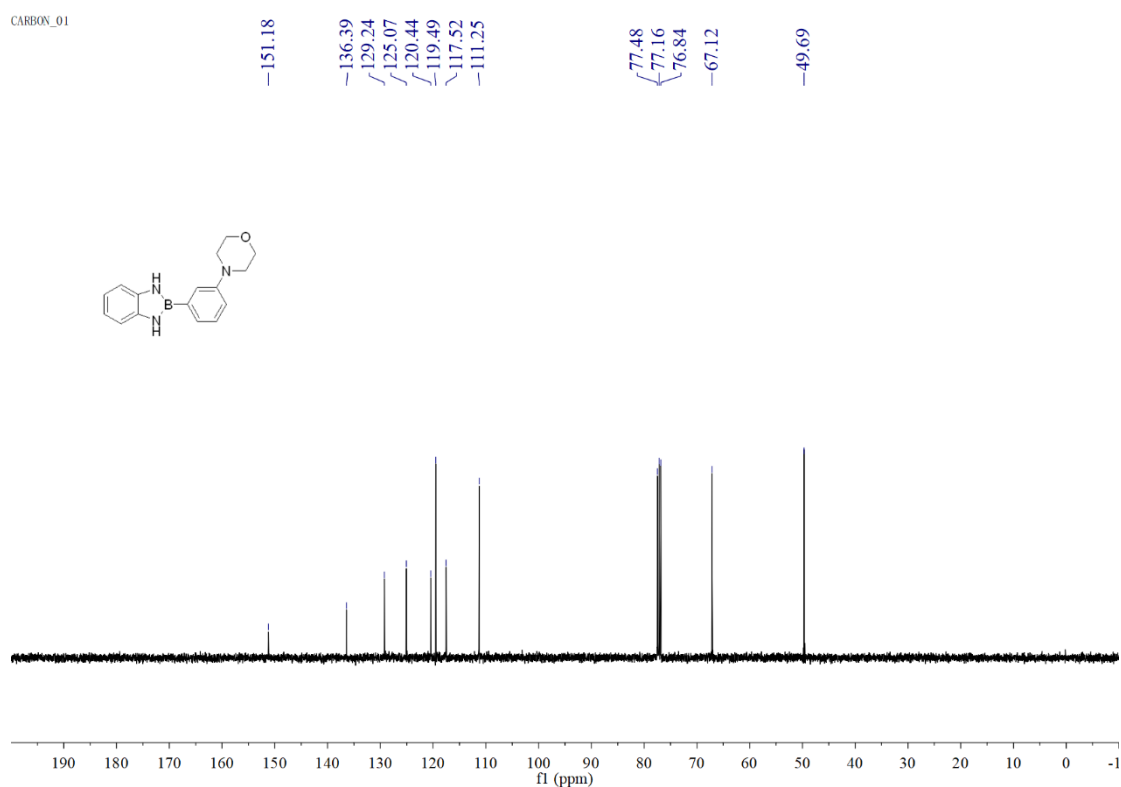

<sup>13</sup>C NMR spectrum of **3e** in CDCl<sub>3</sub>

<sup>1</sup>H NMR spectrum of **3f** in CDCl<sub>3</sub>

Chemical structure of compound **1** is shown. The structure is a phenanthrene derivative with a boron atom at position 1, bonded to a hydrogen atom and a phenyl group.

The  $^{13}\text{C}$  NMR spectrum (top trace) shows peaks at the following chemical shifts (ppm): 148.77, 148.38, 147.69, 142.52, 141.45, 141.22, 137.12, 133.32, 128.34, 128.18, 128.03, 127.92, 123.62, 123.43, 120.71, 120.61, 120.16, 118.19, 117.28, 114.52, 110.65, 65.51, 40.15, 39.94, 39.73, 39.52, 39.31, 39.10, 38.89, 148.77, 148.38, 147.69, 142.52, 141.45, 141.22, 137.12, 133.32, 128.34, 128.18, 128.03, 127.92, 123.62, 123.43, 120.71, 120.61, 120.16, 118.19, 117.28, 114.52, 110.65.

The simulated spectrum (bottom trace) shows peaks at the following chemical shifts (ppm): 148.77, 148.38, 147.69, 142.52, 141.45, 141.22, 137.12, 133.32, 128.34, 128.18, 128.03, 127.92, 123.62, 123.43, 120.71, 120.61, 120.16, 118.19, 117.28, 114.52, 110.65.

 $^{13}\text{C}$  NMR spectrum of **3f** in  $\text{CDCl}_3$

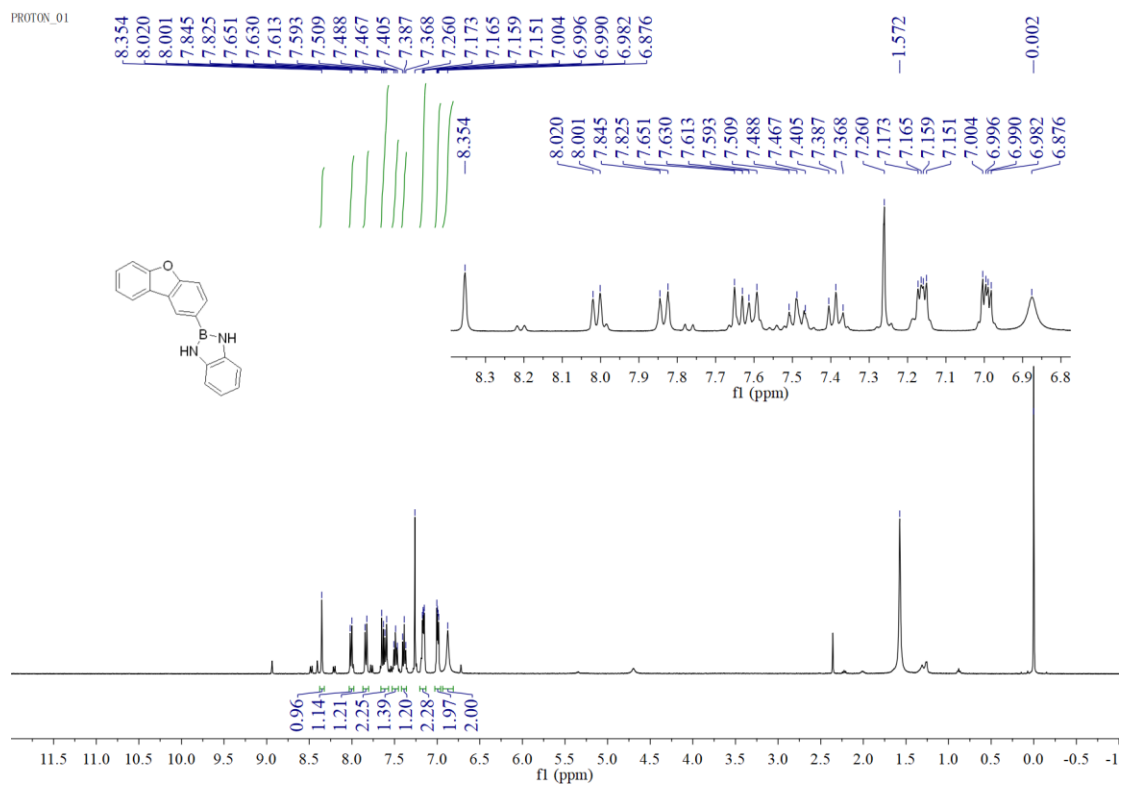

<sup>1</sup>H NMR spectrum of **3h** in CDCl<sub>3</sub>

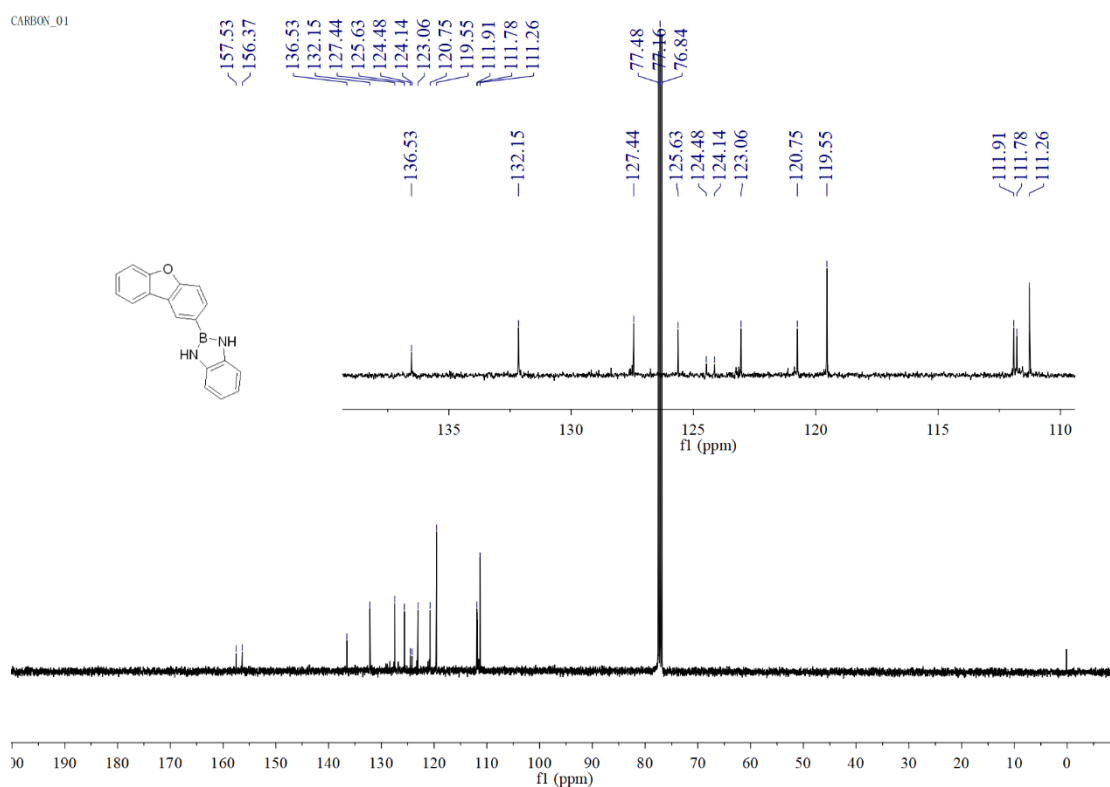

<sup>13</sup>C NMR spectrum of **3h** in CDCl<sub>3</sub>

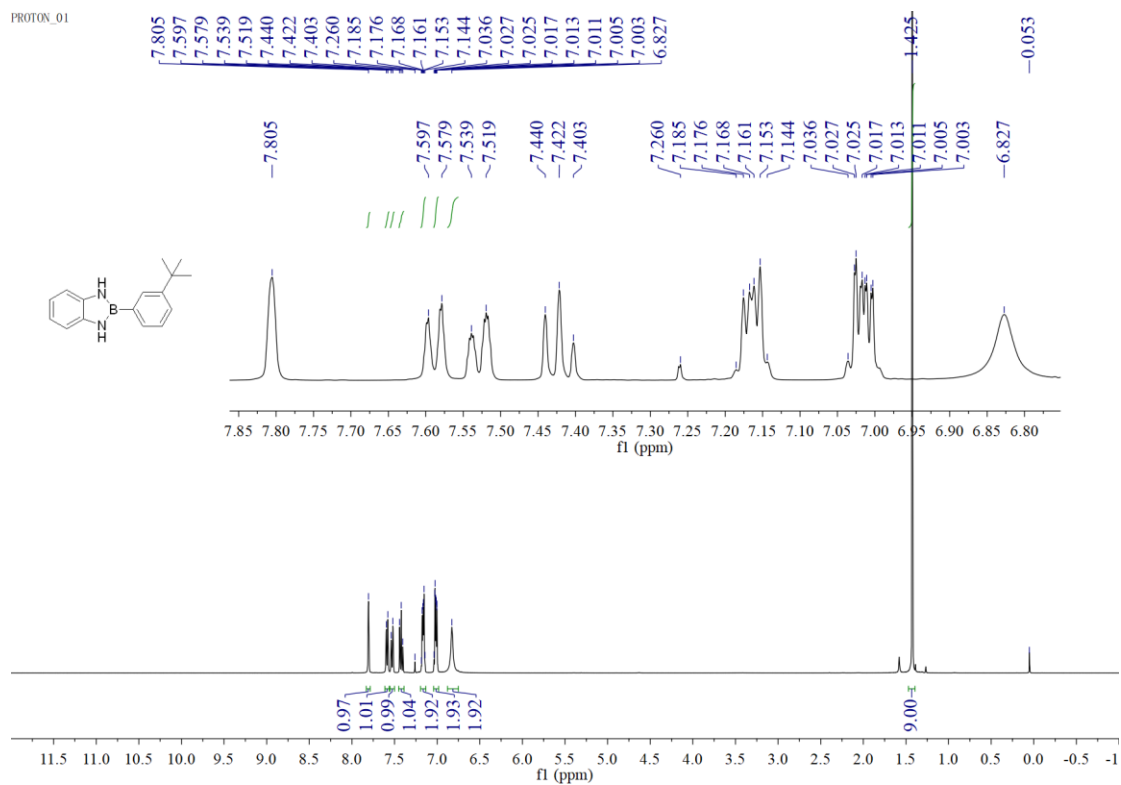

<sup>1</sup>H NMR spectrum of **31** in CDCl<sub>3</sub>

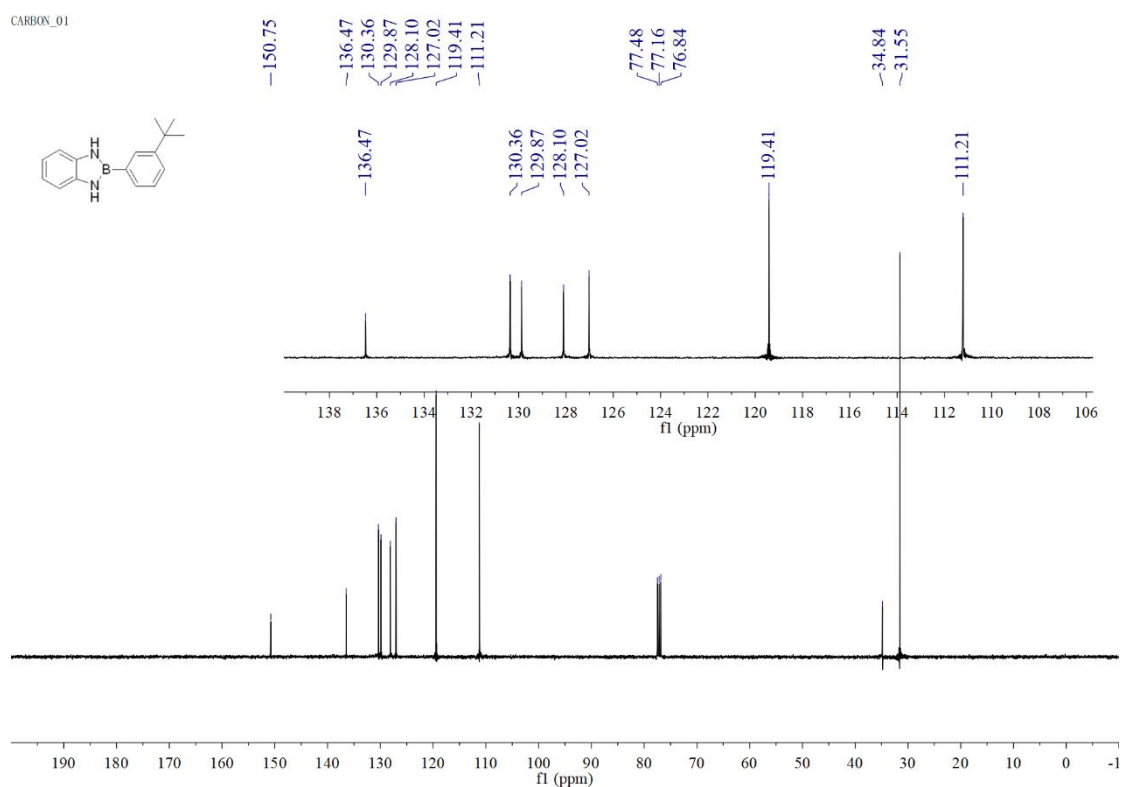

<sup>13</sup>C NMR spectrum of **31** in CDCl<sub>3</sub>



PROTON\_01

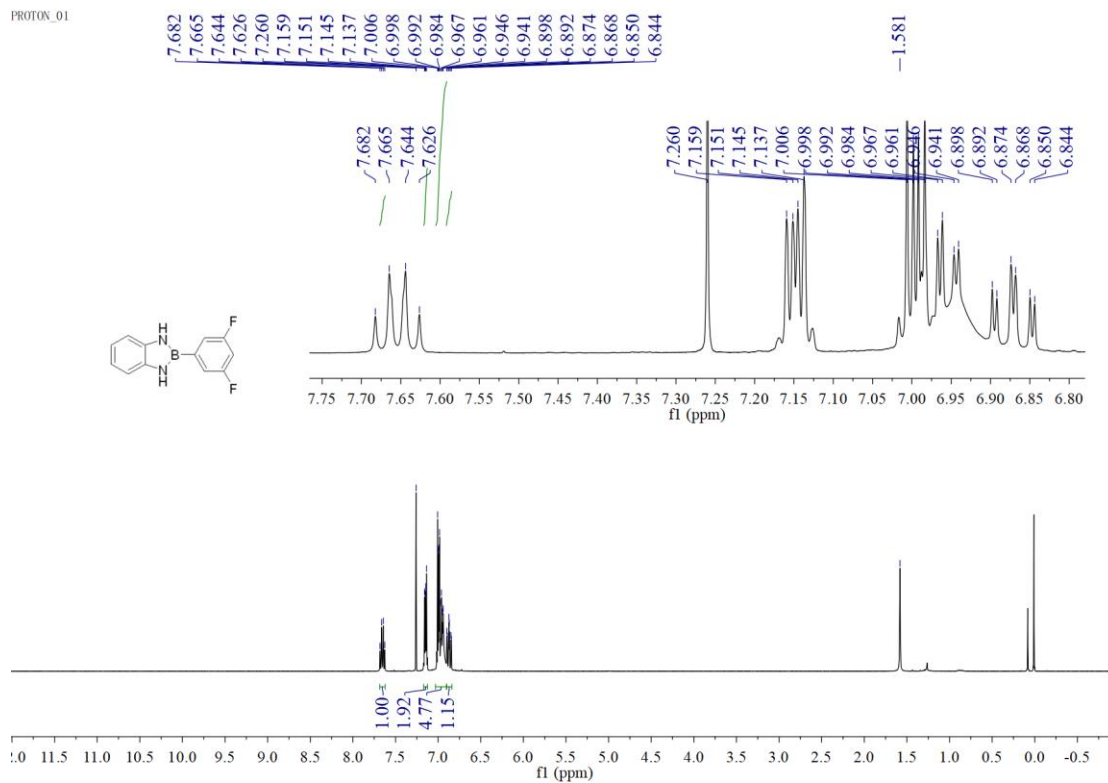

<sup>1</sup>H NMR spectrum of **3m** in CDCl<sub>3</sub>

CARBON\_01

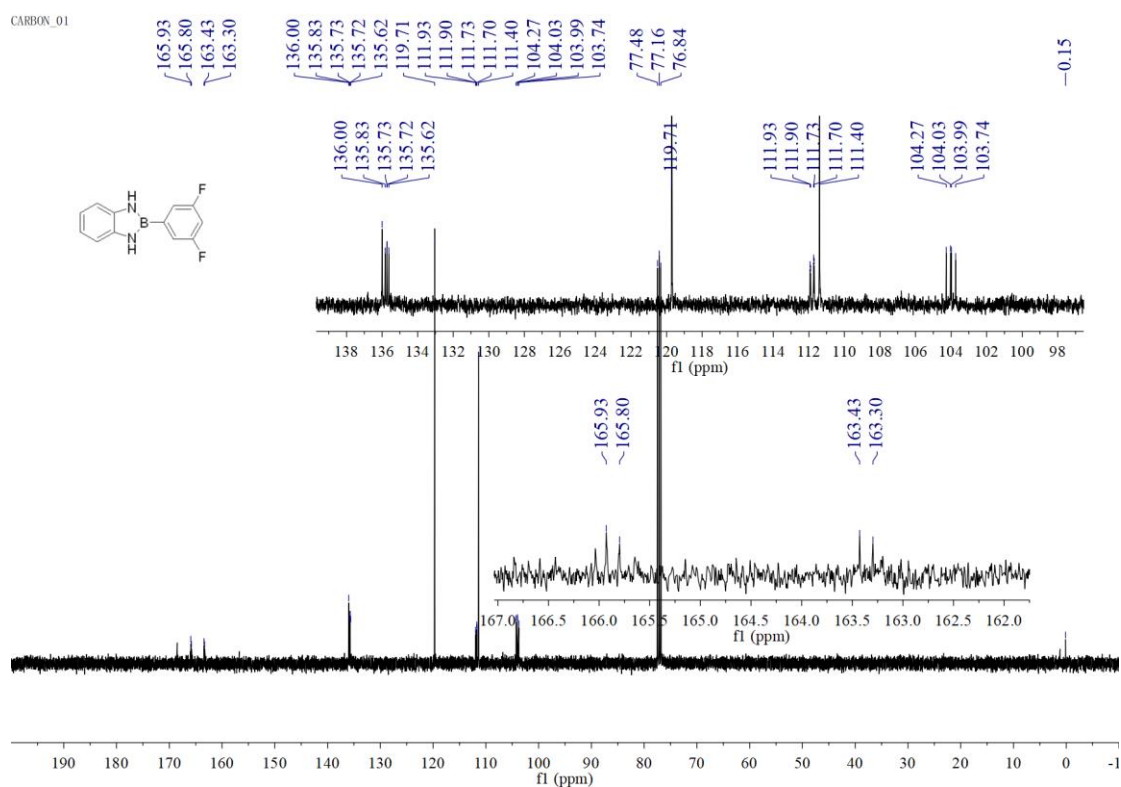

<sup>13</sup>C NMR spectrum of **3m** in CDCl<sub>3</sub>

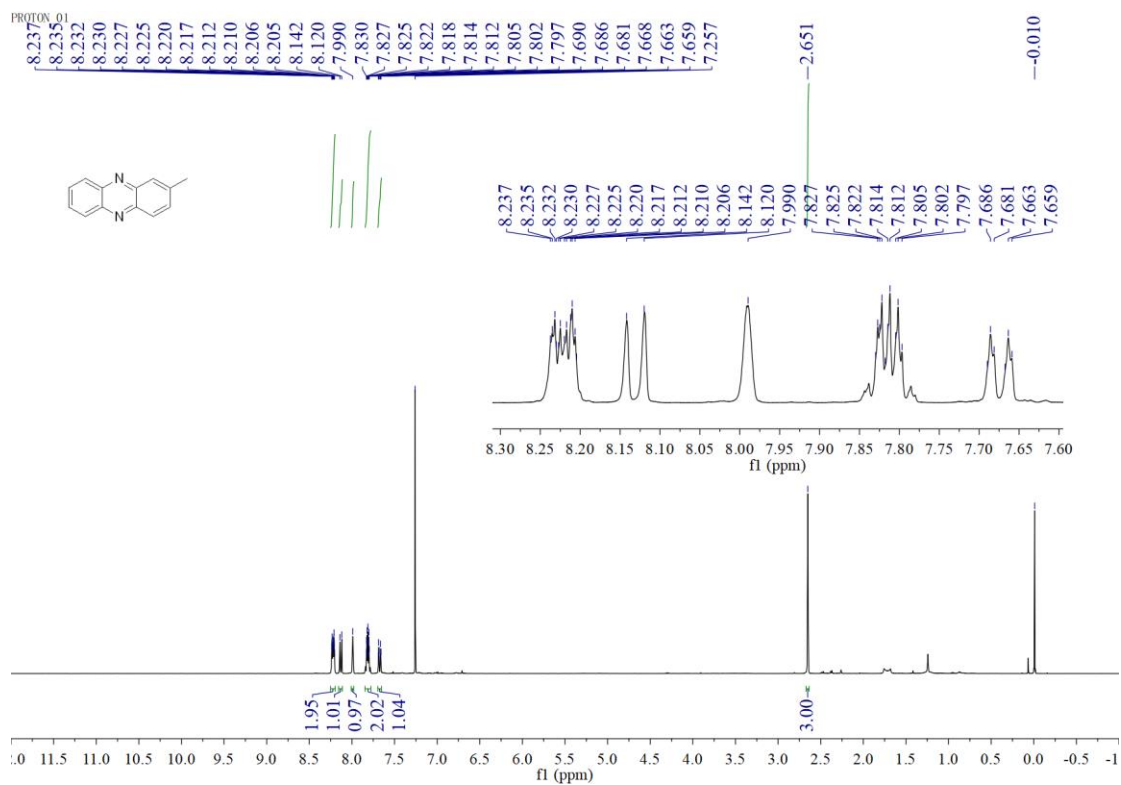

$^1\text{H}$  NMR spectrum of **4a** in  $\text{CDCl}_3$

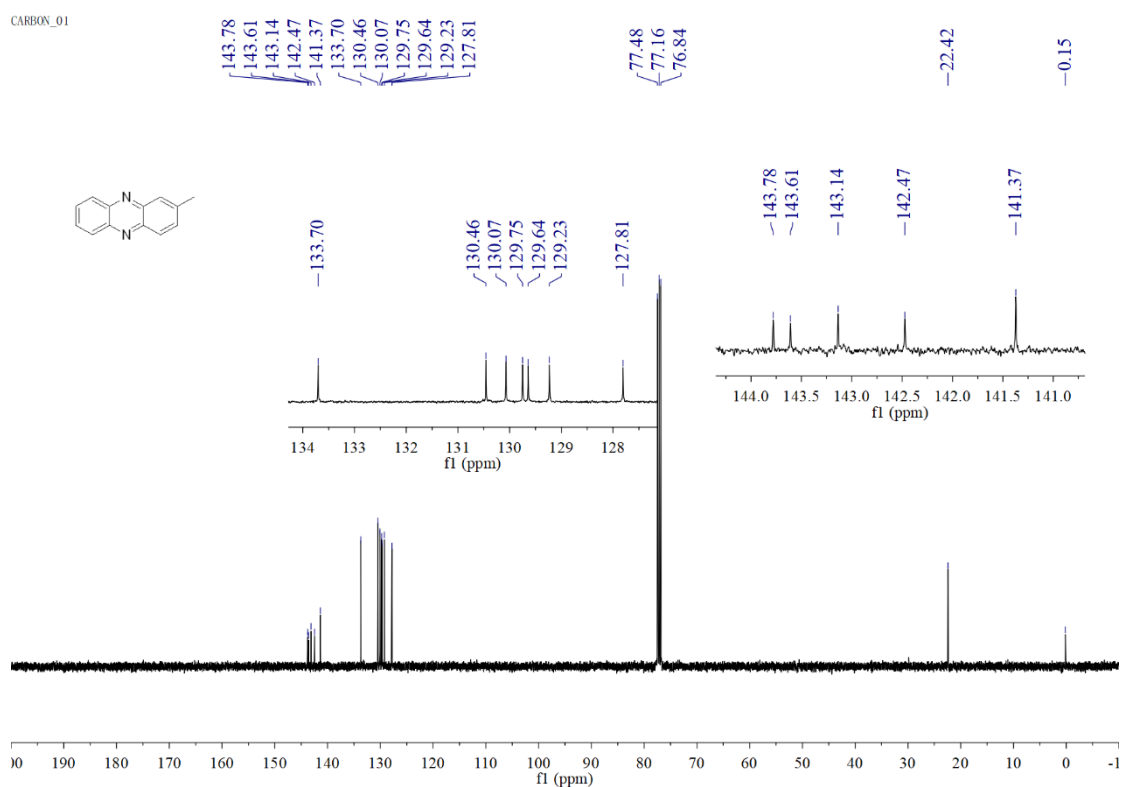

$^{13}\text{C}$  NMR spectrum of **4a** in  $\text{CDCl}_3$

PROTON\_01

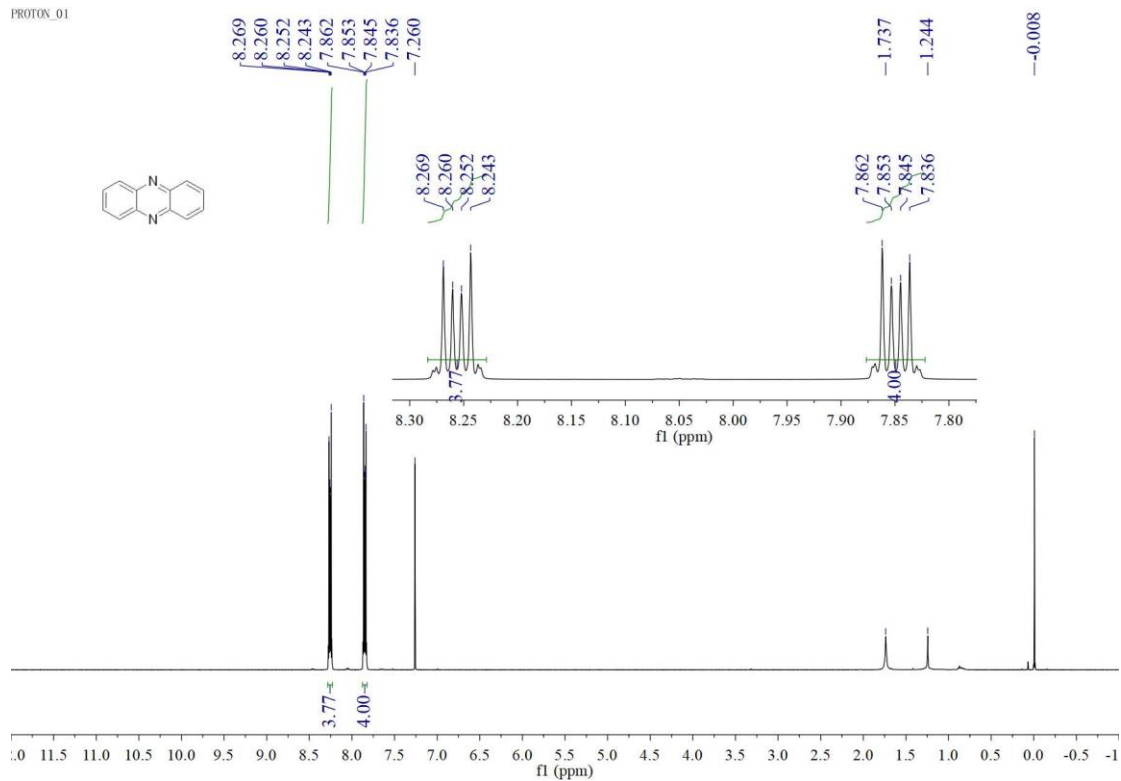

<sup>1</sup>H NMR spectrum of **4b** in CDCl<sub>3</sub>

CARBON\_01

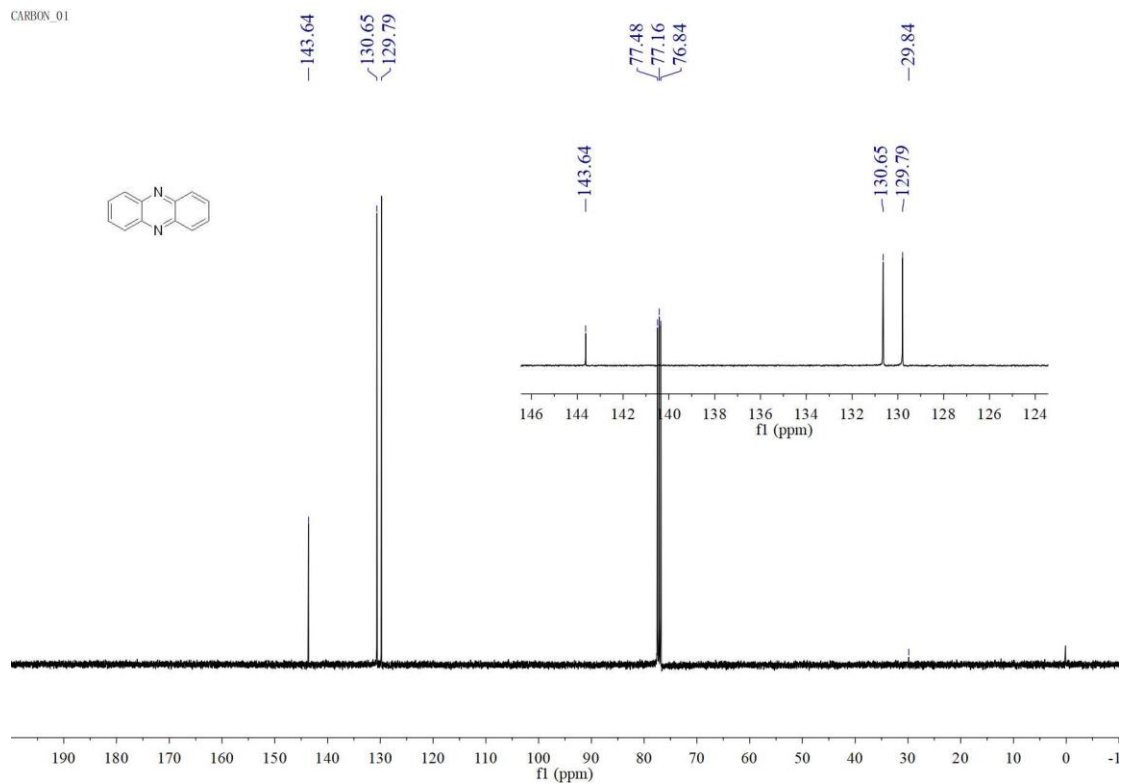

<sup>13</sup>C NMR spectrum of **4b** in CDCl<sub>3</sub>

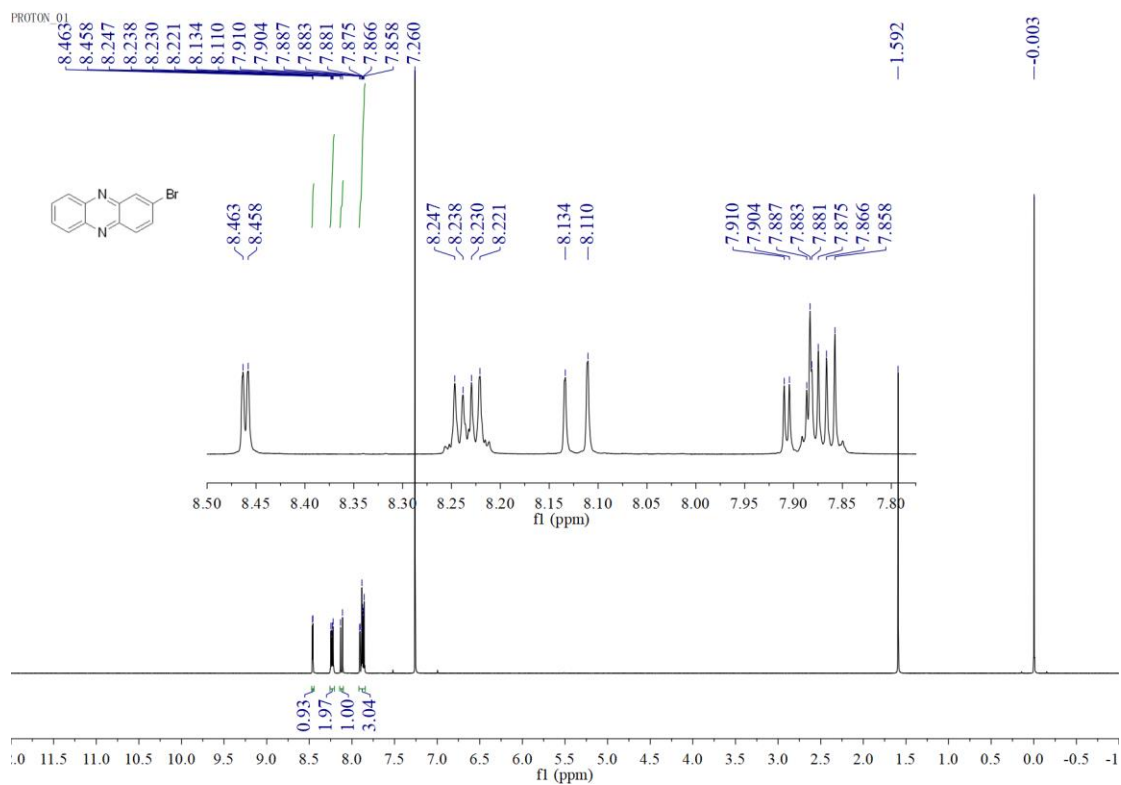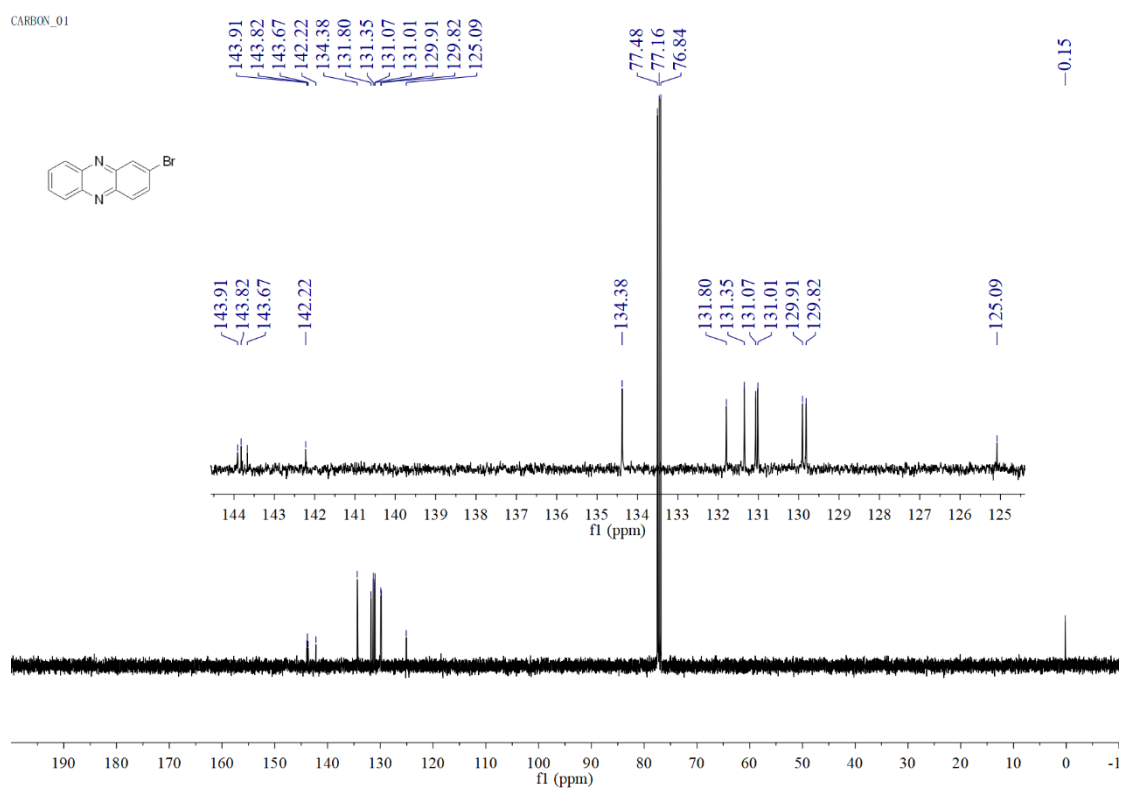

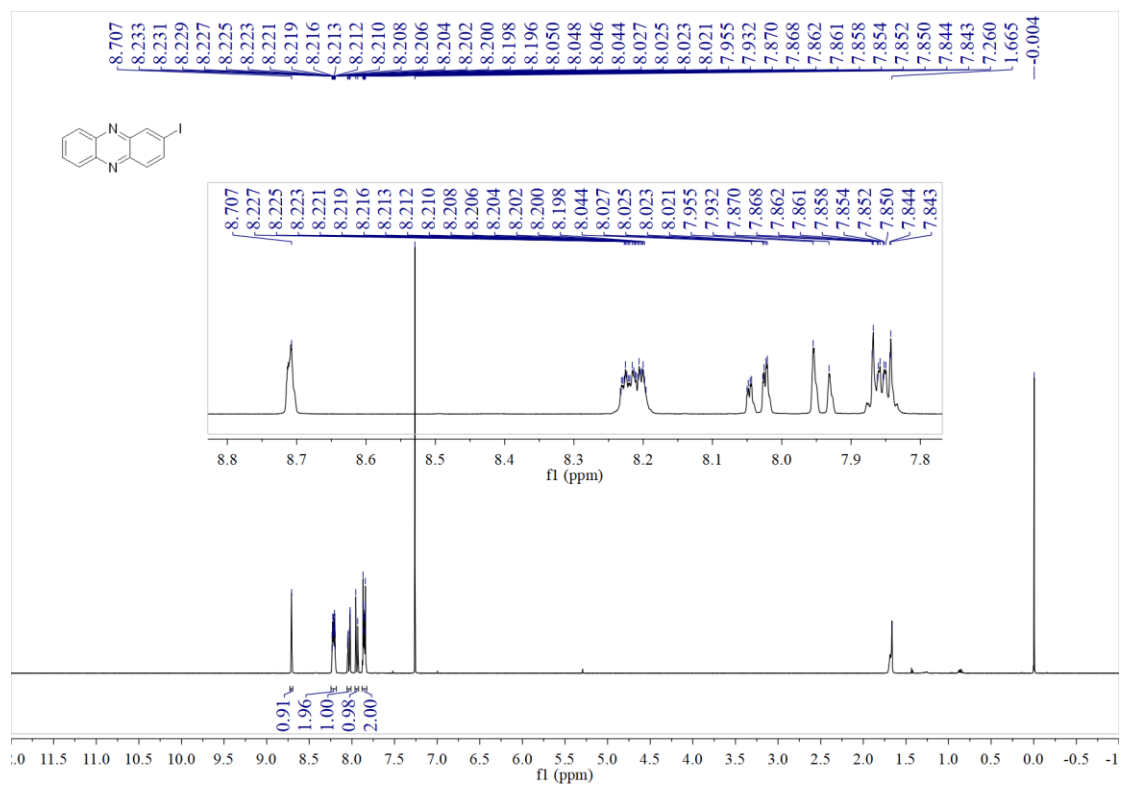

<sup>1</sup>H NMR spectrum of **4d** in CDCl<sub>3</sub>

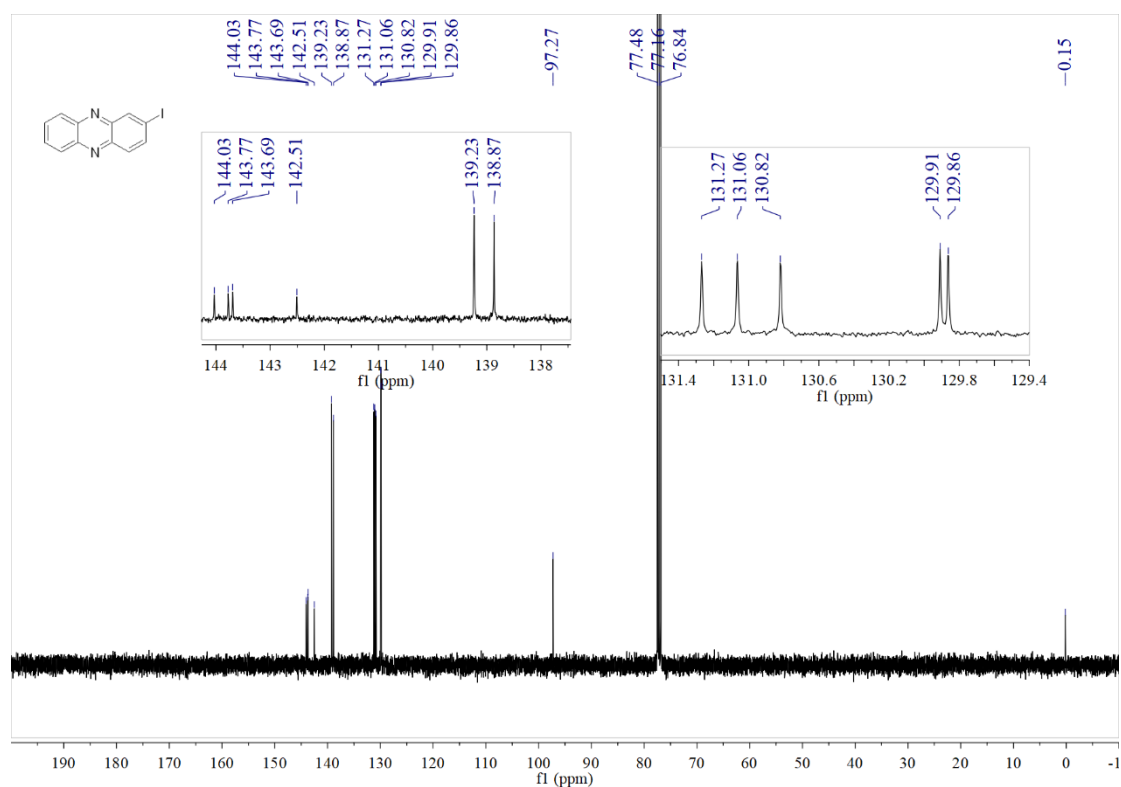

<sup>13</sup>C NMR spectrum of **4d** in CDCl<sub>3</sub>

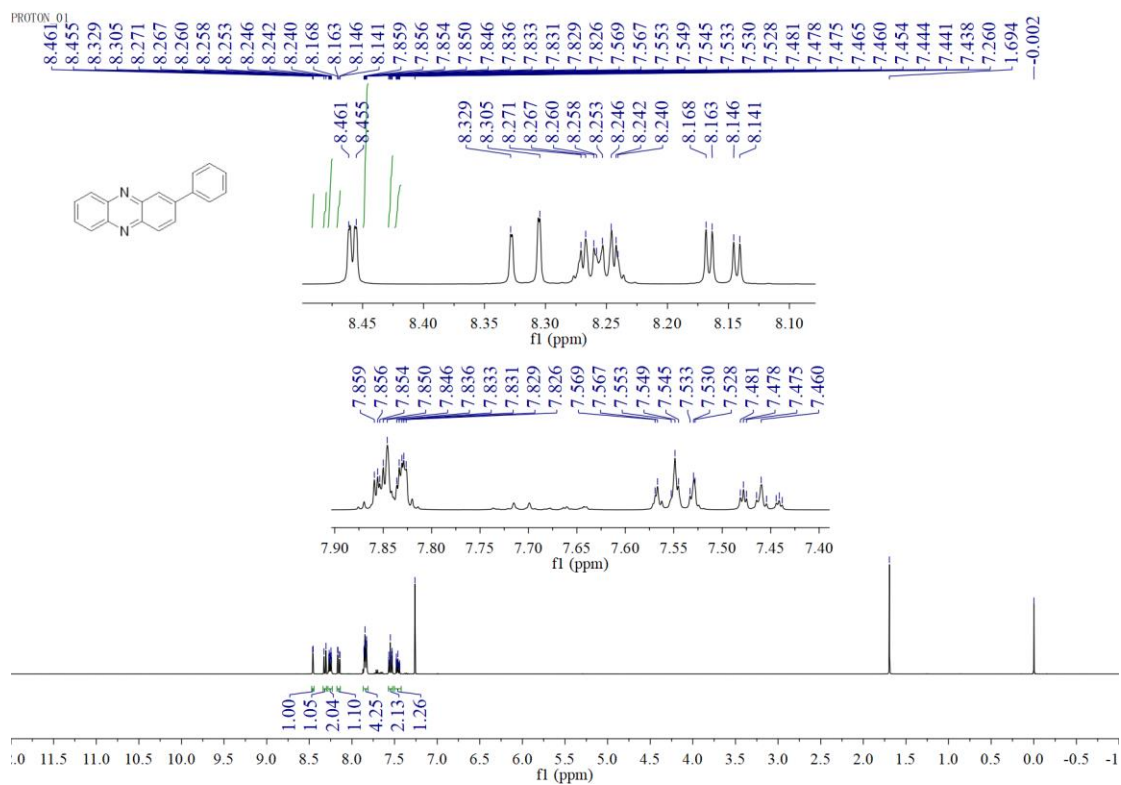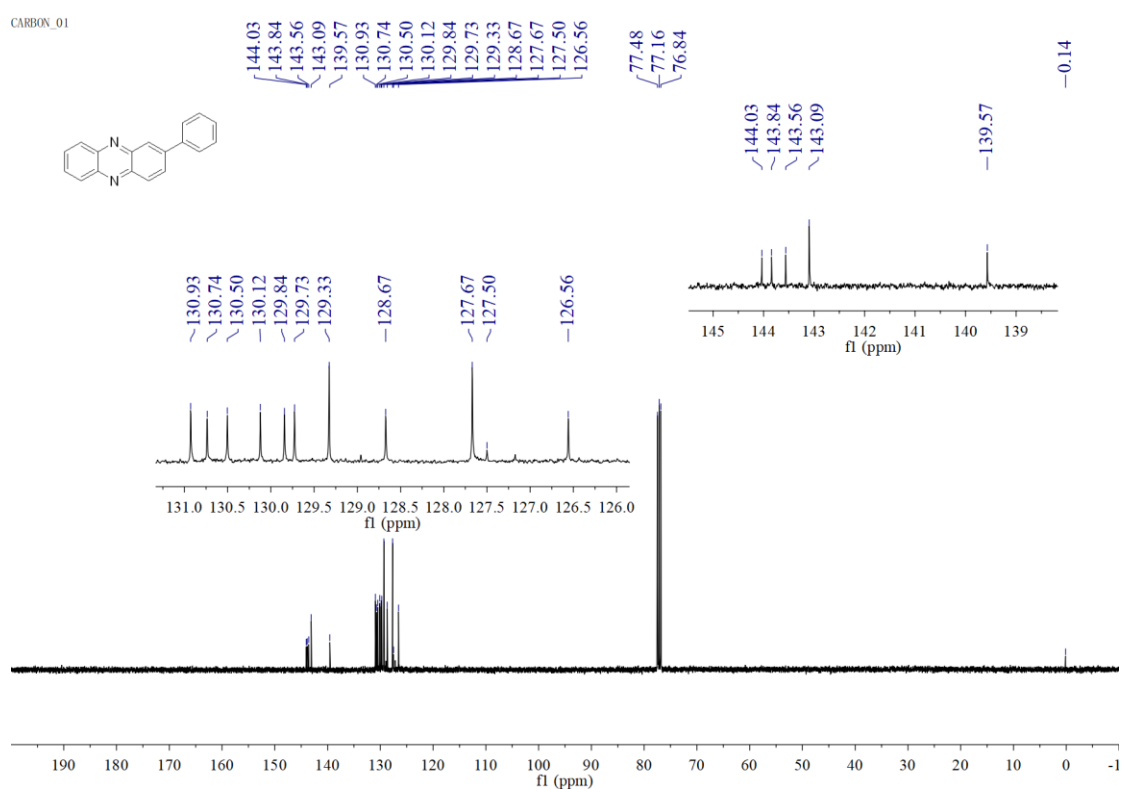

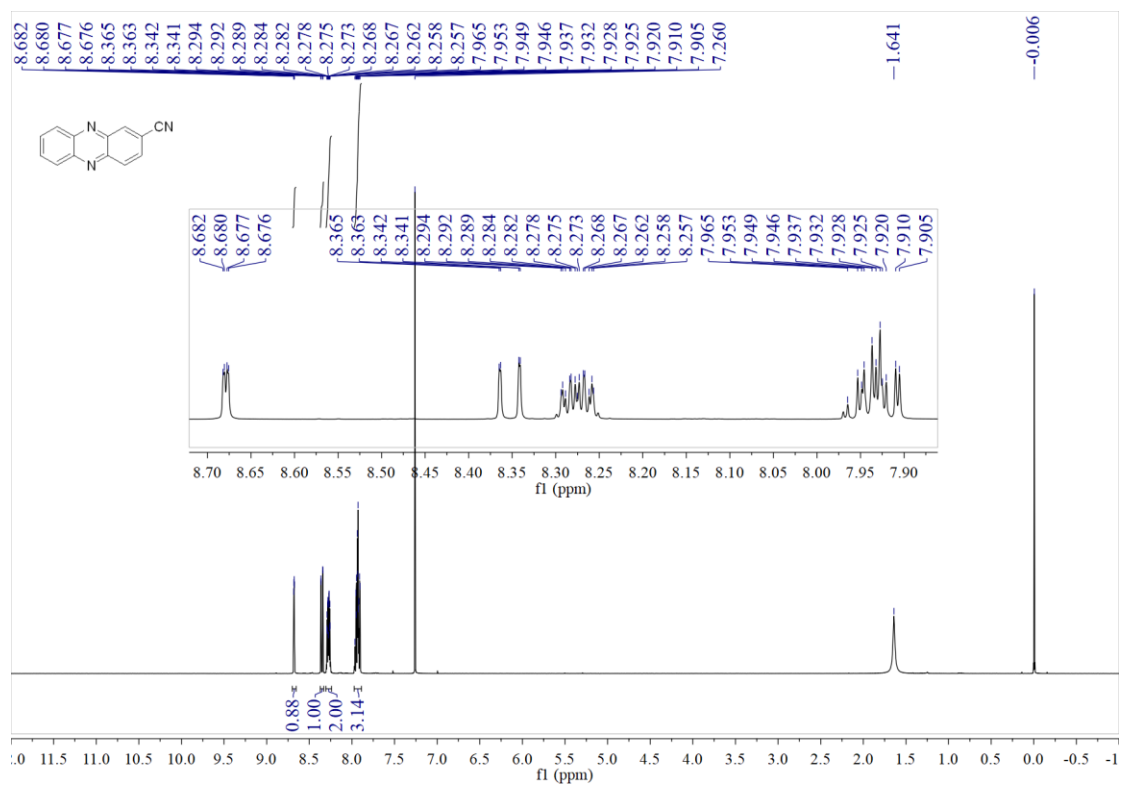

<sup>1</sup>H NMR spectrum of **4f** in CDCl<sub>3</sub>

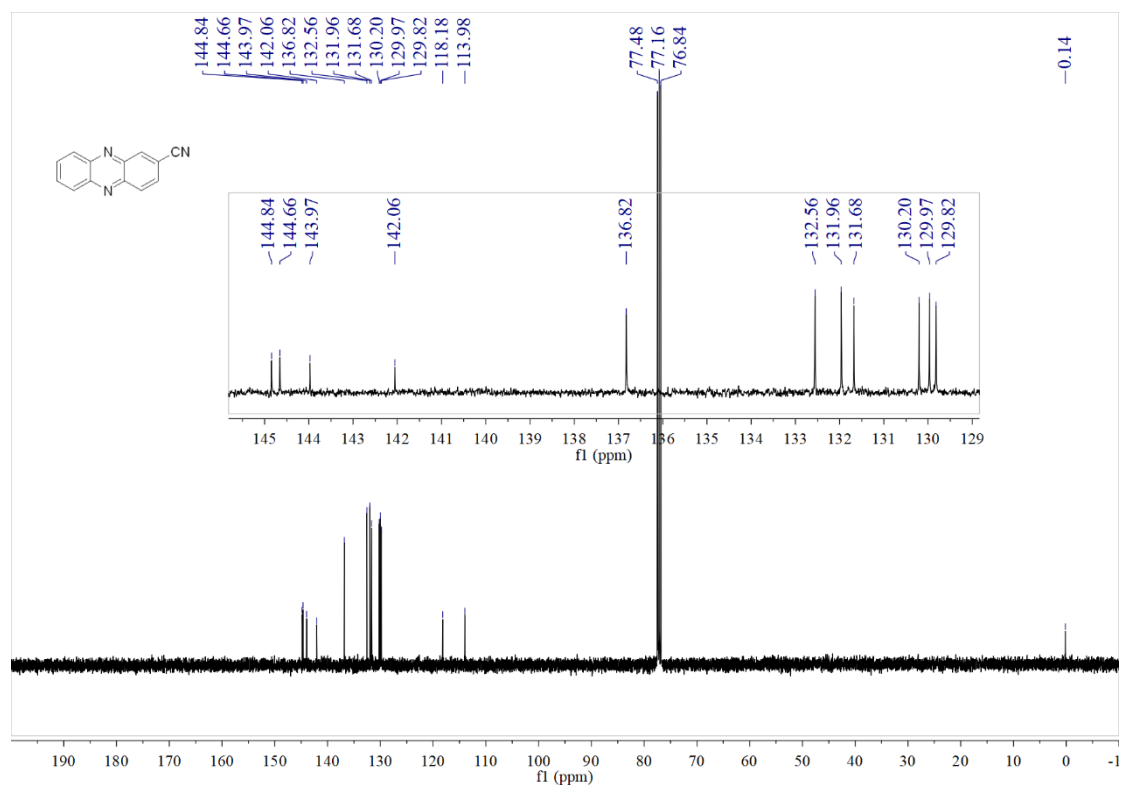

<sup>13</sup>C NMR spectrum of **4f** in CDCl<sub>3</sub>

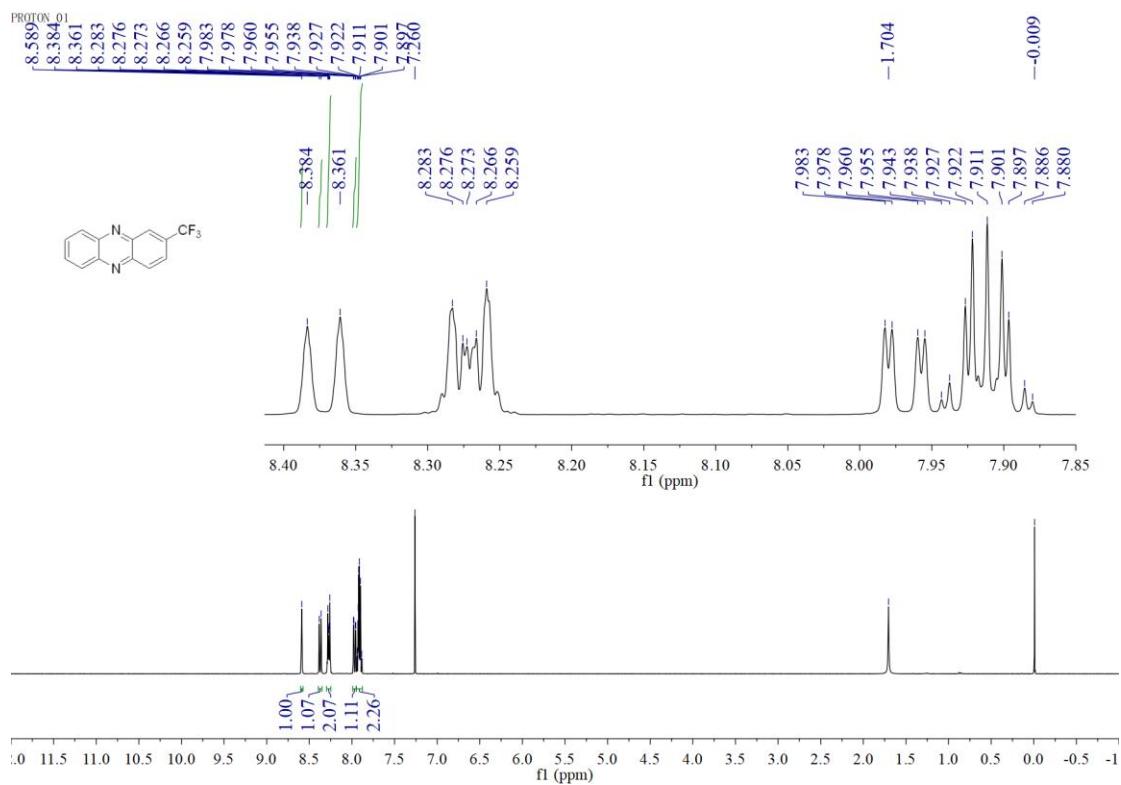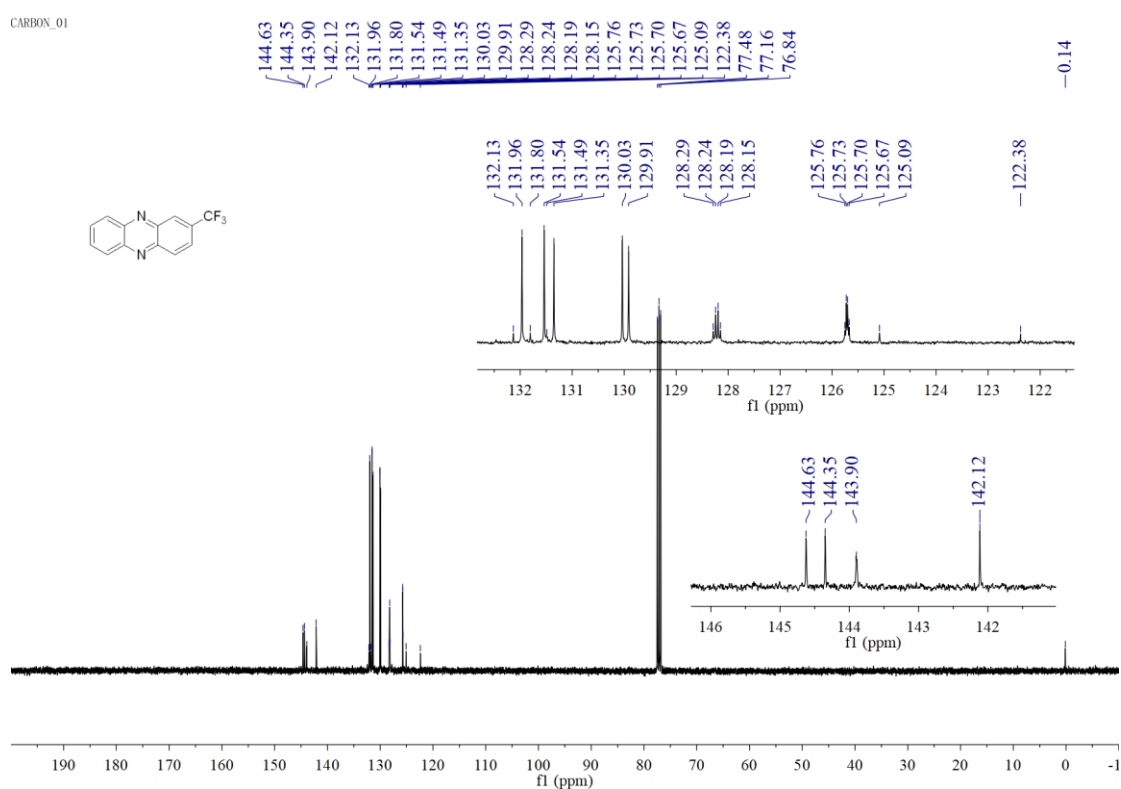



FLUORINE\_01  
STANDARD FLUORINE PARAMETERS

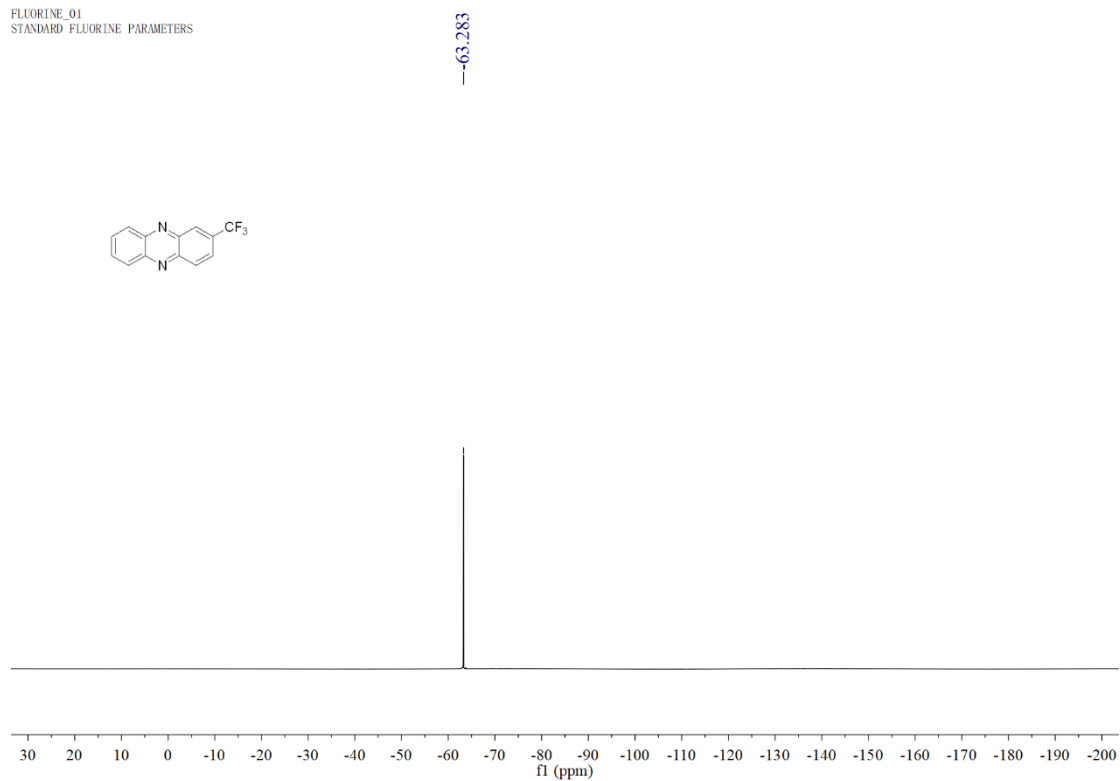

$^{19}\text{F}$  NMR spectrum of **4g** in  $\text{CDCl}_3$

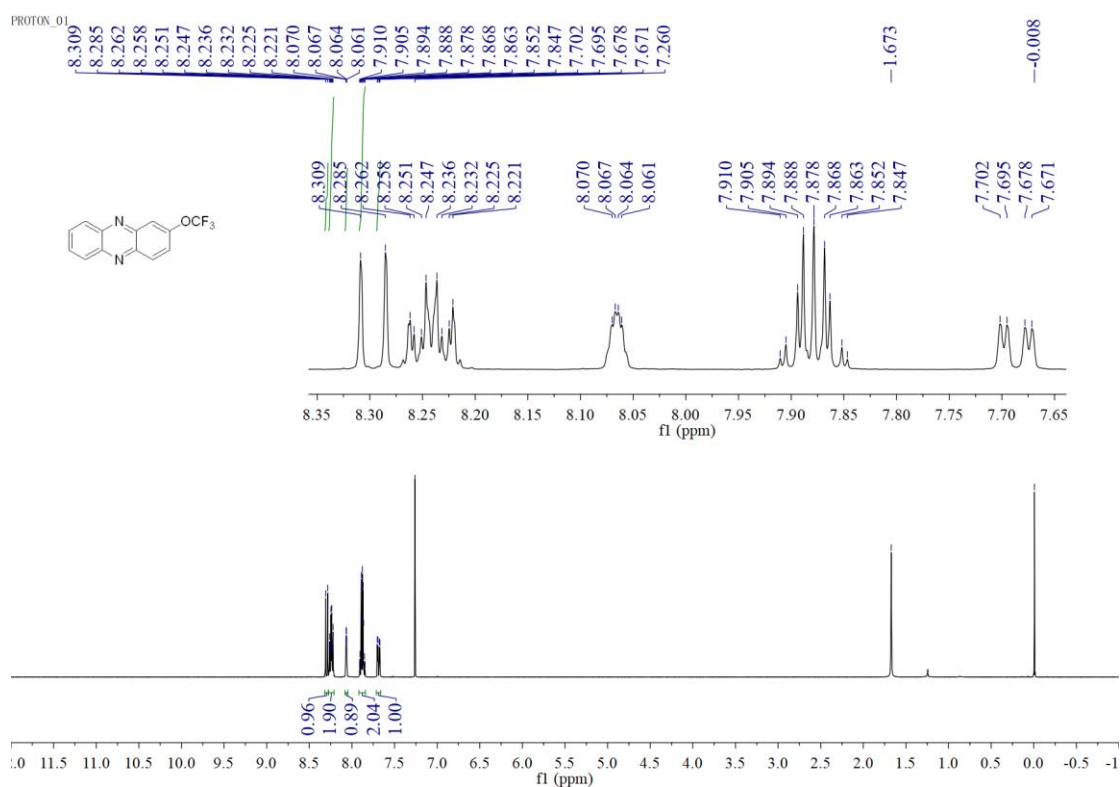

$^1\text{H}$  NMR spectrum of **4h** in  $\text{CDCl}_3$

CARBON\_01

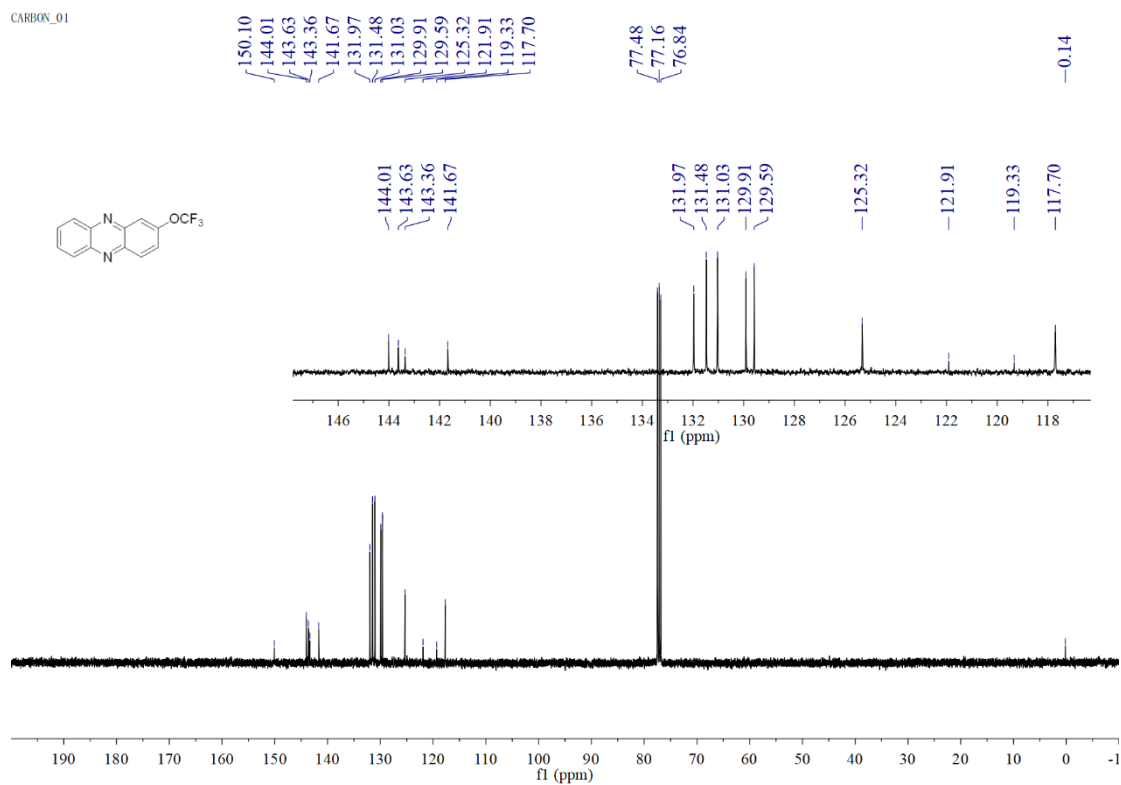

<sup>13</sup>C NMR spectrum of **4h** in CDCl<sub>3</sub>

FLUORINE\_01  
STANDARD FLUORINE PARAMETERS

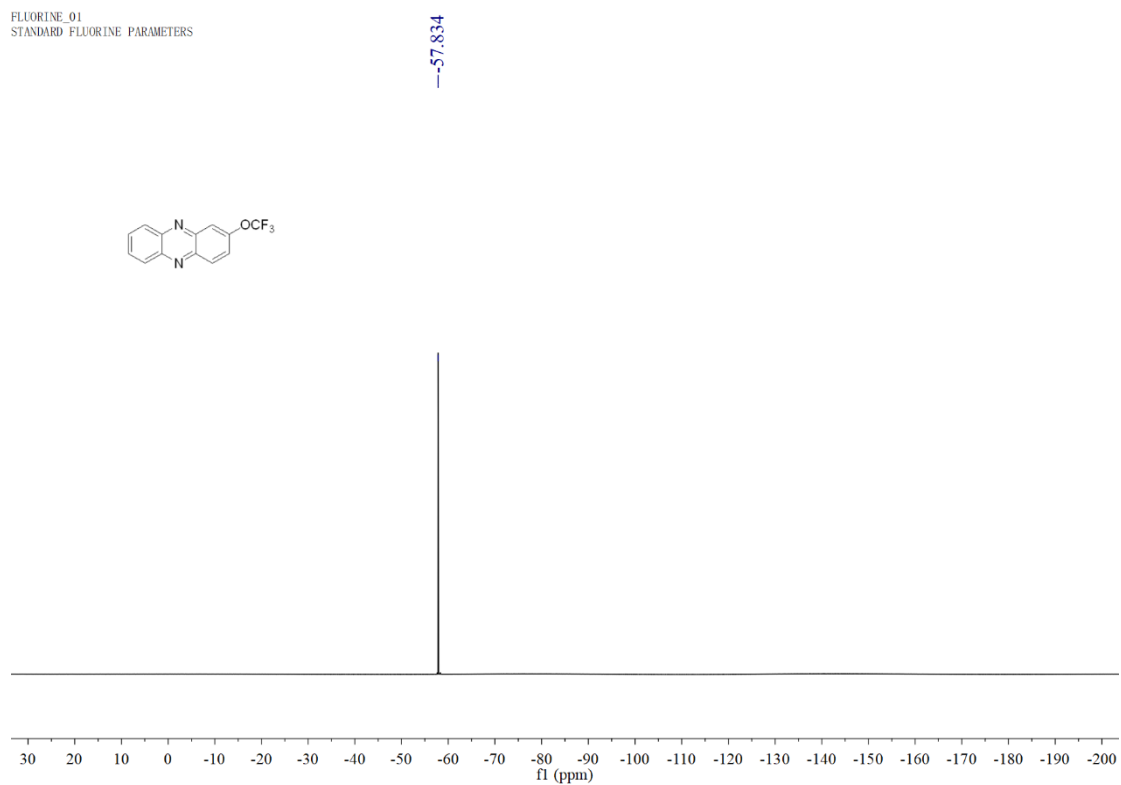

<sup>19</sup>F NMR spectrum of **4h** in CDCl<sub>3</sub>

PROTON\_01

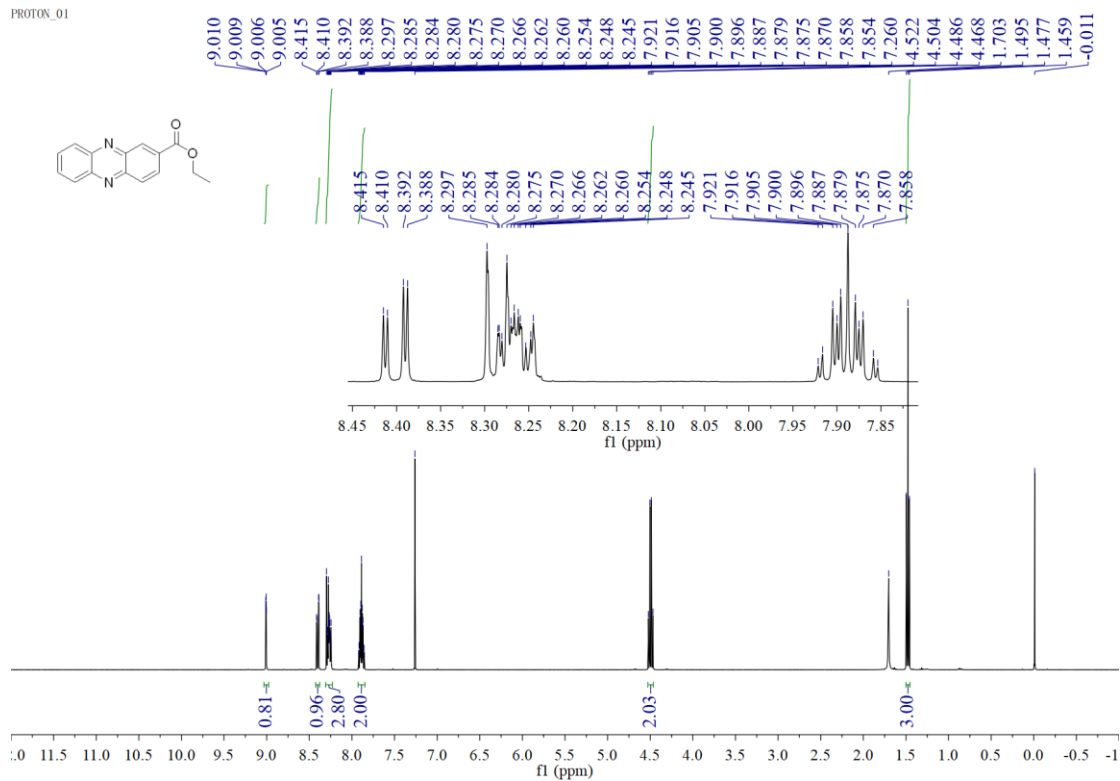

<sup>1</sup>H NMR spectrum of **4i** in CDCl<sub>3</sub>

CARBON\_01

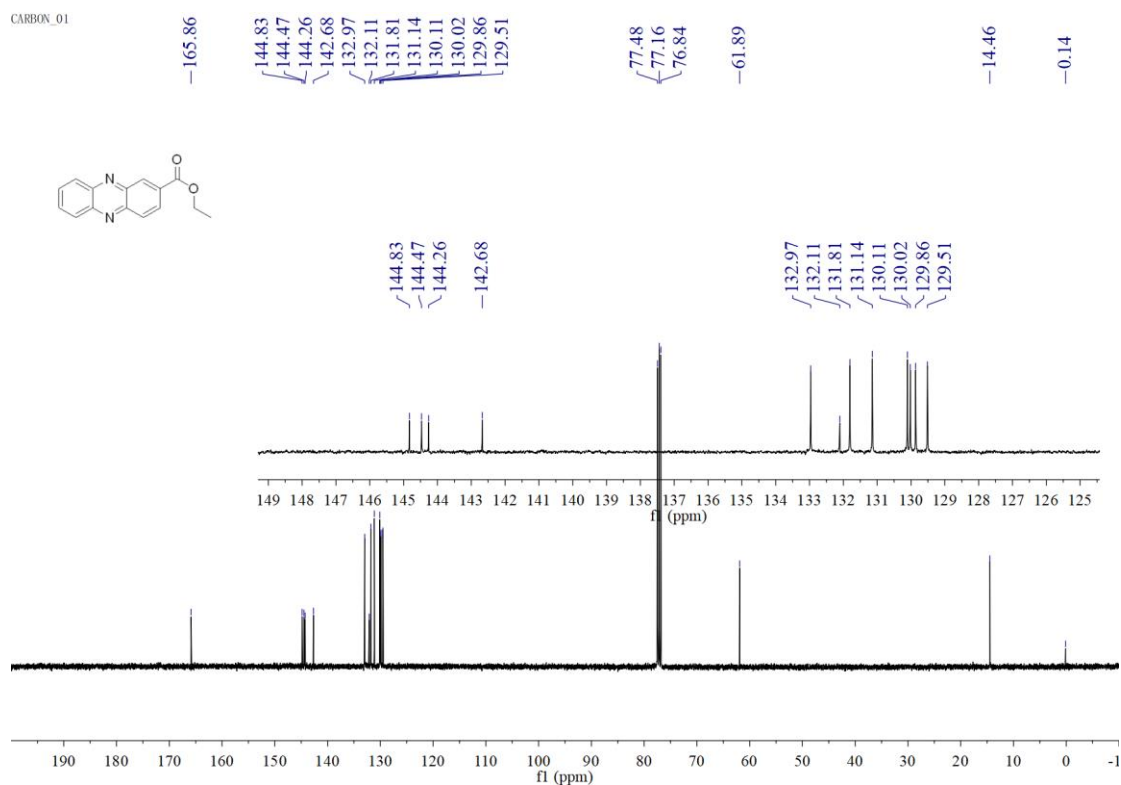

<sup>13</sup>C NMR spectrum of **4i** in CDCl<sub>3</sub>

PROTON\_01

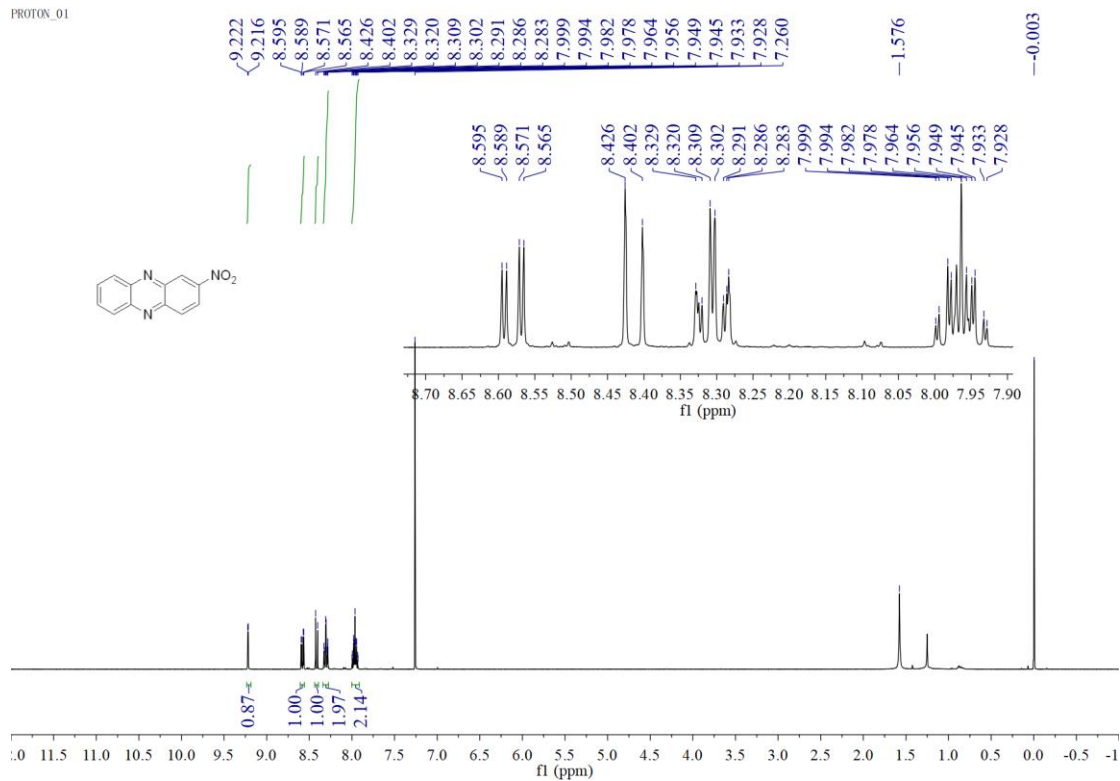

$^1\text{H}$  NMR spectrum of **4j** in  $\text{CDCl}_3$

CARBON\_01

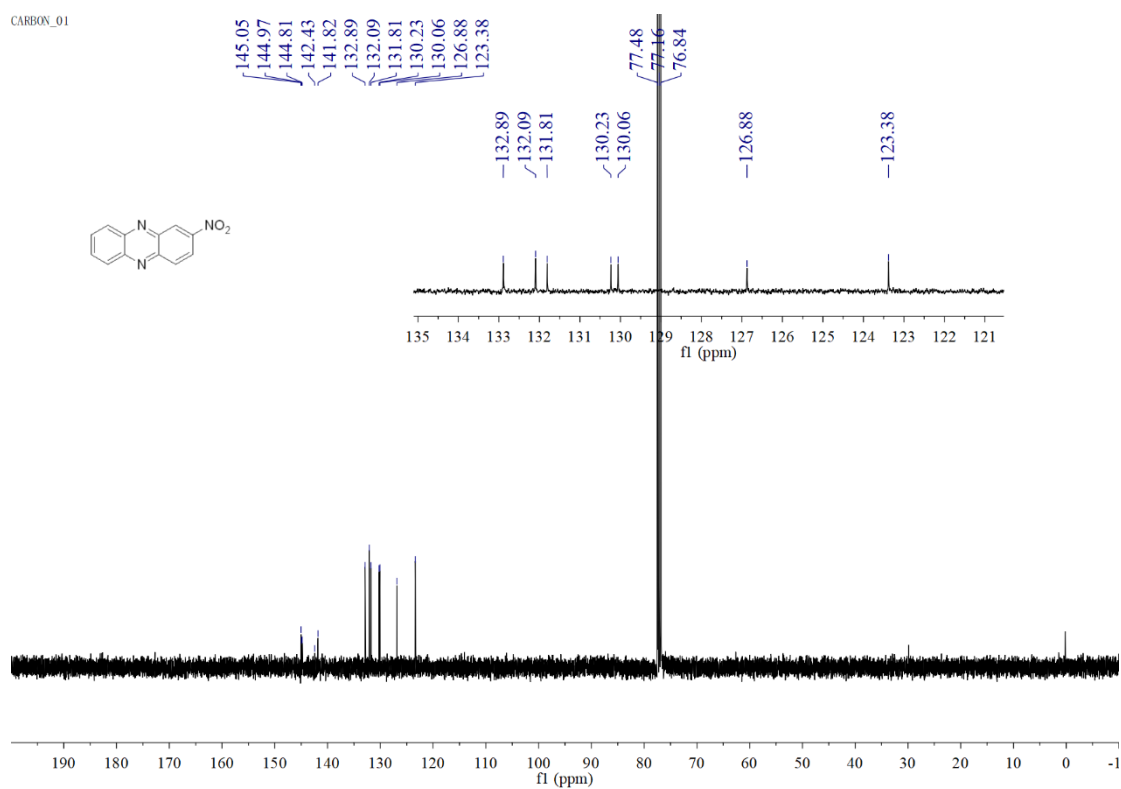

$^{13}\text{C}$  NMR spectrum of **4j** in  $\text{CDCl}_3$

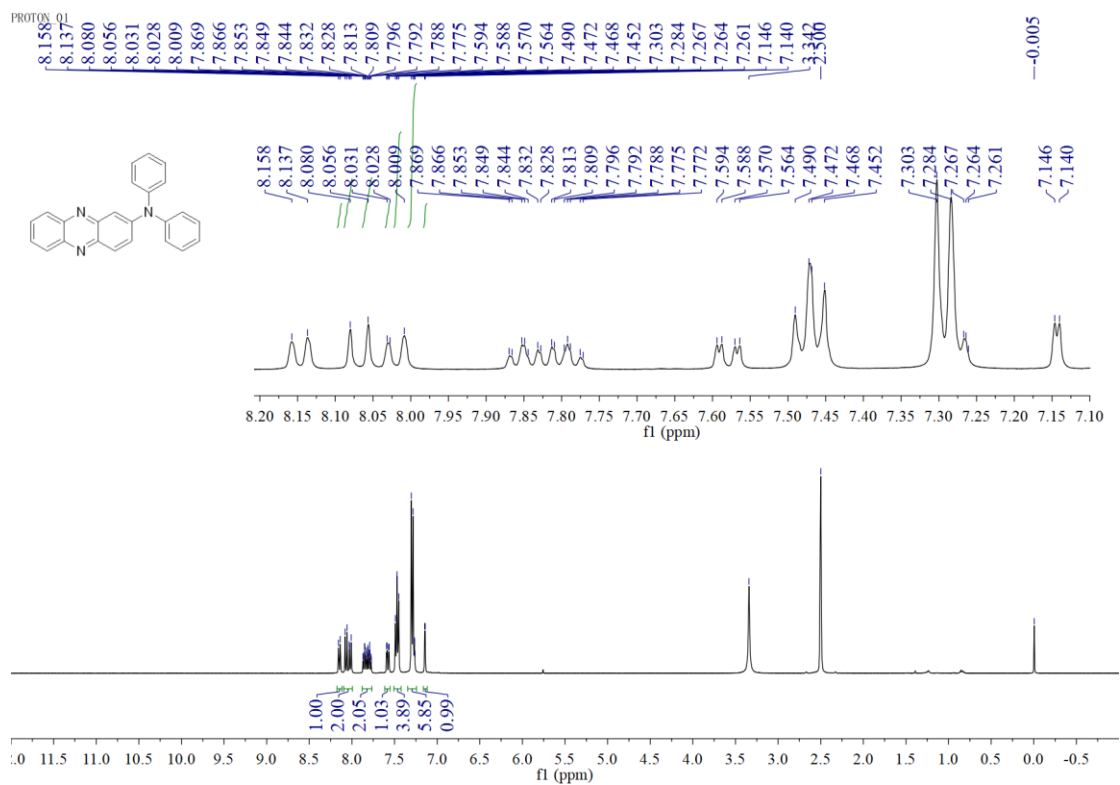

$^1\text{H}$  NMR spectrum of **4k** in  $\text{DMSO-}d_6$

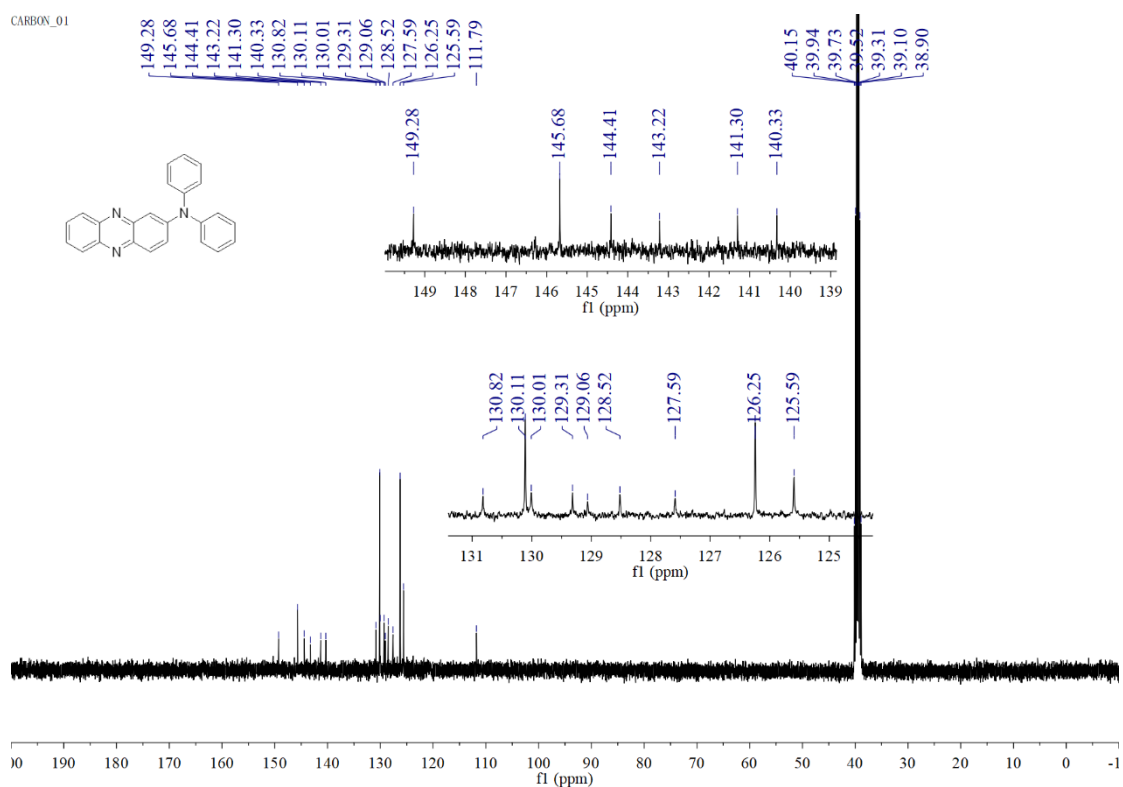

$^{13}\text{C}$  NMR spectrum of **4k** in  $\text{DMSO-}d_6$

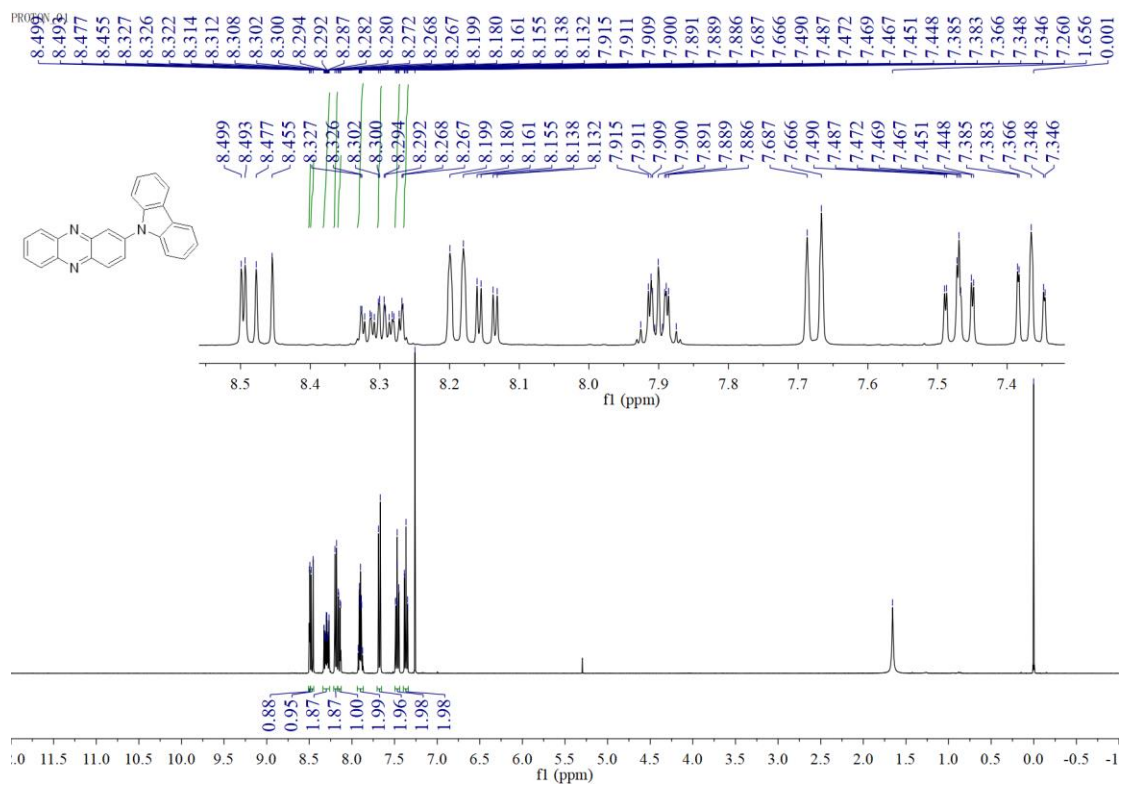

$^1\text{H}$  NMR spectrum of **4I** in CDCl<sub>3</sub>

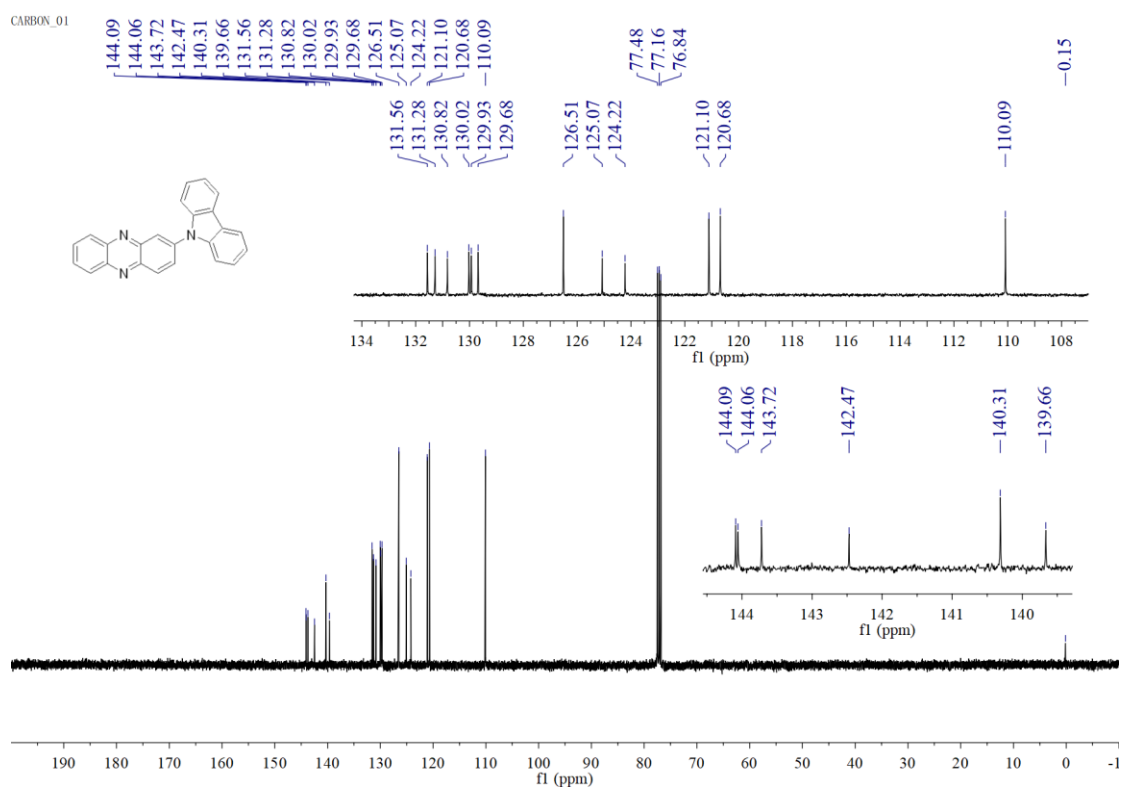

$^{13}\text{C}$  NMR spectrum of **4I** in CDCl<sub>3</sub>

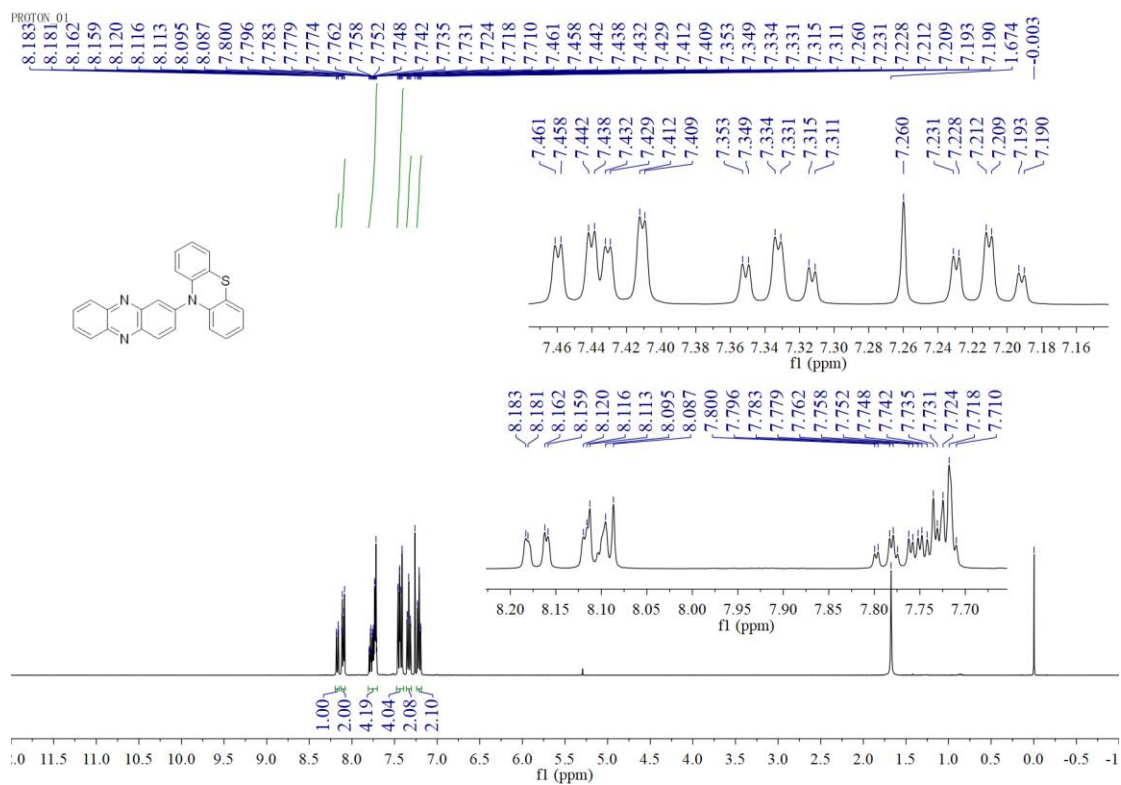

<sup>1</sup>H NMR spectrum of **4m** in CDCl<sub>3</sub>

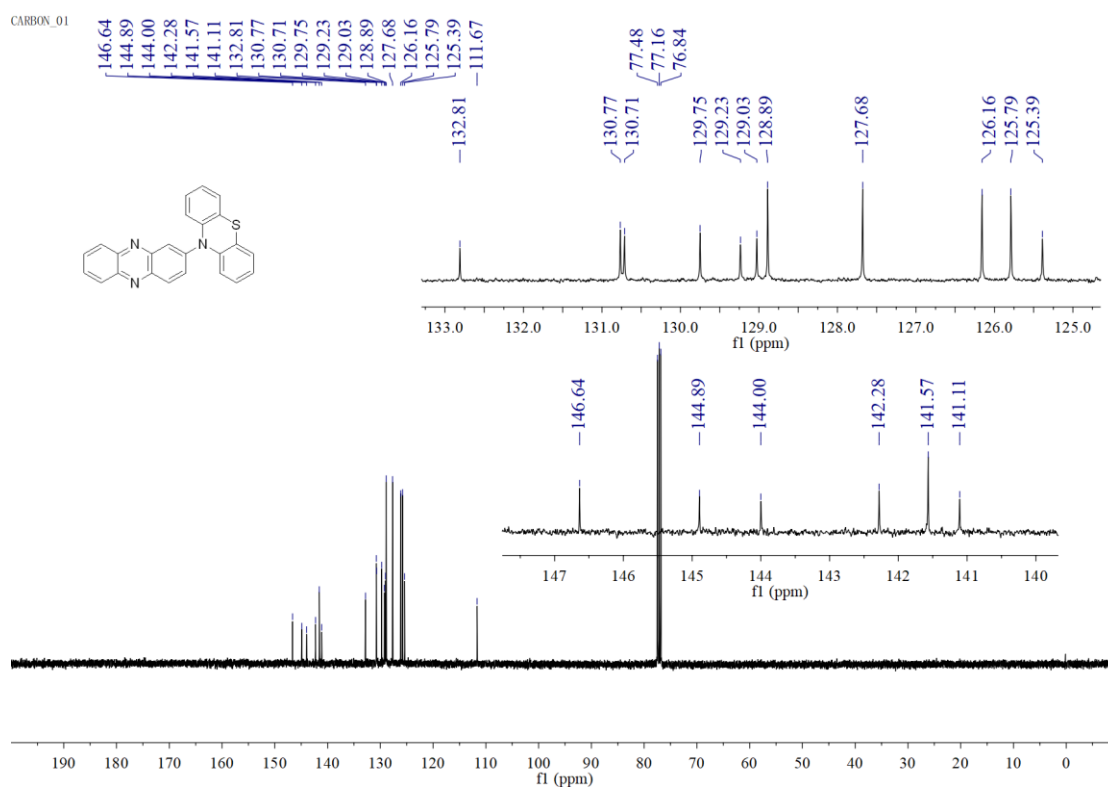

<sup>13</sup>C NMR spectrum of **4m** in CDCl<sub>3</sub>



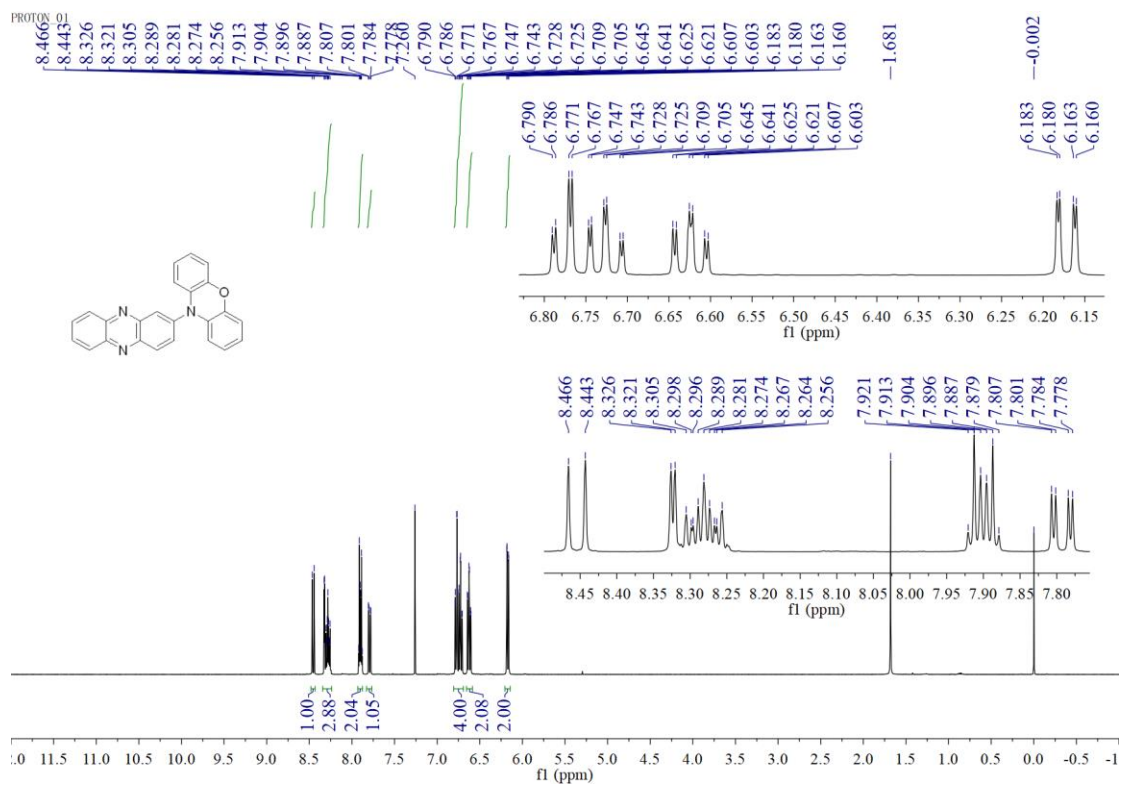

<sup>1</sup>H NMR spectrum of **4n** in CDCl<sub>3</sub>

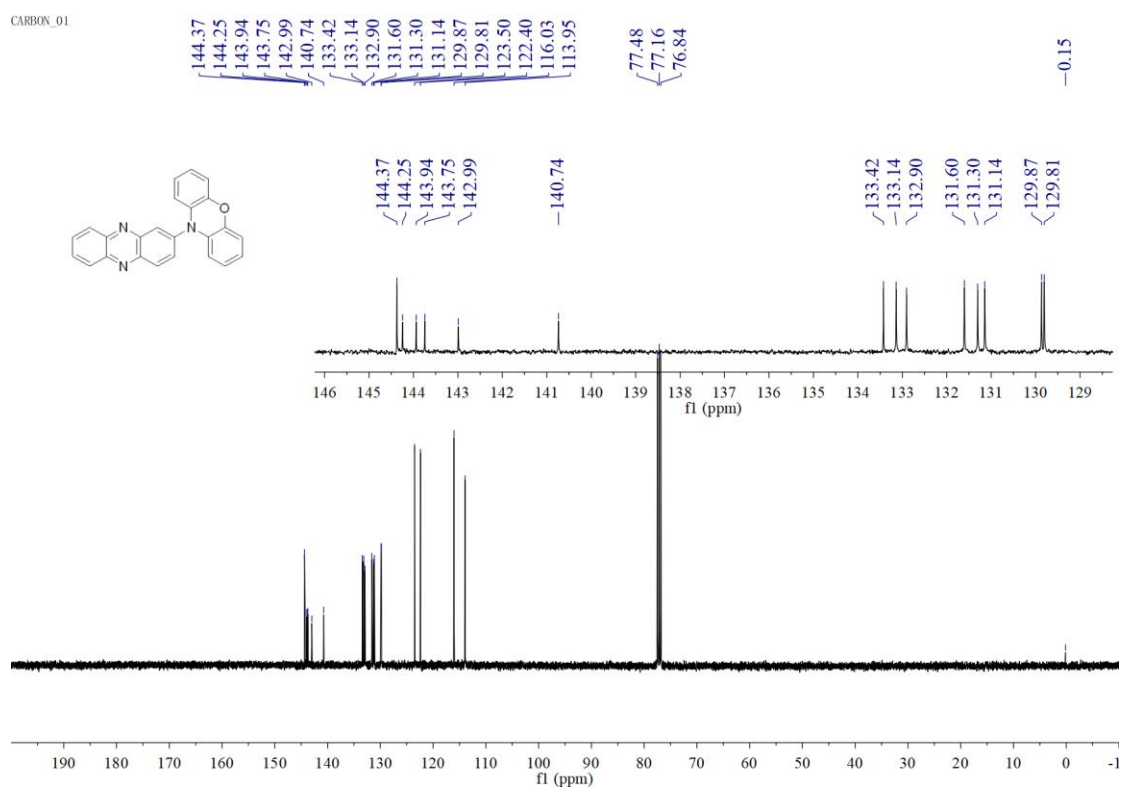

<sup>13</sup>C NMR spectrum of **4n** in CDCl<sub>3</sub>



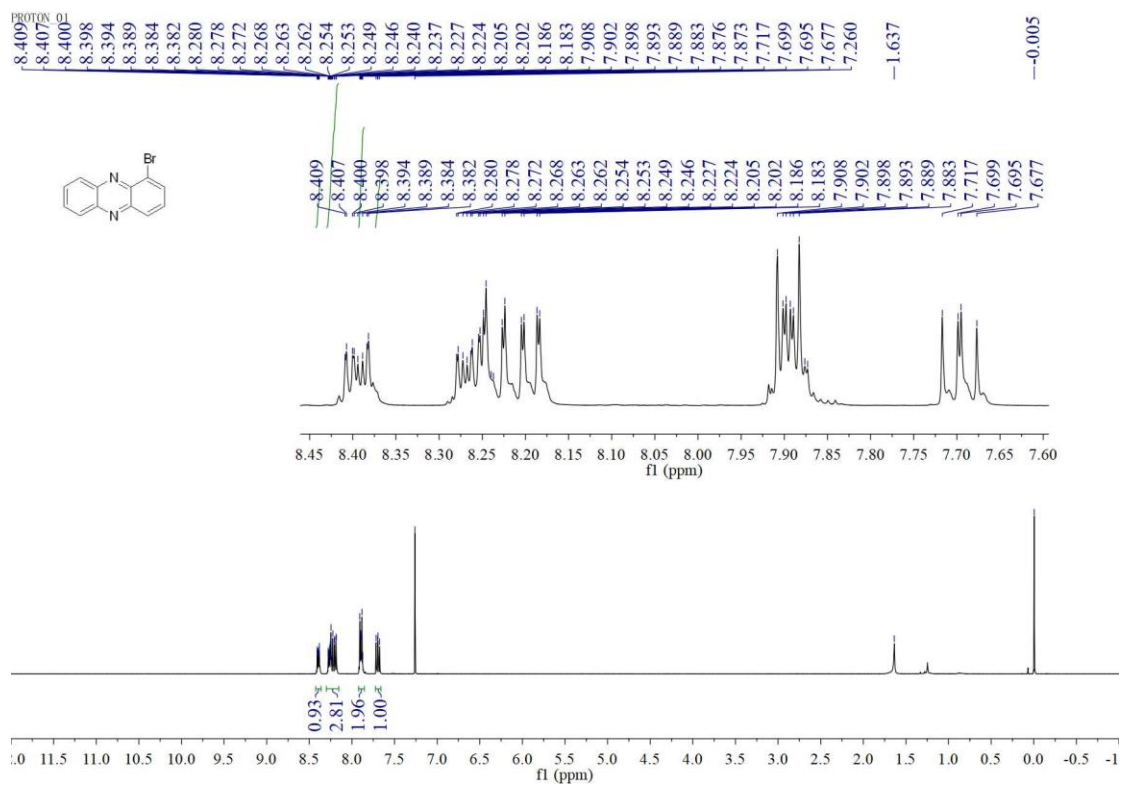

<sup>1</sup>H NMR spectrum of **4o** in CDCl<sub>3</sub>

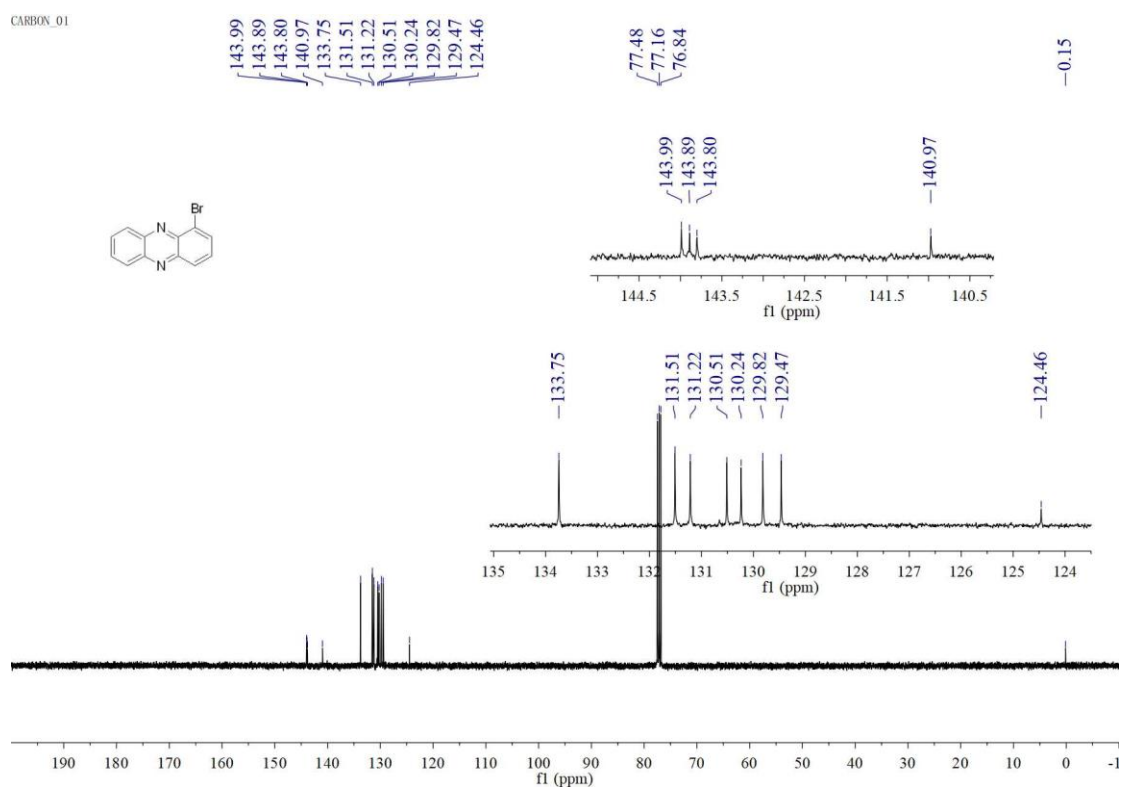

<sup>13</sup>C NMR spectrum of **4o** in CDCl<sub>3</sub>

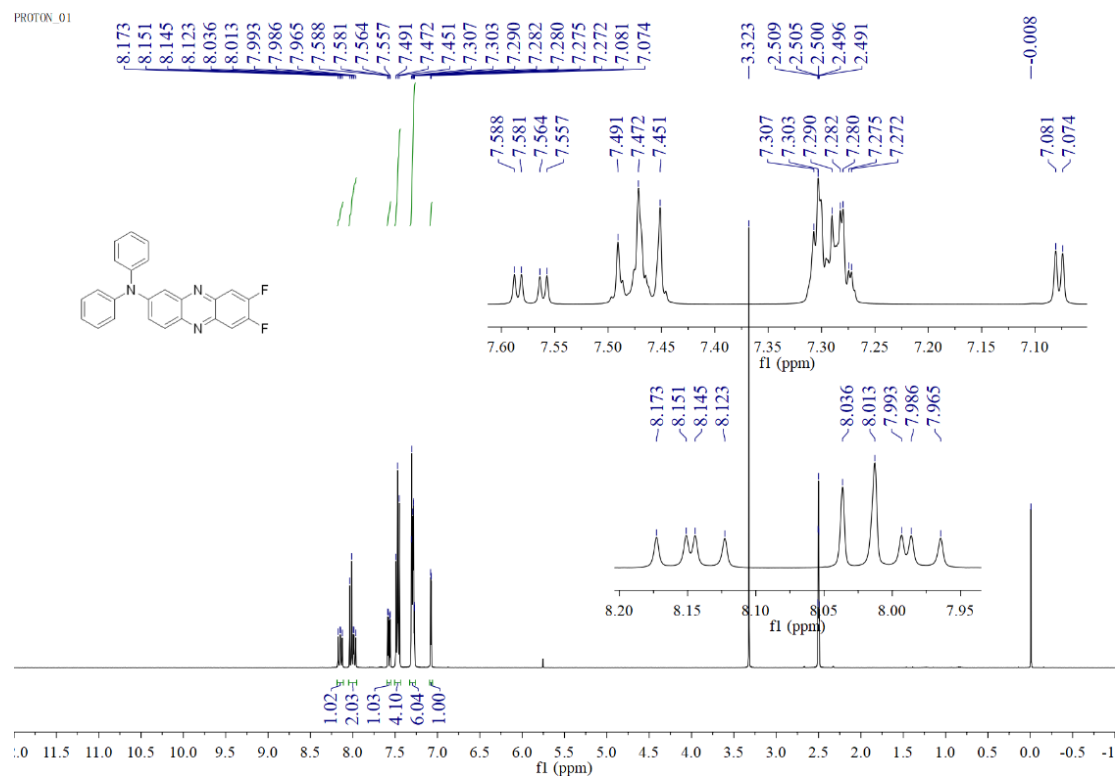

<sup>1</sup>H NMR spectrum of **5a** in DMSO-*d*<sub>6</sub>

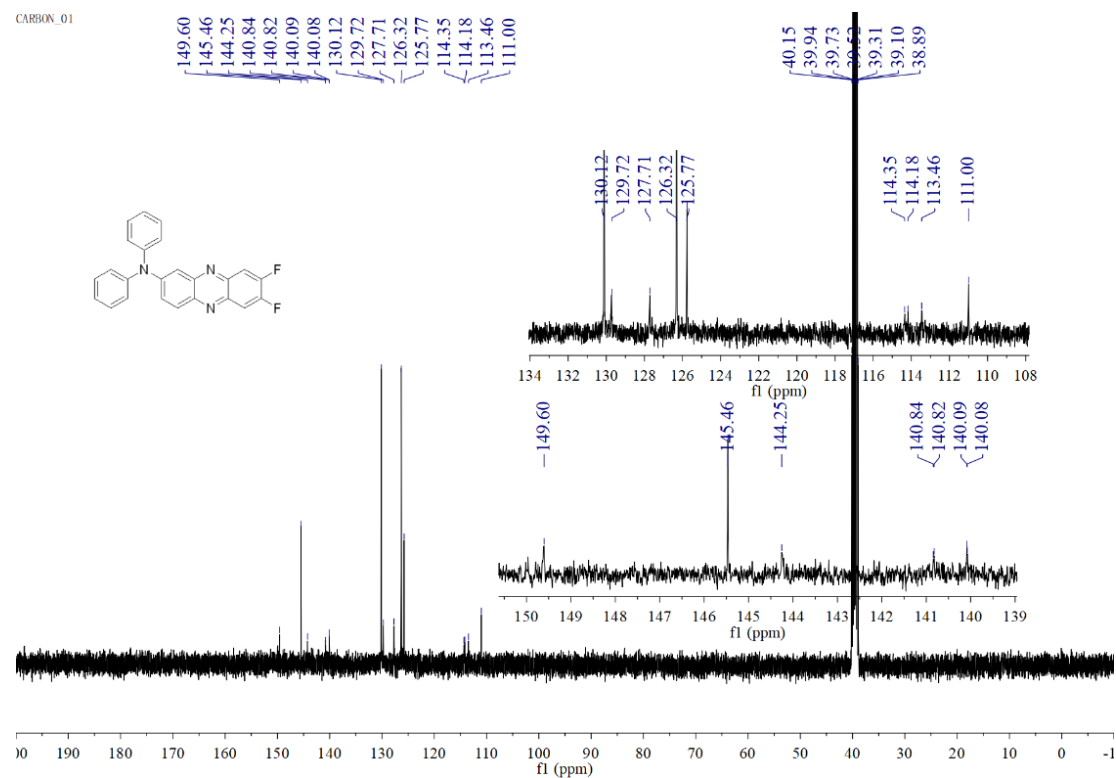

<sup>13</sup>C NMR spectrum of **5a** in DMSO-*d*<sub>6</sub>

FLUORINE\_01

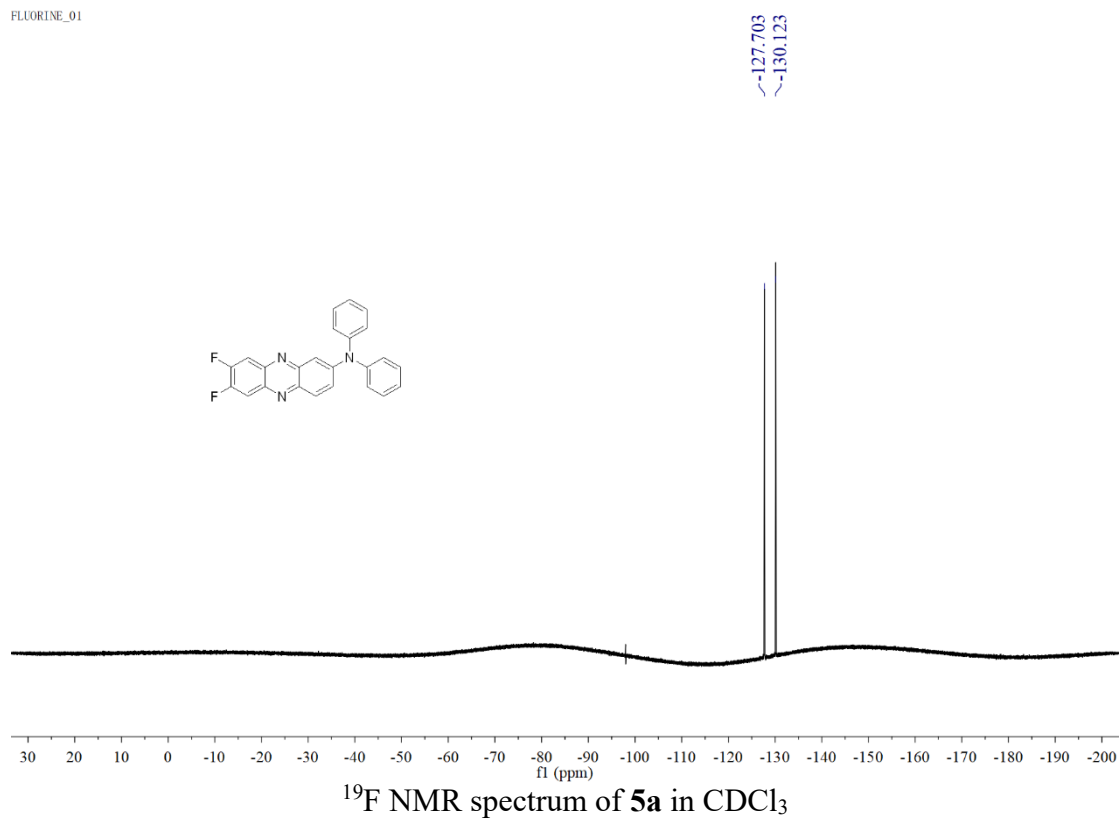

PROTON\_01

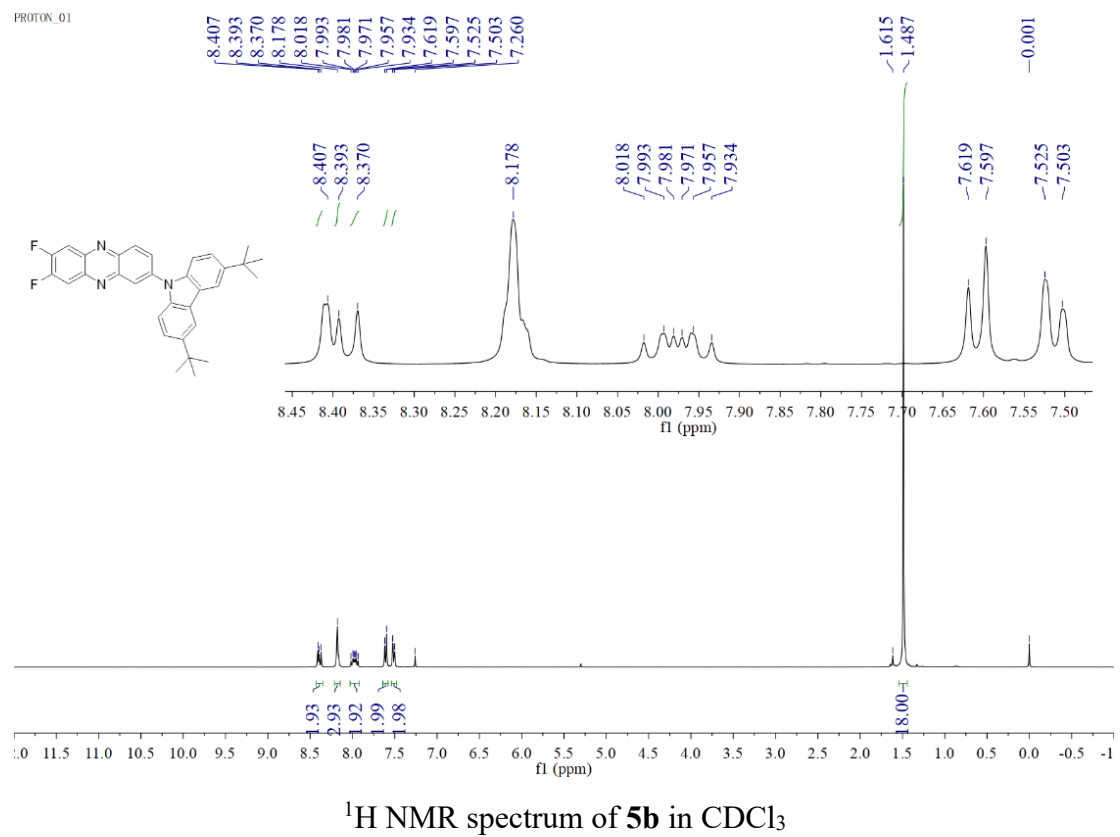

CARBON\_01

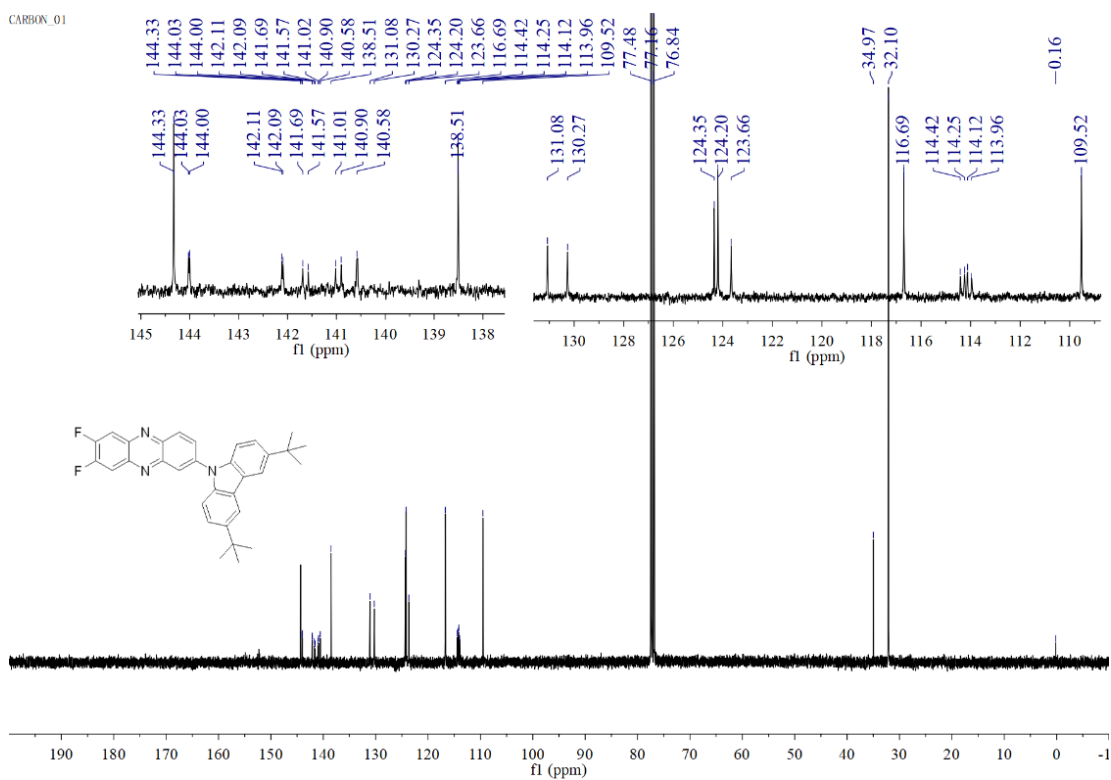<sup>13</sup>C NMR spectrum of **5b** in CDCl<sub>3</sub>

FLUORINE\_01

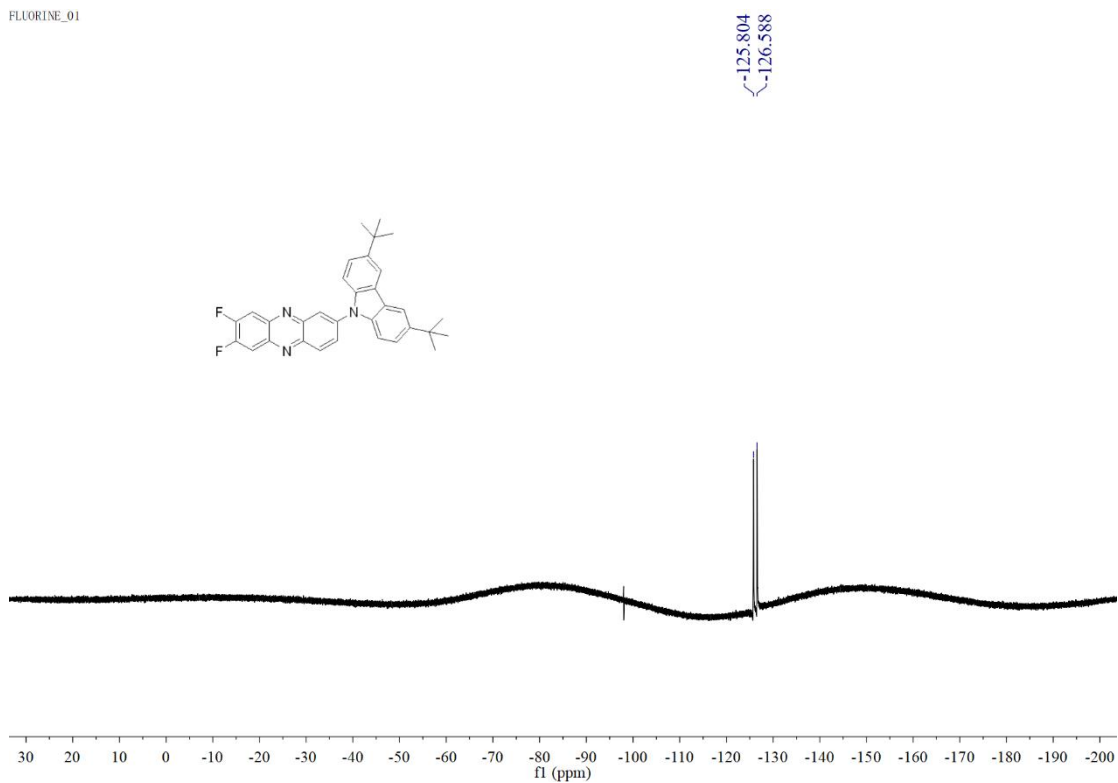<sup>19</sup>F NMR spectrum of **5b** in CDCl<sub>3</sub>

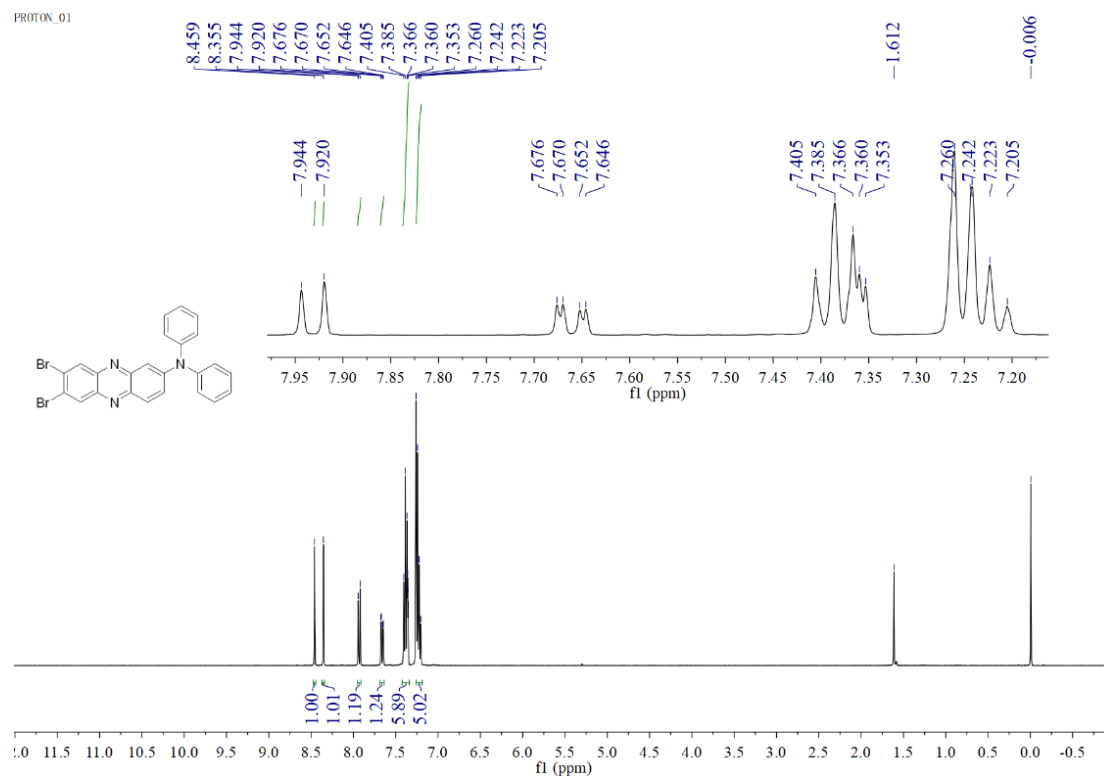

<sup>1</sup>H NMR spectrum of **5c** in CDCl<sub>3</sub>

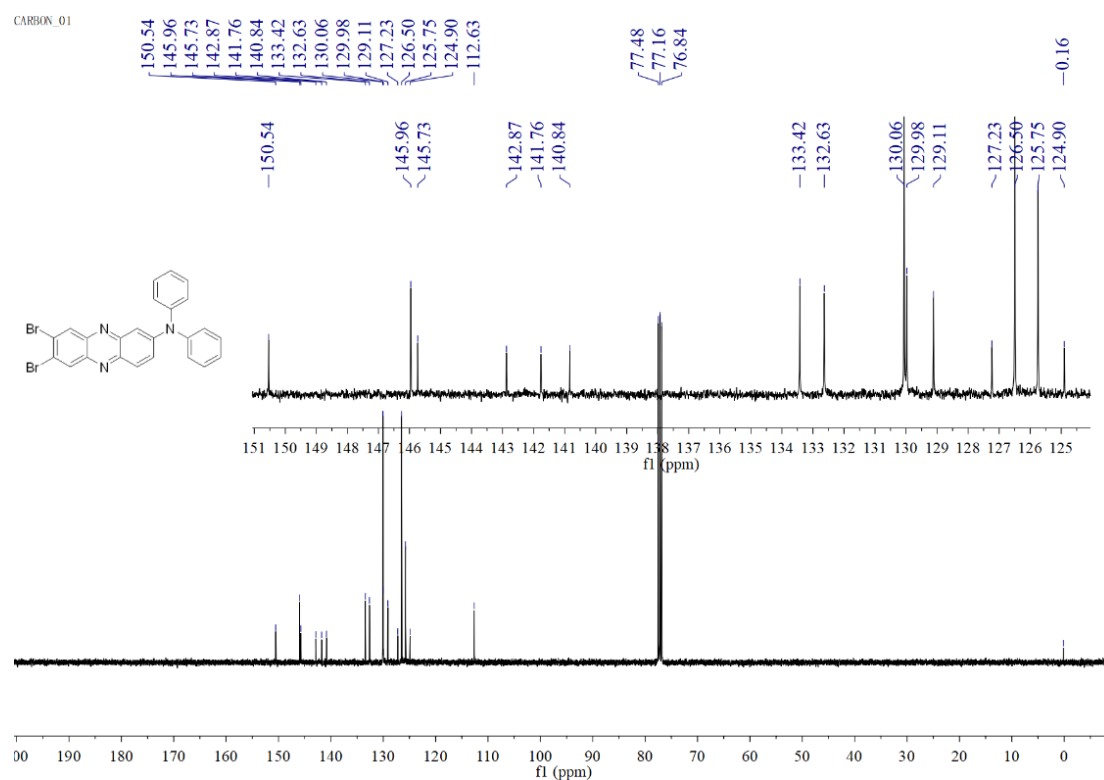

<sup>13</sup>C NMR spectrum of **5c** in CDCl<sub>3</sub>

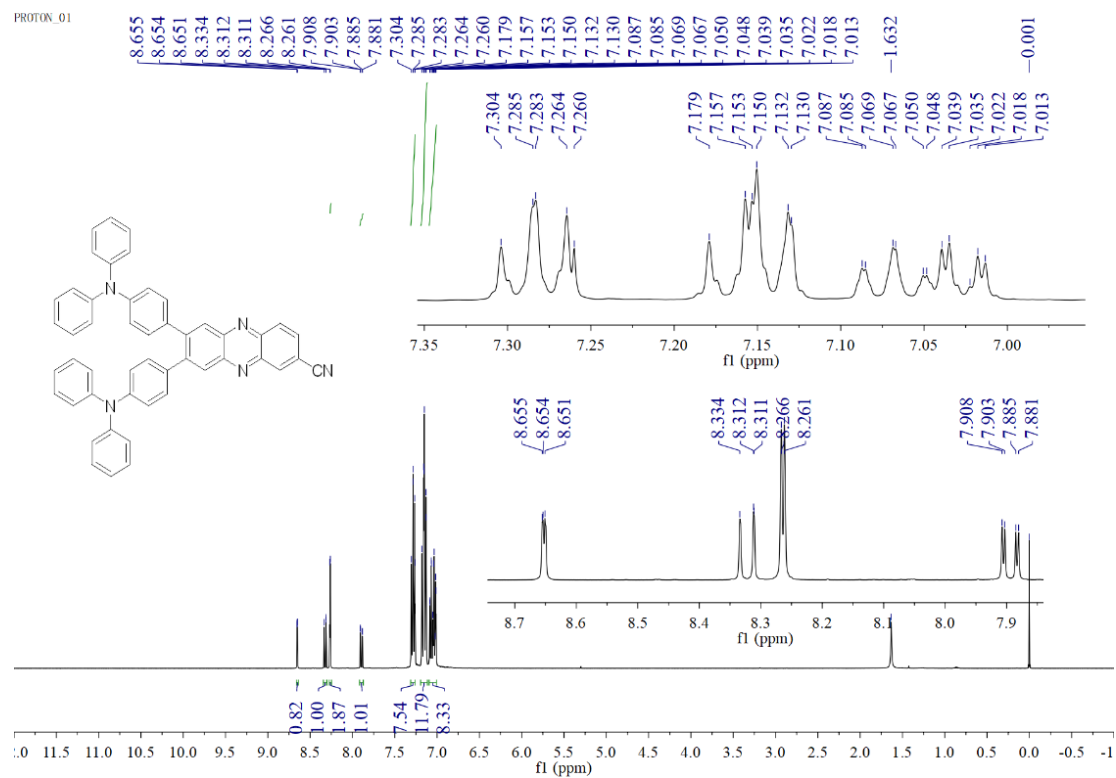

<sup>1</sup>H NMR spectrum of **5d** in CDCl<sub>3</sub>

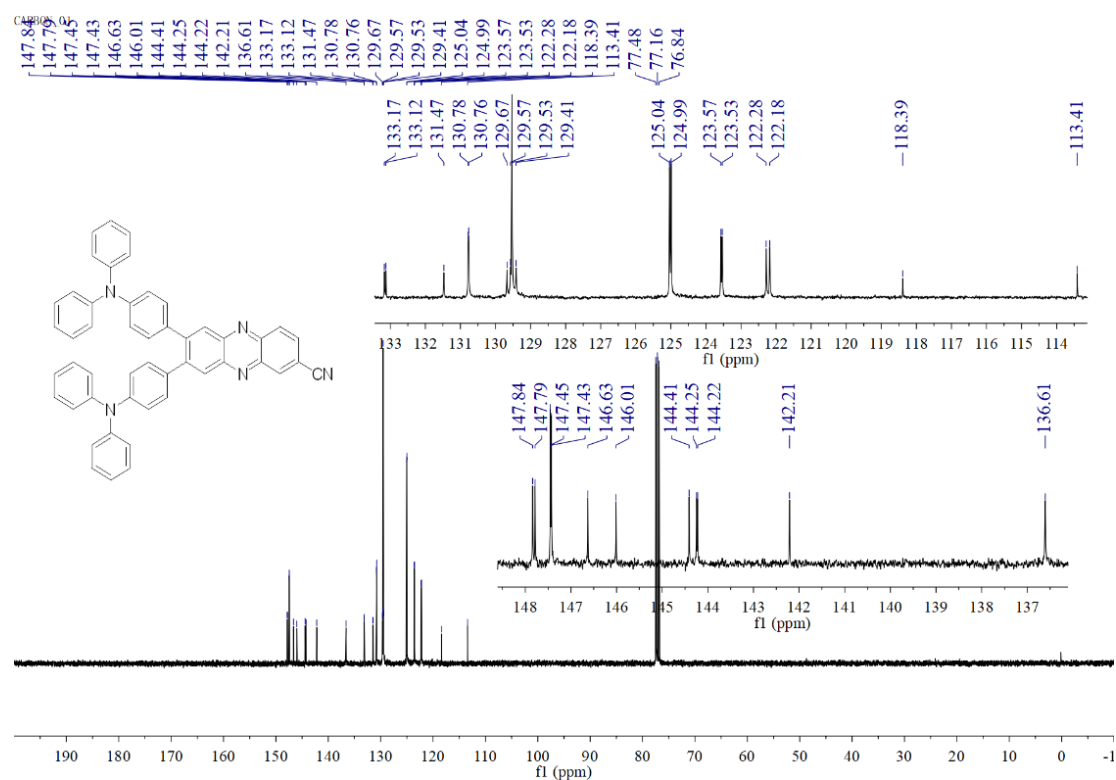

<sup>13</sup>C NMR spectrum of **5d** in CDCl<sub>3</sub>

PROTON\_01

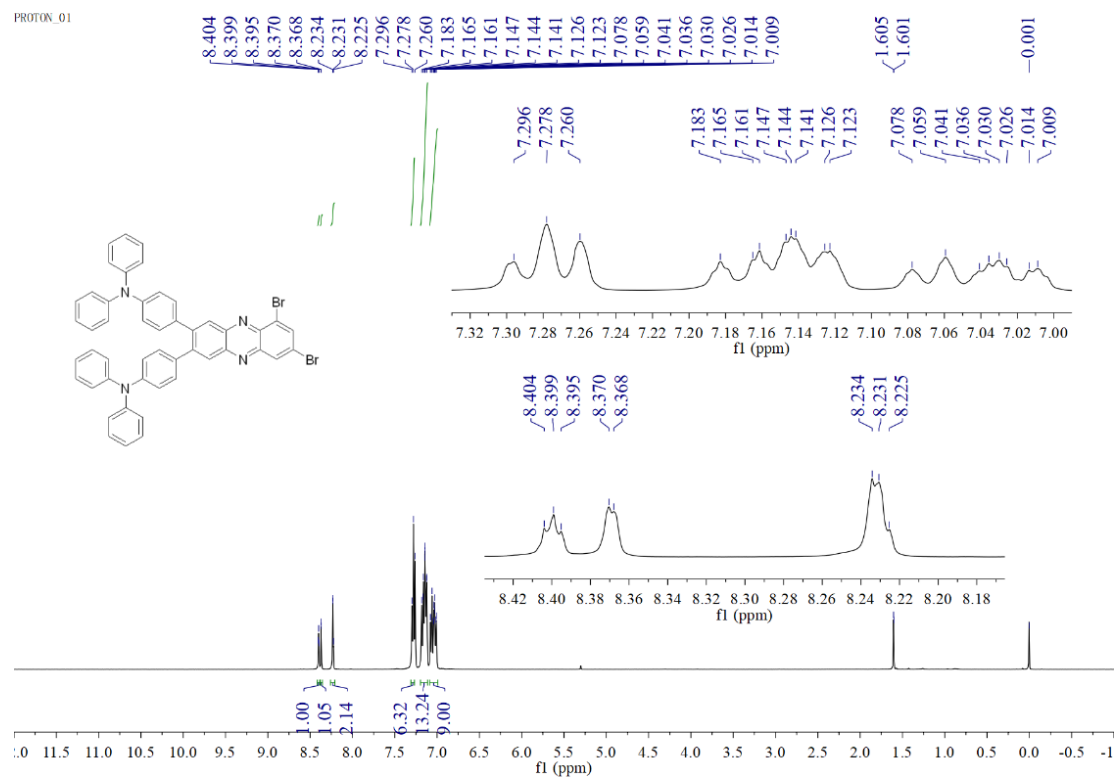

<sup>1</sup>H NMR spectrum of 5e in CDCl<sub>3</sub>

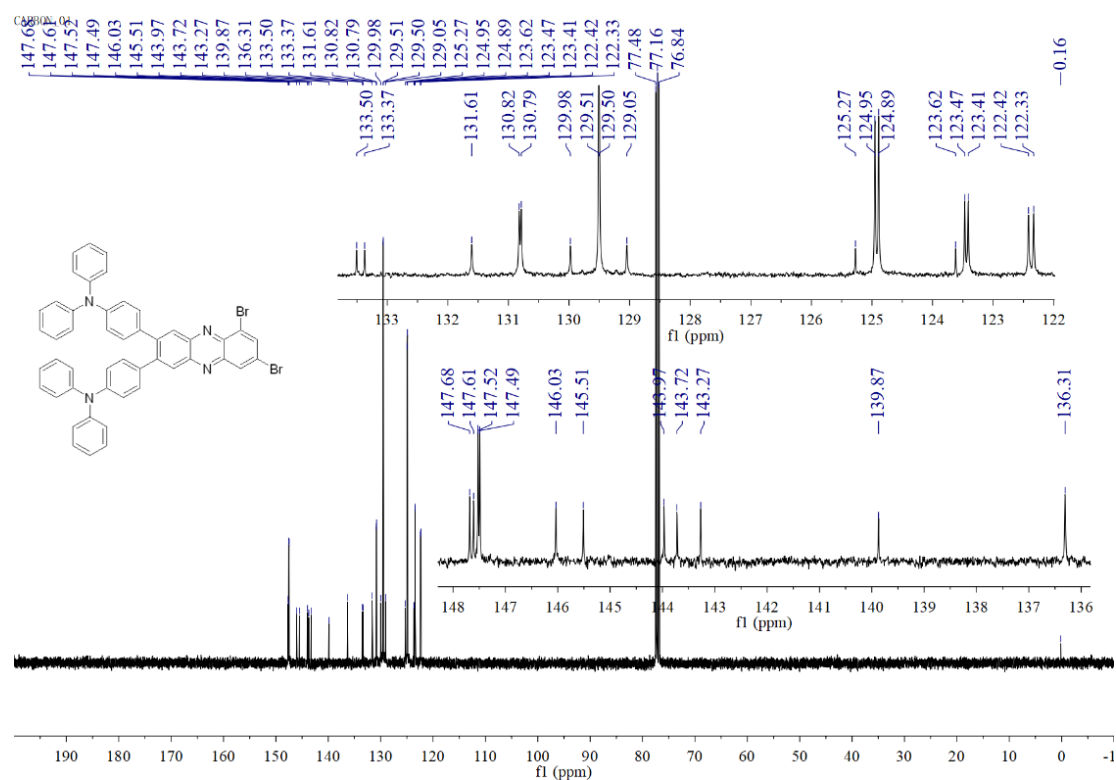

<sup>13</sup>C NMR spectrum of 5e in CDCl<sub>3</sub>

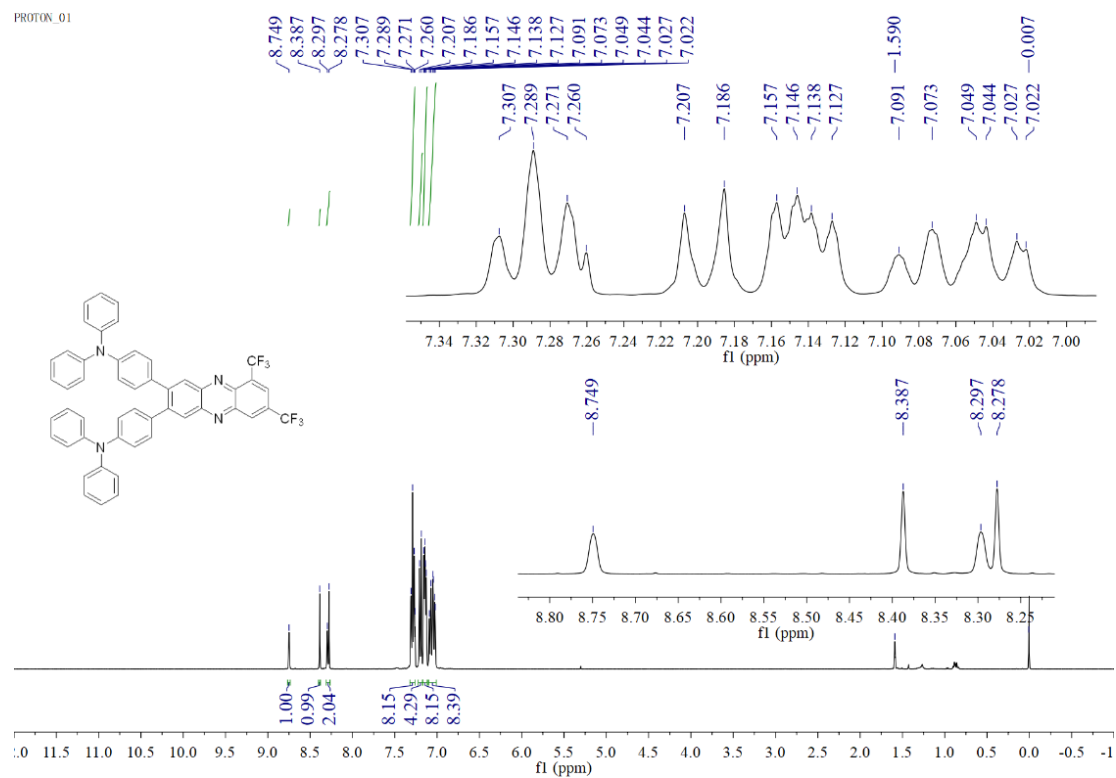

<sup>1</sup>H NMR spectrum of **5f** in CDCl<sub>3</sub>

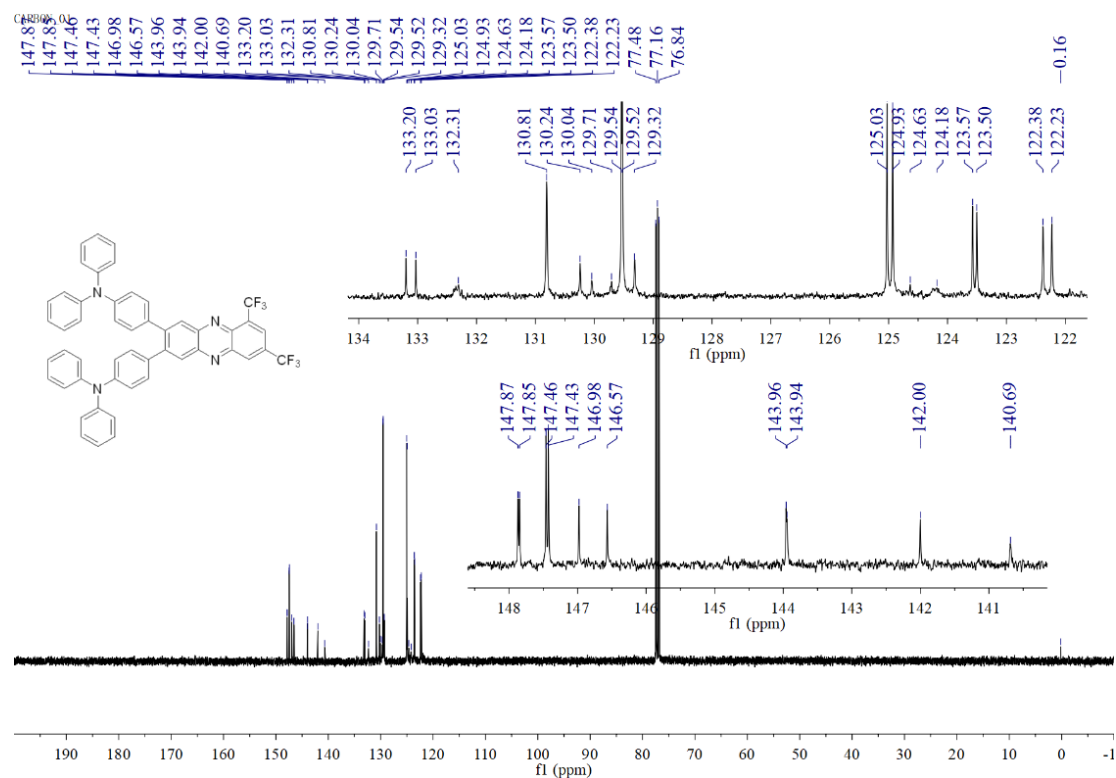

<sup>13</sup>C NMR spectrum of **5f** in CDCl<sub>3</sub>



FLUORINE\_01

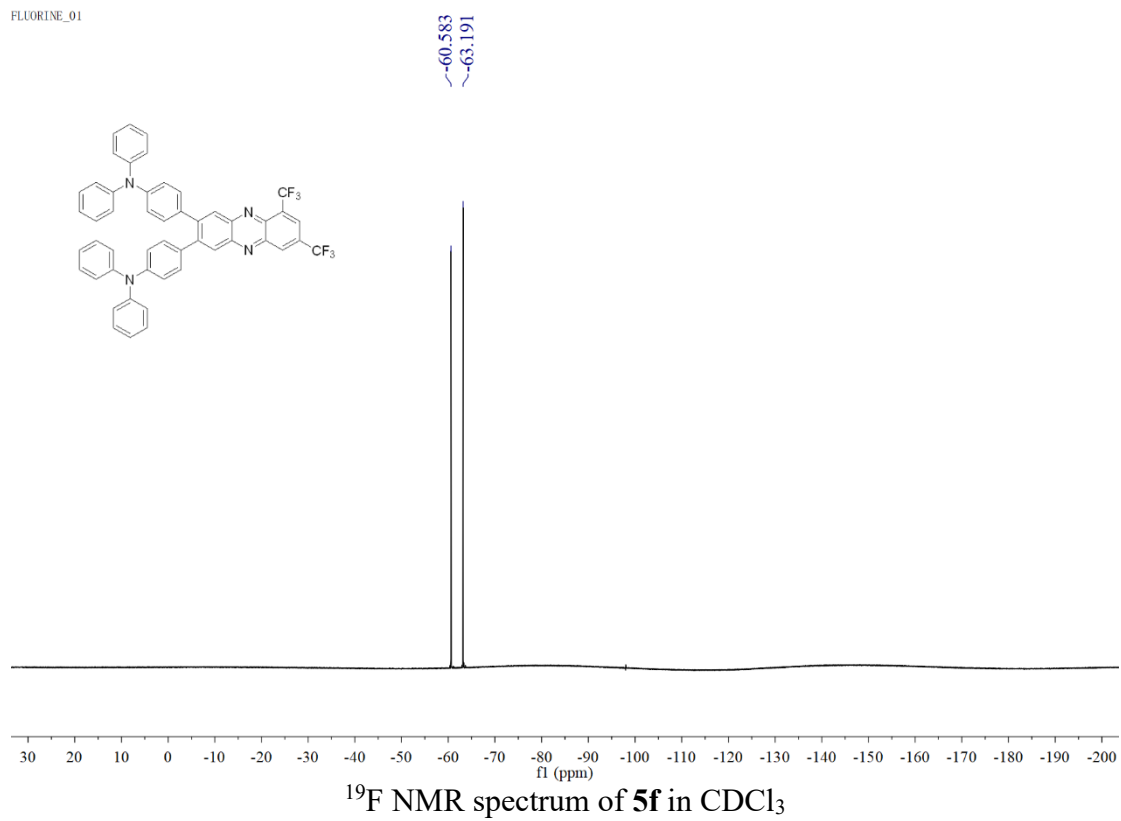

PROTON\_01

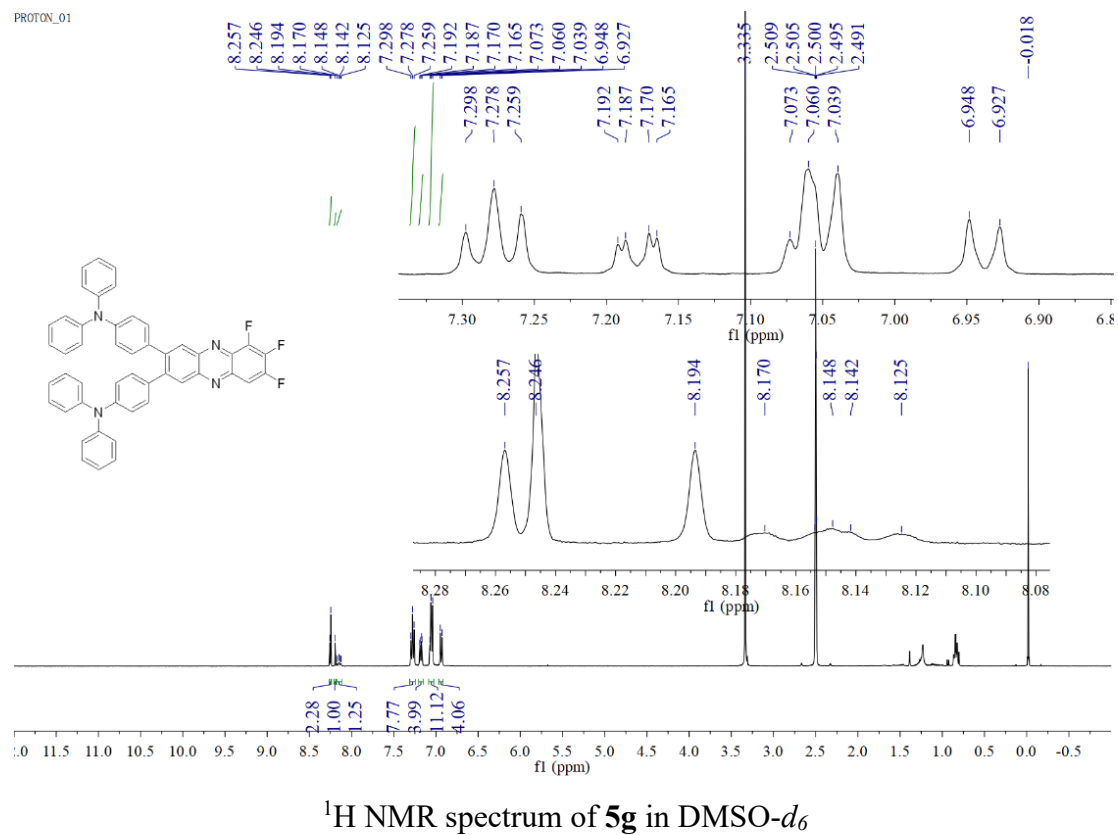

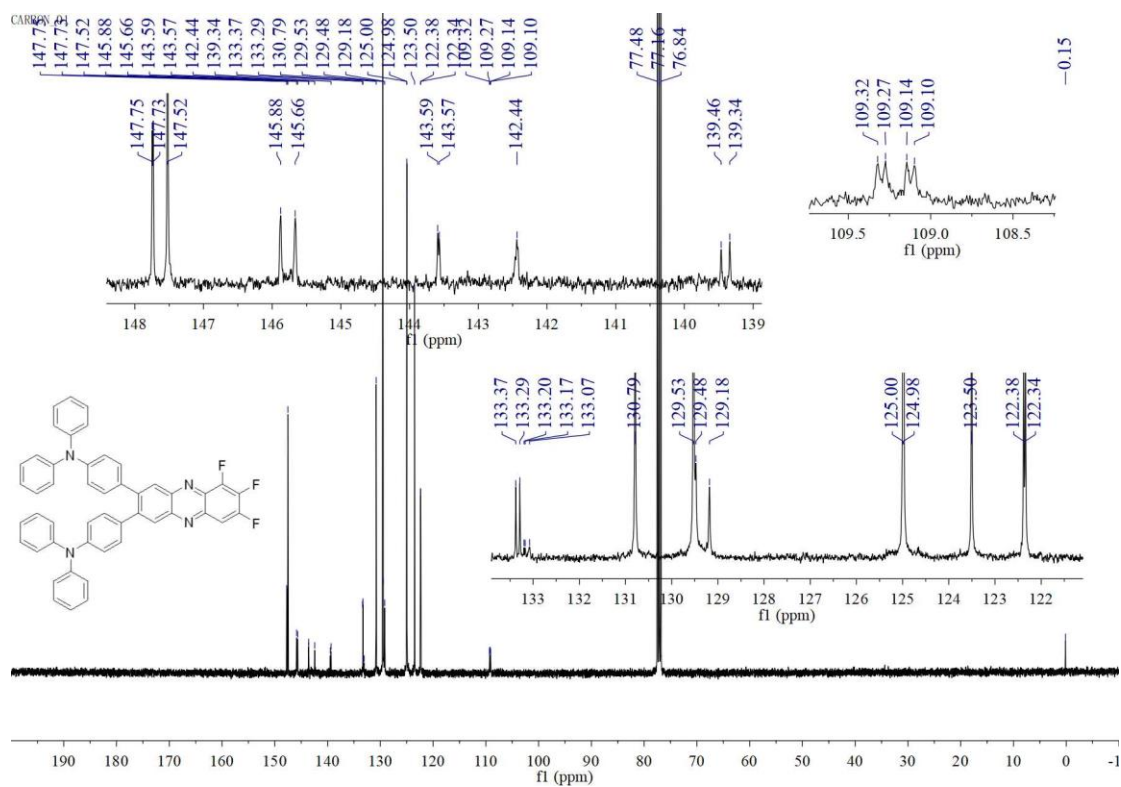

<sup>13</sup>C NMR spectrum of **5g** in CDCl<sub>3</sub>

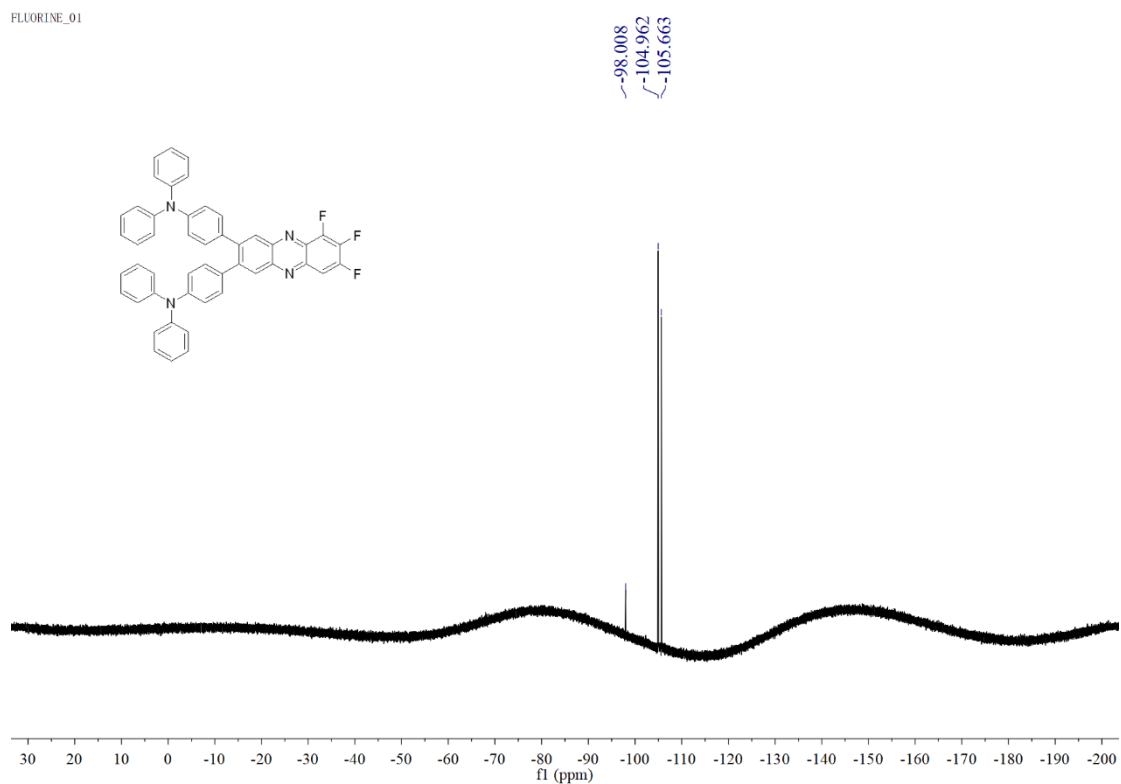

<sup>19</sup>F NMR spectrum of **5g** in CDCl<sub>3</sub>

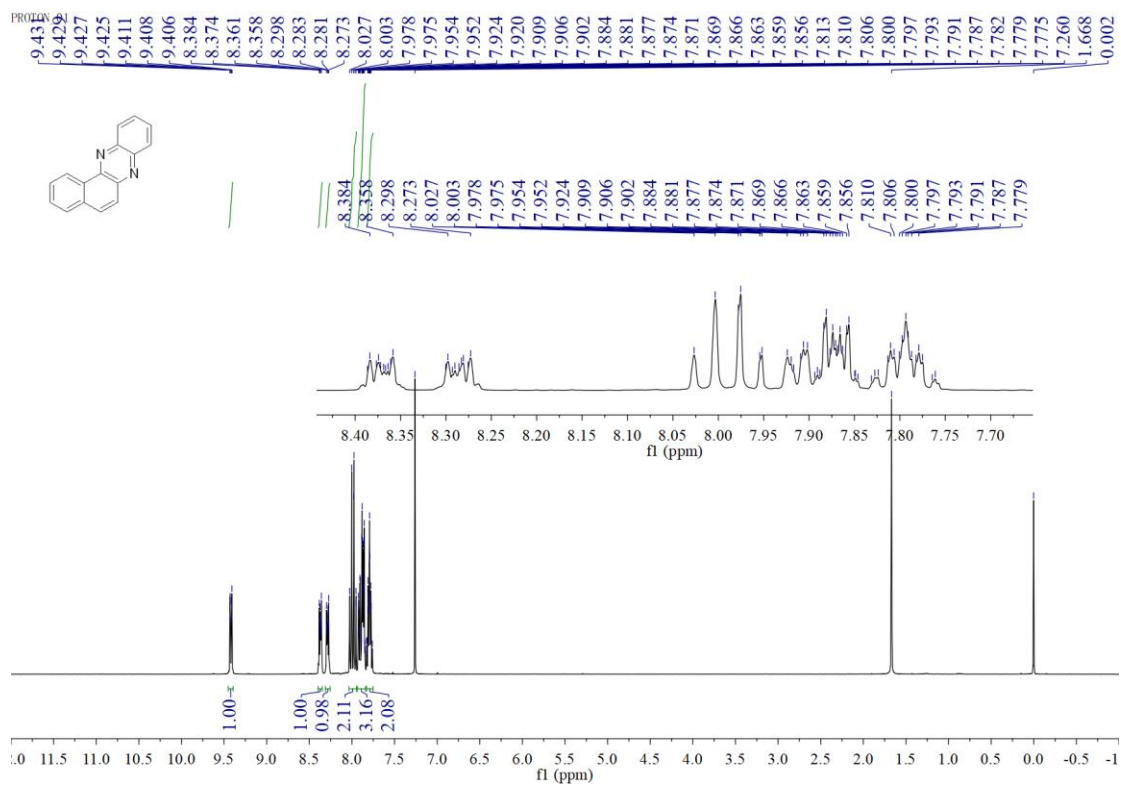

$^1\text{H}$  NMR spectrum of **5h** in  $\text{CDCl}_3$

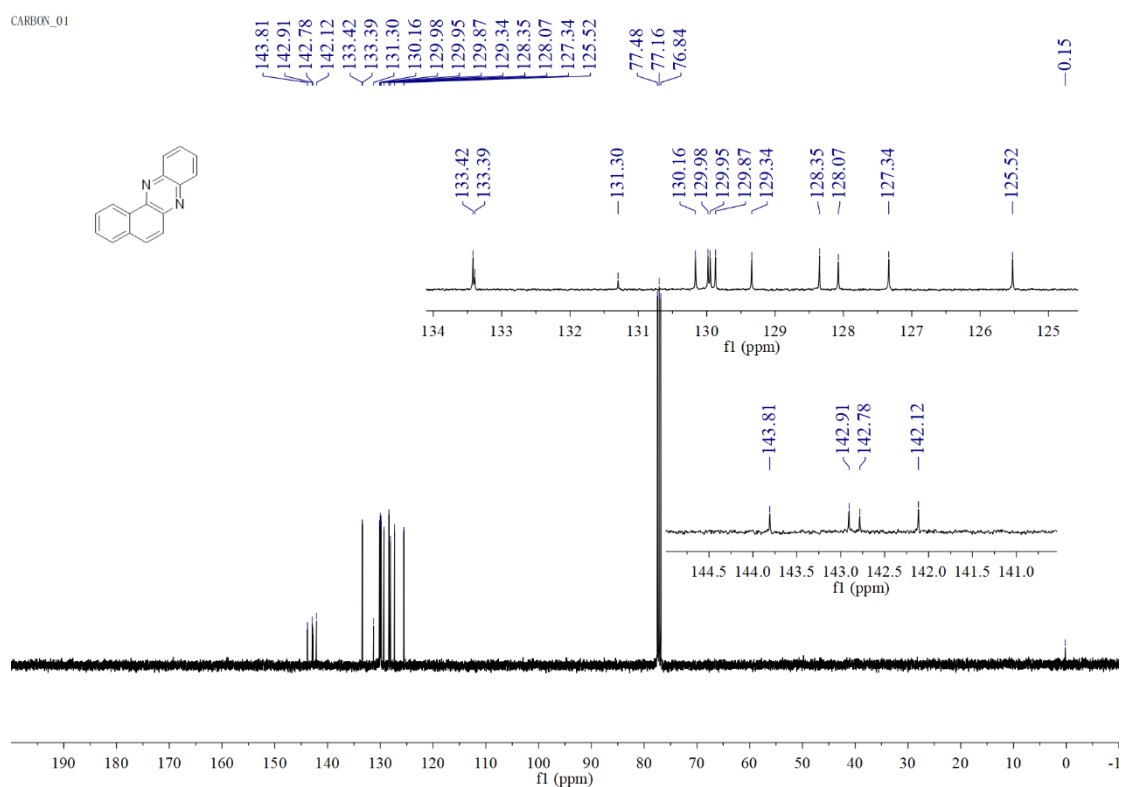

$^{13}\text{C}$  NMR spectrum of **5h** in  $\text{CDCl}_3$

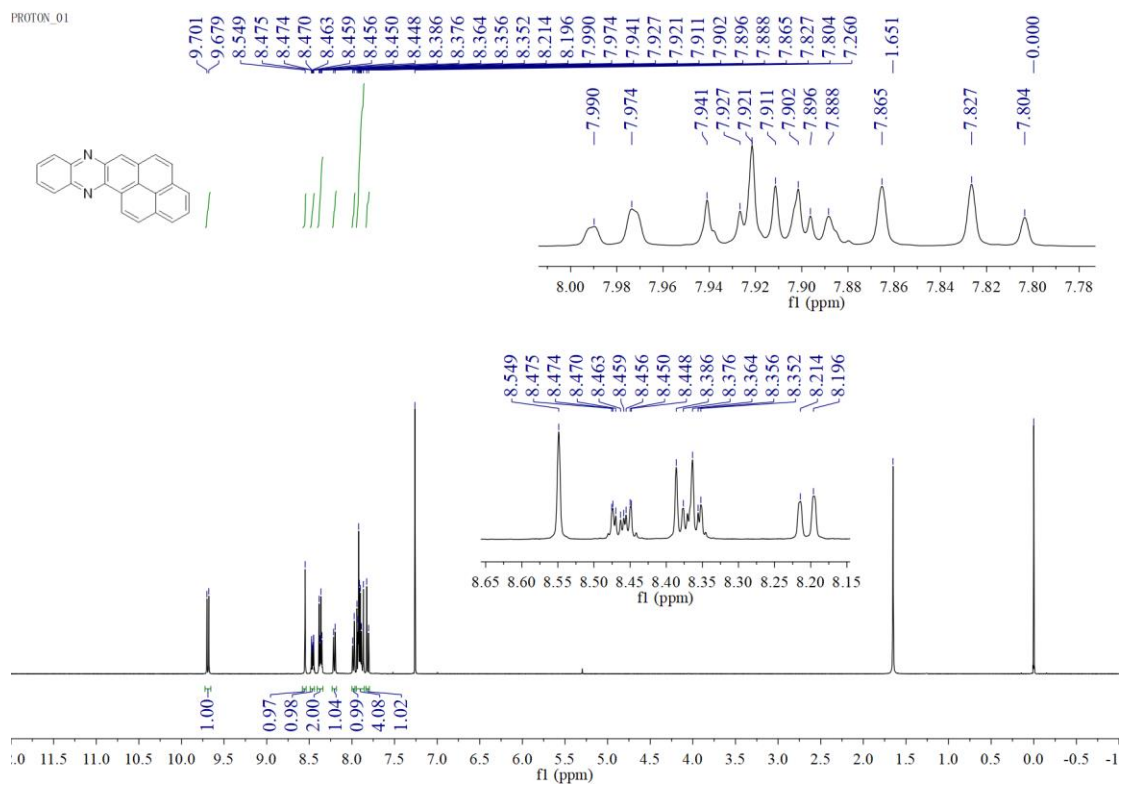

<sup>1</sup>H NMR spectrum of **5i** in CDCl<sub>3</sub>

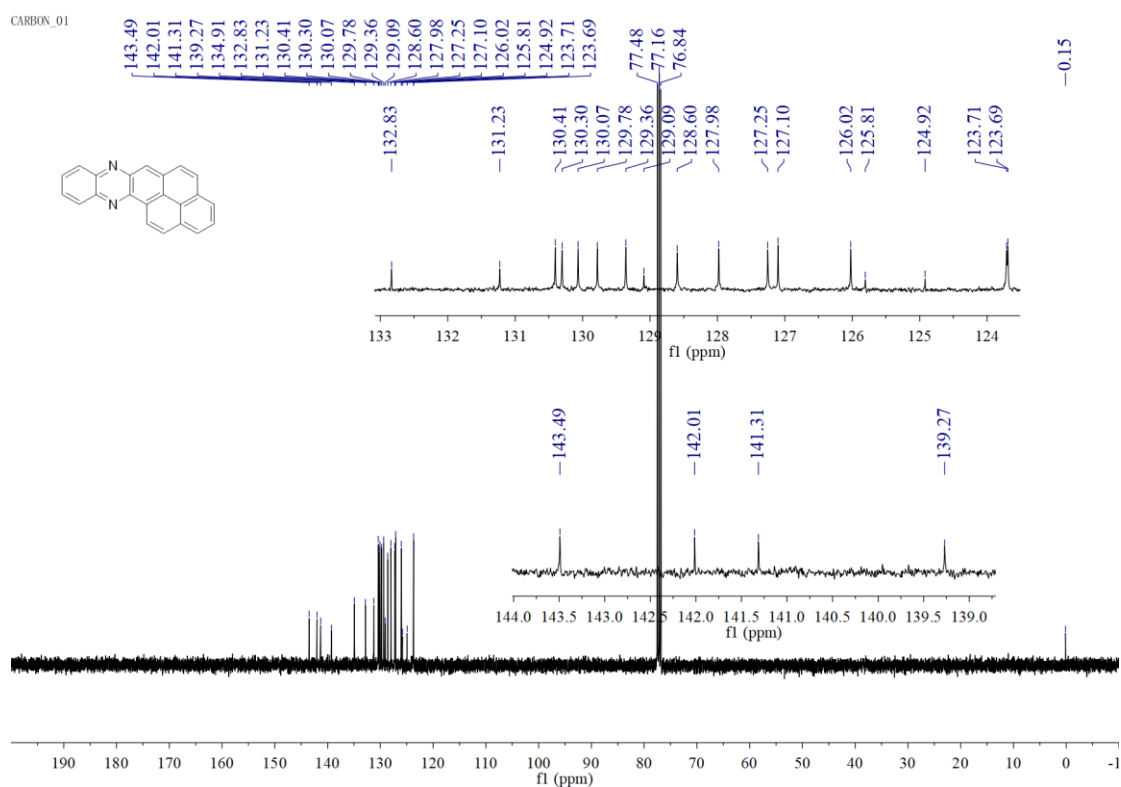

<sup>13</sup>C NMR spectrum of **5i** in CDCl<sub>3</sub>

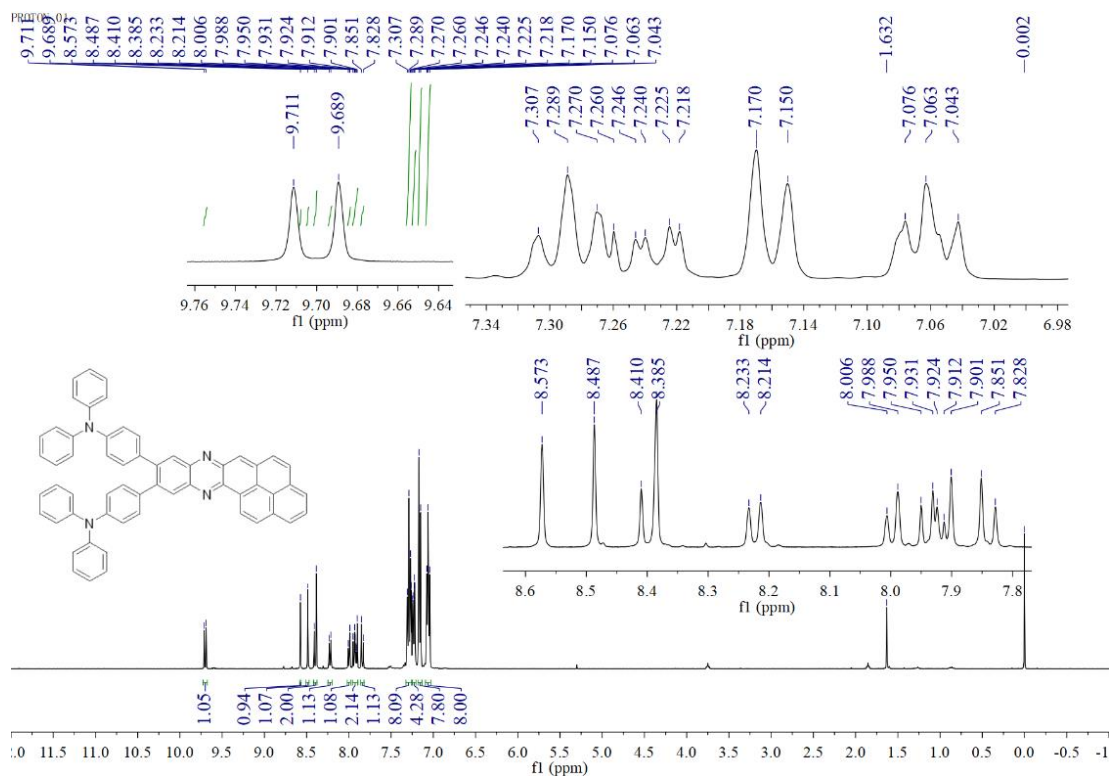

**<sup>1</sup>H NMR spectrum of **5j** in CDCl<sub>3</sub>**

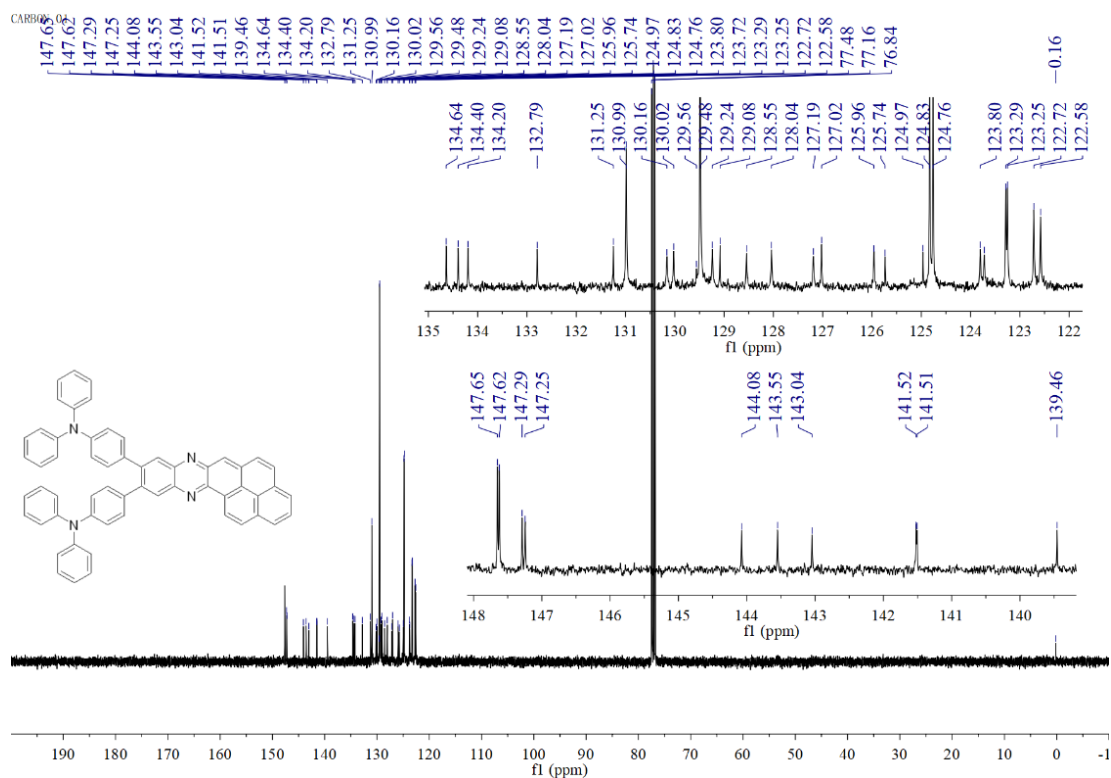

**<sup>13</sup>C NMR spectrum of **5j** in CDCl<sub>3</sub>**



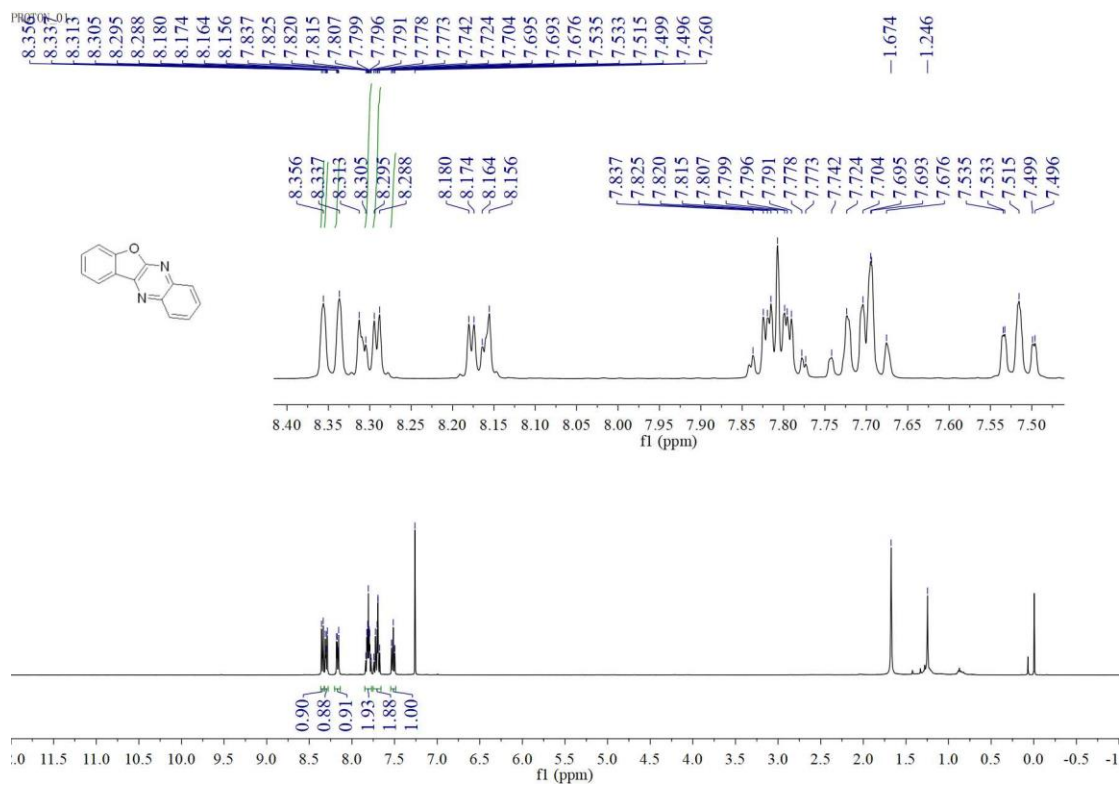

<sup>1</sup>H NMR spectrum of **5l** in CDCl<sub>3</sub>

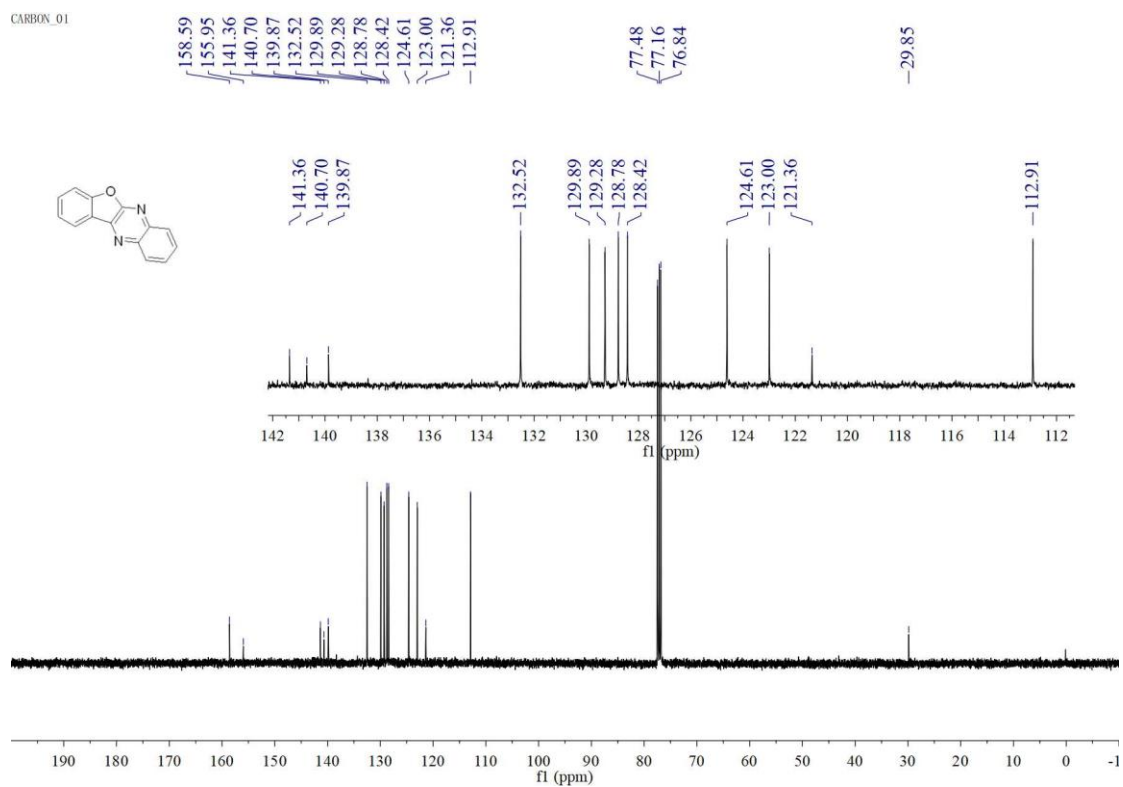

<sup>13</sup>C NMR spectrum of **5l** in CDCl<sub>3</sub>



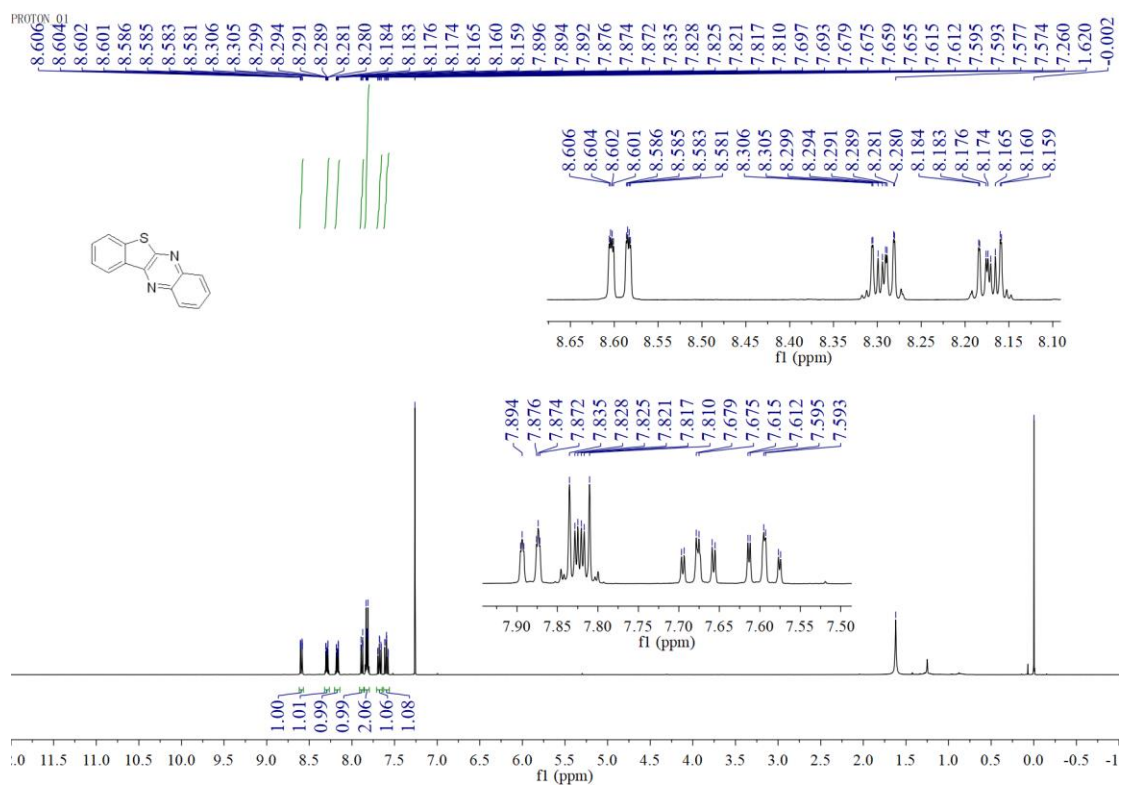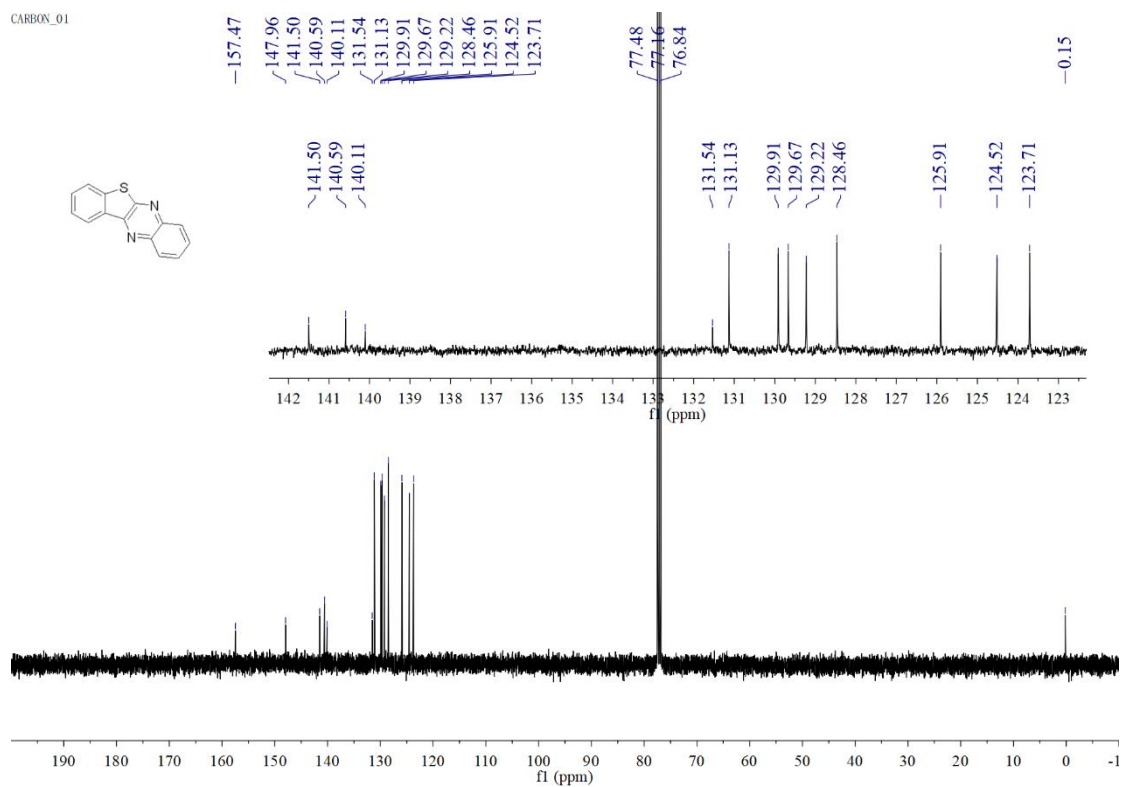



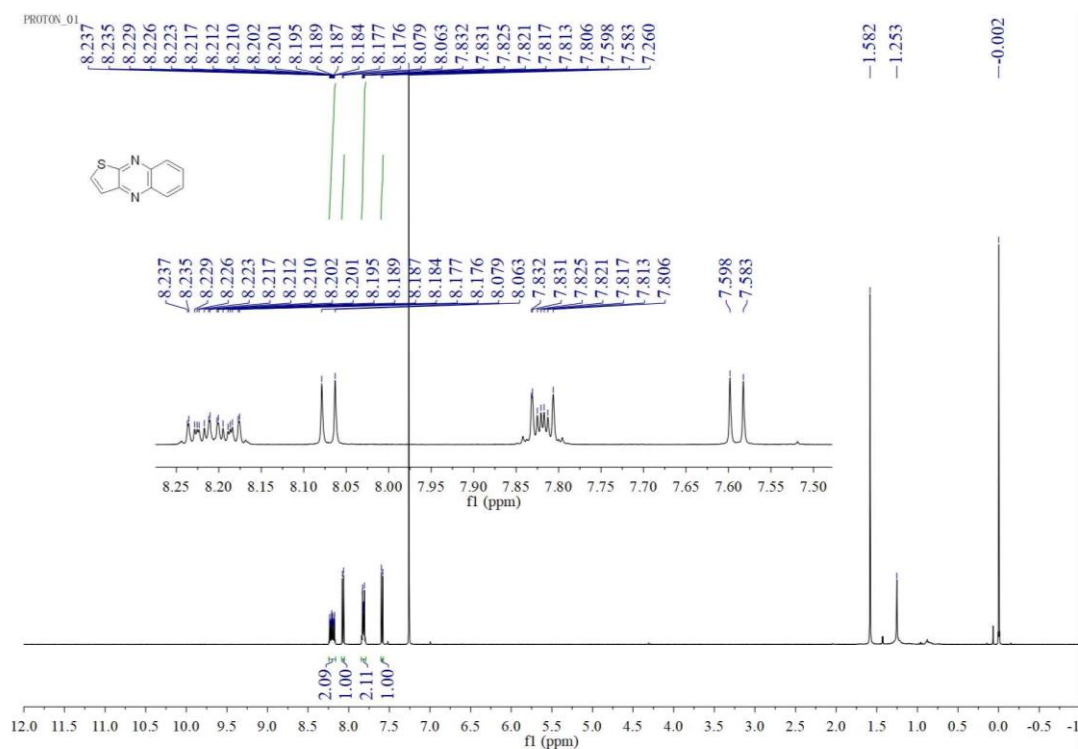

$^1\text{H}$  NMR spectrum of **5n** in  $\text{CDCl}_3$

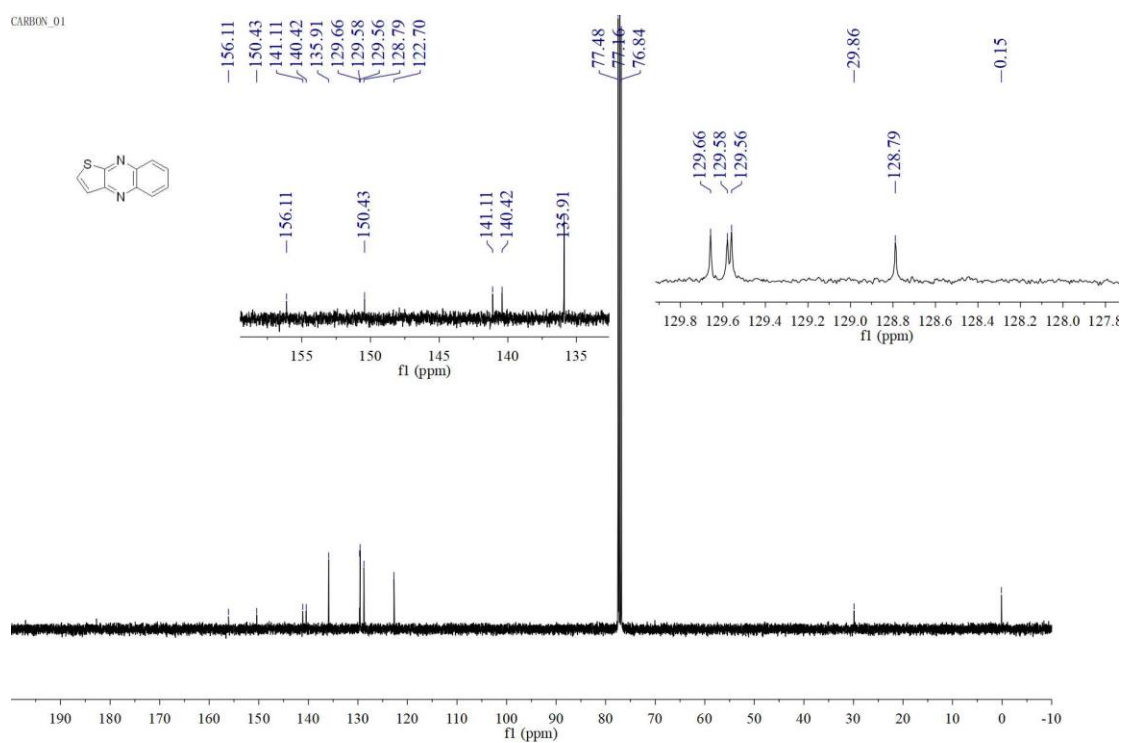

$^{13}\text{C}$  NMR spectrum of **5n** in  $\text{CDCl}_3$

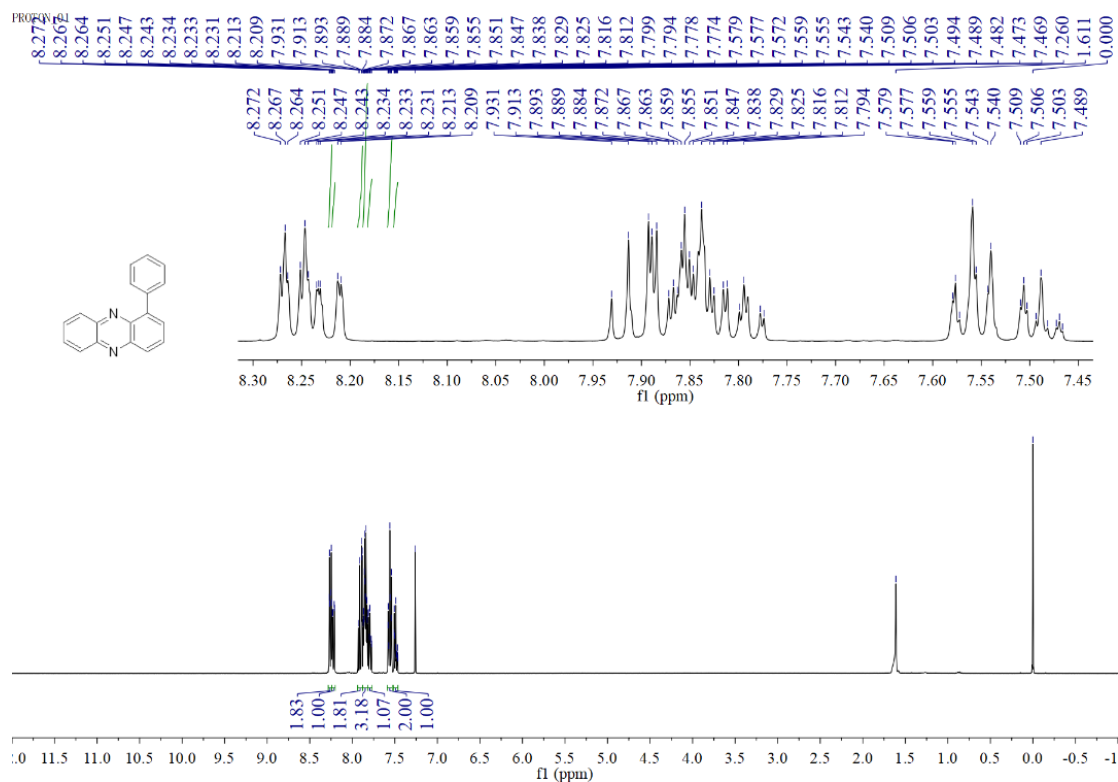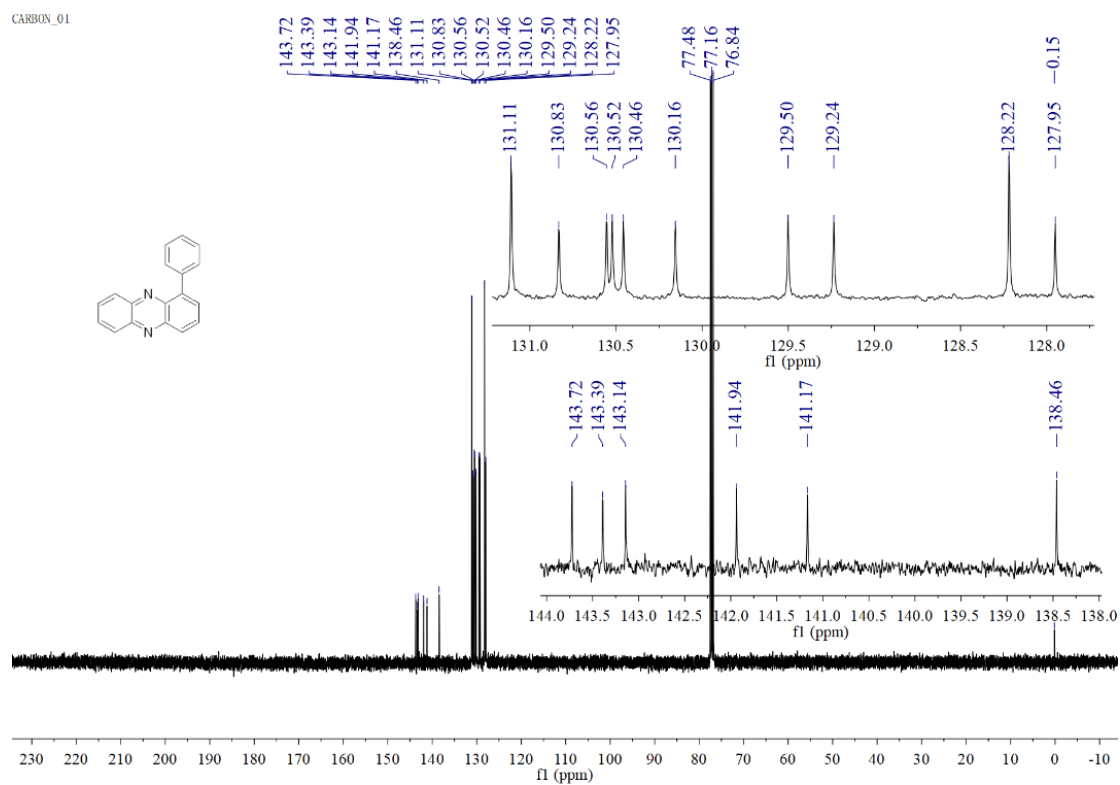

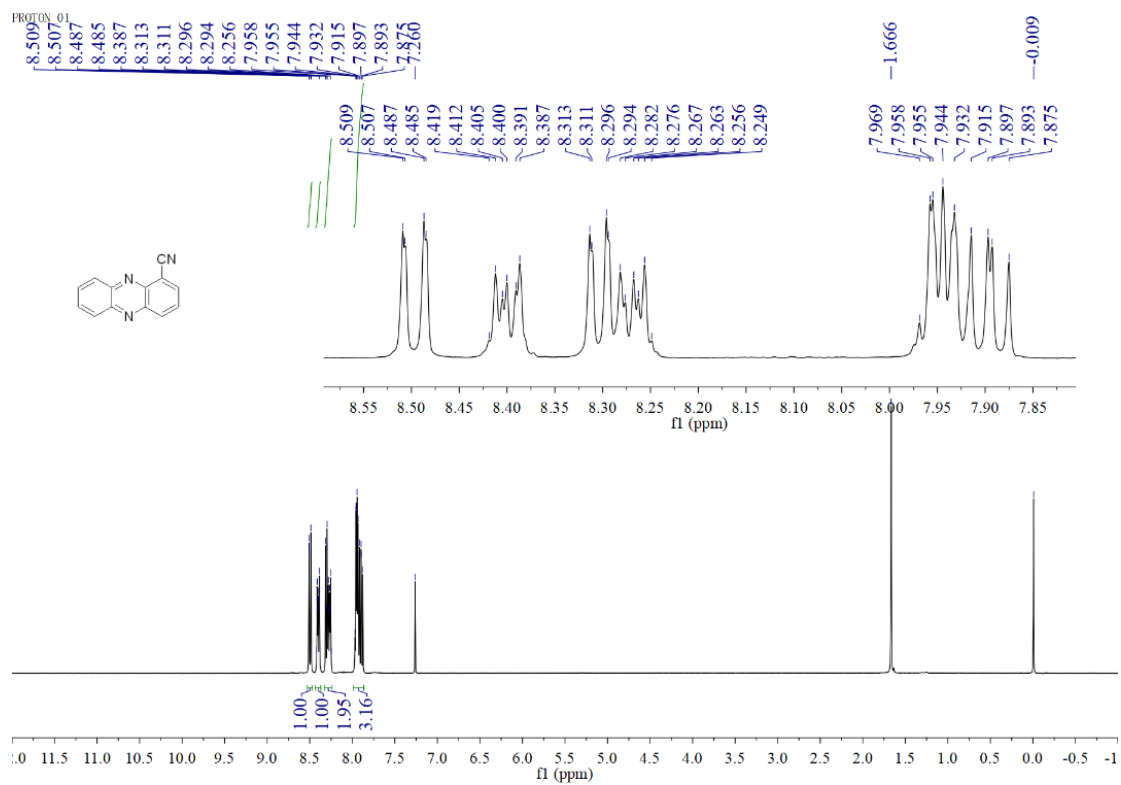

<sup>1</sup>H NMR spectrum of **6b** in CDCl<sub>3</sub>

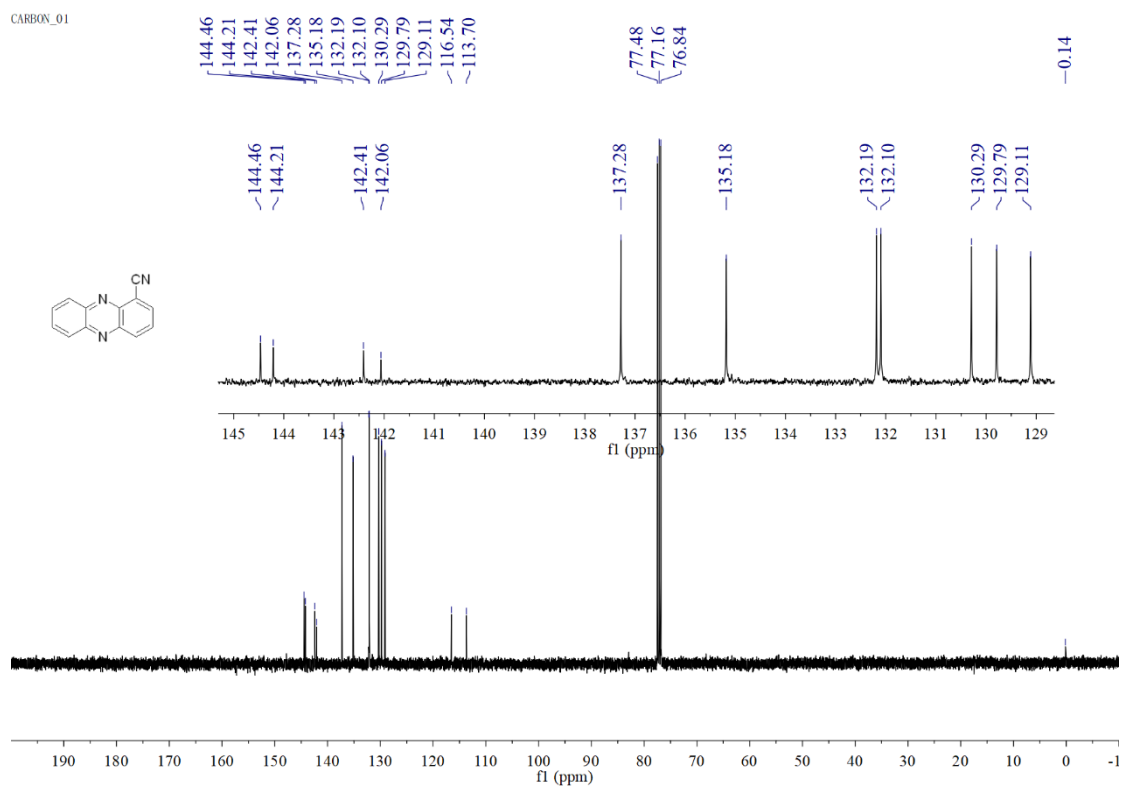

<sup>13</sup>C NMR spectrum of **6b** in CDCl<sub>3</sub>

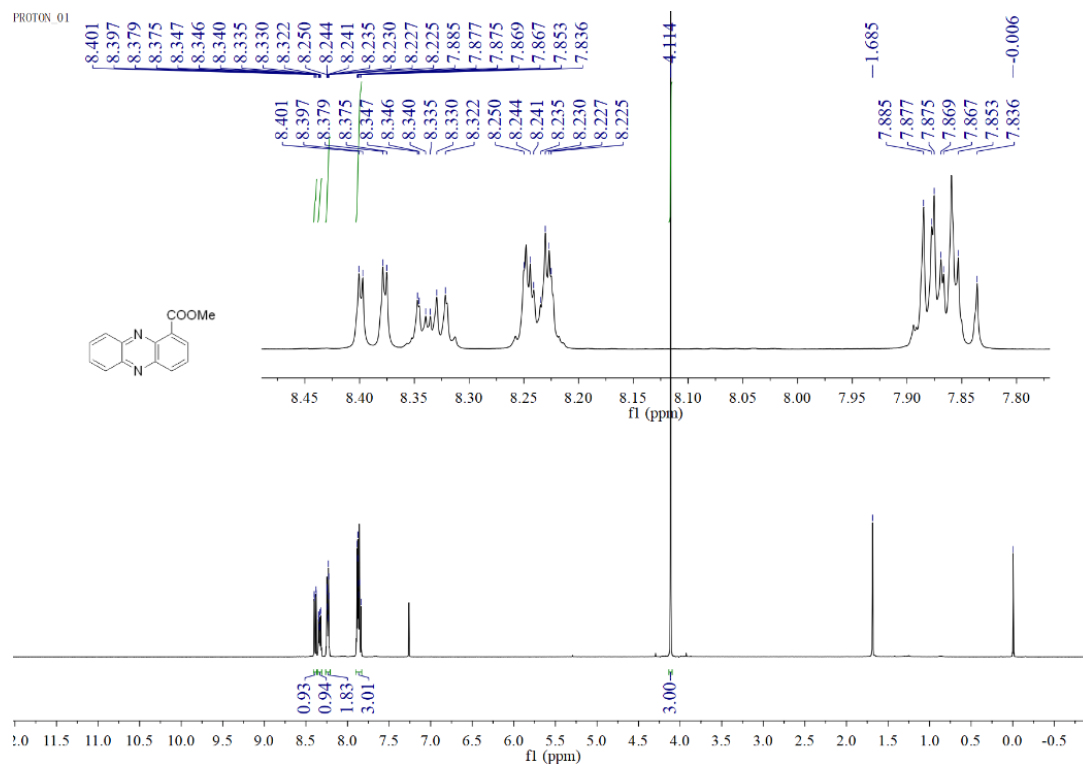

<sup>1</sup>H NMR spectrum of **6c** in CDCl<sub>3</sub>

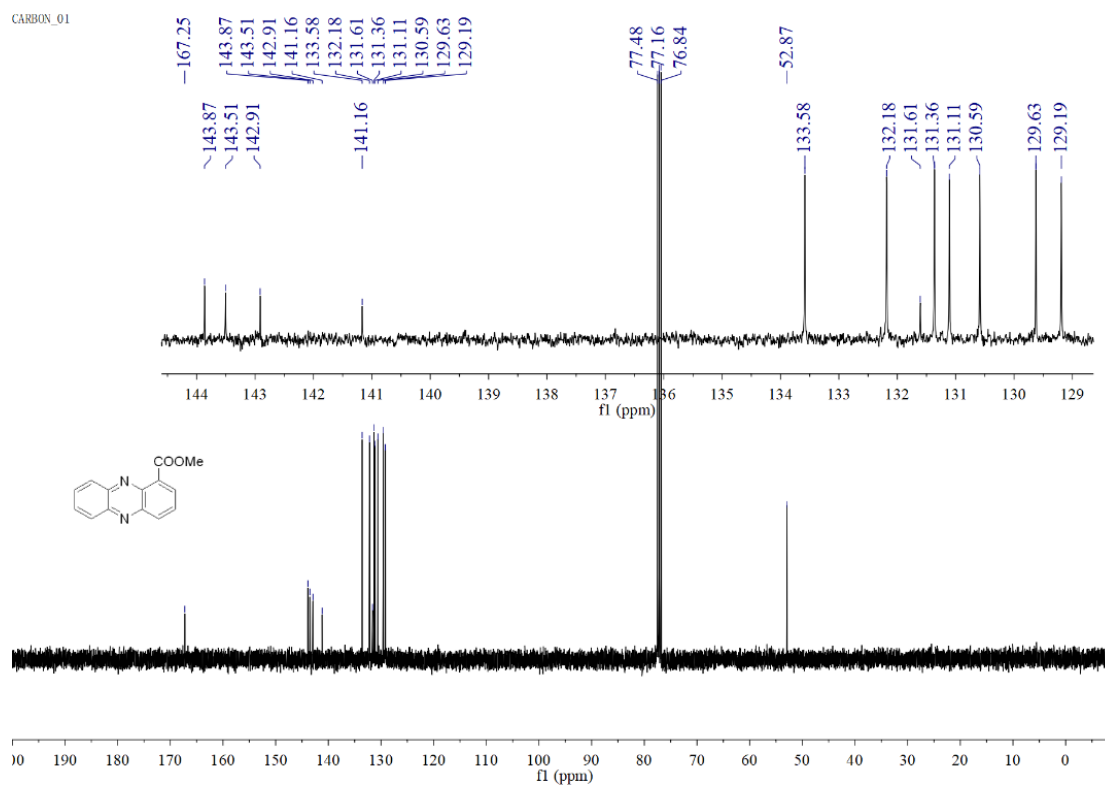

<sup>13</sup>C NMR spectrum of **6c** in CDCl<sub>3</sub>

PROTON\_01

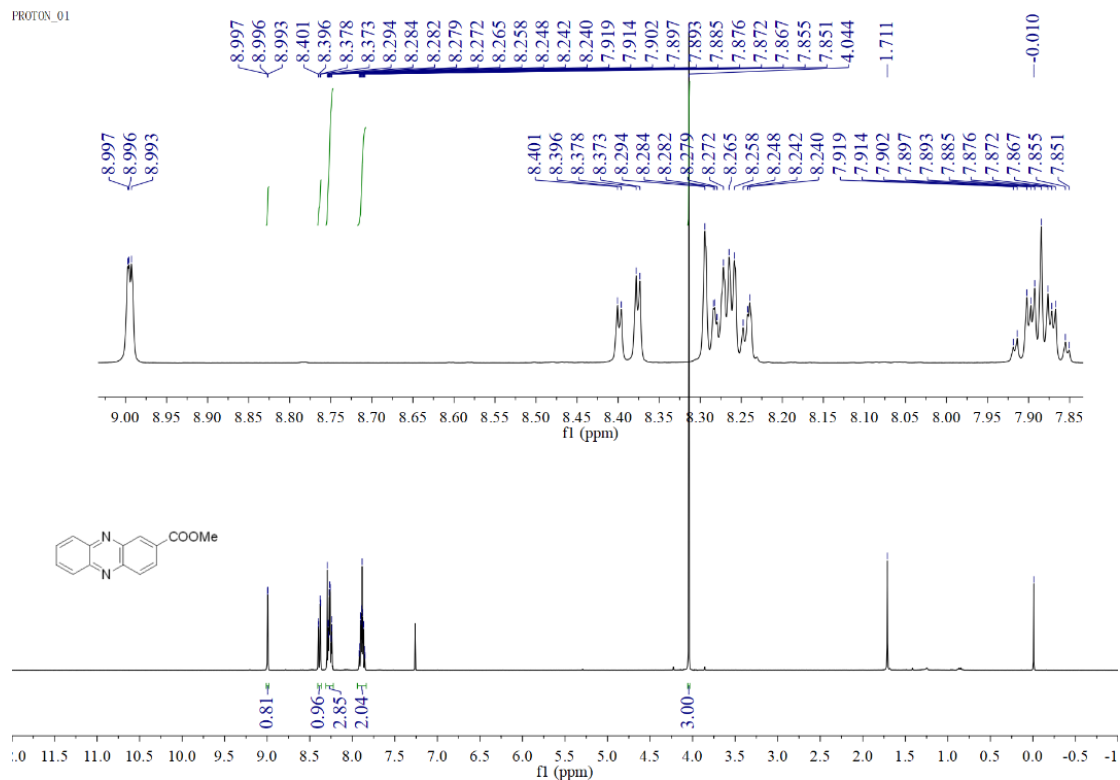

<sup>1</sup>H NMR spectrum of **7c** in CDCl<sub>3</sub>

CARBON\_01

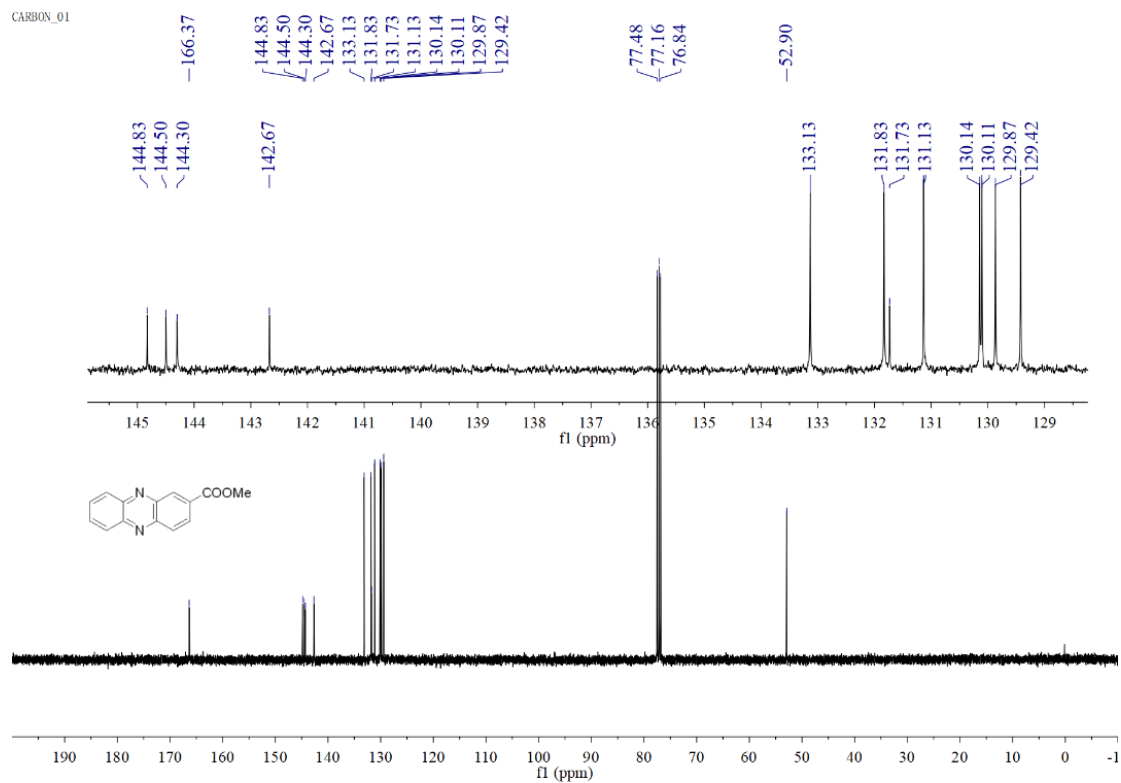

<sup>13</sup>C NMR spectrum of **7c** in CDCl<sub>3</sub>

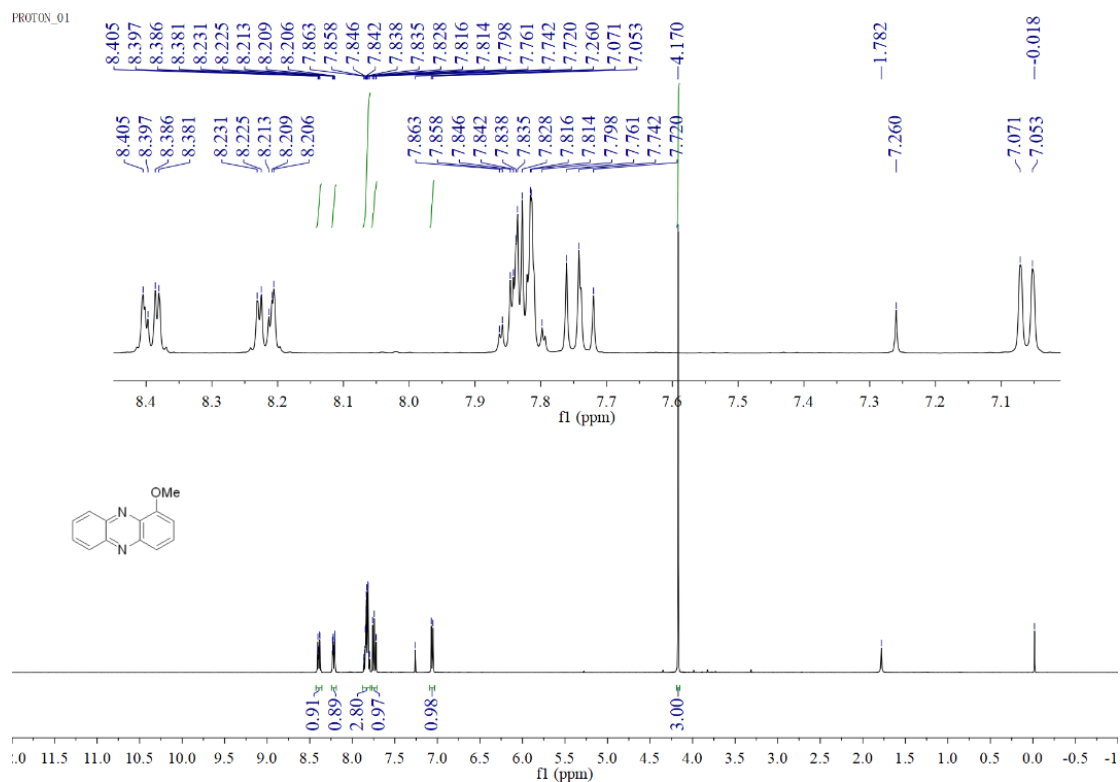

$^1\text{H}$  NMR spectrum of **6d** in  $\text{CDCl}_3$

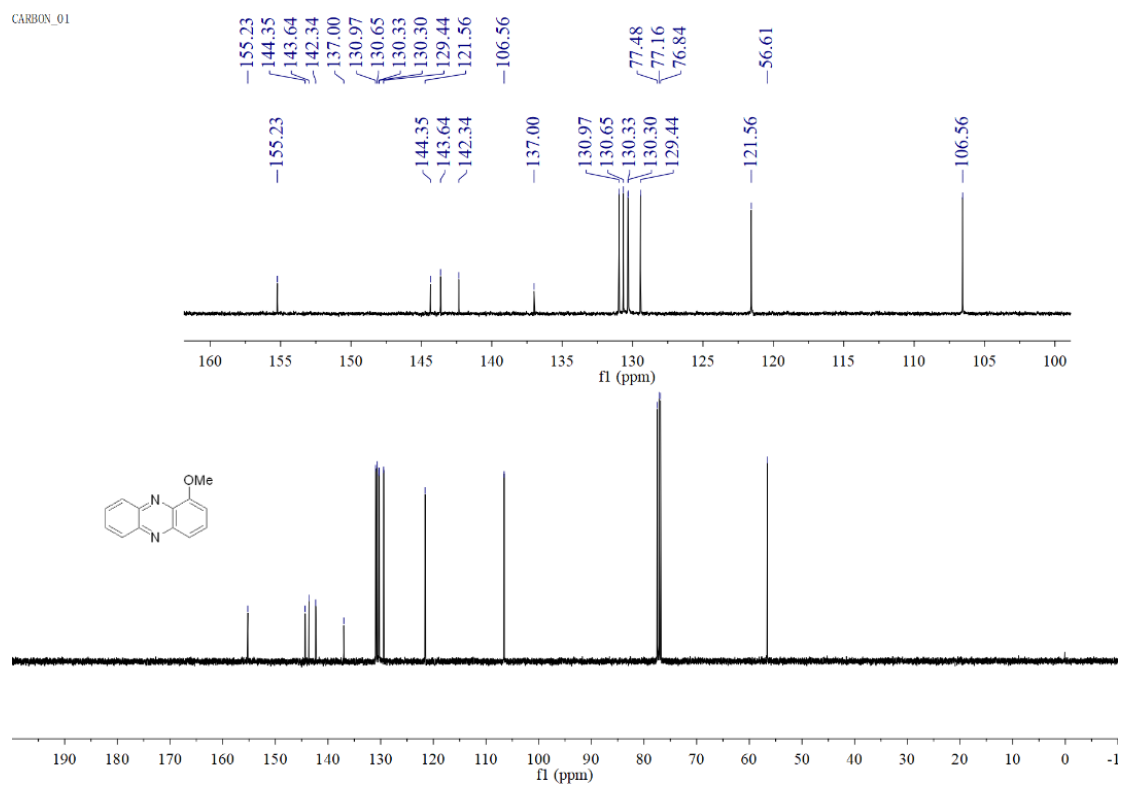

$^{13}\text{C}$  NMR spectrum of **6d** in  $\text{CDCl}_3$

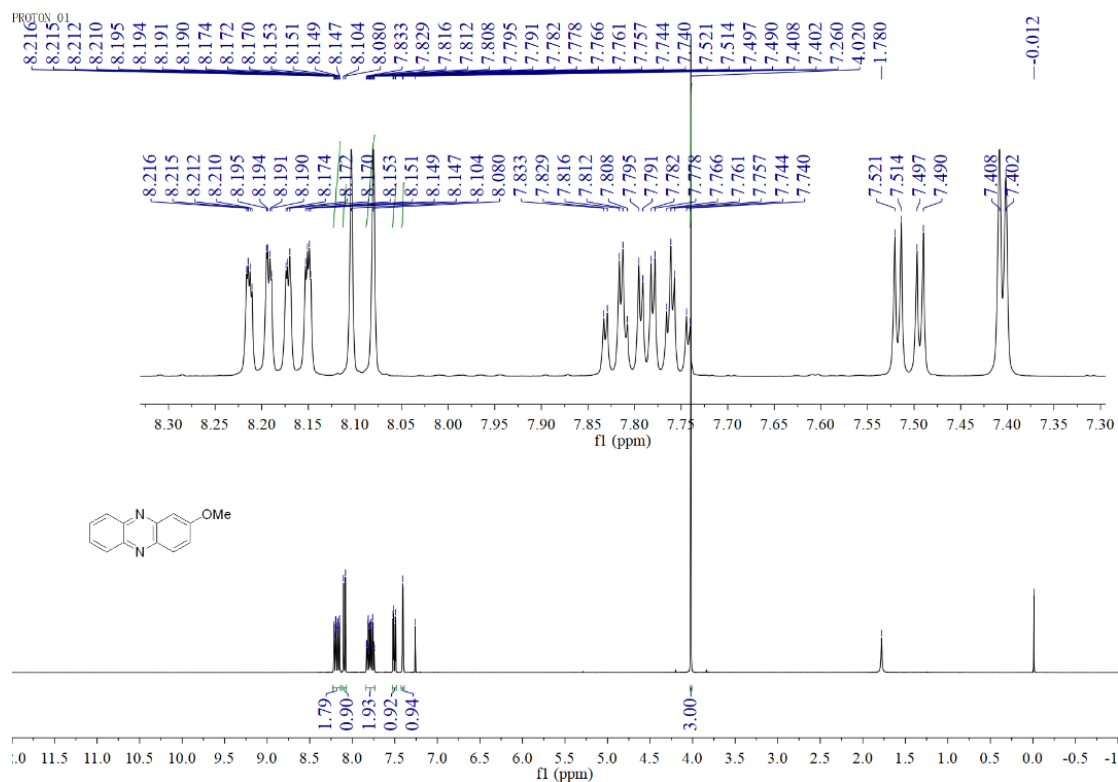

<sup>1</sup>H NMR spectrum of **7d** in CDCl<sub>3</sub>

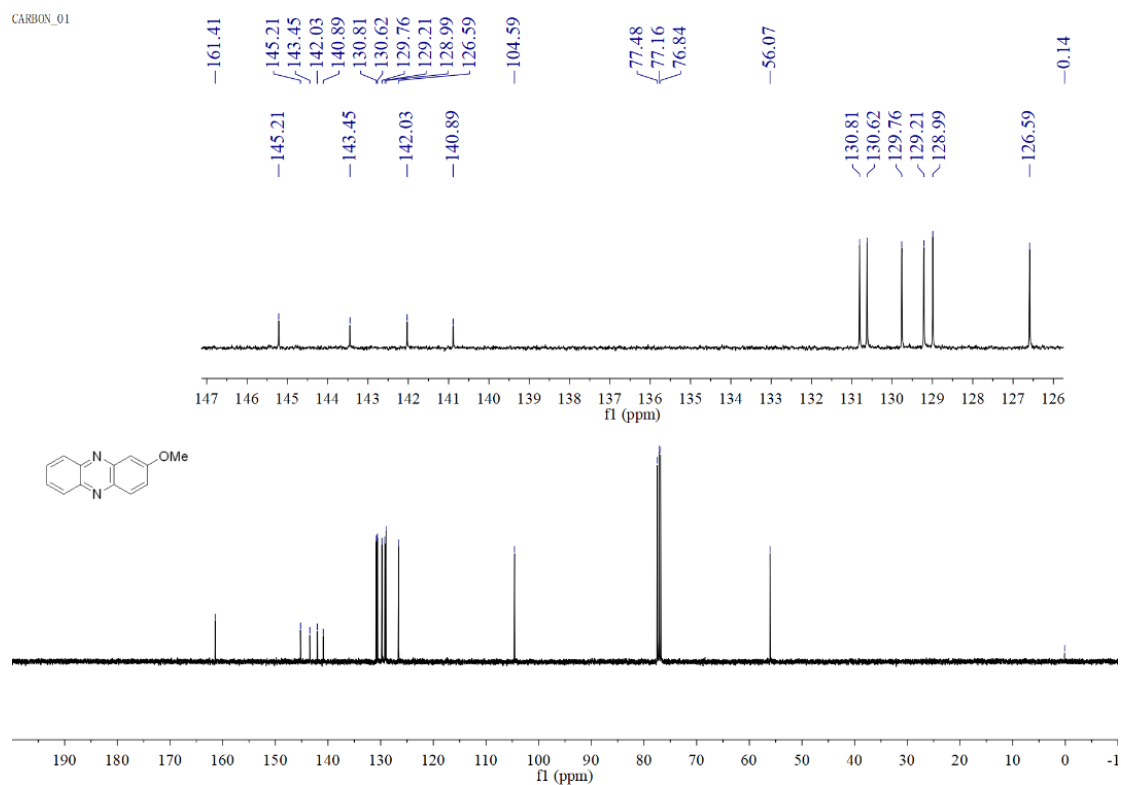

<sup>13</sup>C NMR spectrum of **7d** in CDCl<sub>3</sub>

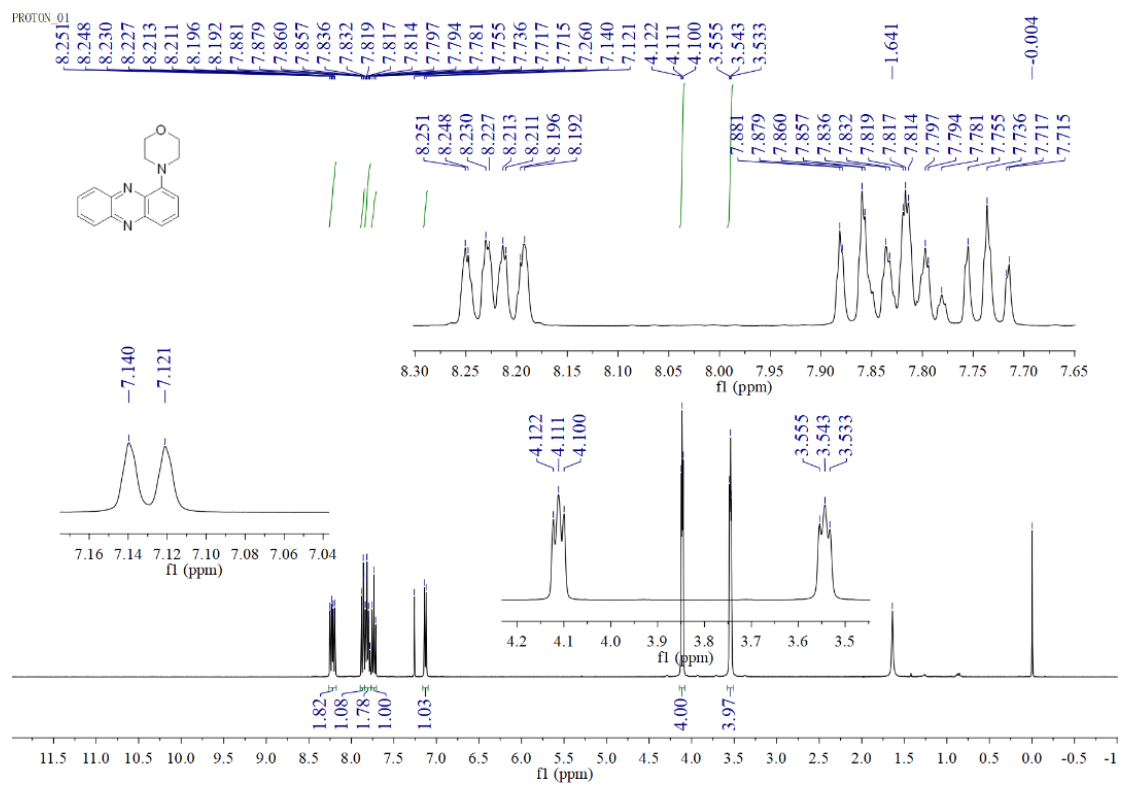

<sup>1</sup>H NMR spectrum of **6e** in CDCl<sub>3</sub>

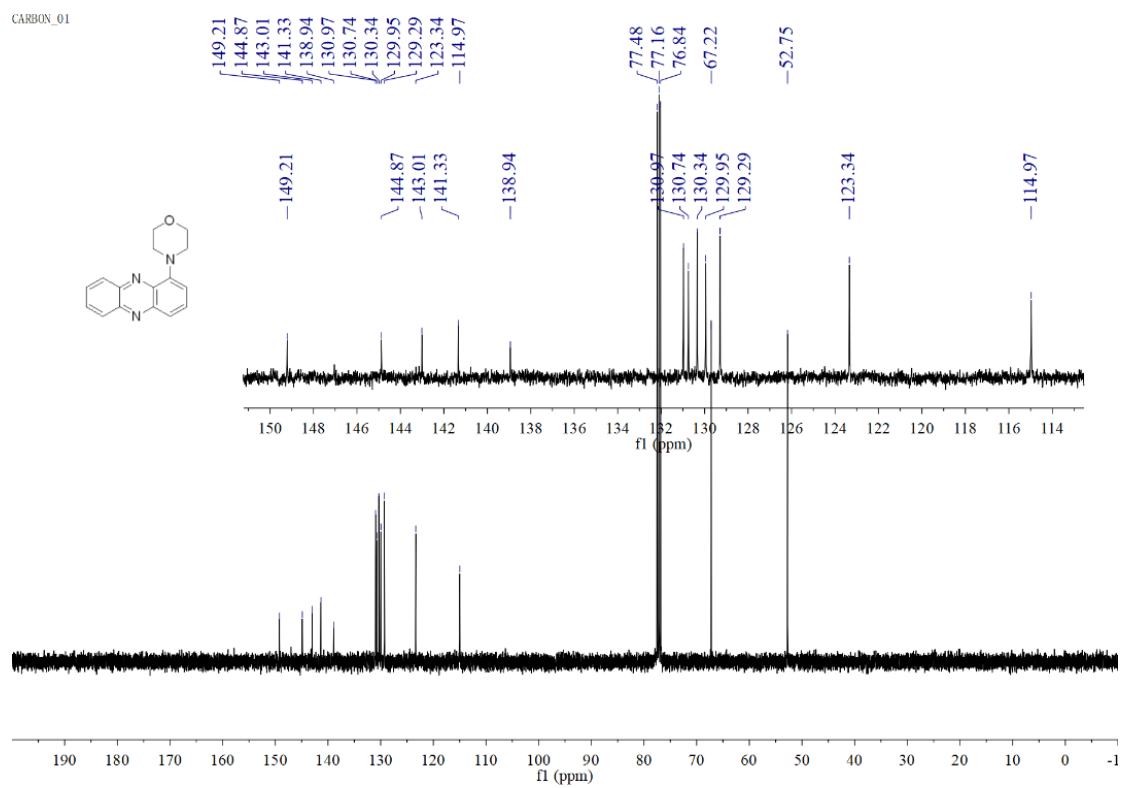

<sup>13</sup>C NMR spectrum of **6e** in CDCl<sub>3</sub>



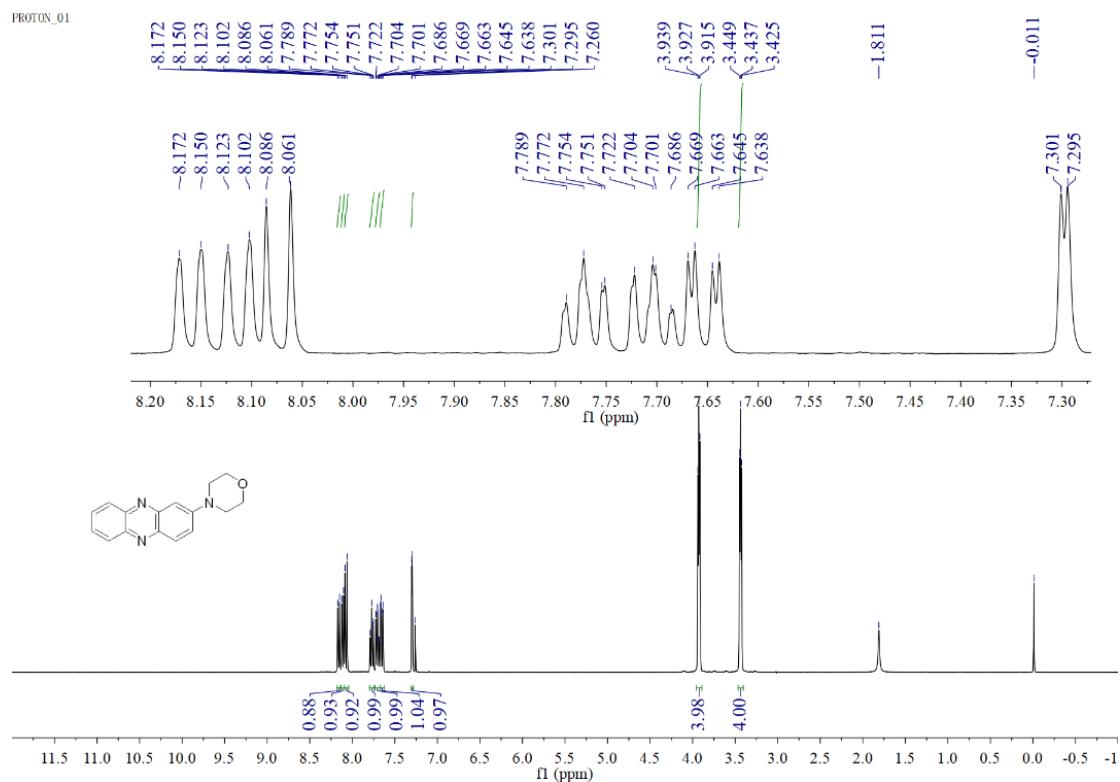

<sup>1</sup>H NMR spectrum of **7e** in CDCl<sub>3</sub>

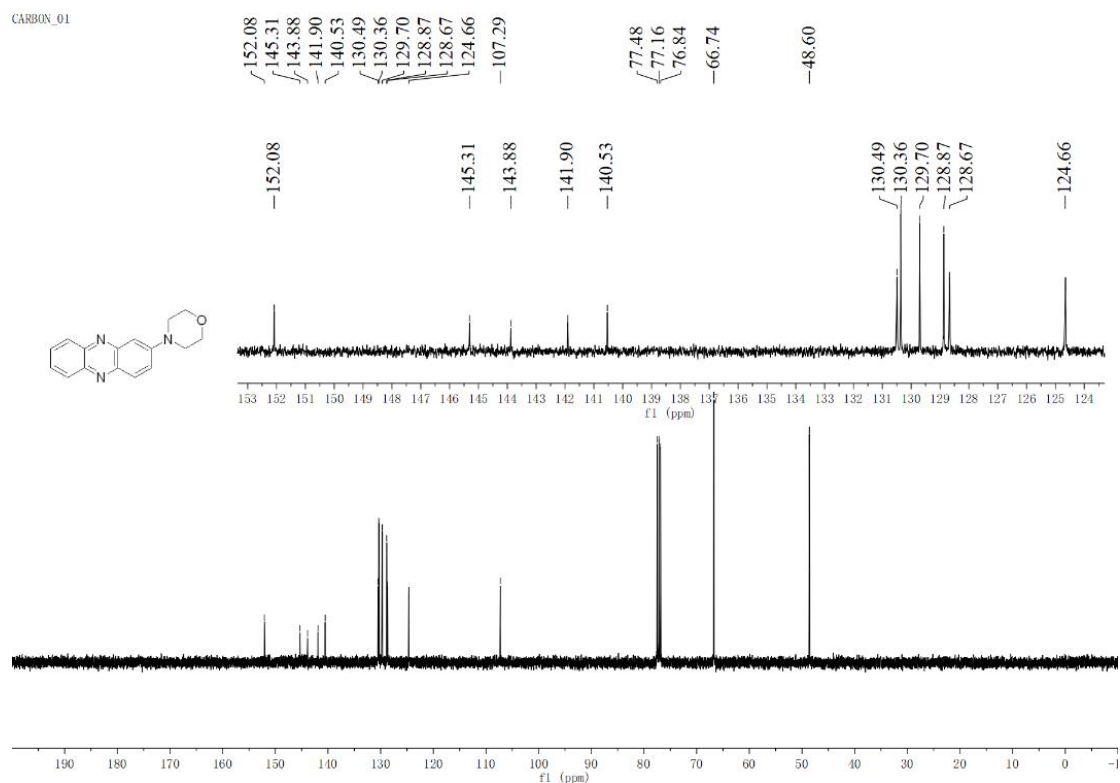

<sup>13</sup>C NMR spectrum of **7e** in CDCl<sub>3</sub>

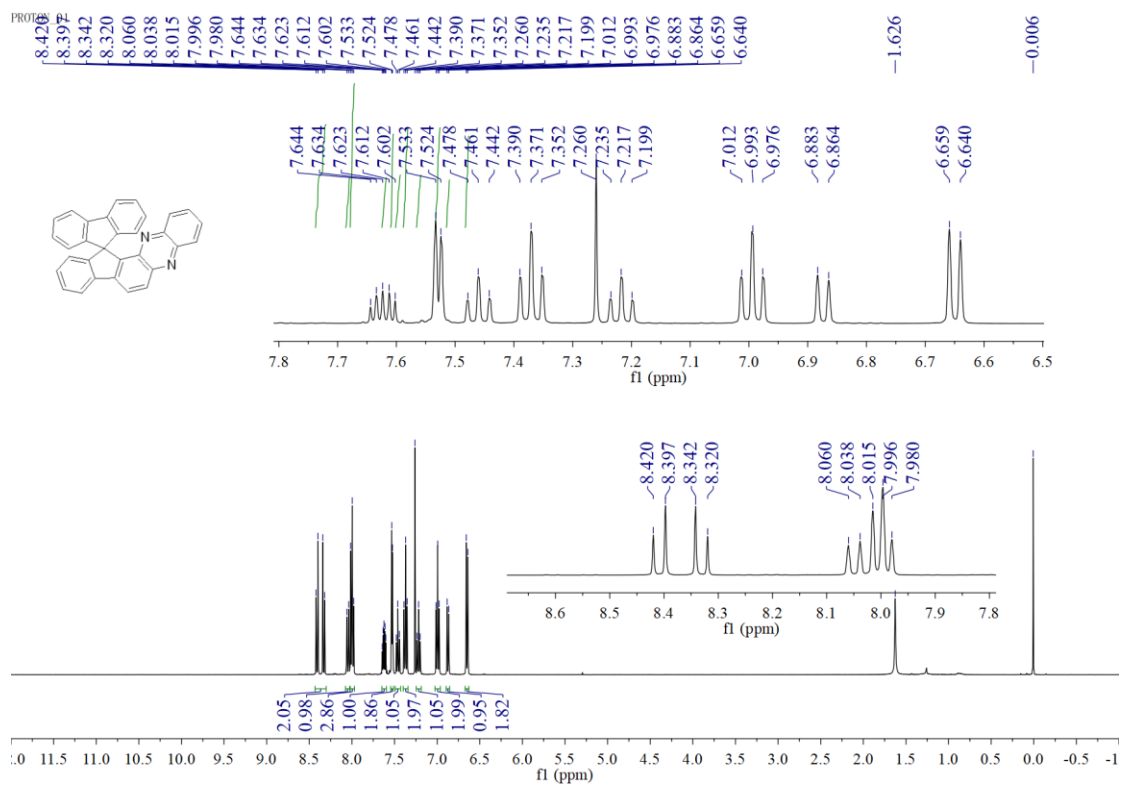

<sup>1</sup>H NMR spectrum of **6f** in CDCl<sub>3</sub>

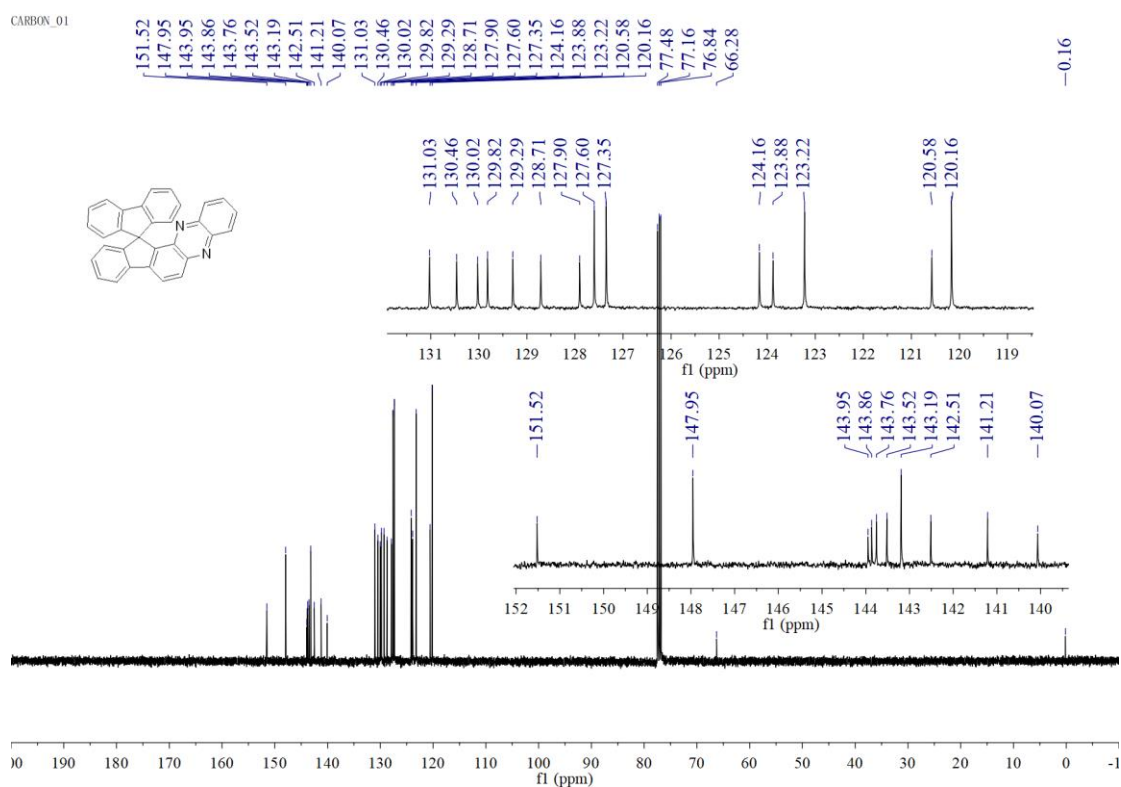

<sup>13</sup>C NMR spectrum of **6f** in CDCl<sub>3</sub>

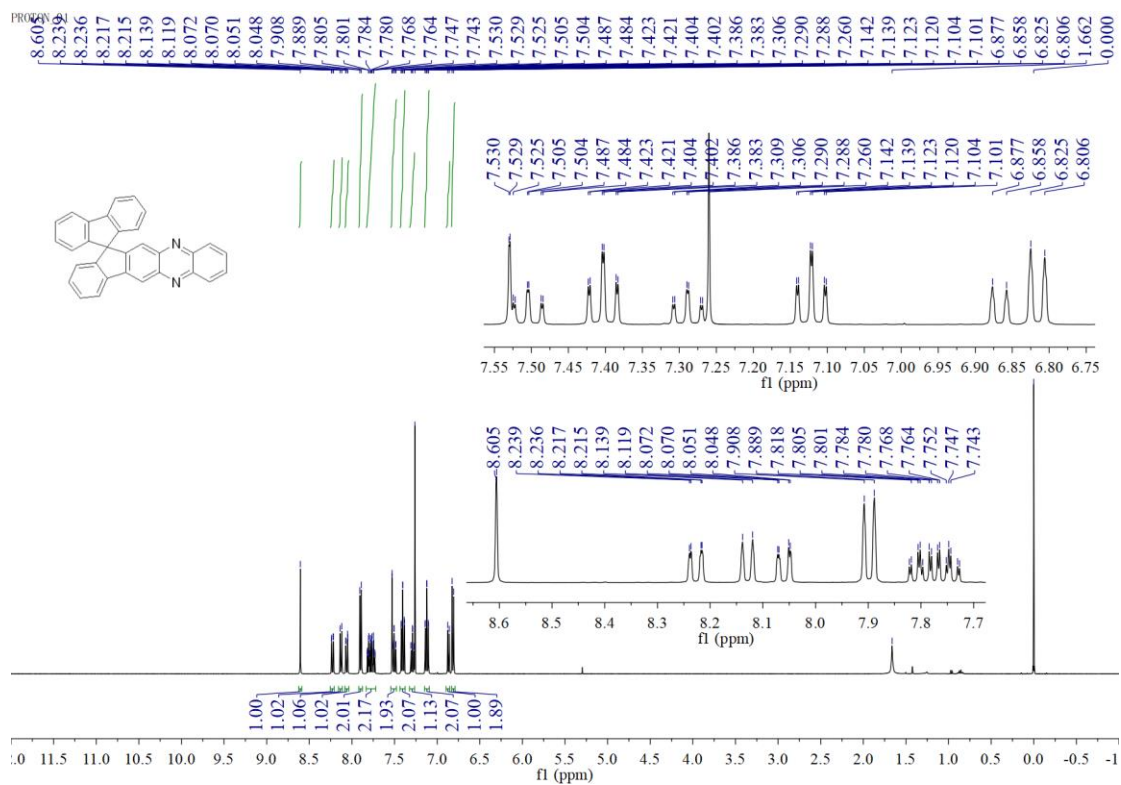

<sup>1</sup>H NMR spectrum of **7f** in CDCl<sub>3</sub>

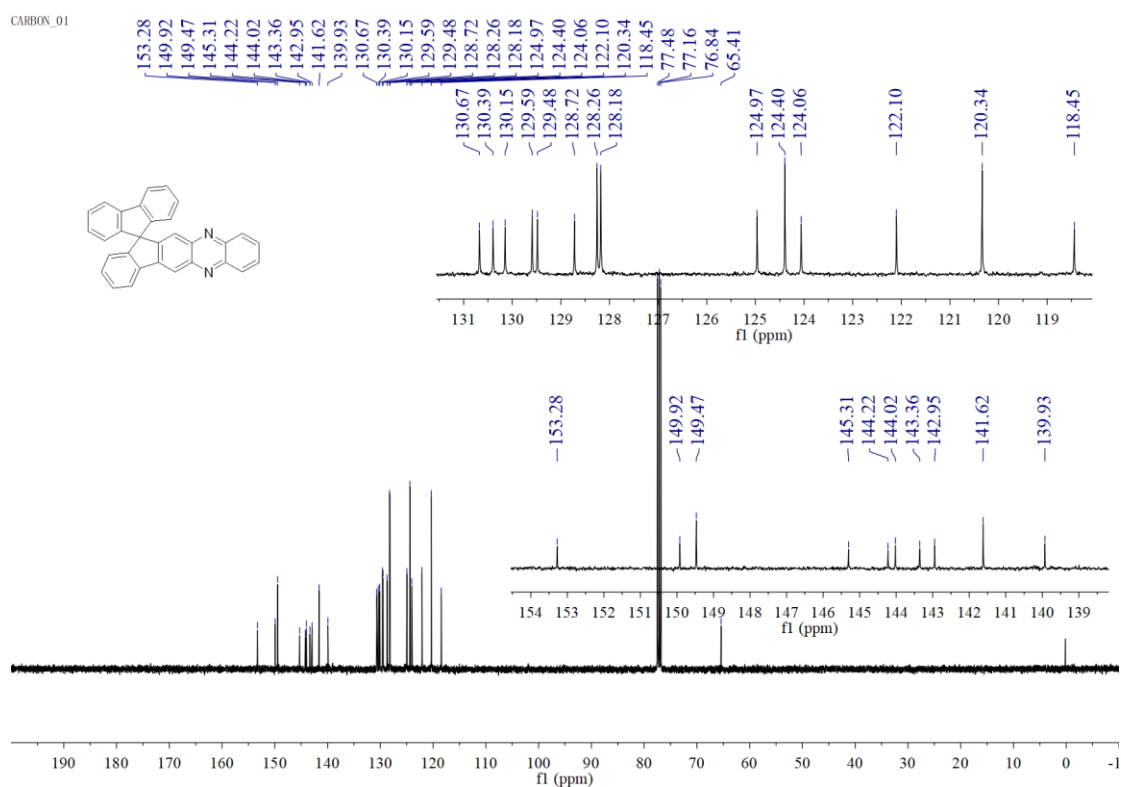

<sup>13</sup>C NMR spectrum of **7f** in CDCl<sub>3</sub>

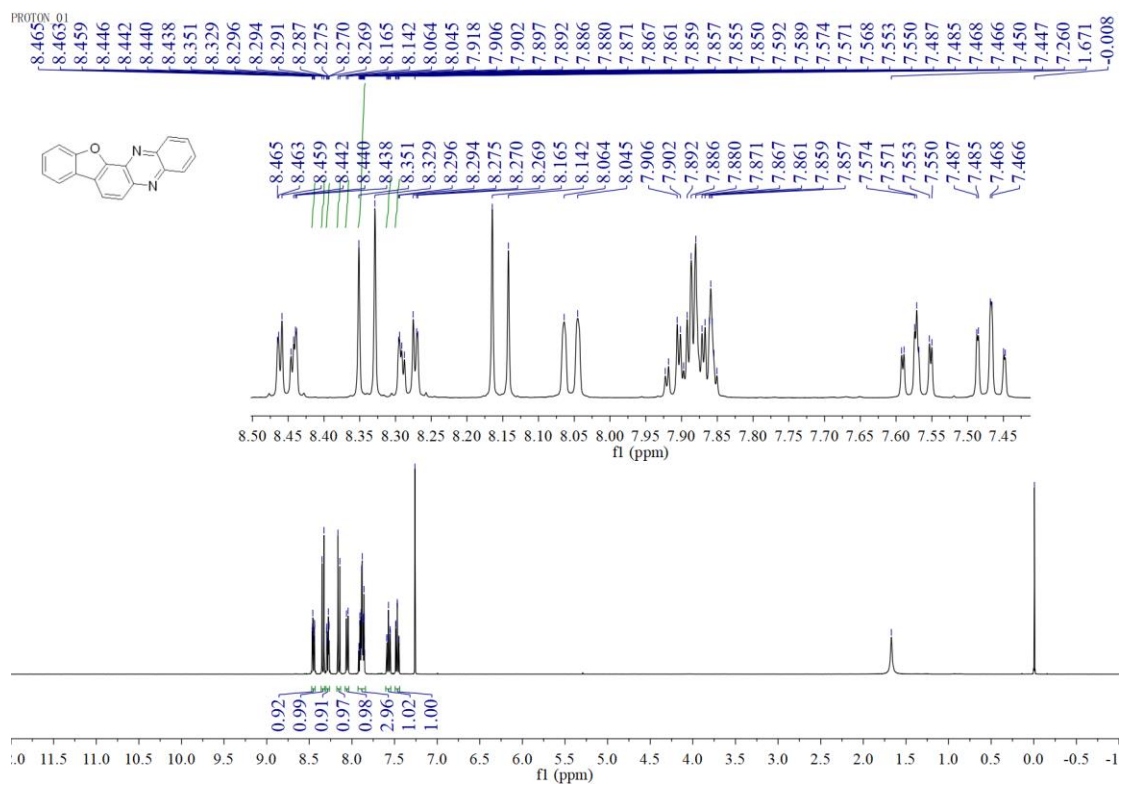

<sup>1</sup>H NMR spectrum of **6g** in CDCl<sub>3</sub>

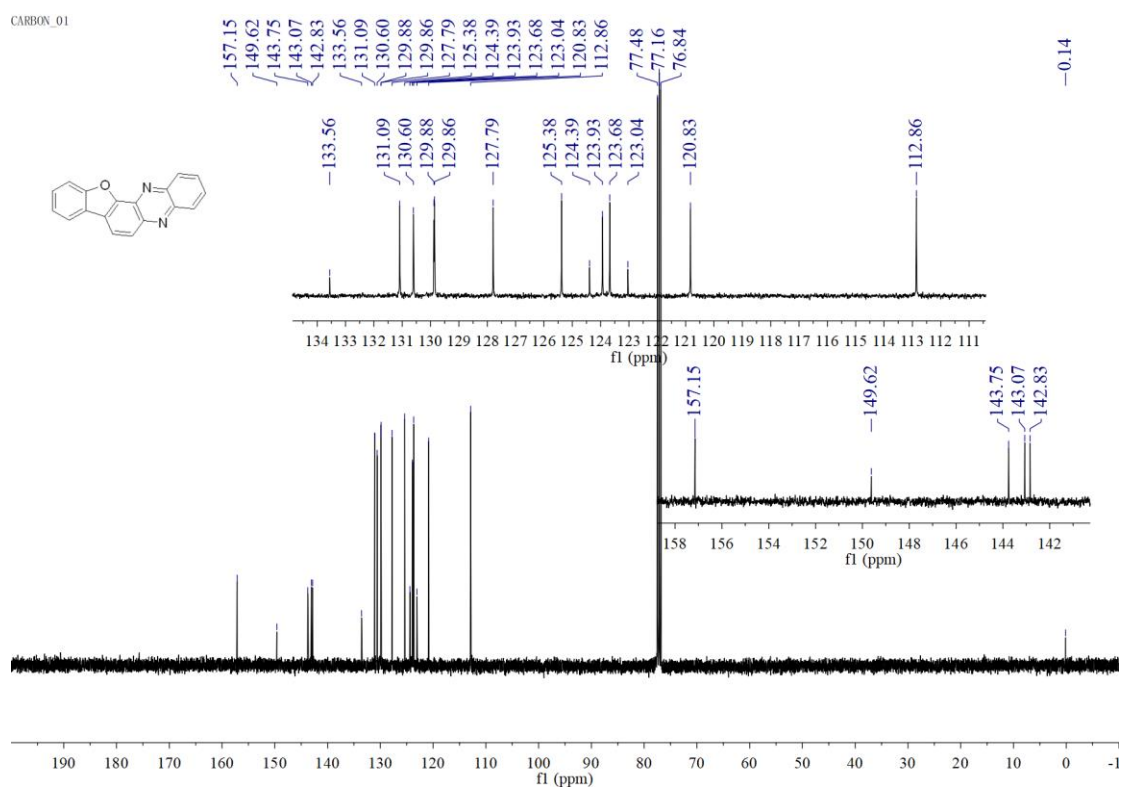

<sup>13</sup>C NMR spectrum of **6g** in CDCl<sub>3</sub>

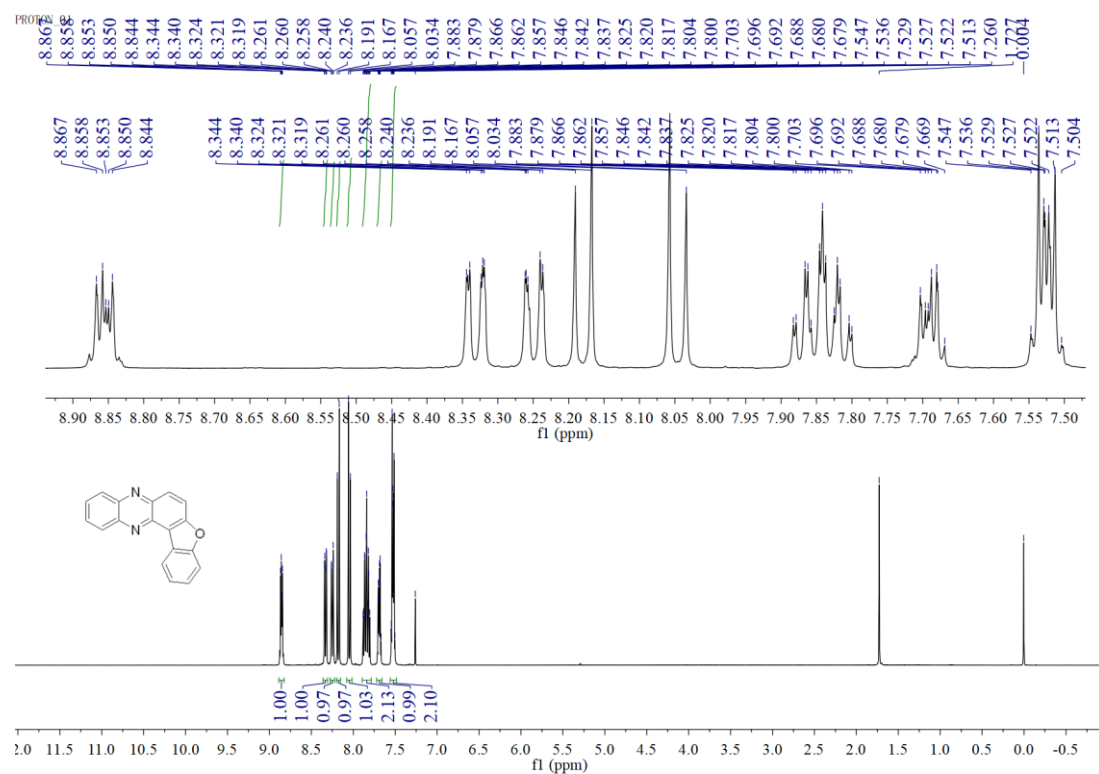<sup>1</sup>H NMR spectrum of **6h** in CDCl<sub>3</sub>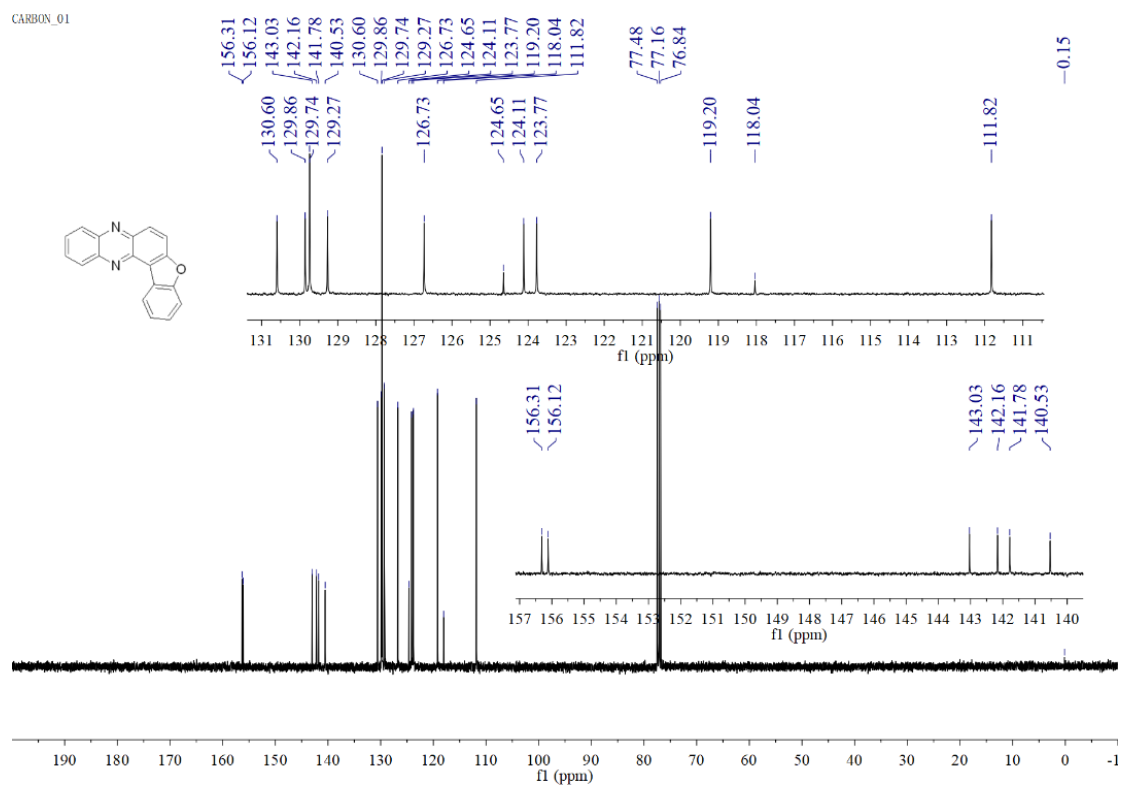 $^{13}\text{C}$  NMR spectrum of **6h** in  $\text{CDCl}_3$

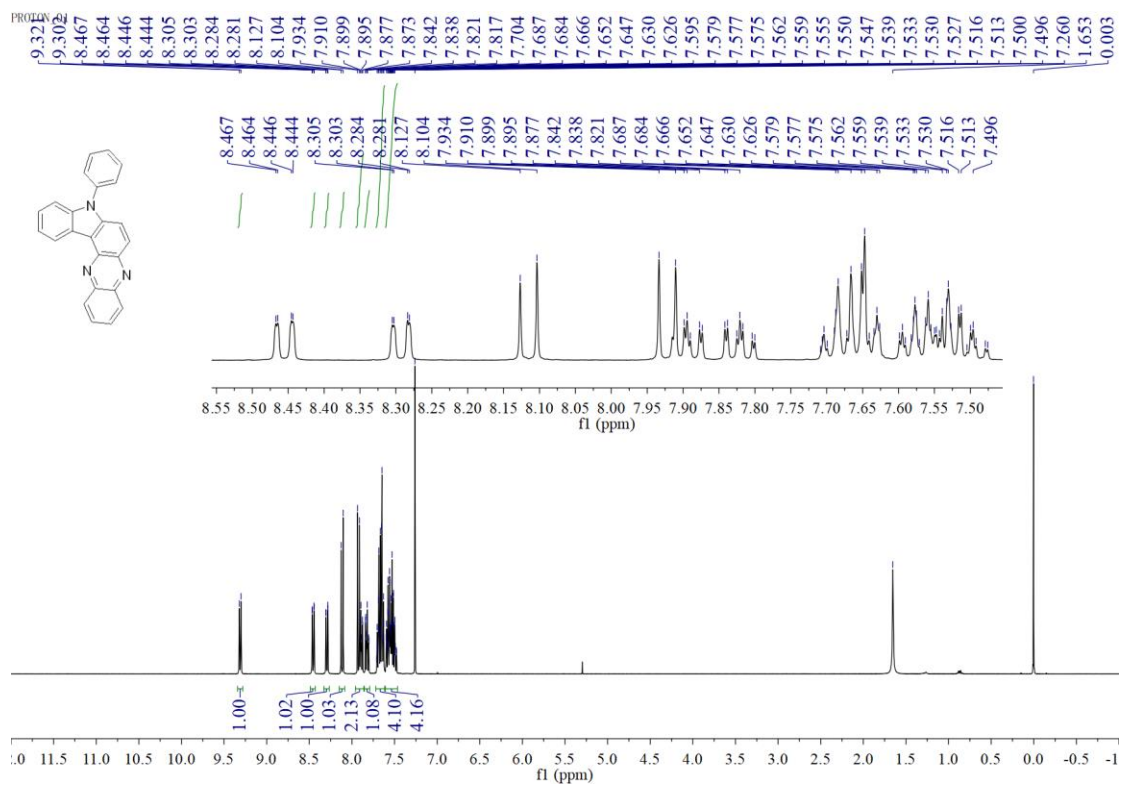

<sup>1</sup>H NMR spectrum of **6i** in CDCl<sub>3</sub>

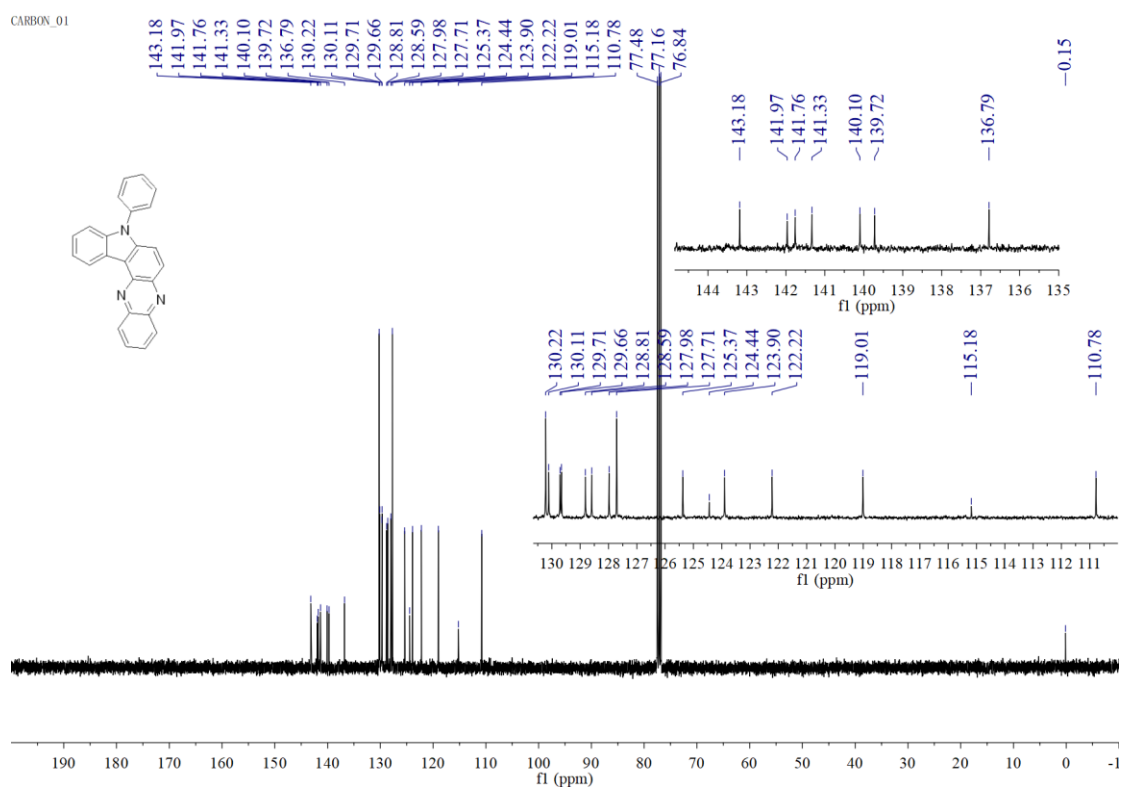

<sup>13</sup>C NMR spectrum of **6i** in CDCl<sub>3</sub>



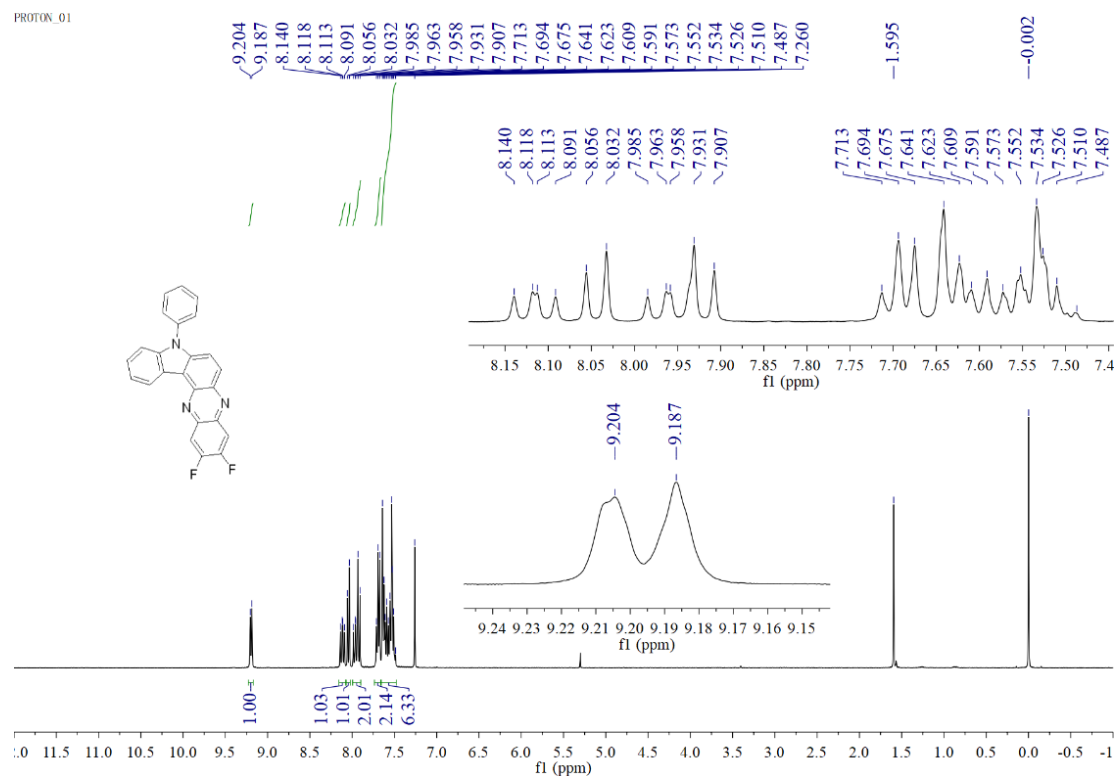

<sup>1</sup>H NMR spectrum of **6j** in CDCl<sub>3</sub>

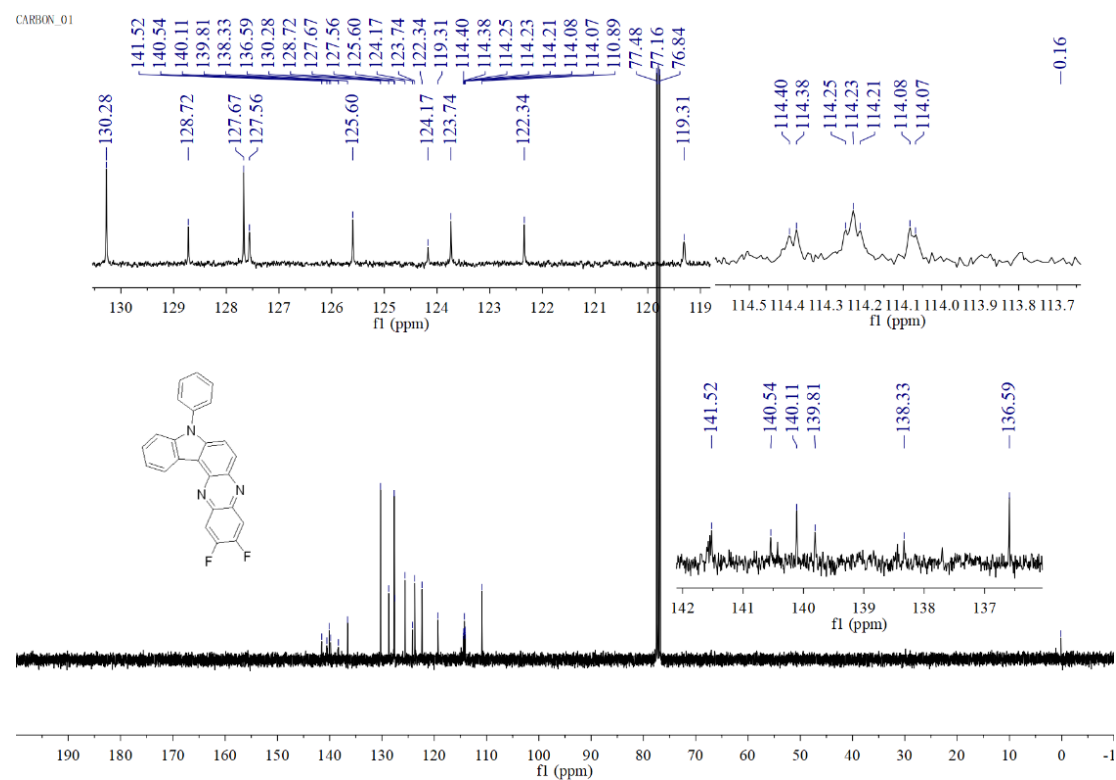

<sup>13</sup>C NMR spectrum of **6j** in CDCl<sub>3</sub>

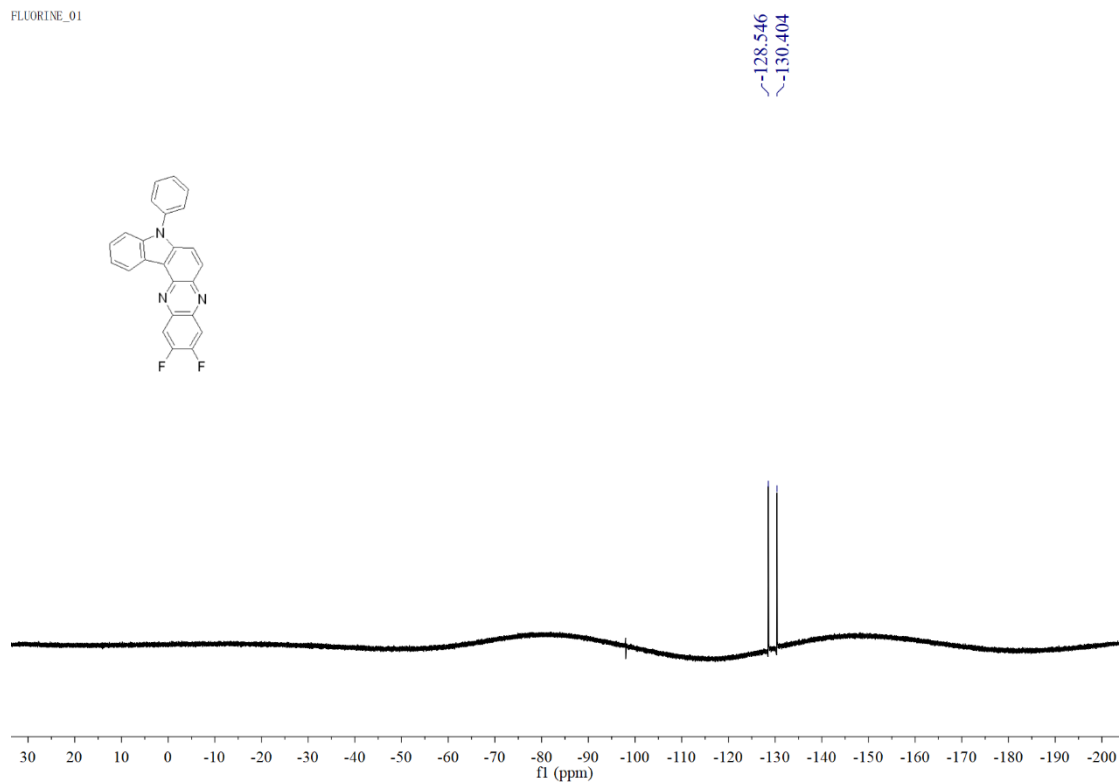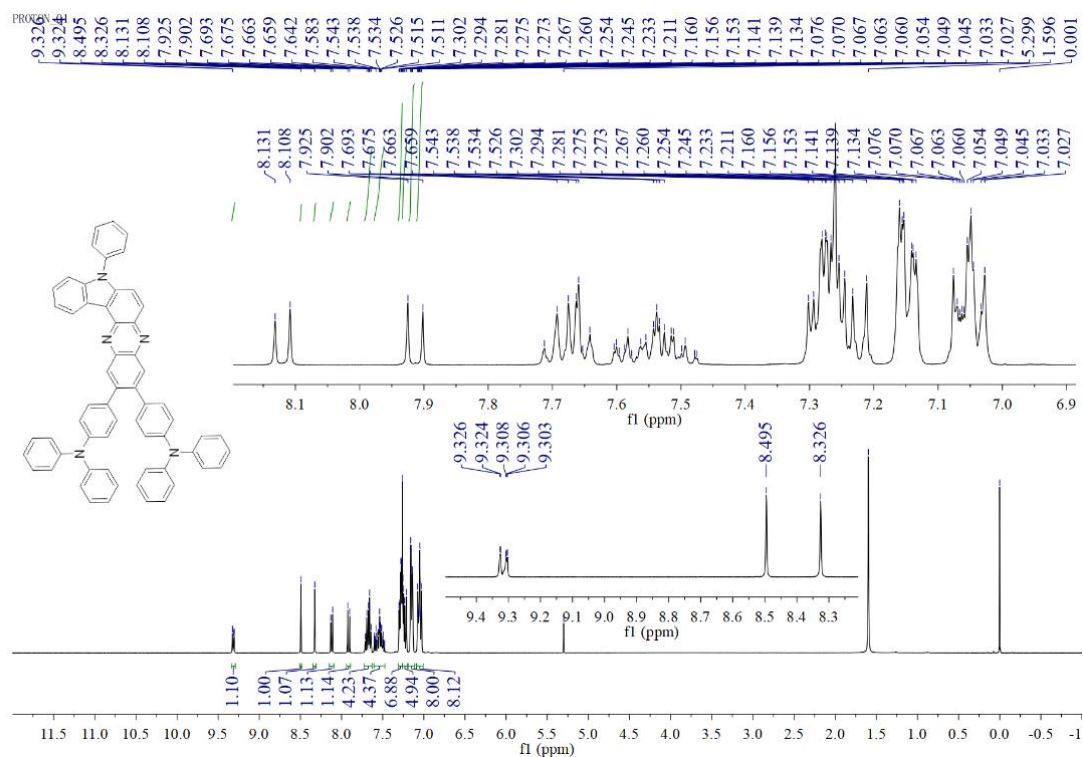





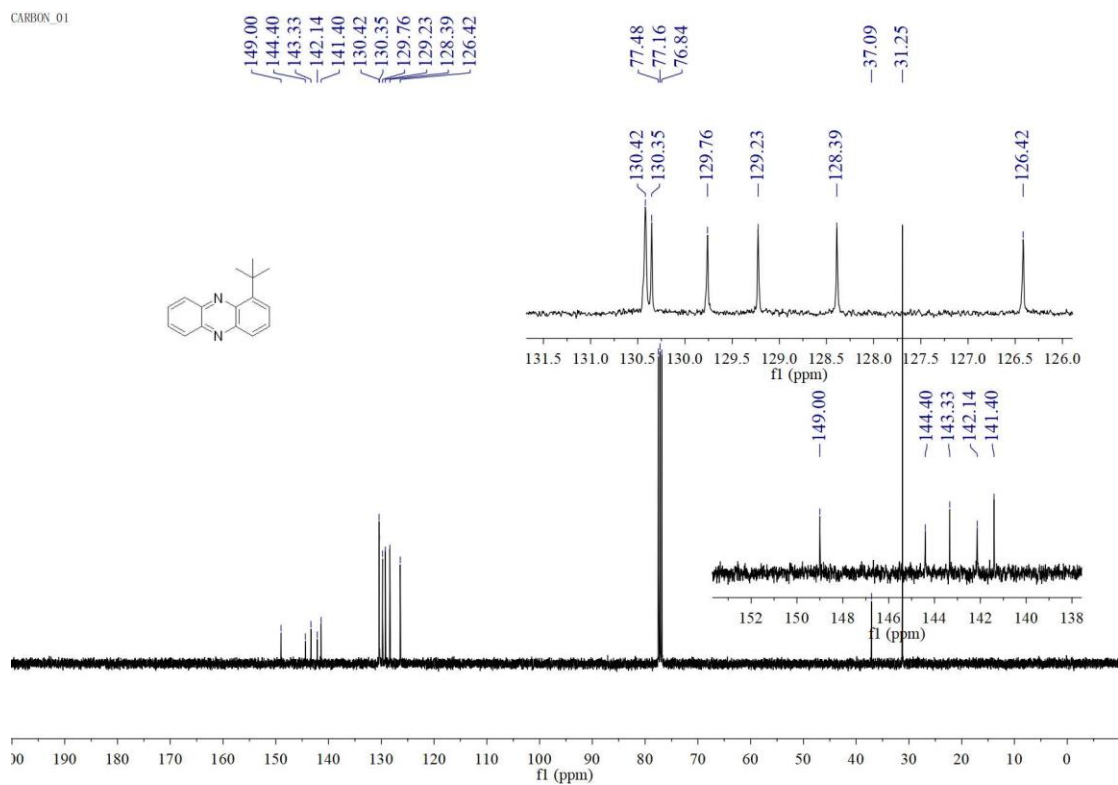

<sup>13</sup>C NMR spectrum of **6I** in CDCl<sub>3</sub>

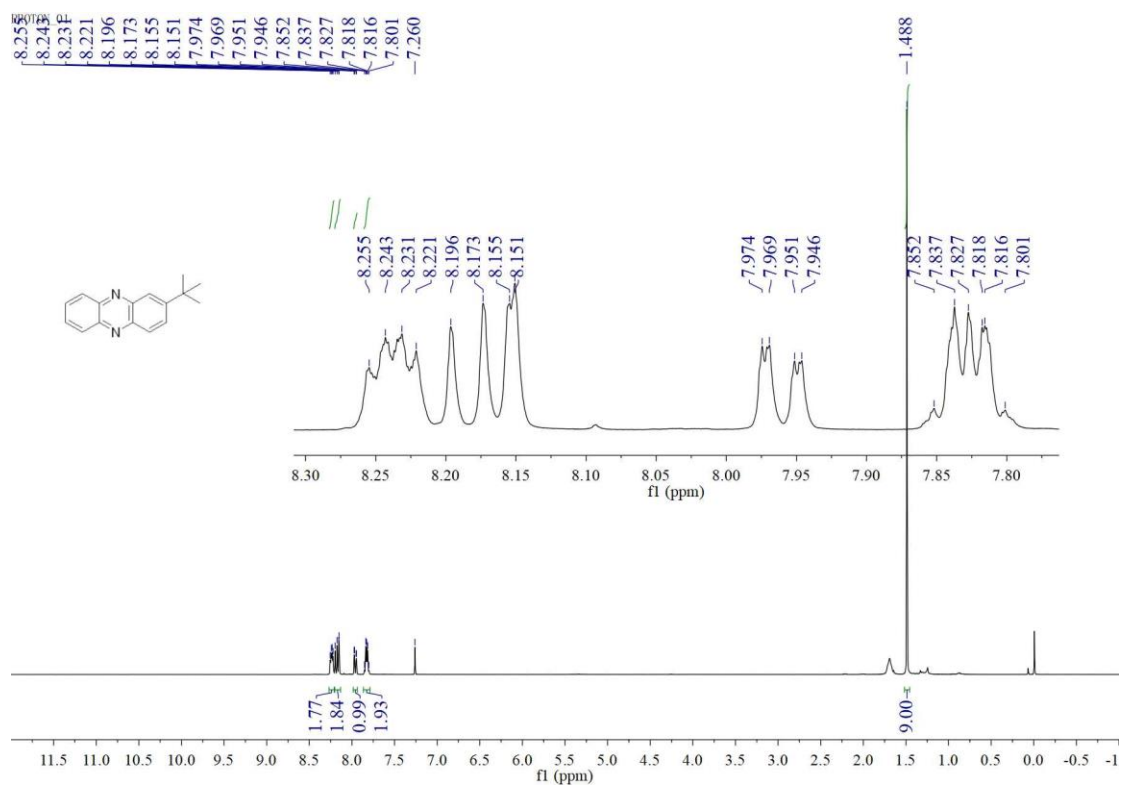

<sup>1</sup>H NMR spectrum of **7I** in CDCl<sub>3</sub>

CARBON\_01

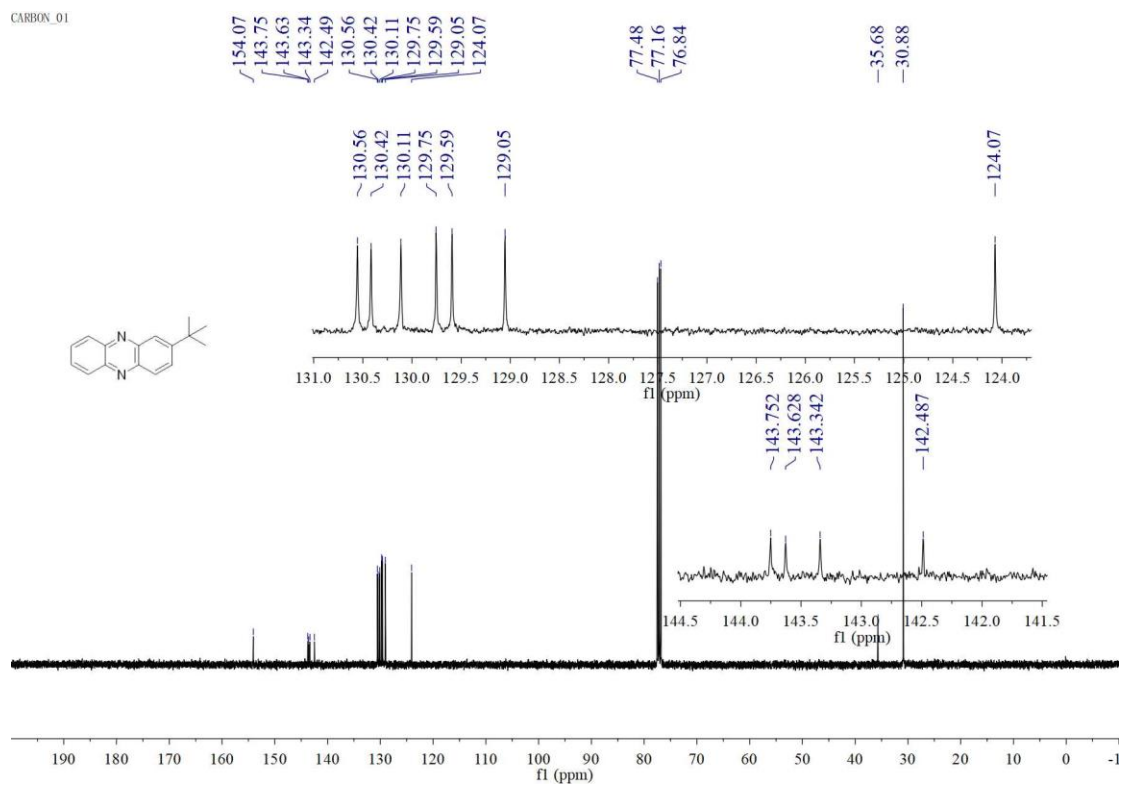<sup>13</sup>C NMR spectrum of **7l** in CDCl<sub>3</sub>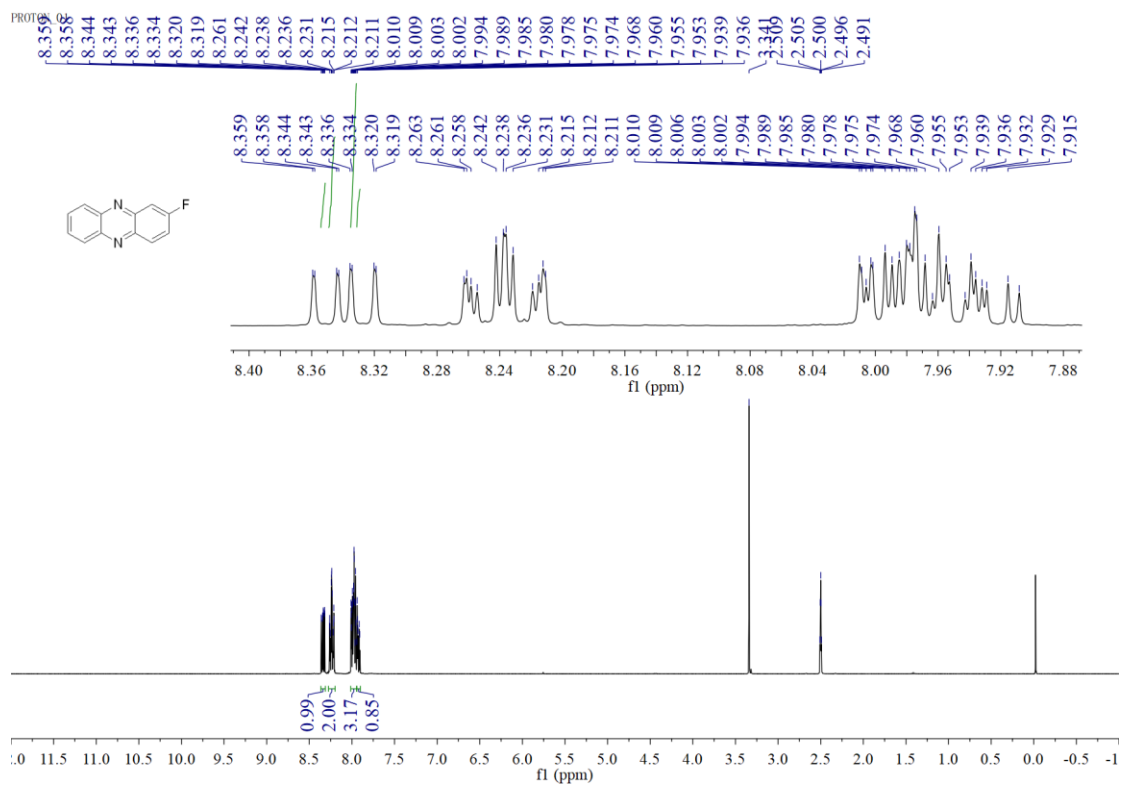<sup>1</sup>H NMR spectrum of **6m** in DMSO-*d*<sub>6</sub>

CARBON\_01

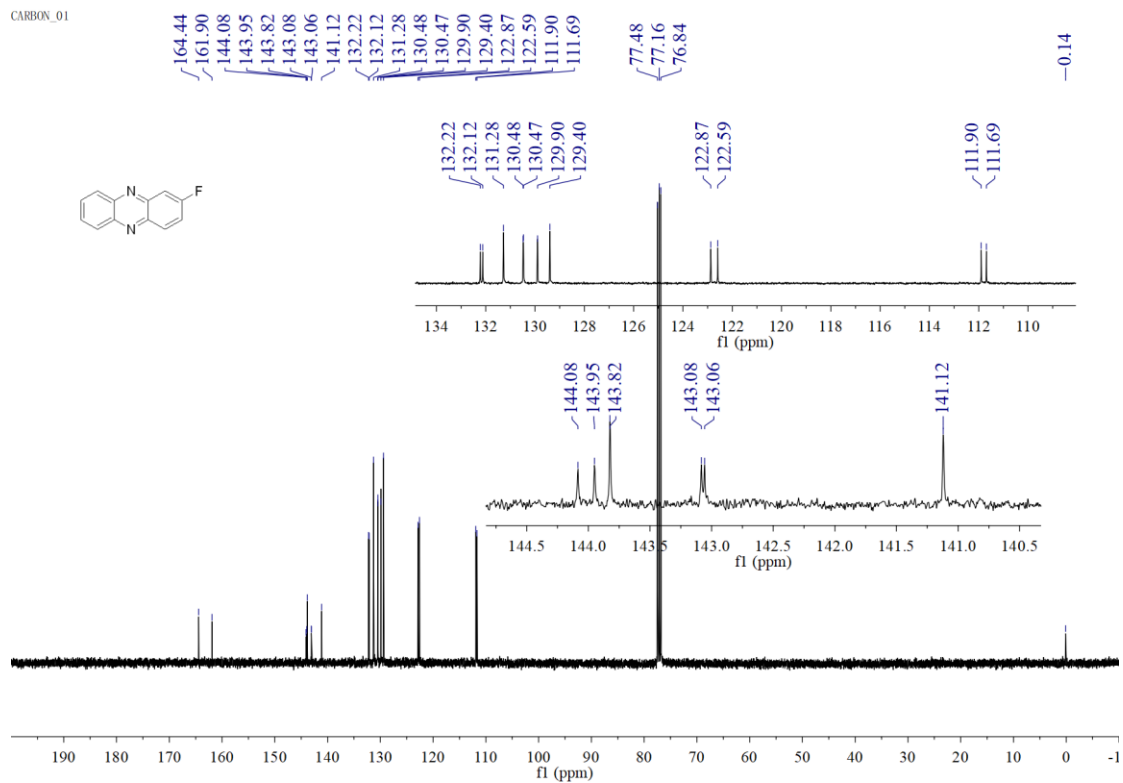<sup>13</sup>C NMR spectrum of **6m** in CDCl<sub>3</sub>

FLUORINE\_01

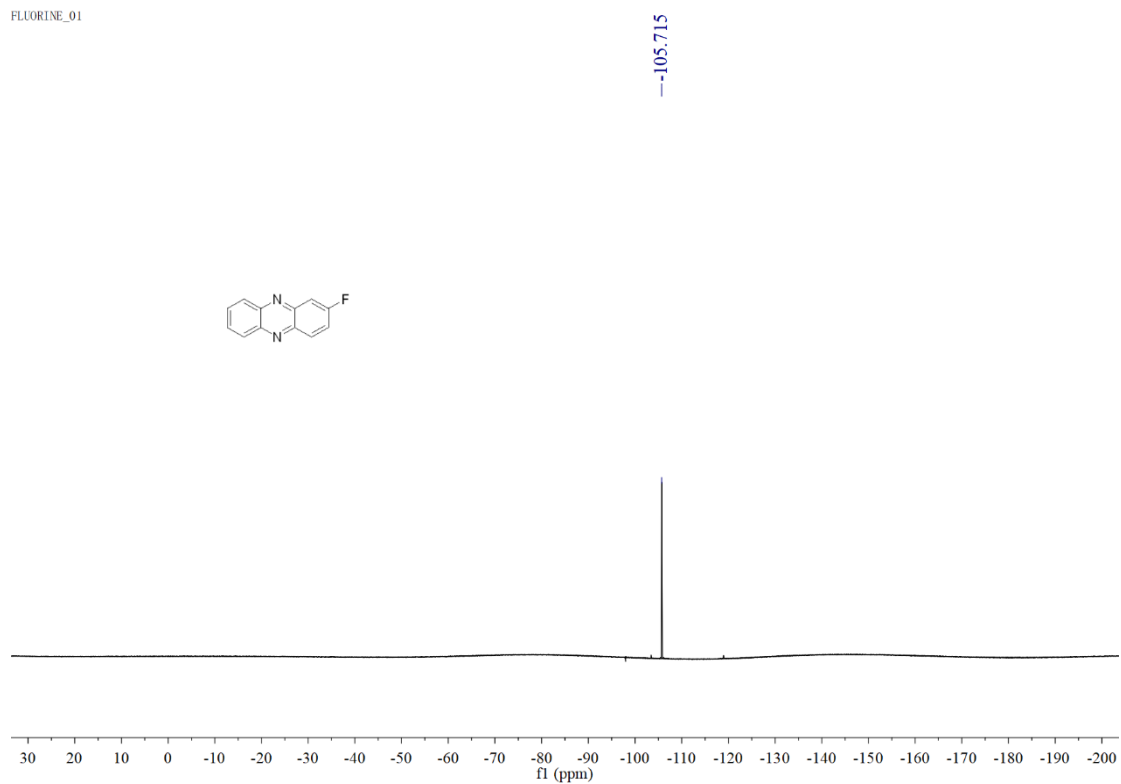<sup>19</sup>F NMR spectrum of **6m** in CDCl<sub>3</sub>

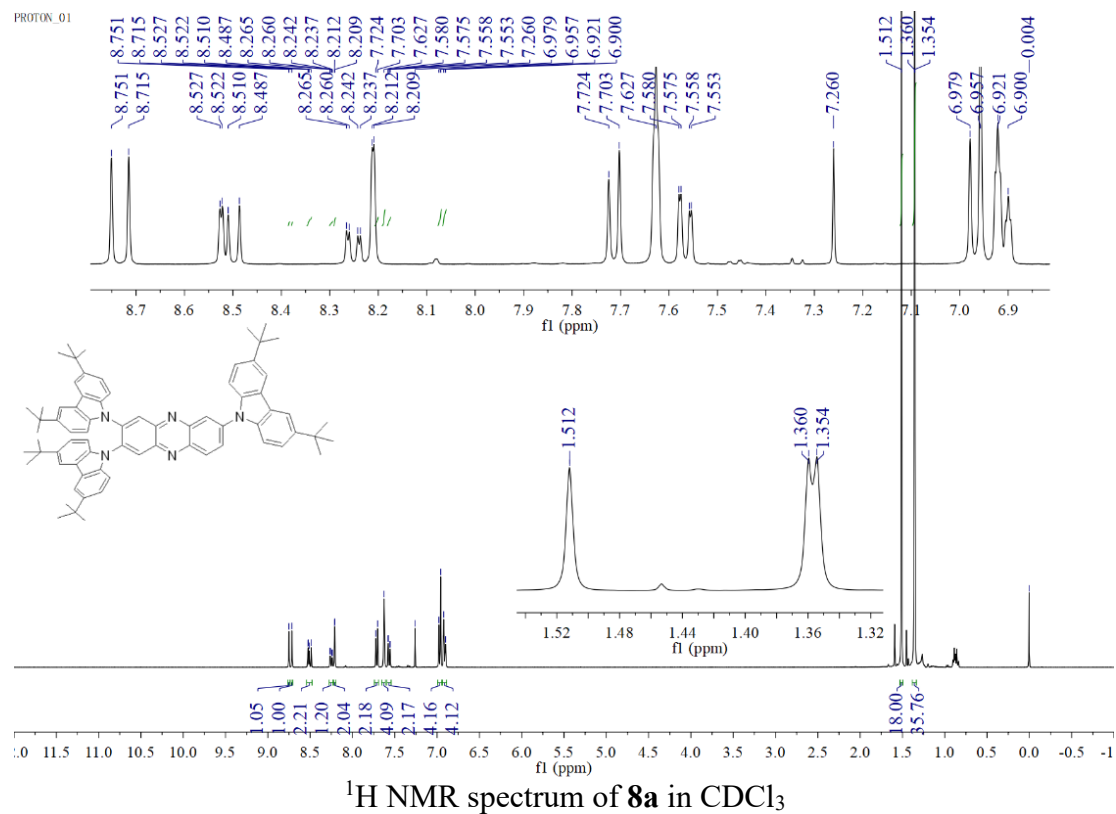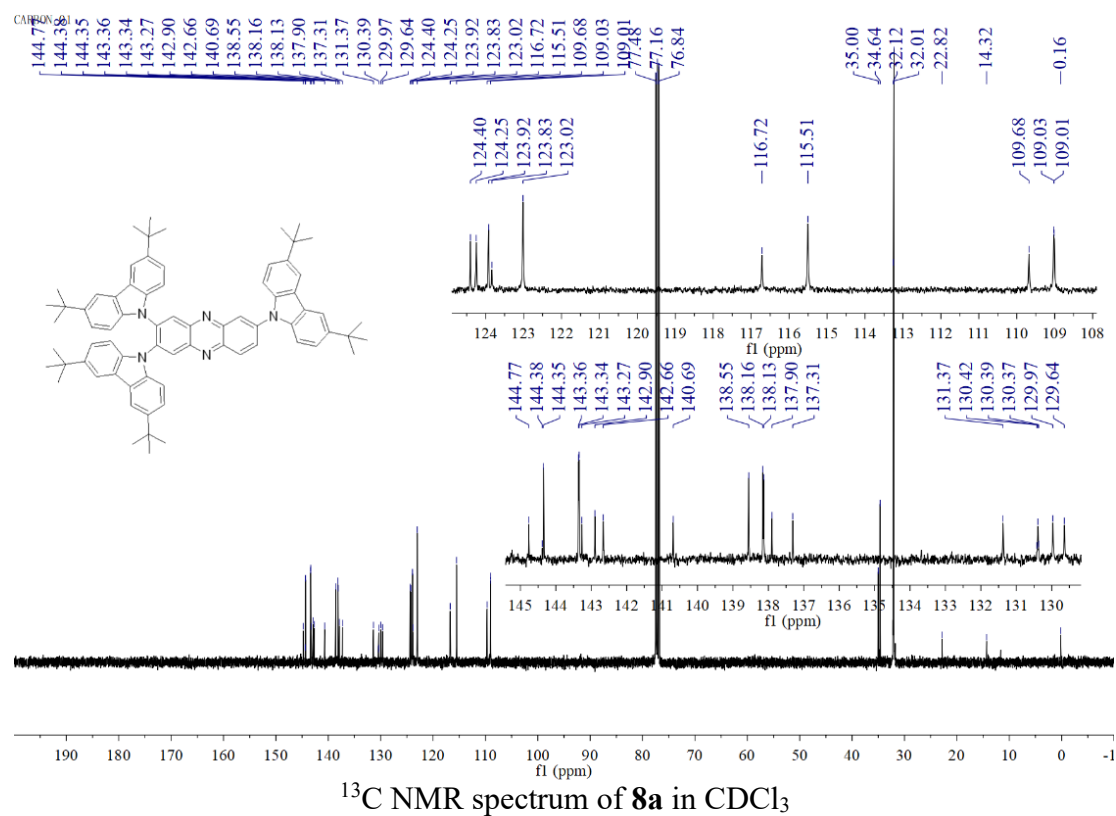

Supplement: d1cc06705b1.pdf [file d1cc06705b1.pdf]
